# Supplementary material for: High-density 80 K SNP array is a powerful tool for genotyping G. hirsutum accessions and genome analysis
Source: BMC Genomics. 2017 Aug 23;18:654. doi: 10.1186/s12864-017-4062-2 (PMC5569476; doi:10.1186/s12864-017-4062-2)
Supplement: Supplementary file 6 — Information on SNP loci in the CottonSNP80K array. (XLSX 9317 kb) [file 12864_2017_4062_MOESM6_ESM.xlsx]

## Sheet: Sheet1
Table S5. Information on SNP loci in the CottonSNP80K array.
No.	Locus name	Chromosome	Position (bp)	Score	Sequence(TM-1在前)	Gene name	SNP position	Ref allele	Alt allele	Ref codon	Alt codon	Ref AA	Alt AA	Gene_chr	Gene_start	Gene_end	strand	Arabidopsis ID	ArabDesc	Swissprot_id	SwissProt_desc
1	TM1	A1	150581	0.858	ACAATCGTTCTATGCACTTAAAAAATTGCCATGAATAAATCAATATGTAAATCCCACTTC[A/G]ACCTGACTTCCAAAAATTATCTTAAAATCGGCATGAAGAAATCAATACTTAAATCCGACT	Gh_A01G0025	intron	A	G					A01	149998	158450	-	AT4G38600	HEAT repeat ;HECT-domain (ubiquitin-transferase)	Q6WWW4	UPL3_ARATH E3 ubiquitin-protein ligase UPL3 OS=Arabidopsis thaliana GN=UPL3 PE=2 SV=1
2	TM2	A1	238734	0.935	GCACCTTAGGATCACAATTAAGAGAATAAAAACCATCAACTACACCGAAAAAAGGGATCC[T/C]ATCTCTCTCTCTTCCTGCTTTCAATCTTAAACTTTATTGCCTAACTCTAATTTTATCTTC	Gh_A01G0036	utr	T	C					A01	236338	238130	-	AT5G07930	MEI2 C-terminal RRM only like 2	A2WY46	EAR1_ORYSI Protein terminal ear1 homolog OS=Oryza sativa subsp. indica GN=PLA2 PE=2 SV=1
3	TM3	A1	248202	0.935	TTTGTTAGCGAACCCATGCCAGAAAAACACGTGTTGATCCTAAGGAAAAATACTTGTTAG[G/C]ATACATAAGACACAGTTAAACTTGATACGTCACATCAAATGACGTAACTTATAAATATGA			G	C
4	TM4	A1	253506	0.858	CCCCAGTTTTCTTCTCAAATTTTAGTTCATTGGTTGTAGACCATATAATAACATGTTCTG[T/G]CAATAGGCTTTACTCAAGTTTATCTCTAGCACTTGATTAATAAATGTTCTTTTGGTGCCA	Gh_A01G0037	intron	T	G					A01	251025	260711	+	AT4G39050	Kinesin motor family protein	Q6S001	KIF11_DICDI Kinesin-related protein 11 OS=Dictyostelium discoideum GN=kif11 PE=3 SV=1
5	TM5	A1	255638	0.719	TAAACTTTTCTTGTCAAATTATTCATCTTTGTCTTTGGTTTTATTGACTGGTGTCTTGAC[A/T]AGAATTTTTAGTTCTATAATTAAATCATCTGGTTTCAATGTGAAGGTAATAGGAAAGTTA	Gh_A01G0037	intron	A	T					A01	251025	260711	+	AT4G39050	Kinesin motor family protein	Q6S001	KIF11_DICDI Kinesin-related protein 11 OS=Dictyostelium discoideum GN=kif11 PE=3 SV=1
6	TM6	A1	258004	1	GGATATTCCTAATGGTAGGAAGAACTGGGGGTAGACTGACATGATCTATTATTGATCCTG[G/A]TTCTCCAGTCTATAAATTTTAACATTATCTGAGTATCCATGAGGTTATAAAACCGAGGAC	Gh_A01G0037	intron	G	A					A01	251025	260711	+	AT4G39050	Kinesin motor family protein	Q6S001	KIF11_DICDI Kinesin-related protein 11 OS=Dictyostelium discoideum GN=kif11 PE=3 SV=1
7	TM7	A1	446586	1	TGCATCTAAGGCGAATTGGAAGATCATATTGTTAAAACGAGATGGCATTTTGCAGGTCTG[G/A]AGTAACAATCTTTATGTGAGTGCGGAGCACAGAGTTGTGGTGAATTCCGAACGGGAAAGA	Gh_A01G0056	exon3	G	A	TGG	TGA	W	*	A01	440776	446847	+	AT3G19000	2-oxoglutarate (2OG) and Fe(II)-dependent oxygenase superfamily protein	D4N502	DIOX3_PAPSO Codeine O-demethylase OS=Papaver somniferum GN=CODM PE=1 SV=1
8	TM8	A1	466275	0.915	TGGGATCAAAAAAGGGAGACGGCAGAGGCCGCGGGAAGGGCCGAGGGCGTGTTCAAAACC[C/A]CAACAGACGAGGCCAGCTCCCAACATCACCTCAACCTATCAACCCAACGACGCAATGTGA	Gh_A01G0059	exon9	C	A	CCC	CAC	P	H	A01	460673	466432	+	AT3G19090	RNA-binding protein	Q5XI01	LARP7_RAT La-related protein 7 OS=Rattus norvegicus GN=Larp7 PE=1 SV=2
9	TM9	A1	469142	1	TGCATTCCCCGAATCTTCTTTATTAGAAATACATAATTCACTTAGGTCATTAAGCAACGC[G/A]GTGATTTGGACTAAATCTTGGCCGCCGAATTTATCCTTCGAATCGGCATTCAGTTGATTC	Gh_A01G0060	exon2	G	A	ACC	ACT	T	T	A01	467257	469512	-	AT4G33945	ARM repeat superfamily protein	Q6NXE6	ARMC6_HUMAN Armadillo repeat-containing protein 6 OS=Homo sapiens GN=ARMC6 PE=1 SV=2
10	TM10	A1	471985	0.988	TATGCATATATATATATCTTCACAGCATATATATGCACTAAACTTAACTGCAAAAAGGCG[A/T]ATCTCGGCAATATATGTATCATTTGTATCAGGATCCATCAATCCCTGGAAGATTCTCTTG	Gh_A01G0061	exon3	A	T	ATT	ATA	I	I	A01	470819	474700	-	AT4G33940	RING/U-box superfamily protein	Q28DS3	RN170_XENTR E3 ubiquitin-protein ligase RNF170 OS=Xenopus tropicalis GN=rnf170 PE=2 SV=1
11	TM11	A1	544619	0.714	AAGTGACCTGAAAGGAAAAACTAAACATAGCATCAAACTCAATACAAATGTTAAAAACTA[A/G]AAATTAATGGGTCAAAACAATAAATATGAATAGCAGTAACTTTATTTATAAATTTTAAGC	Gh_A01G0065	intron	A	G					A01	543527	550460	-	AT1G49670	ARP protein (REF)	Q8BGC4	ZADH2_MOUSE Zinc-binding alcohol dehydrogenase domain-containing protein 2 OS=Mus musculus GN=Zadh2 PE=2 SV=1
12	TM12	A1	567778	0.858	TGCTAAAGTTATTCCCCTATTTGTAAAAATCAAAATCAAGTGAGTGTATGGTAAAATACG[C/T]ACTTTGAAGAAAATGATCAAGCAAGTAATAAATAAAGAAAACTTCAAATCGAACTTACTT	Gh_A01G0066	intron	C	T					A01	556731	568231	-	AT1G49670	ARP protein (REF)	Q8BGC4	ZADH2_MOUSE Zinc-binding alcohol dehydrogenase domain-containing protein 2 OS=Mus musculus GN=Zadh2 PE=2 SV=1
13	TM13	A1	674765	0.988	GTTGTACCCCTAGGACCGTATAAGTCCAACTTTTGTGCTCATGTAATGGGACAAATTAAC[A/C]TTTAGTCCCTAAATTTGAGAACTTTTTTCACACTAGTCACTATTTTCTTTTTCATATTAG			A	C
14	TM14	A1	677469	0.965	AGCCTTTTCTATTAAAAACTCTATTCATTTGTACTGTTAACTAACCAAACAGTGACATAT[C/G]GCATGTCACGTGCACTTCATGCTAACATACATGAATCAATTTTTAACAATATAAATAGAT			C	G
15	TM15	A1	686832	1	CTTCTTTTGAGTTCACAGACTCCTTCTTCCCCTACGAATGATGGTTTCAGTAATCGGTCT[G/A]GTTCTGTTAATCCTGTTGGTTCTTCTTCAATAGCTTCTAGTTCCTCATCTGGGCCTGGTG			G	A
16	TM16	A1	695051	0.976	ATAACCATCTTTGAGCTTCGCATTAAGCTCCGCCACGAACCCAGATTTCAAACCCTCACA[G/A]TAATCCAAGAAATACGCCGTCACGGCGTACCCGTCGTACCAATGCTCGCCGTCCCCCGGT	Gh_A01G0083	exon1	G	A	TAC	TAT	Y	Y	A01	694910	695695	-	AT2G15220	Plant basic secretory protein (BSP) family protein	0	0
17	TM17	A1	716901	0.949	CAACAATGGGTCACTCTAACGTATGGAACTCTCACCCGAAAACCTACGGCCCTGGATCTC[G/A]CTCCTGGTAATTGTTTCCTTCCCTTTAATTCTTATTTAGTTTCGTGAAATTGCCTTTATT	Gh_A01G0088	exon1	G	A	CGC	CAC	R	H	A01	716846	717833	+	AT3G43980	Ribosomal protein S14p/S29e family protein	Q680P8	RS29_ARATH 40S ribosomal protein S29 OS=Arabidopsis thaliana GN=RPS29A PE=2 SV=2
18	TM18	A1	728785	1	TTTTAAACATTAACTTTGAAGAAAACACTTAATCCGTGCAAATAAAATCTTGATTCTCAC[G/A]TTCACAGTGACTGTATCCATCTCCTTTGAATTGCATGCCATCAACCAAGGGACATTCACA	Gh_A01G0090	exon4	G	A	CCT	TCT	P	S	A01	726830	731316	-	AT2G14740	vaculolar sorting receptor 3	O80977	VSR3_ARATH Vacuolar-sorting receptor 3 OS=Arabidopsis thaliana GN=VSR3 PE=2 SV=1
19	TM19	A1	870674	0.976	GCGAGCTGACTTAGGGTGGCGGGTAATGCTTGGTGCCGGCGCTATTCTGTCGGTTTTCTT[T/G]GCTATTGGGGTTCTTGCAATGCCTGAGTCACCTCGTTGGCTGATTATGCAAGGTCGATTA	Gh_A01G0100	exon2	T	G	TTT	TTG	F	L	A01	869775	871178	+	AT3G18830	polyol/monosaccharide transporter 5	Q8VZ80	PLT5_ARATH Polyol transporter 5 OS=Arabidopsis thaliana GN=PLT5 PE=1 SV=2
20	TM20	A1	875363	1	CGGCGTTGGAGCCATCTCATCGATTTTCTTGGCATTTGCAGTTTTAGCAATGCCGGAGTC[C/G]CCGCGTTGGTTGGTCATGCAAGGTCAATTGGATGAAGCCAAGGTTGTGCTTGATAAAACT	Gh_A01G0101	exon4	C	G	TCC	TCG	S	S	A01	874304	875999	+	AT3G18830	polyol/monosaccharide transporter 5	Q8VZ80	PLT5_ARATH Polyol transporter 5 OS=Arabidopsis thaliana GN=PLT5 PE=1 SV=2
21	TM21	A1	878143	0.899	ACCGCCAACCTATCCTTGTTGGTAGCTTTGAAAATGCATAGTTTGAAACATAGCCTAATA[A/T]TATCCCCACATTAATACACACCTACAAATATTAAAAAAAAAAATTCTTAATTATAAAGGA	Gh_A01G0102	exon3	A	T	TTA	ATA	L	I	A01	877529	879782	-	AT3G18830	polyol/monosaccharide transporter 5	Q8VZ80	PLT5_ARATH Polyol transporter 5 OS=Arabidopsis thaliana GN=PLT5 PE=1 SV=2
22	TM22	A1	887670	0.935	GGTTGTAAATATTTGATTATAATTATAAATTTGATTGCGCCCATGAGGCCTTTGATGCTC[C/A]AGGTTTGACTCACTTTGTATAAATCCTGTGCGTCAAATGATTCAATTATGTTTCTAATTA			C	A
23	TM23	A1	892037	1	TGGACAAAATCCACATTGAGTGAGTAAATATGTCACTCGTGCCTTATTTGGCAATGTCAG[A/G]AACGGAAACATGACTGCCTGTGCCACCCTCCTTGAGCTCGAATATTATATAAATATCCAA	Gh_A01G0104	intron	A	G					A01	888917	893602	+	AT1G63110	GPI transamidase subunit PIG-U	Q8CHJ0	PIGU_CRIGR Phosphatidylinositol glycan anchor biosynthesis class U protein OS=Cricetulus griseus GN=PIGU PE=1 SV=3
24	TM24	A1	907934	1	GAAGACGGGTGTGTTTATTTCACGATTGCCGATAAAGCTGTCGAAAACCATGGTGTGCTT[C/A]GGTTCCTACAGCACATGAGAGAAGAATTTAAAACCCTTGCTAGGAAAGGTTCGAGAAGTA	Gh_A01G0108	exon2	C	A	CGG	AGG	R	R	A01	906947	908521	+	AT4G10170	SNARE-like superfamily protein	Q84WF5	VAMPL_ARATH Probable VAMP-like protein At1g33475 OS=Arabidopsis thaliana GN=At1g33475 PE=2 SV=1
25	TM25	A1	924013	0.988	CGTACTGCAGAACTTGTTCGCCAAGATAAAGAAGTTAATAAAGAGCTGCAAGCAACGGAA[G/A]CAATTGAGAGCTTGAAAAATATGGACCCTGTTGTGAAGGGAAAATACAGTATATGGAGAA	Gh_A01G0111	exon4	G	A	GCA	ACA	A	T	A01	922892	927628	+	AT4G38270	galacturonosyltransferase 3	Q0WQD2	GAUT3_ARATH Probable galacturonosyltransferase 3 OS=Arabidopsis thaliana GN=GAUT3 PE=2 SV=2
26	TM26	A1	935804	0.996	GTTCCGGTTCCAGTTCGTTAATTTCCGGTTCCCGTTCCGGTTCATCTCTATTGACGTTCC[C/A]TTGAGCTAACGCCGATTTGTCACGGATCAACTCGTCGAGGAGGTCGAGTTTCTTTTGAGT	Gh_A01G0113	exon2	C	A	GGG	TGG	G	W	A01	935025	938210	-	AT1G03050	ENTH/ANTH/VHS superfamily protein	Q9SA65	CAP4_ARATH Putative clathrin assembly protein At1g03050 OS=Arabidopsis thaliana GN=At1g03050 PE=2 SV=1
27	TM27	A1	941953	1	CTACAGCGACTGGTGAAATCGGACTCTCTCGTCCGTTACAGAGTCGAAGTCAACTCATTT[G/A]GAGTGGAGGCAACTTGGTCATAGGAGGGAAAAATGTATGACCGTTTCTTTAAAGAGAGGC			G	A
28	TM28	A1	945752	1	AAGTTGTAGGATATTAAGACATGAACTGTAAAATTAATGTTCTTTGAGAATACCATCAAG[G/C]TGTAGCCATCTAGGTACCAAAAACTAGAGCTTAGGATTTCAAGGCCCCTACTACATAATG	Gh_A01G0114	utr	G	C					A01	943513	944820	+	AT5G64090	0	Q8IXS8	F126B_HUMAN Protein FAM126B OS=Homo sapiens GN=FAM126B PE=2 SV=1
29	TM29	A1	952276	0.965	AAAACAAGCCTATTACATGCCATATAATCCAAAACAAACGTTCAAAAACTACCAAAAACA[G/A]ATGGATAGTGTGACTCGAGTGCTAATCTAATTGTCCAACCTTTAAAAGTATCTACAAGAA			G	A
30	TM30	A1	954713	1	CCTCTACTACATAATGATGATTAGATACTATATTTCTCCAAAGCCGGTAAAAGTTTTATA[A/C]AGGCCCTTACATTAGGAGTCGGATTGCATTTTGCCTCTTTACTAAAAACAATGAACAATA			A	C
31	TM31	A1	957691	1	TTAAGATTTCAAGGCCCCTACTACATAATGATGAGTAGATACTATATTTATCCAAAGACG[G/A]TAAAAATTCTATAAAGGCCCTTGCATTAGGAGTCGGATCGCATTTTGCCTGTTTACTAAA			G	A
32	TM32	A1	976208	0.965	TAAACATACAACTATGTCTTCATGCTACCTTGCCTATCATGTCAACTATATCGATGTATA[C/T]TATATTTCTACATTCAAATAACAGGTTTAATAAATTAAATAACTAGCACACAACAACAAC			C	T
33	TM33	A1	1002491	1	AATAGAAGGATAATGCGCTTTAGTGCACTTGAACCCACGTCCTCCTACATTGACAACAAC[A/T]CTCATACCAATCGAATTAAAACTCAACCAATTTGTCTACCATAATAGTTTCCTTCATACA			A	T
34	TM34	A1	1012265	1	TTCAAGTATCTATGACATGATAATGTTGAATTATGGGGTGTAATCGAGCCGAGCTGAGCC[T/C]AGCTTGAAATTCTAATCTCGAGATCGATTGAATAGTTATTTTTAAGCGTGAGCTCAACTC			T	C
35	TM35	A1	1088215	1	GTCAGCTTCTGGACAAGGATGATGCTTTGCAATGGACCCATTGCGTCTATAATTAATACT[G/T]TTACGGCGTTTGCCAATGTTGGCCCGACCAGGATATTACATGAATGATTTTCACAAATGG			G	T
36	TM36	A1	1096623	1	GGTAATCAGCATATAAAGATGCACGATGTGATTCGTGATATGGCTTCGTGGATTACTGGT[G/A]AATCTGGAAAGGAAAAGTTTTTTTGTAAAAGCAGGTGTTCAATTGAAGGAACAGCCGGAA			G	A
37	TM37	A1	1115613	1	AACCAGGTATGGGTAATATCTTCTCAATCTCACTTTCACTCGATCCCATCATTACCCGTT[T/G]CTCGGATTGTGCGACTGGACGGGCAAGTTATATATGCAACCTCGAAGATAACCTCCATGC			T	G
38	TM38	A1	1133291	1	AACTGATTGTCCAAAGTCCTCAGCAAGTTGAAAAGCTATGTATGGGAGGTTGTTGTTCCA[A/G]GCATCCCAGGTCCACCCACAAGTTCGGGAAGCAAATCGCCACAATACTCCAAGAGGTGAA			A	G
39	TM39	A1	1141675	1	TTACCTCCTCTGCATTTTGAATCTAGACACCTGCTTTGAAGGTTGAGAACCAGATGATTG[G/C]AGAGGGCATTAATTTTGCAATAAGTTGGTGGCTGTACTACTTAATAATTACATACTCACA			G	C
40	TM40	A1	1238121	0.9	ACAAAAAGGCAAAACTTTAGATTGAAGTTACAAAATAACAGTACTTAAAACATGGACAAA[G/A]GAAGAGATTATAAGCACCTGTCTAGATCTTCCTCCATCTAGTTTCTGACGTTTAACGGCT	Gh_A01G0133	intron	G	A					A01	1235527	1239772	-	AT1G03780	targeting protein for XKLP2	F4I2H7	TPX2_ARATH Protein TPX2 OS=Arabidopsis thaliana GN=TPX2 PE=1 SV=1
41	TM41	A1	1243203	1	TACACAAATTCAAATTGAGTAAACTTTTTAAGCCCAAACTCAGCAATTAGGCGAGGTGGA[T/C]TTTCCCATCAATGAACAACTCTAAGGAAAATTAAACCTAGAAACATTCATGACTAGGGCA	Gh_A01G0134	utr	T	C					A01	1242782	1243129	+	AT5G44265	Bifunctional inhibitor/lipid-transfer protein/seed storage 2S albumin superfamily protein	A8MQA2	NLTPD_ARATH Non-specific lipid-transfer protein 13 OS=Arabidopsis thaliana GN=LTP13 PE=2 SV=1
42	TM42	A1	1247134	0.877	GACTGACTGTCCTTTTGCTCATCCAGGTGAAAAAGCCCGCCGTCGTGACCCTACTCGGTA[C/T]CAATACTCCTCCACCATCTGTTCTGACTTCCGCCGGGGCGGTGGTTGTCCTCGCGGCGAT	Gh_A01G0135	exon1	C	T	TAC	TAT	Y	Y	A01	1246811	1247830	+	AT1G03790	Zinc finger C-x8-C-x5-C-x3-H type family protein	Q9ZWA1	C3H2_ARATH Zinc finger CCCH domain-containing protein 2 OS=Arabidopsis thaliana GN=At1g03790 PE=2 SV=1
43	TM43	A1	1253331	1	GTTTTGTTAAAGGAAGTAATGAGTTGTTTAGGAACCATGAATTTATCCGAAGTAACTTCA[C/T]CAATGGCGCCTACTGCAAATACAAACATTCCATGGCTTGATGTTTCATTCAAAGGAGCTC	Gh_A01G0136	exon1	C	T	CCA	TCA	P	S	A01	1252497	1253522	+	AT1G03790	Zinc finger C-x8-C-x5-C-x3-H type family protein	Q9ZWA1	C3H2_ARATH Zinc finger CCCH domain-containing protein 2 OS=Arabidopsis thaliana GN=At1g03790 PE=2 SV=1
44	TM44	A1	1271743	1	TCTTACCATTGCAACTTCTGAATCTGAATCATGACTAAGCCTGCTTAATGTGTCCATAAC[G/A]TTAACCTGCATAATATCACATCGATCAAGCTCGTTTGCTGTGATGAAAAACTGGTGACTC	Gh_A01G0138	exon20	G	A	AAC	AAT	N	N	A01	1270694	1277010	-	AT2G20580	26S proteasome regulatory subunit S2 1A	Q9SIV2	PSD2A_ARATH 26S proteasome non-ATPase regulatory subunit 2 homolog A OS=Arabidopsis thaliana GN=RPN1A PE=1 SV=2
45	TM45	A1	1277451	1	CCCACGTTATAGTATTACTATAGTATTTAATTTCACCGCCATTATTATTTTTACACTAAT[T/C]GCAAATAAATGCACCACTCATCCAAAGGGGCCCTAAGGCCCTAATTATCTTTTTTGGTAA	Gh_A01G0138	utr	T	C					A01	1270694	1277010	-	AT2G20580	26S proteasome regulatory subunit S2 1A	Q9SIV2	PSD2A_ARATH 26S proteasome non-ATPase regulatory subunit 2 homolog A OS=Arabidopsis thaliana GN=RPN1A PE=1 SV=2
46	TM46	A1	1286244	0.996	TCCTCGATTTTTTCTCCCGACGCATTCATCTCCGATTCCTCGCCGGCGGGGGGCAATTCA[A/G]CCAAAATTTCGGGGTCCATCTCCAAATCAGGTAACACGTCGCCATCAACACCGATGCTGA	Gh_A01G0139	exon1	A	G	GTT	GCT	V	A	A01	1284402	1286452	-	AT2G20570	GBF\'s pro-rich region-interacting factor 1	Q9SIV3	GLK1_ARATH Transcription activator GLK1 OS=Arabidopsis thaliana GN=GLK1 PE=2 SV=2
47	TM47	A1	1306298	1	CCAGTGTAATCCAAGCAATTCCAATACGTCTCTTGACCAACTTTATAGCCATGTGAACAT[A/G]TCACTAGCTACAACTTAGAATAAATTAGCAACTAAATAAAAGCTAACATCTTATAATTGA	Gh_A01G0141	intron	A	G					A01	1303840	1308420	-	AT1G06290	acyl-CoA oxidase 3	P0CZ23	ACOX3_ARATH Acyl-coenzyme A oxidase 3, peroxisomal OS=Arabidopsis thaliana GN=ACX3 PE=1 SV=1
48	TM48	A1	1334206	0.996	ACTCCAAACTTTGAAGCTCTTCTTTGCAAGTTGGGCAATTTTTTTTCCACTCTCGAAGTA[C/T]TCCTGAATTGCGTTCCTTTCGAAGCTATGGCCACAAAAAACCGCAACTGGATCGACCATC	Gh_A01G0143	exon2	C	T	GTA	ATA	V	I	A01	1331503	1335072	-	AT1G76390	ARM repeat superfamily protein	Q9SFX2	PUB43_ARATH U-box domain-containing protein 43 OS=Arabidopsis thaliana GN=PUB43 PE=2 SV=1
49	TM49	A1	1383170	1	TCACATGCCACAAATCAAAACATGTGACGGATGCATACAAAGCATCCCAAGGAGATCAAT[T/C]GATTAAAAGGAGTTTATTTGACCTACTTGAACTGACCCGATTCGTGAAACATATAAAGAA			T	C
51	TM51	A1	1632557	1	TGTCTTTCGACCTTAAAAAGGAGTACTTTTGGTCATTCCCGAGATTGCACATGTCGTCCT[C/G]TCATTGGTTCTGCACTTCCTGGAGCATAGCCAACCTAATTATGTCCTGCCCCCCGTAAGT	Gh_A01G0161	intron	C	G					A01	1629121	1633491	-	AT5G13110	glucose-6-phosphate dehydrogenase 2	Q43793	G6PDC_TOBAC Glucose-6-phosphate 1-dehydrogenase, chloroplastic OS=Nicotiana tabacum PE=2 SV=1
52	TM52	A1	1645894	0.988	AACTCCAGCAACATCATCAAATGTTACACCGGTGTTGGGTTCCATTTGAAACTTTGCTTT[C/T]GATTGACCAAAAGCAAGGGGAAAACCAGGCCCACCCGGACCTCCCATTCCACCAGAGGAT	Gh_A01G0163	exon1	C	T	TCG	TCA	S	S	A01	1643805	1646568	-	AT2G30950	FtsH extracellular protease family	O80860	FTSH2_ARATH ATP-dependent zinc metalloprotease FTSH 2, chloroplastic OS=Arabidopsis thaliana GN=FTSH2 PE=1 SV=1
53	TM53	A1	1685895	1	ACCATCTAAGTCTGTAATATTCCGAATTAAGGCCTAATCGGAATAGTGGTTTCGTGACCA[C/A]AAATCCGAAATAGAAATAATTATTTTATAATTATTTTGAGGTTTATGATATGATTGCATA	Gh_A01G0167	intron	C	A					A01	1680923	1711236	+	AT5G27600	long-chain acyl-CoA synthetase 7	Q8LKS5	LACS7_ARATH Long chain acyl-CoA synthetase 7, peroxisomal OS=Arabidopsis thaliana GN=LACS7 PE=1 SV=2
54	TM54	A1	1691390	0.935	ACAGCTTTCTAGCTACCTGCGTCACTGTTACAAGAAAAATCATATCTTTAGTTACAAAAC[A/T]TGAAATCAAGATCTGTAAATTTTCCTTAAATATAGACTCATATATCTATTTACTAATTTT	Gh_A01G0167	intron	A	T					A01	1680923	1711236	+	AT5G27600	long-chain acyl-CoA synthetase 7	Q8LKS5	LACS7_ARATH Long chain acyl-CoA synthetase 7, peroxisomal OS=Arabidopsis thaliana GN=LACS7 PE=1 SV=2
55	TM55	A1	1709054	1	GCTTAGCTATTTAGCGAGTTCCCCCTCACTAAAAGTTTGGCCATTGGGACTCAATGATAC[A/G]TAAACATACGTACACATACACGCACTCATGTATGTGTGTTATTAAAGAATATGCCCTTTT	Gh_A01G0167	intron	A	G					A01	1680923	1711236	+	AT5G27600	long-chain acyl-CoA synthetase 7	Q8LKS5	LACS7_ARATH Long chain acyl-CoA synthetase 7, peroxisomal OS=Arabidopsis thaliana GN=LACS7 PE=1 SV=2
56	TM56	A1	1718871	0.965	TATCAATATTTCTGTCGAGAACTTTGCTGGATGGAAGTTTGCATTGACTTTTAACATAAT[A/T]CAAAAATCATATCTGGCTGGGTTTTTAATGTACATCTTAATCAACTTAGCTTTAGTCTTT	Gh_A01G0168	exon3	A	T	ATA	ATT	I	I	A01	1718022	1727243	+	AT5G26240	chloride channel D	P92943	CLCD_ARATH Chloride channel protein CLC-d OS=Arabidopsis thaliana GN=CLC-D PE=1 SV=2
57	TM57	A1	1724797	0.858	GTTTCTTTTGATAGAGTAATTGCTTACCTCTTTATTTCATATTGACAGCCTTTTATAGAC[T/G]GTTAATGACAAAGGAAATAGTCCTAATTGATATAAAATAGAATTCCTAACTTAGAGTTTA	Gh_A01G0168	intron	T	G					A01	1718022	1727243	+	AT5G26240	chloride channel D	P92943	CLCD_ARATH Chloride channel protein CLC-d OS=Arabidopsis thaliana GN=CLC-D PE=1 SV=2
58	TM58	A1	1732931	1	GGTAACTCTTTTTCCAGGCTCAAGTGCTTGATCAACCACAACATTCTGCATAAAGAACCA[A/T]GAAATAGCCGAAACCAGTTCATAAGTAATATATTAGTATCACACTCCTTAGTATACAAGT	Gh_A01G0169	intron	A	T					A01	1730831	1735216	-	AT5G19300	0	Q3UHX9	CI114_MOUSE Uncharacterized protein C9orf114 homolog OS=Mus musculus GN=D2Wsu81e PE=2 SV=1
59	TM59	A1	1738945	0.988	TATTGTAACAATATTATAACGTGAGATAAAAAATAAACTAAACACACAATATCGCTCATC[C/T]AAACCCATAATAAATCTAATCAGGGTTCACAGTAATAGAGGAAGTGGCTCAAAAAAAACT	Gh_A01G0170	utr	C	T					A01	1736794	1738636	-	AT2G32090	Lactoylglutathione lyase / glyoxalase I family protein	0	0
60	TM60	A1	1744949	0.965	AAATTGAGTGATTTTAGTTTTAGGCCTTTATTGATGAATGTGGGTTCATTTTTTGTATTT[T/C]TTTTTACTTCTCCTCGCATTCCATATATGAGAACTTGTATGTGTATGGTGTAGCTGTGAT	Gh_A01G0172	intron	T	C					A01	1744209	1747622	+	AT1G04190	Tetratricopeptide repeat (TPR)-like superfamily protein	O16259	STIP1_CAEEL Stress-induced-phosphoprotein 1 OS=Caenorhabditis elegans GN=sti-1 PE=1 SV=1
61	TM61	A1	1749114	0.988	ACATTGTTTTAAGAGCCACCTAAAATCAAAATTCCATCGGGCAAGCTCTCCACGATGGCC[T/G]TCCTGTCGAAGAAACCATGACCTAGAGAACTATATGCAACTATACCAAATCCGAGTTGTC	Gh_A01G0173	utr	T	G					A01	1749253	1749877	-	AT1G60710	NAD(P)-linked oxidoreductase superfamily protein	Q3L181	PERR_RAUSE Perakine reductase OS=Rauvolfia serpentina GN=PR PE=1 SV=1
62	TM62	A1	1751667	0.858	GGATTCGAAAATTCATATTCAGATTTGAATTTTCTTTTAAGATCAATGATTTTTGTGATC[G/C]ATTTTAATGATTTGTTGGTGGTGTTGAAAACAAGTTTTTCTGTTCAATGCAGATAACTTC	Gh_A01G0174	intron	G	C					A01	1751090	1753132	+	AT3G22845	emp24/gp25L/p24 family/GOLD family protein	Q9LIL4	P24B3_ARATH Transmembrane emp24 domain-containing protein p24beta3 OS=Arabidopsis thaliana GN=At3g22845 PE=2 SV=1
64	TM64	A1	1763796	0.935	TATTGTGTGACAAAGGTACAGGCTATACTGTTTTTTTTTACGGATCGGTTAGCTTTTAAT[A/G]AACTATACTCCTAATGGAGTTGCTGTCAGGGCCTGGTGGTATTAACCATATAAAGGGGCT	Gh_A01G0176	intron	A	G					A01	1761616	1765097	+	AT4G14500	Polyketide cyclase/dehydrase and lipid transport superfamily protein	Q8R1R3	STAR7_MOUSE StAR-related lipid transfer protein 7, mitochondrial OS=Mus musculus GN=Stard7 PE=2 SV=2
66	TM66	A1	1778325	0.935	TTGAAATTGGTGGCTACAAGTGGTATGGGGAATGATATTATTGGCTGTTATTTTCTAATT[C/T]GATTTCTCAAATTCATCATTGTCATTCTGGGATTCTTTCATAGCTTATTGAAACAATCAA			C	T
67	TM67	A1	1821817	1	TTTAAAGTCCCACACCACACGCCACTACGTTTATACAATGCTAAAAGAACGCAGATTTGG[T/G]TCAAGAGGAGCTGTTTCAAGTCACCCATCACTGCTAAAGTCGCTCAACAAAACGATTTGC	Gh_A01G0183	exon1	T	G	TTC	GTC	F	V	A01	1821682	1825521	+	AT1G04420	NAD(P)-linked oxidoreductase superfamily protein	P0A9T5	TAS_SHIFL Protein tas OS=Shigella flexneri GN=tas PE=3 SV=1
68	TM68	A1	1825087	1	TGGCATGGCTTCCGAAATAATCACGTAGTAACATGTGGTTGCCATGTGTATCTCATGCTG[A/G]CGTACTTGGACTAATTTTTAACAATAAAAATGGATGAAAATTTTAACATAAAGACTAGTT	Gh_A01G0183	intron	A	G					A01	1821682	1825521	+	AT1G04420	NAD(P)-linked oxidoreductase superfamily protein	P0A9T5	TAS_SHIFL Protein tas OS=Shigella flexneri GN=tas PE=3 SV=1
69	TM69	A1	1831990	0.899	CCAAGAAGTGTCAAAATTGCAAAATCAAGTACCAGTGATATACCTATTTGCTGTTCTGTT[A/C]TGATCAATACACACTGCTTGTGTTATCCATGCAGCTTGCCATCAAAAGTAATTTTTTTTC	Gh_A01G0184	intron	A	C					A01	1827663	1833086	+	AT3G23270	Regulator of chromosome condensation (RCC1) family with FYVE zinc finger domain	Q15751	HERC1_HUMAN Probable E3 ubiquitin-protein ligase HERC1 OS=Homo sapiens GN=HERC1 PE=1 SV=2
70	TM70	A1	1836310	0.965	TATCAAAATTTGACCAAAACTAAATGACAAGGTGAATGCAAAGCAATGGCATTGCCATTG[G/A]GCTAGAGTCCAAAGGAATAGTGTATTTTGTAACTTCTTAGTGTCATCATGTTCATGTCAT	Gh_A01G0185	utr	G	A					A01	1833841	1835451	-	AT4G27090	Ribosomal protein L14	Q9T043	RL142_ARATH 60S ribosomal protein L14-2 OS=Arabidopsis thaliana GN=RPL14B PE=2 SV=1
71	TM71	A1	1841868	0.935	GGCTTATAGAGAATGAAACATCGGATGTTTCTACATCAACACCAAGGCTGTCGAACATAT[C/G]CAATAGTGTTGCATATCTTGCCTGTCGTGTTTTATTTCATACAACTAATAAATTTCATGC	Gh_A01G0186	exon2	C	G	GAT	CAT	D	H	A01	1836756	1845330	-	AT3G23510	Cyclopropane-fatty-acyl-phospholipid synthase	P0A9H7	CFA_ECOLI Cyclopropane-fatty-acyl-phospholipid synthase OS=Escherichia coli (strain K12) GN=cfa PE=1 SV=2
72	TM72	A1	1863576	0.996	GGGCGGAAGTTAGCGAAGCTCTGCTGCAATTGGCTAAAGAAACCGAGGATTTGGCCGTAA[G/A]GGAAAGGGAGTTATTCAGTCCGATATTGAAACGGTGGCACCCGACCGCAGCCGGGGTCGC	Gh_A01G0187	exon3	G	A	AGG	AAG	R	K	A01	1861234	1865473	+	AT2G33420	Protein of unknown function (DUF810)	0	0
73	TM73	A1	1877510	0.988	TGTCTTATGTTGCTAGTATCTTAAGCTTCCAATGTGCAAATTTAGCTTCCATCTTGTCCA[T/C]CACAAGTTGAAATATTTCCTTTTTCTCTTGTATGCTATTAAGGTCCACTCCAAGACAGCT			T	C
74	TM74	A1	1887433	1	CATGTCCTGTCTTATTCGTAATAATGTAAATATACATGCCCCATGTATGAATGCACTGCA[C/T]GTCTCAGTCCTATTCACAGGGAAAAAGCTGGACATACTTGCAGAGATTGCAGTAAACAAG			C	T
75	TM75	A1	1895475	1	TTCAAAACATTAAACATTGCCTCGCCTTAGAAAACACGAGTGAAATTCTGAAGGGATACT[T/C]GATTATTTTGAACAAACGGGAGATTGCAACCCAGCACGATAGGGCACTATTCCCCGAATT			T	C
76	TM76	A1	1973540	1	ATAGGATTTGGTAGTCATAGTGGTAAGGGTTTACTTCAGTCCCAAGGTTCCGGTAAAAGC[G/A]GTTCCTCACCGGTAAGCTTCTTACGTGGCTTAAGCTTCAAGAAAAAGGGTATCATAGCTG	Gh_A01G0194	exon2	G	A	GGT	AGT	G	S	A01	1971820	1976433	+	AT3G06330	RING/U-box superfamily protein	Q9DBD2	MARH8_MOUSE E3 ubiquitin-protein ligase MARCH8 OS=Mus musculus GN=March8 PE=2 SV=1
78	TM78	A1	2026394	1	ACTAAACCATCCCATACCTTGTTTCTCTTGTTCTTTCCCTCTCAATCCACCCTTTACAGC[T/C]CTCAACTCACCTATATATATACACCCCCTACAAACTACCCCCATTGCCAATACCTTTTCT	Gh_A01G0206	utr	T	C					A01	2026488	2026826	+	AT5G24860	flowering promoting factor 1	Q0E1D7	FLP3_ORYSJ Flowering-promoting factor 1-like protein 3 OS=Oryza sativa subsp. japonica GN=Os02g0460200 PE=2 SV=1
79	TM79	A1	2032583	0.965	ATTATATTAAAAATATTCTTCTTTGTAAAGGTACGAACAAAGAACCAAAAATATCATTTT[C/G]TTGTTTCTTCAGACGATGCCACTAAGTACATAAAACATGGTACTGAATTCTCCCTCTGTT	Gh_A01G0207	utr	C	G					A01	2032820	2035398	-	AT4G15780	vesicle-associated membrane protein 724	O23429	VA724_ARATH Vesicle-associated membrane protein 724 OS=Arabidopsis thaliana GN=VAMP724 PE=2 SV=2
80	TM80	A1	2034696	1	TCAATTATACATGCAAACAAAGTCTCGAACCAATCCAACCACGTCTCGAATCAAGTAAAT[G/C]CATTTTCAATCTAGAACTTTCTCATAAACTATCACAATCATTTTCCGGTTTAGGCATTTC	Gh_A01G0207	intron	G	C					A01	2032820	2035398	-	AT4G15780	vesicle-associated membrane protein 724	O23429	VA724_ARATH Vesicle-associated membrane protein 724 OS=Arabidopsis thaliana GN=VAMP724 PE=2 SV=2
81	TM81	A1	2041292	0.915	GCAATCCTGGCCGTCCACGTGGCTTTTACAACTTCGTCTCCGACGTTCGATTTCTCCGGC[A/G]ACCATTTCCTCCCGATCAAATCGGAATGCAGCGGATCCATCGCTGAGTGCCTGATGCAAG	Gh_A01G0208	exon1	A	G	AAC	GAC	N	D	A01	2041193	2041570	+	AT4G15800	ralf-like 33	Q8L9P8	RLF33_ARATH Protein RALF-like 33 OS=Arabidopsis thaliana GN=RALFL33 PE=2 SV=1
82	TM82	A1	2051236	1	AATAAACCAGGGTTTGAGGTGGATGAGATTAAAGGTGGCGTTGATGGTGGAAGTATACTC[C/G]GGGTATGTTTTGGTTTGGGACGTCCTCTTTTTCTTCTTGTTCCATTCTTGTCTTTTACAG	Gh_A01G0210	exon6	C	G	CGG	GGG	R	G	A01	2049831	2052296	+	AT1G04170	eukaryotic translation initiation factor 2 gamma subunit	Q24208	IF2G_DROME Eukaryotic translation initiation factor 2 subunit 3 OS=Drosophila melanogaster GN=eIF-2gamma PE=2 SV=1
83	TM83	A1	2064099	0.965	TTTTCATGTGTTTGTAGAGTCTTTAGAAGGATCATTTACCTATACTCGTGTTCGGATATG[T/C]GTTAGATACAGGTTTCTTTATAGATTCTAGCATACCCCATTTGTTCTCGTCCTTTTTATC	Gh_A01G0211	intron	T	C					A01	2060968	2064365	+	AT4G15940	Fumarylacetoacetate (FAA) hydrolase family	Q86I22	FAHD1_DICDI Acylpyruvase FAHD1, mitochondrial OS=Dictyostelium discoideum GN=fahd1 PE=3 SV=1
84	TM84	A1	2118017	1	TTGAAAGTTAATTCCAGGAAGGAATCCCCAGTGTTCAATCCATCAAACAATCATCATTGT[C/G]ATAATGGGATTAAGCATAGGATTCAAAGAGAGACCCCTATTTTTGAACCTTCAGAGTATG	Gh_A01G0216	exon4	C	G	CAT	GAT	H	D	A01	2116743	2118244	+	AT3G06778	Chaperone DnaJ-domain superfamily protein	Q8TQR1	DNAJ_METAC Chaperone protein DnaJ OS=Methanosarcina acetivorans (strain ATCC 35395 / DSM 2834 / JCM 12185 / C2A) GN=dnaJ PE=3 SV=1
85	TM85	A1	2124674	1	AATGTCATGTTCTGCCAGTTTCTTTTGAACATAACAGGATCCGATGAATGATAATCAAGA[A/C]GGATGAGTAACCTCAGGAAGATCATGCTGGTGCATGATATGCAAAGGCATTTCGGTCGAA	Gh_A01G0217	utr	A	C					A01	2121327	2124479	+	AT3G16857	response regulator 1	Q940D0	ARR1_ARATH Two-component response regulator ARR1 OS=Arabidopsis thaliana GN=ARR1 PE=1 SV=2
86	TM86	A1	2193638	1	GTGTAGGATAAGTATACATCCAATACAAATATGTTATAACATTTAAGTTTTTCCATGTAT[C/T]TGGAAGGTCCTTGAAGGGTTATAAACTTATATGAAGGTACCCATATCCGAATATGGGCCA	Gh_A01G0225	intron	C	T					A01	2192968	2194495	-	AT3G06610	DNA-binding enhancer protein-related	Q9CR41	HYPK_MOUSE Huntingtin-interacting protein K OS=Mus musculus GN=Hypk PE=2 SV=2
87	TM87	A1	2197300	1	CCGTTGGCGAAACACGGGAAATAGATCGCGAACATCAATAAAGAAGCAAATGCAAGGTTT[A/G]TTGGAGACATATTTTGGAATGCTTTGAGGGGAAGAGGAGATTGCATGAGCCTTTTATTAG	Gh_A01G0226	exon1	A	G	ATA	ACA	I	T	A01	2195693	2197346	-	AT3G17060	Pectin lyase-like superfamily protein	Q9LSP1	PME67_ARATH Probable pectinesterase 67 OS=Arabidopsis thaliana GN=PME67 PE=2 SV=1
88	TM88	A1	2232873	0.976	CACTGTTGATACACATAGTTTGAACAGTGGATTTTTGGGCTCTTATATTCTTCTGACAGT[G/A]GCCTGCTTGAAATAGTCGCGGTGACGGCTTGAAGTTTGTGGTATTTTCGGAACTGTAATC			G	A
89	TM89	A1	2238735	0.996	ACATAAGTGACTAAAATATAATTTGAGACAAACAAAAATGACTATTATTAGTGTAACACC[C/T]TTATCCCGTAACCGTCACCGGAATAGGACGAGGCGTTACCAGAAAATTTGGAAGCAGATC	Gh_A01G0232	utr	C	T					A01	2237394	2237924	+	AT3G17152	Plant invertase/pectin methylesterase inhibitor superfamily protein	Q8GT41	PLA1_PLAAC Putative invertase inhibitor OS=Platanus acerifolia PE=1 SV=1
90	TM90	A1	2377299	0.935	CACTACAACTTTTATTAAAAATGGTTCGTCATGCTTCTCATGTGAGTAACCACTACATCA[C/T]ATCAAGATTTATTGAAGATTTTCTTCAATCACATCCCATAAAGTCTCTCAAGACTCTACC	Gh_A01G0246	utr	C	T					A01	2375340	2376647	-	AT3G14370	Protein kinase superfamily protein	A2YBX5	G11A_ORYSI Protein kinase G11A OS=Oryza sativa subsp. indica GN=OsI_021818 PE=2 SV=1
91	TM91	A1	2387042	0.813	GCATTGAGAACATAAAATAAATATGTATATATCTAAAGTAAATTCACATGCTAGCCAGAC[C/A]TTAGATGACAGTATATGGATTACATAAAGTAGTACTCTTTTGCATACATTAAAGGCCAGC	Gh_A01G0247	intron	C	A					A01	2384339	2388578	-	AT1G16680	Chaperone DnaJ-domain superfamily protein	Q6Y2X3	DJC14_HUMAN DnaJ homolog subfamily C member 14 OS=Homo sapiens GN=DNAJC14 PE=2 SV=2
92	TM92	A1	2393827	1	CTTGGGTACAAAGAAGACCAATCTTGAGGTACCTACAAGCCTCCTCCGCATCGAAATCAA[C/A]GTTCAGCAATTCGTCTACCAACCCGACCAGCTCCCTTTTCTCGTAAAGGTCCCATGTCTG	Gh_A01G0248	exon7	C	A	GTT	TTT	V	F	A01	2393495	2395851	-	AT1G16670	Protein kinase superfamily protein	C0LGH3	Y5614_ARATH Probable LRR receptor-like serine/threonine-protein kinase At1g56140 OS=Arabidopsis thaliana GN=At1g56140 PE=1 SV=2
93	TM93	A1	2435643	0.915	CTTACAGTATGAAGTTAACAGGTGGTGCTCGCGGACTCAACTCGCAGGCAACCTAGAACA[G/C]TATACGTGTTCAGGATTGAGAATCCATATTTTATACGACACAACATGATTTGTTCTTTTT			G	C
94	TM94	A1	2442626	0.996	TAGCAATCAACACATAGTAACCTGAATGTTCGGGTCTAAGTTCCAAAAGTTTCTCAGCTG[C/T]CCATTCTCCTATATCCGTATTTCCATGGATCCTGCAAGCACCCAAGAGAGTGCCCCACAT	Gh_A01G0252	exon1	C	T	GCA	ACA	A	T	A01	2442315	2444516	-	AT5G52850	Pentatricopeptide repeat (PPR) superfamily protein	Q9C9I6	PP116_ARATH Pentatricopeptide repeat-containing protein At1g71490 OS=Arabidopsis thaliana GN=PCMP-E67 PE=2 SV=1
95	TM95	A1	2445405	1	GGTGGCTTTGCTGAAAGAAATGAAGATACTAGTAGGGACGTGCAGGGAGAAATGGACTGA[A/G]CTATGGGCTTCAGCCCCAAAAATTTGCGTAAGCCCATCTTAAAGACATGGTATTTAAGCA	Gh_A01G0252	utr	A	G					A01	2442315	2444516	-	AT5G52850	Pentatricopeptide repeat (PPR) superfamily protein	Q9C9I6	PP116_ARATH Pentatricopeptide repeat-containing protein At1g71490 OS=Arabidopsis thaliana GN=PCMP-E67 PE=2 SV=1
96	TM96	A1	2448648	0.915	GGGCGTGTGGTTGGCCGTATGACCCAAGTCAGTGAGTTACAGGGGTAAGACACGGGCTTC[C/T]CATTTTGAATGTCCACACGGTCGGGCCACATGGGCGTGTGTCCCCTGTATTTTGAAAATT			C	T
97	TM97	A1	2461522	0.935	ACTCTTAAAAAGGGACCTTTGCTCCACTGATTAAGCATATTAAACATAAATTAATATCCC[A/G]AAAATATTAAAATGAGAGATAAGTACACATAATTGAGAACAAGAATCAAGTATTTATCAC			A	G
98	TM98	A1	2466636	0.868	AAACAACCTGCTTTCACTCAAACACCACAAATCACCCATGATGTTGAAAATAAGGTTTCA[T/C]TTAATGATGTAACTCTTACAAGCTTTGATGGTAGATAAAGATACAAATGACTTATTTTTA	Gh_A01G0253	exon2	T	C	TTT	CTT	F	L	A01	2465668	2466674	+	AT1G11300	protein serine/threonine kinases;protein kinases;ATP binding;sugar binding;kinases;carbohydrate binding	Q9LPZ9	SD113_ARATH G-type lectin S-receptor-like serine/threonine-protein kinase SD1-13 OS=Arabidopsis thaliana GN=SD113 PE=1 SV=2
99	TM99	A1	2477994	0.935	ACTTGCTAAGCAAACAAAATAGAATTGGGCTTGAAGGACAAAAGAAAGCAAAGAAAAAGC[G/A]AACTGAATGAAGAATTCTGATAATTTTTCATTAACAATGAAAGAAAGTTTGATGCCAATA			G	A
100	TM100	A1	2483785	0.988	GTAATAAACAATGGTGATTTTCGGAAAATACATGATCGATGAAATGACATTTTCCTTCTA[C/T]CAAGTCTTATGAACTGGATTATGTGTGCTGGGAACATTTGATGATGGAAAGGAAAGAGCA			C	T
101	TM101	A1	2488714	1	TATGGTTGGGTCGATTTTCTTCTATTCTCCCGATCTCTCGAGCTTTGGGCGATTACTTCA[A/T]TTTTCCCTCTCATTCAATCATTTTTCCTTTGGCCGAATATTGGTTGGTAGGCCTCTGTCT			A	T
102	TM102	A1	2494058	0.988	GATCGACTTGGATTTTGAAAATGAAAACAAAAAAAGGGAGTCGCCGCCAATCCCTTTTGA[C/T]GAGGTATGATCGGGTCACCTCGAAAAGTGGTTGTTTTTAATAATCTGTTTGATTTATCAA			C	T
103	TM103	A1	2496796	1	ATTTTTTCTGTGTGTTAAGGTTTTGGGCTGGTTTAGTGAGCTTAGGGTTTTAGTGTGTCA[G/A]GGCCGGGAAAATTGAGCTTGTAACATTTATTTCATTGTCATGATTCTGAGAAAGATATCA			G	A
105	TM105	A1	2507044	1	AAATCTTCAAGGTGGAGATTATTAGAATATACCCATTCCTTGCCCATACCGTGTCTATAC[A/C]TTTCCCATACCTACCCATACCTTGGAAAGGTCAAAGTTATGGGCACCAAATATTTATTTA			A	C
106	TM106	A1	2511583	0.935	AGAAGACATTTTTGCAAGCTATTCAGGTTCGAATCAAGAAAACTTGAATTCTACTAAGTA[A/G]CTATTGAGTTGAGTGATCATGAGCTAATCTTGAGAATCTTAATGCTTGAATTGAGTAGCT			A	G
107	TM107	A1	2515863	1	AAGCACCAGCTGCTGTTGATTCTCAAAGGTTATGGTCTTGAAGGGTTTGTCTTAGGCACT[G/A]CTCTTCCTCCTTCCCCTTTTCTACCTCGGACTGATGGTCAGCATGTTGATAATCCTGCGT			G	A
108	TM108	A1	2519895	0.935	TTGTCACTGATCAGATAATTGTAGCTAAAACTACCACTTATCACTTATCACTTGTCACTG[G/A]TCAGATAAGTGTAGCTAAAGCTACCACTTATCACTTGTCGCTTGTCGCTTGTCACTTATC			G	A
110	TM110	A1	2530174	1	TCAAAAATCAATGGCCCTTAAGACTAAGGCTCATGATACCAATTGTTGGCGATTTTTAGA[A/G]GAGGAGCAGAGGAAGAAATACAGGACAGAACAAGGCAATATTTTTACTTGCTCCCAAATG			A	G
111	TM111	A1	2545170	1	TTGATAAATTGCGTTAATTACCCAAGTATTATTAACCAAGTGTCTAAAATTGCAGATAAA[G/A]GCAAAAGTACTAAGGTCATTGCGATTACAACAGTAATTGCGGGCATAGTGGTTATTACAA			G	A
112	TM112	A1	2736138	0.935	TGCATGAATTGAGATTTTGACATGTTATTACACTTTCATTGAGATAAAATAATATTTCTA[G/A]AATATCACAAGGCGAAGTGAAGCAAACAAATACAAAAATAGTTCCGTCTTCAAAAAAAAA			G	A
113	TM113	A1	2740864	1	TTAATTAAAAATGAAAGGAAAAAAAAAAGAACAAACCTGCGAGAGAAAGGCGGCGAAAGA[C/A]AATAAAGAGACGAAGATTTTTGAGGGTGGAGCAAATGAGGGATTTATAGTCGATGAGATA	Gh_A01G0266	utr	C	A					A01	2737534	2740430	-	AT1G56070	Ribosomal protein S5/Elongation factor G/III/V family protein	O23755	EF2_BETVU Elongation factor 2 OS=Beta vulgaris PE=2 SV=1
114	TM114	A1	2746827	0.988	TCGGCTTAGGATGCTGATTCGACAATCTTTCTTTAGCTTAACCTACGCATAGAAACAACC[G/A]TACGCTGAGTATAAACTCAGTGGTATTTCTATAAACTAAATGCTTAATAGTATATAAAAA			G	A
115	TM115	A1	2749228	1	TAGCTTTTTCTTGCTACAATCTTTGGTGTCGCGACTTTCGTAGCTCGATGTTACAACAGG[C/A]ACTCCTATGTCATTCTCGGGGCTATTTTCAACTCGATCTTTGATGTTGCGACTGTCATGC			C	A
116	TM116	A1	2752485	1	AACCCATAACAAACAAAAAAAACCAACCCTAGAAACCCTAATGCTAGCCGCCCCTATGGT[T/C]TGTCACCACCACCTGCCACCACCCTTCTGACACCTCTGACGCCGTCTCAGCACCGCCCCA			T	C
117	TM117	A1	2755496	1	AAATCGAAACCACATTTAGTAAACCATACGAGTCACCTAACTAGAGCCATGCCGAACCTC[T/C]GTCCGTTAATAGTCACCAAAATAAGTACACGGGGGAAACACCACTTACCTTTCATTTCTT			T	C
118	TM118	A1	2764456	0.988	TACCTCGAAGTAAGCAAGGATGCAGTAGAATGTTCCTTCCGTTCTTTCGAATTCATCAAT[G/A]CTACGTTCGTAGCTGAAAGAATTAAGATTCCCATGCCTAAGCTGTCAAGGAATACCAAGA			G	A
119	TM119	A1	2771681	1	GAACCCGCCTCAGGATCTGCGTGTTTTTTACTGAATTGTCTATTTGCACATTAGGCCCTT[C/T]TGCTTTTTATGTTTTGCAATCAAGTTTCTATTTATTTTAATTTGGCCCCGAAATTCGTTA			C	T
120	TM120	A1	2784394	0.988	TGCTATTTATCACTCAACCGCCATCTCCTTTATATTCAATCCTTGGAATACTATTGTAAC[A/C]CTATAAATATTACAACTGACCTATATGCTTGTAGTAAAATCGTACTTTAAAAACTGTTTT			A	C
121	TM121	A1	2787541	0.899	TCATTTTATTAGCCTAGCAGTTAATTTAGGCATTAAATACCAATTCAGATATAATATAGA[A/G]TATATTTAAAGCACATGGATGATCAAACTGTAAACACATGTGTACCTCTTGCTTCGACAA	Gh_A01G0267	intron	A	G					A01	2786573	2788315	+	AT2G43000	NAC domain containing protein 42	Q9SK55	NAC42_ARATH Transcription factor JUNGBRUNNEN 1 OS=Arabidopsis thaliana GN=JUB1 PE=1 SV=1
122	TM122	A1	2923429	0.988	CAGGCACCGATCTTTACCTCTTACTTATAATGTCTACTGACCTTTTGTAGAGTAGGGTCT[C/G]TTTTTCATCTTGTTTTACCATCCTTAACAAATCAGGAGATAAGCTACAATCTCTGTCATC			C	G
123	TM123	A1	2929974	1	GTGGATCCGCCCTTCGGTTCTGTTATACAAGGTTGGAAATCAAGATTGGGGACCACTACT[T/C]GGGCTATGGGGAGAAATTGGATACGCTCCGTTAATGGTCCAGAGGCAATTTTCTTTACGA			T	C
125	TM125	A1	2949870	0.988	CAAAAGGACAGAAAATAATCAATTTTACTGCTTGACTCTCTTATTAGTCCCCAATGGAGT[C/A]GCCAAGCTGTCGAAAGCATTTTTATTTTGAAAACGGGGATCGACTTTAAAACGAAAATGG			C	A
126	TM126	A1	2956462	0.8	GAAATCAGCAAGCAAAGATCTTCCATGCACGTGTGCATAAAAAAGAACAATGAGGGATCC[A/G]ACATTAGAATCTTAAACAGAAAAGCATTGTTTATTTTTCATTCAAAGCATGCACATGCTT	Gh_A01G0268	intron	A	G					A01	2954062	2965731	-	AT1G16540	molybdenum cofactor sulfurase (LOS5) (ABA3)	Q9C5X8	MOCOS_ARATH Molybdenum cofactor sulfurase OS=Arabidopsis thaliana GN=ABA3 PE=1 SV=1
127	TM127	A1	2960918	1	AGTAAAATCAGCCGTAATTGAATGGGCAACAAAGGCAATGTCAACCAATCTAGATCTTTT[A/G]TGGCAGAAAGACTCACTCTTTTGAAAAAAACAGAAAACAAGAAAGAAGAGGGAAGTCCAA	Gh_A01G0268	intron	A	G					A01	2954062	2965731	-	AT1G16540	molybdenum cofactor sulfurase (LOS5) (ABA3)	Q9C5X8	MOCOS_ARATH Molybdenum cofactor sulfurase OS=Arabidopsis thaliana GN=ABA3 PE=1 SV=1
128	TM128	A1	2963484	0.988	CCTGAACTCTTATCCATTGAATCCTTTTAATAAAGCTTATTTATAAATGCACTAACCAAG[C/G]GTTCATATCTTGGGATAAGGCTCCCCTACATTACTTTTCTATCTATTACTTTCCAGCACA	Gh_A01G0268	intron	C	G					A01	2954062	2965731	-	AT1G16540	molybdenum cofactor sulfurase (LOS5) (ABA3)	Q9C5X8	MOCOS_ARATH Molybdenum cofactor sulfurase OS=Arabidopsis thaliana GN=ABA3 PE=1 SV=1
129	TM129	A1	2967649	0.949	CTGGCCACCGTTCATGGTGTTGTAACACCCCAAACCCGGACCAGACGTTATGGTCGGATC[T/C]GACATGCTACATCGAAGCATTCAAAACATTTTATATTATTGGTCCAGAAAAACTTATTTA			T	C
130	TM130	A1	2970832	1	ATCGTTCAACTATTTTTCCTTAATCTGATCCAACCAGGTTGGCCTCACTTGCAACTCAGC[T/C]AACAGGCTTCCATCATCATACAGACTCAGACGAGCAAACATTGCTCTCAGATCAGATACA			T	C
131	TM131	A1	2972933	1	AGTGGGTATGTGTTCAGAAGACGAAGTTCCAACTTGAGTACTACCTCGGCCTCGACCACG[A/G]CCTCTTCCCCCAGTAGCTCTCGTACTCATATCGATTTATCTTGATTACCAATTTTTATGC			A	G
133	TM133	A1	3239317	1	TTGGAGGAGTAGAAGAAGGTGATGGTGGAAAAGCTGGTAATTGTTGCTTAGGCAAATGAA[G/A]AATTGAATGGGTTTGCAAAGAACATGAAATGTAGCGCTTTTTAAAACCAATACAAGAAGA	Gh_A01G0280	exon1	G	A	CTT	TTT	L	F	A01	3237677	3239470	-	AT3G14440	nine-cis-epoxycarotenoid dioxygenase 3	Q9M6E8	NCED1_PHAVU 9-cis-epoxycarotenoid dioxygenase NCED1, chloroplastic OS=Phaseolus vulgaris GN=NCED1 PE=2 SV=1
134	TM134	A1	3249634	1	TTAGATTAATCATATTTAGTTGCTTATTCTGCTAGTTGATTAATATTCTCATTCATCAAG[T/C]ATCGTATCTCATGTGTGCCTGTTACCTCATATCGTCGTTTTCTACTTGGTTTATCAAATG			T	C
135	TM135	A1	3252158	0.988	ATTTATTTCTTTGTTGTAATAACTAACAACATGAGCATGCCATCATAATGCAACCTGTCG[G/A]GAAATCCAACATTTTTCTCCATCAATTGTTCGCATTCGTTTTTCATCATCAATCCAATAT			G	A
136	TM136	A1	3256929	1	AAAAAACATTGTTGAAATGCATGCATTTGAATACATTGATTTCTTACTTGCTTGATTTCC[A/G]GTGGATGAATGAGATTGTCAAAGCTTTGTACCCTAACATTAGGGGTGTAAATGAGGCACT			A	G
137	TM137	A1	3296553	0.996	CACAAACACACATAATAACAATCATCTGTTTTTAAAGGATTCTTTCAAGTCAAGCAATTT[A/T]ATGTGTCTAATTCATGTCGGCTTTAGCACGCCGACTTTCAAGCTCCACGGTCCGATGAGG			A	T
138	TM138	A1	3300196	1	CCTTCAGGCTTTGGACCATGAGAGCACCAACAATCACTAGGAGATAGCAATTAAATGGTT[T/A]GTTGGAGAGGTTGTATATTGAGCCCTTATGCTGGCATTATCATGCAAAGACAGTAGGAGA			T	A
139	TM139	A1	3308928	1	AGGTACATCCAGTCTCAATGAGCCAAGTGATGTCCGAGGATGCATACATCTTATTTTACA[C/T]GAGGTAGATGCCTATTATTTCTATTGTACCTGCGAAATGTATTCCTTTTCTGTTTCTAGC	Gh_A01G0281	exon12	C	T	ACG	ATG	T	M	A01	3305093	3309725	+	AT1G17110	ubiquitin-specific protease 15	Q9FPS9	UBP15_ARATH Ubiquitin carboxyl-terminal hydrolase 15 OS=Arabidopsis thaliana GN=UBP15 PE=2 SV=2
140	TM140	A1	3311403	0.714	TTAACAACAGATGATTATAAAAAAATGCTAGACTTAAACACCAATACACATCAAATCTAA[G/T]TTTTCTTTGAAATTTTCATATGAATTTATCATTTATAACTAACACCTTGTAAACTCAACT	Gh_A01G0282	intron	G	T					A01	3310806	3312464	-	AT1G17100	SOUL heme-binding family protein	Q9Y5Z4	HEBP2_HUMAN Heme-binding protein 2 OS=Homo sapiens GN=HEBP2 PE=1 SV=1
141	TM141	A1	3318770	0.996	TTCAAAACAAAAACAGATTAAGAAGTCAACTAAGAGCTACCCACCTTTAAAAGAAACTAT[T/C]AGTGGTCAGTGGTGTTTCAACGATGATATGCACCGTCATCTGTCCATCACAAATTGTGAA			T	C
142	TM142	A1	3320882	0.965	GTATTTTTCCTTTGAATGAGAATTCAACAACCAATGACGTGATTAAAGGAGAAAGTGAGC[T/C]ACCGCTACATTATATCTCGTAGTTAATTTATAATATTTTCATTTCTAAACTTTAAAATGT			T	C
143	TM143	A1	3323982	0.9	TTCAAATTGCTCAAGCTTCTTAGAGTTCAATGGACCAACACCTTCAACAAGAAGAATTGG[T/A]TGAGATCATTGAAAAACAATGAACTCTTACCTTTCAATTTCATTATGTTTTTTGACATTA			T	A
144	TM144	A1	3332830	0.949	GGGAGAAAGCCCAATGACCGTGCCTCGGATGCTCAAACTTGCGATGAGGCATGCTTATTC[G/A]CTAACAAGAAAGCTGCAAAATTCAACTGAACTCAATTTGTCTCTTAACGTAAGCTATAAG			G	A
146	TM146	A1	3342434	0.988	AGTTTAATGAAAATTATCATCATTTTTCATTCAAAATATTCTCCATCTTTCTTTGCTTTT[A/G]CTCATTTTTGTTCTTGAGTCTTGGTTGTTTTTTCAGTAAGTCTCGAGCCTTGCTGCTCAA			A	G
147	TM147	A1	3346974	0.996	TCAAAATATTCTCAATGCTTCTTTCCTTTTGTTCATTTTTGTTCTTGAGTCTTGGTTGTT[C/T]CTTCAGCAAGTCTCGAGCCTTGCTGCTCAAGCTTTAGCTGAATCTTGCTTCCACTTGTTC			C	T
148	TM148	A1	3350426	1	TGAAACATCAATGGAGGTTTATAGCGGTGAGAACTCTAATGACGAGGGAAGTATGTCGTT[G/T]GATGTTGTTACTATAACCAATTTTAATGTCGTTTAAGATTGGAAACATTTGCTTTCATTA			G	T
150	TM150	A1	3387012	1	TCACTTTGTGCGAGAAGTCTTTGAAAAAGGAAAAATTCTACTTCAGAAGATTGGGTTTTA[G/A]CGTGCAAGGAGATTAGGGAATTATTATCGAGGAGTTAATGAGGATCGATGGCATATGATC			G	A
151	TM151	A1	3390605	1	AATAAGCTATCTCAGGGTTTTTACCTTTCATGGTATGAGAACCCATACTTGGAACTTTCT[A/G]GGTAAGTTTCTACTAGTATTTAAGTTATATACCCTTAAGTTGAATATGATTAACTTTCTT	Gh_A01G0283	exon2	A	G	AGA	GGA	R	G	A01	3389900	3392295	+	AT1G11300	protein serine/threonine kinases;protein kinases;ATP binding;sugar binding;kinases;carbohydrate binding	Q3ECH2	Y1670_ARATH Probable receptor-like protein kinase At1g67000 OS=Arabidopsis thaliana GN=At1g67000 PE=2 SV=2
152	TM152	A1	3412620	1	ATGCGAGCTGTCTTGTGAACTGACATGCTCCAAACTAGAGGGGCAAACTGACTTTGCAAG[A/G]TGAGATGCTCCAAATGTTTTTAATACACGTTGGTAATATTTTTCATATATAAGGCTGCAT			A	G
153	TM153	A1	3415837	1	CGATCGACTTCGATAACACTCCCATTGCCGATCCAACACCTGACGCACAATAAACAAAAG[T/C]GATGGGCGATCAAACAATCCGCGAGTTAGCGGCGGCTCCTGCGGAACAACAACCCCTTTG			T	C
154	TM154	A1	3426068	0.988	CAAAGTCAACTTTCCATTTTCCACGTGTTCATGGATTATACAATATAAAATGCTACCACC[A/G]GCAATAAAGTAAACAGAGAGTTTGGTTTGGTTTCGACGTGTTCATGGATTAAATTGTCTG			A	G
155	TM155	A1	3527068	0.988	CCTATAGCTTTTCTTTGATATCCAACGTAGACATGTTTGTTATATTATAAATCAAATTGG[A/T]ACTTCGGCTTCCACAATGCAAAATTGATGGAAATCAGATGCAATGGTATGTCCATTTAAA			A	T
156	TM156	A1	3594960	0.988	TTTTCATTTGTTTTTGCTTTTTATTATTCCTTTATGCATTCTAACACTTTATTGTTTCTT[G/A]TGTTAGTAGGTTAAAACATGTTGCACATTCCTTCCTCCGTGCAATAGAATTCTTTGATGT			G	A
157	TM157	A1	3660917	0.858	GTGGGTGGAGAGAAACTTGAAGTTTTGAAAACTATGTTAACCAGTTTAGTTATCGAGGTT[C/T]GTAATACTGGTAAAGGTGGGGGTATATTGAATGATGGGGTTGGTGCTGATTACGTACAGA	Gh_A01G0288	exon5	C	T	CGT	TGT	R	C	A01	3659316	3662936	+	AT5G18070	phosphoglucosamine mutase-related	P57750	AGM1_ARATH Phosphoacetylglucosamine mutase OS=Arabidopsis thaliana GN=DRT101 PE=1 SV=1
158	TM158	A1	3666566	0.988	TGTTATGCTTAAGTTTTTAAGATAATTTTCTCTAATGCTTCCACATTCAGTAGCCATTGA[C/T]TAGTACTGATTAATACATTTTGCAGGGTGGAAGTTCACAGCAACTCTACAAGTCAGTGCA	Gh_A01G0289	intron	C	T					A01	3664665	3667569	+	AT1G53580	glyoxalase II 3	Q9C8L4	ETHE1_ARATH Persulfide dioxygenase ETHE1 homolog, mitochondrial OS=Arabidopsis thaliana GN=GLY3 PE=1 SV=3
159	TM159	A1	3669745	1	CTGGCTGTCATACTTAGATGGTCTTTCATTTTGCTACTTGTTAAACCATACCACTTTCAC[A/G]TTCATACTTGAAATGGCTGGGATTTAGTGCCATTCTACTTAGCAGCCTCGTGTAATACAC	Gh_A01G0290	intron	A	G					A01	3668352	3673723	+	AT3G14690	cytochrome P450, family 72, subfamily A, polypeptide 15	Q05047	C72A1_CATRO Secologanin synthase OS=Catharanthus roseus GN=CYP72A1 PE=2 SV=1
160	TM160	A1	3673295	1	TCAATGAGGTCGACAACTCAAAAACTTGGTTTTTTTGTTTCGCTAATTCTACAGGTAACA[A/G]TGATATTGTACGAGGTTCTAAGGTTGTACCCACCAGTGGTTGAGCTAGGACGTTCCGTTC	Gh_A01G0290	exon8	A	G	ATG	GTG	M	V	A01	3668352	3673723	+	AT3G14690	cytochrome P450, family 72, subfamily A, polypeptide 15	Q05047	C72A1_CATRO Secologanin synthase OS=Catharanthus roseus GN=CYP72A1 PE=2 SV=1
162	TM162	A1	3684502	1	CCCACACGGGCGTGTCCCTATCCACACGGGCGTGTGGCCCTGTTTCATGATAATTTTTTT[A/T]AAAATTTTCTAAAAGCTCTGAAAGTTCTTAGTTTGGTCCCGATCTATCTCCAACATATAT			A	T
163	TM163	A1	3703364	0.935	TGGAGGGGTTTTTCCATGTTAAATTTGTGTGTTCATTTTCTCAATTTATTCTGCTATTTT[T/C]TTGTTCGTTACTTAATCGAGTTAAAATCCTAACAGAACACCTAGGTGAATTTTCATTTTT			T	C
164	TM164	A1	3756188	1	TCTAAGTTTTGTTATGGAAAATGTAATGTTTCTGTTCGTTCGACGATGTCATCTCTACTT[A/C]TATTACCCATGTCAAACAAGTCTCTAGGGGTGTTCTGGAGTACAACATACCAACCCTCAT			A	C
165	TM165	A1	3761614	1	GGAAGATTAATTTTTCCAAAATCATCATGATAAAACTATTATTGATGAGAATTTTGAATT[G/A]AAACGTATCTTAGTAATTTCAACAAGCTGGTCTACTCCACTCTCACTAGGAAACAGAGGC			G	A
166	TM166	A1	3764517	0.915	TTTTTAATAAATGGTTTGATTTATTTAAACAACAATTTTGGTCTACGCAAATCAAGAAAA[C/T]AGGTTCGGGAGTTGATTACGCACGAGGAAGGATTAGCACCCTCGATACGCCCAAAATTGG			C	T
167	TM167	A1	3784175	0.965	TAAAATGTAGGCCAAATCCAACGGCCTATAATAATTTATCATGCTGGGAAATAAAATTCC[A/G]ACATTGCCCTGCAATCGTTTAAATATAAGGGCTAGTTTAGCATTGCTTTTAAAAAGTACT			A	G
169	TM169	A1	3855737	0.996	CCGATTGAATGAAAGGAAAATTCGATGGATCTCTGAAAAGGAATTGACGTTAGAAAGGAT[T/C]TAGCCTGGACGGGTGATCCTAACCTGATATAGCCCTCCCGAAGAATATATGGAAATTGGA			T	C
170	TM170	A1	3861047	1	GGTTGTGTTCAGTTGAAGATTGTAAAGGGATAGAATCCGTGCTGGACTTGTCATCATCTT[C/T]CTCGCTATGCAGCTCATTTGAGAAGCTTGAGTACTTGTGGCTTAAAAGGTTGGATAACTT			C	T
171	TM171	A1	3869270	1	AAGAAAGAGGAAGAAAGGCATGAAGGAAAAGGAACAAAAGCTCGCATGGAATTCAGTCTT[T/C]CCAAACTAAAGAAGTTAGTATTGAAAAACTTACCAATGCTGAAGAGCTTATGCAGTTCAA			T	C
172	TM172	A1	3872924	0.976	TGGGGGAGTAAGGATGGGGATTGGTAAGATAGCTGAGTATGAGGTGAGGGAGTTGGGCAA[G/A]GAGAAGGGCTTAGTTGATTGTTTTAGAATTAAGTTAAAAGAGGGACAAGCTGGGTTTCAG	Gh_A01G0301	exon1	G	A	AAG	AAA	K	K	A01	3872877	3963226	+	0	0	0	0
173	TM173	A1	3877821	0.813	TTCTCTAGACATGTTTGACTAATAGAGCACAATTACATCACAATTTATAAGTCATGTTTC[A/G]TGATACAAGTTGTAATTAAAAAATATTAATTGCTATAAAAAATTGTCAGCACTATAAAAG	Gh_A01G0301	intron	A	G					A01	3872877	3963226	+	0	0	0	0
174	TM174	A1	3882315	0.899	GCAAAAGAATGAATACTTAGAAAGAATTTCAGAATCATCCTTTCAGCATATGCATAGACT[C/A]AGCATGCTTGATCTTTCTTATACCAATGTTGAGCAACTACCAAATTCTGTGTCAAACTTG	Gh_A01G0301	intron	C	A					A01	3872877	3963226	+	0	0	0	0
175	TM175	A1	3889622	0.787	CTCCTCTCTCCTCCACCACCCACCGCTGATTTCTCAGCCACCATGGTGAGAACCCGAAGC[T/C]GAACCGCCGTTGTACACGTCACCCACCCCGTCTCCACCTCTTGCCGCTTCGCCATCTTCT	Gh_A01G0301	intron	T	C					A01	3872877	3963226	+	0	0	0	0
176	TM176	A1	3895950	0.965	CCCAATGATTAGACTTGCTCTAGAACCCTTGAGATTCTCATTATGACATCAATGATTTGA[C/A]TGAATGAGCAGCCCTTTTTTCTTCTTTATTTTGTAAATATGTTTTCCAATGTGGTATTCT	Gh_A01G0301	intron	C	A					A01	3872877	3963226	+	0	0	0	0
177	TM177	A1	3910583	0.858	CCCTCCCTTCAAAACGGCGCCGTTTGCATAGGTATTAAAATGAAATGAAAATAAAATTCT[G/A]GGGGAGAAATTAAAGTAAGAAAAAAATGGATTGAAACACAATAAAAATGCGGAAAGACCG	Gh_A01G0301	intron	G	A					A01	3872877	3963226	+	0	0	0	0
179	TM179	A1	3937312	0.988	CCAAGGGTGGAATTAATAGAATACTGGATAGACGAGGGATTTCTTGAAATGGGGAGTCGA[C/A]AACAATTGCATGATAGGGGTCACACTATATTAAATAGGCTGATAAACAACTGTTTGTTGG	Gh_A01G0301	intron	C	A					A01	3872877	3963226	+	0	0	0	0
180	TM180	A1	3949555	0.988	GGTCACTGTTTCAAAGGAACTCAACATTCCCAAATTACAGGAAAAACTTGCAAATGCGCT[G/A]AATATTGTTGATCTTCCAAAATCTGAACCAGAGCGTGTAGCAGAACTAATGGAGAAATTG	Gh_A01G0301	intron	G	A					A01	3872877	3963226	+	0	0	0	0
181	TM181	A1	3952675	1	CACTTTTCCAAGACACAGACCAATCAGTTCCTTCTGCTCATCCTTTTAAGGTAATCTGCA[G/T]ACATCCAAAAAAGTGGTGGGAATCAGTAGAGTGGGAATATCCAAATGCTAAGGAGGTTCT	Gh_A01G0301	intron	G	T					A01	3872877	3963226	+	0	0	0	0
182	TM182	A1	3969754	0.976	GGGTCTGTTCAGTTGAAGATTGTAAAGGGATAGAATCCATTCTCGACTCGTCATTGTCGA[A/G]CTCGCTGTGCAGTCCACTTGAGAACCTTGAGTACTTGTGGCTTGAAAGGTTGGATAATTT			A	G
183	TM183	A1	3993881	0.996	TGAAGTGGTCCTTGCATGTATGTTTTAAACCATGAAATGCCATATTCTTTTCAAGTGTAC[A/G]TACTGTGCGAATGCTTGATAACGGAAAGGGGCCTCTGGCATTGCAGTTAAATGCTGAAAA	Gh_A01G0305	utr	A	G					A01	3992054	3993529	+	AT3G02660	Tyrosyl-tRNA synthetase, class Ib, bacterial/mitochondrial	Q6MC06	SYY_PARUW Tyrosine--tRNA ligase OS=Protochlamydia amoebophila (strain UWE25) GN=tyrS PE=3 SV=1
184	TM184	A1	3996263	1	AGGTTGTGGAACAAGTGAGGCTTTCTAAGATGGAGTGGAAGAGTGAGCATGTAAAAGATG[C/T]CAGCCCAATCAAGCTTTTGATCTTCAGACACGACAAAACTTTGCCCAAATCCTTCAACTT	Gh_A01G0306	exon2	C	T	GGC	GAC	G	D	A01	3995085	3996961	-	AT1G17010	2-oxoglutarate (2OG) and Fe(II)-dependent oxygenase superfamily protein	Q39224	SRG1_ARATH Protein SRG1 OS=Arabidopsis thaliana GN=SRG1 PE=2 SV=1
185	TM185	A1	4002435	0.988	CCAAATTCACACACACATATATTTATCTTTCGTTTTACTAATCATGATCATGGCTTAGAA[T/C]TGTCCCTTCCAACAATACCGTTTCTAAGGTTTGAACACATGTTCTCTTTTTAGGAGTACA	Gh_A01G0307	intron	T	C					A01	4000562	4004281	-	AT1G17020	senescence-related gene 1	Q39224	SRG1_ARATH Protein SRG1 OS=Arabidopsis thaliana GN=SRG1 PE=2 SV=1
186	TM186	A1	4008256	0.996	TGCTCCACTACAACTTCAGGGAGATAAGATTCGCCACTTCAACCTGCTCCAGTGCAACTT[T/C]AGGGAGATAAGGTTTGTGGTTCTAACCTGCTCCGCTGTAACTTCAGGGAGATAAGATTTG			T	C
187	TM187	A1	4022659	0.988	GGAGACATATGAATAATGTGGGACACTGTCCTAGATGTGATGAGGTGTTGGAGTTAGGAC[T/C]CCATGCTATTAGGGACTATCATTTCTCAAGAACAATATGGCAGTTTATGGTGCCAAAACA			T	C
188	TM188	A1	4031535	1	AACCAGATATTAACTCTTTAGGCATAGCAAGGGCACCACGAAGATCATCTAGAGTAAGAG[T/C]CATACCCATACCAAGCATAGTAAGAGTAAGACCAAAAATAGTCCAACTGGGGGTAACCCA	Gh_A01G0308	exon3	T	C	ACT	GCT	T	A	A01	4029556	4035035	-	AT1G78560	Sodium Bile acid symporter family	Q93YR2	BASS1_ARATH Probable sodium/metabolite cotransporter BASS1, chloroplastic OS=Arabidopsis thaliana GN=BASS1 PE=2 SV=1
189	TM189	A1	4053413	0.935	CAATTCAAATAAGACATTGCATTATTATTATCACACGAACTTACCTCGAATGCAAAAACG[G/A]CTAATTATTCTCTTTTTGTCCTTAACCACGTACTTTCTCGATTTAAGCTCGAATCTTGAT			G	A
190	TM190	A1	4059437	0.949	TCACCCGAGAATGCTGATGATACCGGGCGGAAGGCACTTTGATTTCGAAGAACCGAACCG[A/T]ATGTCACACGTAAATGTTCCTAAATTGCCAAATGGCAAATCCAAACTTTAAATGCAATGG	Gh_A01G0310	exon1	A	T	CGA	CGT	R	R	A01	4058373	4059488	+	AT1G78570	rhamnose biosynthesis 1	Q9SYM5	RHM1_ARATH Probable rhamnose biosynthetic enzyme 1 OS=Arabidopsis thaliana GN=RHM1 PE=1 SV=1
191	TM191	A1	4124777	0.965	CAATTCCATCAAAGAATTGTATTTGTACTCAAGGGCAAAAAAATATGGCAACGTCTTCAC[G/C]CATTATATCAGTTTTACTTGTGTTTAGAACAGTTTTCAGCTCGTGTAAGTGCATCTGTAA	Gh_A01G0312	utr	G	C					A01	4124791	4126190	-	AT2G04340	0	0	0
192	TM192	A1	4129965	1	CAAACAATCATACCAGTATCAATAATCTATTGCCAGACCGCAAGTAACGTTCCACTGCAT[C/T]ATTCTGTGGAAGCTCAGGAGGCTCTTTGCTTGTCCTTAGCTGTGCTTCAACAACGGTATC	Gh_A01G0313	exon11	C	T	GAT	AAT	D	N	A01	4127905	4137368	-	AT1G78580	trehalose-6-phosphate synthase	Q9SYM4	TPS1_ARATH Alpha,alpha-trehalose-phosphate synthase [UDP-forming] 1 OS=Arabidopsis thaliana GN=TPS1 PE=1 SV=1
193	TM193	A1	4154040	0.988	GCTATGAATTCCACTATTGTAAGTGAAGTCATTCCATACATAAGTCACATACCCAACACA[C/G]CAACTTTTAGTTTCGAGGTCAATGGAACACAAGTTTTCGATATAGCAAAGTATATGAGTT			C	G
194	TM194	A1	4187768	0.988	CATTCTAGGCCTTTTTGTTCCAGCTAATGCCAAAGCAAATGCTAAATCATTTTTGTGCTT[T/C]TCAGCCTTCGAGAAGGAAACATTACCTACTCTATCCATTCTGTTTTTGATATCCTTGAAG			T	C
195	TM195	A1	4190004	1	TGACCCTAATTCTCTTTGATTGAAGGCAAATTAGCAACACCATCATTACGTTAGAGATGA[T/C]GCAGTCCCCTAAATTGTAGGGTTGGAATAGTGTGTAATCCCTCAATGTAGAATCTTGCCC	Gh_A01G0315	utr	T	C					A01	4190792	4204783	-	AT4G27190	NB-ARC domain-containing disease resistance protein	Q9T048	DRL27_ARATH Disease resistance protein At4g27190 OS=Arabidopsis thaliana GN=At4g27190 PE=2 SV=1
196	TM196	A1	4199686	0.988	CGTCAATTCATCACAGAAGCTTATGTCAAGTTTTTCTAAGAGTATGAGACTTTGACCAAG[G/A]GAAAGTGAAAAGAGTGATTTCAAACGTGAGCACCGTTCTATAGTCAATTCAACTAAGCTT	Gh_A01G0315	intron	G	A					A01	4190792	4204783	-	AT4G27190	NB-ARC domain-containing disease resistance protein	Q9T048	DRL27_ARATH Disease resistance protein At4g27190 OS=Arabidopsis thaliana GN=At4g27190 PE=2 SV=1
197	TM197	A1	4204488	1	TTGCCTAACTGATATCGCCAGCACCAATTAGGACACAAACGGAAGCATCTCTTATTTTCT[C/T]CAACTCTACTGTCCAAATTCTGTACATCTTTCAAGGCATTTTCCACATTTGTCAGCCATT	Gh_A01G0315	exon1	C	T	GGA	GAA	G	E	A01	4190792	4204783	-	AT4G27190	NB-ARC domain-containing disease resistance protein	Q9T048	DRL27_ARATH Disease resistance protein At4g27190 OS=Arabidopsis thaliana GN=At4g27190 PE=2 SV=1
198	TM198	A1	4212455	0.988	AAATAAGAGAATTTATGGCATCGAAATTTGGTTTGAAATTTTGGTCCCTAATTGTATAGG[G/A]ACTTTGCAAGTTGACCCTTGAACCTCAACTATAAATAGGCCTAACCATTTCTCATTTTCT			G	A
199	TM199	A1	4216334	1	TATTGCAAGATCAAAAAGGTTCAAAAACTTTTTTGGGTCCGATTGAAAACAAAGCGAACA[G/A]GAGATAGAACCTTCCATAATCAGGAATTCCACATCCAGTGCTAATTTCAGCTCCAGTCAA			G	A
200	TM200	A1	4218658	1	ATGTTTCTTCAGGATATTACTTTGGCATATCTGGAAAAAAATTAGAATTTGATCATTTTC[C/T]AAGGCAAACCAATGAATCTAGATGATTGTTGCGCGGAAGCGTGTGAAAGAGTAAAATTAT			C	T
201	TM201	A1	4222360	0.965	GGCAAGGAATGGGTATATTCTAATAATGAAATTATTAAGGTGTCTTACAACTTGGCTAAT[A/C]AATAGTCTTTAATGCATAAAGAAGCTTTATTGTCGGGCTTGCAGTGTCAATCTGAACAAA	Gh_A01G0316	utr	A	C					A01	4223353	4318777	-	AT4G19050	NB-ARC domain-containing disease resistance protein	P0CB16	DRL25_ARATH Putative disease resistance protein At4g19050 OS=Arabidopsis thaliana GN=At4g19050 PE=3 SV=2
202	TM202	A1	4232780	0.988	TCAAGTTTTTCCAAGAGTACGAGACTTTGAGCAAGCGAATGTGAAAAGAGTGATTTCAAA[T/C]GTCGGCAGTGTAGTATAGTCAATTCAACTAAGCTTTCAAGTCTTACATGTTGGGTTGGCA	Gh_A01G0316	intron	T	C					A01	4223353	4318777	-	AT4G19050	NB-ARC domain-containing disease resistance protein	P0CB16	DRL25_ARATH Putative disease resistance protein At4g19050 OS=Arabidopsis thaliana GN=At4g19050 PE=3 SV=2
203	TM203	A1	4236314	0.899	CATCTTGTCCTTCAAATGTTCATAACTGATCTTAAGAGAAATGTAGGCATTTTTCTCTCT[T/C]TCTGTTTGAATGCTTGGAATCTCCATTAATCCACTTCTTTCAAGTTTTTTTTTTGTGCAT	Gh_A01G0316	intron	T	C					A01	4223353	4318777	-	AT4G19050	NB-ARC domain-containing disease resistance protein	P0CB16	DRL25_ARATH Putative disease resistance protein At4g19050 OS=Arabidopsis thaliana GN=At4g19050 PE=3 SV=2
204	TM204	A1	4250859	1	CAAAACGACGTCGTTTTATATGAGCTTCAATGACATTAGCGGCGCTTTCCTAAAAACGCC[G/A]CAATAGCTCGCACTTTAGTGGCATTTTTCTAAAAAACGCCGCTATAGGTCGCATAATTAG	Gh_A01G0316	intron	G	A					A01	4223353	4318777	-	AT4G19050	NB-ARC domain-containing disease resistance protein	P0CB16	DRL25_ARATH Putative disease resistance protein At4g19050 OS=Arabidopsis thaliana GN=At4g19050 PE=3 SV=2
205	TM205	A1	4260969	1	TCGGTTTCACCAGCCATATTCAATAGAATTATGGCTTTTGGATCAACGAAGGAGATATGC[A/C]CTACAGCAGAATAGACTTTTAGCGGCGTTTTCAGCGGCGTTTGGATGAAAAACGCCGCAA	Gh_A01G0316	intron	A	C					A01	4223353	4318777	-	AT4G19050	NB-ARC domain-containing disease resistance protein	P0CB16	DRL25_ARATH Putative disease resistance protein At4g19050 OS=Arabidopsis thaliana GN=At4g19050 PE=3 SV=2
206	TM206	A1	4263178	1	CCCTAAAACAAAAAACACCACTTTCTTTTTCCCCAAATCATCCCCTAATTCCCTAAACCC[G/A]AAATCCCTAACATTTTCCCCAAATCCCATTTTTTCCCTAAATCTATTTTCCCATCCCCAA	Gh_A01G0316	intron	G	A					A01	4223353	4318777	-	AT4G19050	NB-ARC domain-containing disease resistance protein	P0CB16	DRL25_ARATH Putative disease resistance protein At4g19050 OS=Arabidopsis thaliana GN=At4g19050 PE=3 SV=2
207	TM207	A1	4277830	1	CCTATCATGGTGTTGAACTCCATCTTGTTCATTTGGCATACCGAATACTTGCTTTAATTC[A/T]TCACAATAAGAAACCGAAAGCAATGCAAGAGCAGGAAGACCTTGAGCCAAATTGATTGGC	Gh_A01G0316	intron	A	T					A01	4223353	4318777	-	AT4G19050	NB-ARC domain-containing disease resistance protein	P0CB16	DRL25_ARATH Putative disease resistance protein At4g19050 OS=Arabidopsis thaliana GN=At4g19050 PE=3 SV=2
208	TM208	A1	4283876	0.988	AGATAACCTTTGAATGACATTAGGGGGAAAGATCCATTTAAGTCCAAAATTGGTTAAATC[T/C]AATACCTTCAGATTTTCCAACCTCCCTAATTCATCTTCCAAACCCTCAAAGTTTGAACCA	Gh_A01G0316	intron	T	C					A01	4223353	4318777	-	AT4G19050	NB-ARC domain-containing disease resistance protein	P0CB16	DRL25_ARATH Putative disease resistance protein At4g19050 OS=Arabidopsis thaliana GN=At4g19050 PE=3 SV=2
209	TM209	A1	4286755	0.935	ATTCTAATCATGACTAAACAAATGGAGCATCCCCGATTTTATCTGAAAACTTTTATCTAC[A/G]AGAAATTATGGATTCTCAAATCAAACGGTAGCTCATCTGCACTTATGAAAAATAGGATGA	Gh_A01G0316	intron	A	G					A01	4223353	4318777	-	AT4G19050	NB-ARC domain-containing disease resistance protein	P0CB16	DRL25_ARATH Putative disease resistance protein At4g19050 OS=Arabidopsis thaliana GN=At4g19050 PE=3 SV=2
210	TM210	A1	4289344	0.858	GTCATAATTGCTTATAGGTTTCATGATTTGAGATTTAGGATTTCACAAATTATTCATTTA[G/A]GATGCATTTTACGAGTAATTAGGAAATCTTGTAATTTGCAAGTTTACTGTTTATAAATAT	Gh_A01G0316	intron	G	A					A01	4223353	4318777	-	AT4G19050	NB-ARC domain-containing disease resistance protein	P0CB16	DRL25_ARATH Putative disease resistance protein At4g19050 OS=Arabidopsis thaliana GN=At4g19050 PE=3 SV=2
211	TM211	A1	4292799	0.988	TATAAAGCACACAATAAGAAGCACTTCTGGTTCGTCTCTTTCTTCAAATGCTCGTAACTT[T/A]TCTTGATACACAAGTAGGCATTTTTTTCTTCTTCTCCAATGTTACCGATTTCCACTAATC	Gh_A01G0316	intron	T	A					A01	4223353	4318777	-	AT4G19050	NB-ARC domain-containing disease resistance protein	P0CB16	DRL25_ARATH Putative disease resistance protein At4g19050 OS=Arabidopsis thaliana GN=At4g19050 PE=3 SV=2
212	TM212	A1	4306390	0.813	AGTAACTATCTGTTAACAGACTCATAACAATTAACTCAACTTCAACTAACTATTTTGACT[T/A]GTTTATACAATTAATATTTCTTTCATTTCATAACATGGCCCATGCTTCTCGACTTTCACT	Gh_A01G0316	intron	T	A					A01	4223353	4318777	-	AT4G19050	NB-ARC domain-containing disease resistance protein	P0CB16	DRL25_ARATH Putative disease resistance protein At4g19050 OS=Arabidopsis thaliana GN=At4g19050 PE=3 SV=2
213	TM213	A1	4308517	0.858	ATAATATAATTCAAGTTATACAAACTTACCTAGCGAAATTGCATAAATATCAAGATTCAG[G/T]GACATTTTGGTAATTTACCATTTTTCCAATTTTCACCCGATCTTAAATTGACAATTTCAT	Gh_A01G0316	intron	G	T					A01	4223353	4318777	-	AT4G19050	NB-ARC domain-containing disease resistance protein	P0CB16	DRL25_ARATH Putative disease resistance protein At4g19050 OS=Arabidopsis thaliana GN=At4g19050 PE=3 SV=2
214	TM214	A1	4312547	1	TATTGCACACAAGAGGAGACCCAGAGCTTGAAGCAGATTTATTAAAAGTAGCTTGAAGCA[A/G]GTTTATTGAAAGTAGGTCGAGAGAAGTCGAACCTATACAAACCATCATGCATGTCGCCCT	Gh_A01G0316	intron	A	G					A01	4223353	4318777	-	AT4G19050	NB-ARC domain-containing disease resistance protein	P0CB16	DRL25_ARATH Putative disease resistance protein At4g19050 OS=Arabidopsis thaliana GN=At4g19050 PE=3 SV=2
215	TM215	A1	4316586	0.965	AATATCTTTTGAAAAAATTCCACAATTAGCAACTCTCAAAATTTTGAGATTTTGCAAGAA[A/T]CACTTGGGAGATTGGTCATTGCACTTGAAATCCATCATTATTTGTGATATATCAACCAAG	Gh_A01G0316	intron	A	T					A01	4223353	4318777	-	AT4G19050	NB-ARC domain-containing disease resistance protein	P0CB16	DRL25_ARATH Putative disease resistance protein At4g19050 OS=Arabidopsis thaliana GN=At4g19050 PE=3 SV=2
216	TM216	A1	4320862	0.965	TTCCACTTTAATTGAATGATCCTCTGGATATAAACCACACAATAAGAAGCATTTCTTGTT[T/C]GTCTCCTTCTTCAAGTATTCATAACTCATCTTGATACACAAGTAGGCATTTTTTTCTTCT			T	C
217	TM217	A1	4335006	1	AAGGAAGTGGTTCCTCTAAAGGGACAGCCAAATGCCGACAAGTGAAATTTTGGGTCGAGT[T/C]AATGATTAGCAAGATCCCAAAGTCGAAATTGAACTGGGTGTTGTAGCAAAGGAGGATGAG			T	C
218	TM218	A1	4348851	0.935	TAGAATCTAAATATGGAAAACAAAATAGAAGTTAGATCCTCTAGATATCACCGCTTGAGT[A/G]CCTATACACCAGCTCCATAAAGTCTTTCTTGAGTTCAAAATGTGTTTAAAAGATCCCAAG			A	G
219	TM219	A1	4358401	1	TGAATAAGTGCTCGTCTATCTGAACATCAAGCAAGTAAGGTAAGTCTCCATAGTTACTGT[C/A]GAATAATTGCTTAGTCTCTTTGCCCCACTGATCCCAAATTGCCTTAAGCTCCTAGAGATT			C	A
220	TM220	A1	4366218	1	AGCCACTTTGTTGGATGATATAAGTTTGAGGAGCTGTGGAACTGGTTCAGCGGATTCCTG[T/C]AACTCTATTGAAACCGAATTCTCGCCATCATTCATTCTGATCTTCGTTAATAAATAAGTC	Gh_A01G0317	utr	T	C					A01	4366432	4377717	-	AT3G14460	LRR and NB-ARC domains-containing disease resistance protein	Q9LRR5	DRL21_ARATH Putative disease resistance protein At3g14460 OS=Arabidopsis thaliana GN=At3g14460 PE=3 SV=1
221	TM221	A1	4370380	0.988	TGTTAGCAAACACTGGAATACTAAAAAGGGATAAAAAGGAAGTACCTCTAGATAAGCCTC[C/G]TCAGCATCTAAATGAACAACCGAATCAGTTATTTGAGGGCAACCTGACACTGAAAAGGAC	Gh_A01G0317	exon4	C	G	GAG	GAC	E	D	A01	4366432	4377717	-	AT3G14460	LRR and NB-ARC domains-containing disease resistance protein	Q9LRR5	DRL21_ARATH Putative disease resistance protein At3g14460 OS=Arabidopsis thaliana GN=At3g14460 PE=3 SV=1
222	TM222	A1	4376929	0.988	ATATATTATATTCTTCTAATCTTGGAAACTCGAAGTCTTCTATAAAATGGGAAGAAGATA[A/T]CGACAAGGATAATGCTGTCAATCTAGTCAGGAATTTTATCTCTAGAAGGATATCATCACT	Gh_A01G0317	exon3	A	T	TTA	ATA	L	I	A01	4366432	4377717	-	AT3G14460	LRR and NB-ARC domains-containing disease resistance protein	Q9LRR5	DRL21_ARATH Putative disease resistance protein At3g14460 OS=Arabidopsis thaliana GN=At3g14460 PE=3 SV=1
223	TM223	A1	4390409	0.965	TTTTAATATTTATGAATTTTTCAATTGTTTATTTAGTTATTGTTAGACCAGCGGTTAGAC[C/T]GATTAAACCGGGAACTAGTGGTTTGACTAGTTCAATTACTAGTCCAATTTTTAACATGCT	Gh_A01G0318	intron	C	T					A01	4387436	4391234	+	AT1G78590	NAD(H) kinase 3	Q500Y9	NADHK_ARATH NADH kinase OS=Arabidopsis thaliana GN=NADK3 PE=1 SV=1
224	TM224	A1	4394233	1	AGCAGTATGCACCTGCACCAGTTTCTCTGAGAACTTTTTTGCATTGCCTCGCATTTTTGC[C/T]AGCACAGAGCTATTCTCTTCATCTTGTACTGAATTTCTAATTCATTTTGCCTAATGTAAA	Gh_A01G0319	utr	C	T					A01	4394482	4395218	-	AT1G53490	RING/U-box superfamily protein	0	0
225	TM225	A1	4427565	1	AAGGGTTGTTTTCAAAGGACACTCTTGGAAAGGTAGTGGCTGAAGGGGAAGGTGATTCAG[C/A]AACTGTAGGCAATGAACCGCCGTGATCAGGTGGTTGTTGTTGAAGTTCATCCATTTCCAA	Gh_A01G0321	exon1	C	A	GCT	TCT	A	S	A01	4424808	4427973	-	AT1G78610	mechanosensitive channel of small conductance-like 6	Q9SYM1	MSL6_ARATH Mechanosensitive ion channel protein 6 OS=Arabidopsis thaliana GN=MSL6 PE=1 SV=1
226	TM226	A1	4438742	1	GTTATCATAAAAGATGTGTTGGACATAAAAGTTCCCTCGATCCATAGGGAAAATGGCACG[G/T]TTATTGTCGCGCACCAGCTCAAATCTCTTAAGACCACAGCTTTGAGGCTCGGTTGTTGAT	Gh_A01G0322	exon1	G	T	AAC	AAA	N	K	A01	4437599	4438942	-	0	0	0	0
227	TM227	A1	4443626	1	CTCCAAAAGATACAATTCCCTCAACCTTCCACTAAAGGTCCAATCCATTAAGGGTTTATT[T/C]TAATAAGGGTACAACTCCTAAAAGTACAACTCTCTCACCCTTCCACTAAGGGTACGACTC			T	C
228	TM228	A1	4449769	0.935	GTATTGGCTTTTACATTGAATCCATTGGTTCCAATCTGTTCCAGAAGTTTACTCCAGGAA[T/A]CAATATGCTGTTTCTTTTGTATACTGCGTGCATGATGCTCAACATTAATTATTGCCTAAC	Gh_A01G0323	intron	T	A					A01	4446747	4449972	+	AT1G78630	Ribosomal protein L13 family protein	Q9SYL9	RK13_ARATH 50S ribosomal protein L13, chloroplastic OS=Arabidopsis thaliana GN=RPL13 PE=2 SV=1
229	TM229	A1	4469251	1	TTAATCAATTTGGTACCAATTTTGGGCGTGGTGAGGGTGCTAATCCTTCCTCACACGTAA[T/C]CGGCTCCTGAACCCGTTTTCTCAAATTTACGTAGGCCAAAATTGATTTAAATGAAATAAA			T	C
230	TM230	A1	4505611	1	TAGTCATTTCAATGCACCAACATCCATGCATGATAAAGCATCTAGTGGCCTATTGGACTA[T/A]TACTCACAAGATATCCAACTCTGACATATTTTCAAGAGAAGTAGGTAGCTTTCCAATGAT	Gh_A01G0326	intron	T	A					A01	4477191	4520626	-	AT1G53420	Leucine-rich repeat transmembrane protein kinase	C0LGN2	Y3148_ARATH Probable leucine-rich repeat receptor-like serine/threonine-protein kinase At3g14840 OS=Arabidopsis thaliana GN=LRR-RLK PE=1 SV=1
231	TM231	A1	4597669	0.988	ATTGACACCAATACTCATGTTAATCGAGTTAAGACTCAATCAACATGTAGCACCCCAAAC[T/C]CGGCCCAGAAGTTATGACCGGATCCGGCATGCCACATCAAAAACGTTAAAAAAATTTCCA			T	C
232	TM232	A1	4603653	0.996	GAGCAGTGCAAGTCATCCATAATCCGTTCTGTGGCCTCCAACCAATATTCCGCCACATTC[A/G]GGGCTATACCAGACACGCCCCTAAAGATCTCCGTTCCGTTAGTCCCGAAGTCATTCAAAA			A	G
233	TM233	A1	4615945	0.858	GTAAGTCCAGTTGACATAAATATTATAGGTTCATTAATTCAATTCTCTGTTCGATCCTTC[T/A]TTAGACTTTAGTTCATTGTATGTGATTAGAAAGTACTTAGCTGAGTTTCCTTTGTTGAAC	Gh_A01G0329	intron	T	A					A01	4613492	4621111	+	AT1G53440	Leucine-rich repeat transmembrane protein kinase	C0LGG8	Y5343_ARATH Probable LRR receptor-like serine/threonine-protein kinase At1g53430 OS=Arabidopsis thaliana GN=At1g53430 PE=1 SV=1
234	TM234	A1	4619010	1	TCAAAAACCAGTTTATTGCTAGTCTTTTGACCTCCCATTTTATTGACTCCCGTCTTGTTC[C/T]TTTAGACTTCCCGGTTGACACTGGGAATGGGTTATCCGCTGGAGCTATTGCTGGTATTGT	Gh_A01G0329	intron	C	T					A01	4613492	4621111	+	AT1G53440	Leucine-rich repeat transmembrane protein kinase	C0LGG8	Y5343_ARATH Probable LRR receptor-like serine/threonine-protein kinase At1g53430 OS=Arabidopsis thaliana GN=At1g53430 PE=1 SV=1
236	TM236	A1	4653338	1	TTTTTAAGCGTTCTGCAATTTAGCTTATATGTATTTATAAATTGGCCCTAAAGTTTGTAG[C/T]GTTTCGCAATTTAACCCCGTTCAATGCTGTGTGTTTTAAATGCCTGGGGAATTTGCTCTT	Gh_A01G0332	intron	C	T					A01	4652102	4672959	+	0	0	0	0
237	TM237	A1	4658823	0.988	GAAGAGGGCCTCCAAGAAAAAGAAATGCAACTTAGCTATTTGATCAATGAAATTCGTGGG[C/G]TAGCTATGCACGTGGTACAACTATCGGAAGAAGCTAAAATTCTTATTTGCCAATTCCCTC	Gh_A01G0332	intron	C	G					A01	4652102	4672959	+	0	0	0	0
238	TM238	A1	4661767	1	AAGCATGTTGGTAATTGCTTATTAATTTCATATGGACTTACTAAGCATTTATGCTTACTC[T/C]CTCCTTTTCATTCATTGTAGTTTTGACAAGCCAGCTCGGAAATCGAGAACAGTCGGAGGC	Gh_A01G0332	intron	T	C					A01	4652102	4672959	+	0	0	0	0
239	TM239	A1	4665004	1	ATGCTATAGAATGTTCCTTCCGATCCATTGAATTTGTCAATGCCACATTCGTCGCTGAGG[A/G]AAATAGAATTCCTGCGCCTAAACTGTCAAGAAATACCAGGATGGGTATCAAGATGGCTGT	Gh_A01G0332	intron	A	G					A01	4652102	4672959	+	0	0	0	0
241	TM241	A1	4674079	1	TACCAGATGAACTGTAATAGGAGCATGCATGAATTGACAAACACGATTAACCGCATATGC[A/C]ATATTTGGCTGAGTTAAGACCACATATTGAAGAGCACCAGCAAGGCTTCAGTATTCAGTA			A	C
242	TM242	A1	4679124	0.965	CTAAACTCTCAATGAAGCTTCCCTTCCCTGCATTATAGACACTTCTCATCAAATAACTTT[T/C]CAGGGTTTTCAATTATATATGGCATATCATCTAGGCCAGTTAAAAGGTGACCCTCACGTT			T	C
244	TM244	A1	4686653	1	AGAATGGCCAAAGGAAGTCATTGAACAGCATTGGGTCTCAGTTTTTCAGAACCTTCACGC[C/T]AAGGATATAACGTGGAGAGCACTGTGGATCCGCGCTTCGGTTCTATTATACAAGGTTAGA			C	T
245	TM245	A1	4690983	0.965	TTACTCTAGAACCAAACCACATATAGAGAGACCTAGGAGCCCACCCTAGGTAGAGCCACT[T/C]CGAACCCCTAGTGGTCACCTGAATTGCTTTATTTGTTATTTATTTATCCTGCACTAACGT			T	C
246	TM246	A1	4695127	1	TCATTGCATTTGTTACCAGCAATGCACCATATGTGAGGACAGATGATGAAGCCATAGAAT[A/G]TTCTTTTCGATCATTGGAATTTGTAAATGCGACCTTTTTTGTCGAAGGAAATAAAGTCCC			A	G
247	TM247	A1	4701228	0.935	GTGCTTAGATATCAATAGCATGAACAAACCCGTTACGATTCCTGAAATTGATTTTGAGAA[A/G]GCTATTTGTTTAGGAGAATTTGAAGTCGAAGAAAATGCTGAAGACTATGTCTCGTCTCTT			A	G
248	TM248	A1	4704874	1	GCGTTTCGAACGGTGGGTCAAACAACGAGACTACAGTATTTGAAGCATTTATGAAAGCTC[A/G]AAATCTTCTATGCAAGAAGCCATGCTCGAAAAGATTCTAGATGAAAGAACGTGGAATAGT			A	G
249	TM249	A1	4717493	0.988	ATATCTTCGTTGCAGAAAATAAATCTAAGAAACAATTATCTCTTTGGTTCCATACCCTCT[G/T]GTTCGCACGATTTTCTTTCCCTAGCACTCATAGATTTCACCTTCAATAATTTCACTGGCC			G	T
250	TM250	A1	4726256	1	AATAAAAGATATATTTGGCTCTCAGTCAAGTTTGCTGGAATATTATAAAAAAGAATATGT[C/T]GAGCCTGAAAATGCAGCTGTTGAAGCGGTTTGAGAAGTGAAGAGAAATGGGTATTAAAGG	Gh_A01G0335	utr	C	T					A01	4725242	4725511	+	0	0	0	0
252	TM252	A1	4735458	1	TTTTGAAGCTCAATGGTGTTTAGAGCAAGATTTTGAAGATAGGGTGAAATCGAGTTGGGA[A/G]GAGATTTCTAGAATTGTTCCATCGAAACTTATAGAATTAGGACAGTGCATTCAATATTGG			A	G
253	TM253	A1	4740667	0.988	ATTCTCTGACTACAGTTAAAAAACTGTACTCAGACGGAGAAGATAAATCGGTGATGAGAC[A/C]GCTTATTAACAGCATTCATGTTCTTGAGAAACAGTTTGAGTATGTGGCTTACTTTTTTGT			A	C
254	TM254	A1	4750704	1	AGGGGAAAAATCAAGTTAACCCCCAAATATTGGTGGTGACAAGTGTATTGAAATTGCAGG[G/A]AGTTACTTAAAGCACATGTAAACTTGCTTACAGTCTAGTTAATTTGTACCTAACCATGCA	Gh_A01G0339	utr	G	A					A01	4750918	4751211	+	0	0	0	0
255	TM255	A1	4768647	0.976	CCTCTGGGGAAACCCTCTTTACATAAGCAGCAATGCCAGCTATGAGCCCACCACCACCAA[T/C]GGGAACAAAGATTGCATGCAATGGGCCTTGCATTTGGCGCACAATCTCCATTCCAATAGT	Gh_A01G0341	exon5	T	C	ATT	GTT	I	V	A01	4767078	4773447	-	AT3G10050	L-O-methylthreonine resistant 1	Q9ZSS6	THD1_ARATH Threonine dehydratase biosynthetic, chloroplastic OS=Arabidopsis thaliana GN=OMR1 PE=1 SV=1
256	TM256	A1	4772798	0.988	AAGATCCTCAAAATTTTTCAAAAAAACCAATTAAGCCCCTACTTTTTCTTTCACTCAATT[A/G]CCAAAATACATCAAAAAGGTCCTTTGACCGTTAAAGTTAACTGCCCCTAATTTTTTTCAA	Gh_A01G0341	intron	A	G					A01	4767078	4773447	-	AT3G10050	L-O-methylthreonine resistant 1	Q9ZSS6	THD1_ARATH Threonine dehydratase biosynthetic, chloroplastic OS=Arabidopsis thaliana GN=OMR1 PE=1 SV=1
257	TM257	A1	4777111	1	GGTAAAATTGGTCTGTAACAGCTGCCCCTCTTTGCTTATTGTCGTGTAACGAGAATAGAG[A/C]AAAGATATAATGAAAGGCCAATTTTTCCTGATCTTGCTGAGTCTTGACTTCTTTGGTGCT			A	C
258	TM258	A1	4783404	1	CACTTTCAATTAATAACAGCGTGCTTCGTGTATTATCCTATCCGGGGTATATCATCCCTG[T/C]AGATGTAAATGTTTTTGACAAAGGAGGGTACGTTATGGGCTCCTATCCCAATTCTCGGCC			T	C
259	TM259	A1	4785665	0.996	GGATTAGGGGTATAACGGCTTCCCATTCCCACCATATGGGCTTCTGGTTCTTTCTTCTTC[G/A]TGGGTGCTACCCTTCTTGAACTTTCTTGAGCTTCCATTCTACCGCTCTTGACGGCATTCT			G	A
260	TM260	A1	4798578	0.965	GAAGAGTAATGAATACAAAACATAAAGAAAACCCAAAACTTTTGAAGGGAAGTTGAGGGG[T/C]AGATCTTCCATCTTGAAAGTGAATCCGGCTTCTAAGATGGATCAATCGGCTTTCTTCGAG			T	C
261	TM261	A1	4805646	0.965	CCAATACAACCTCCGTTCCCCAAATGGTACGACACGAACGCCCAATGTGAATAGCACGCG[A/G]GAATCATAGGACACTCGATTGAGAACTGTACTACTTTCAAAGAGATAATCGAAAGACTCA			A	G
262	TM262	A1	4809618	1	ACTAGCCTTATCTCCCTGAAGTTGCAGCGGAACAGACTGAAGATAGCAAATCTCATTTCC[C/T]TAAAGTTGCAGAAGAACAGATTGAAACTACAAATTAGGGTGGATCTTATTTTCCTAAAGT			C	T
263	TM263	A1	4813977	1	AAGCAACAAGTTCCTTCATTTAAGGGTAATTTTGTTGGAATCACACTTGCCAAGGAGCCT[G/A]CAAAAATGCTTCCTGCTAGTGATGATAAAGGGCATGCAATGGCTAATAATGAAAGGCTAT	Gh_A01G0342	exon1	G	A	GCA	ACA	A	T	A01	4813821	4814111	+	0	0	0	0
264	TM264	A1	4834038	0.915	TTAAATTGACTATTACATAAAACTTCTAATTTTAAGTTGATCCCTCAAAATTAATATATT[A/G]GCTCCGCCACTAGCCCCATTGATATGTTATCTAGTGCCTAAGGGCTACCCTCTATCAAGC			A	G
265	TM265	A1	4838717	0.996	TAATTTTAGAGTCATGCTCATTTATTTTTATCCAAAAATCTCATAAACTCTAATCAAGGA[A/C]GAAGATCGGGGGAGGGGTCATTTCCGCGGGATAATTACTCTCATTCATAAAATAAAAGAG			A	C
266	TM266	A1	4942632	1	AAAAGACTCAGGAATAGAACCCATGATTTTATTATTGGATAAGGAAAAATGAGTGAGGTC[T/C]TTGAGATCTGTAACTCTAGTTGGGATATCACCTGAGAACTGATTGTTCGACAAATCCAAA	Gh_A01G0351	intron	T	C					A01	4933609	4986572	-	AT1G78680	gamma-glutamyl hydrolase 2	O65355	GGH_ARATH Gamma-glutamyl hydrolase OS=Arabidopsis thaliana GN=GGH PE=1 SV=2
268	TM268	A1	5248057	0.988	CTGCCACAACCAATCGGTAACTTTCAGTACTTGGTTTAAAATTTATCAGTAATATTTGCT[A/T]GTTTTGAGAGTGTTCATGGCAGATGAGTACTTTGTTTTCCACTTCATGTTAAATCATTTG			A	T
269	TM269	A1	5256632	1	TTCACAAAATAACTCCCTTCAACATCAACTCCCCCAACGTTAGTAACACTCCCCCTTTTA[T/G]TCAACTAACTTGCCAAACTATTCATCACCAAGAAAGGCAAGAAGATCTGCTTGTAAGGCC			T	G
270	TM270	A1	5259934	1	GCTAGAGGGCTTGTGTTTGAATCCTCGCGTGAGCATGGGAGATAATTTTTGGCGTCGACT[A/G]TTGATAGTAGTTCGGTGGTAATGGGATTCTGAGATAGTTGGGTTGTTAGTGAATGCAGTG			A	G
272	TM272	A1	5276419	1	CGCGAACAAATTGGCGTGTCTAAAAGCCAGTTAGATTCTATCAAGGGAGATAGAGATCAA[T/A]TTTAAACAACTCACGCGGTTGAGGCCGTTGATTCAAGTTGGGCTTTTCAAATCACAAAAG			T	A
273	TM273	A1	5351569	1	AAAATAATACACCTAATAATGTAATTACGAAAATGGTATGGTCAGGCTGGTCATGCCACT[C/T]TGACAGGCGGCACCACCTTGACGTGACGGTGAACAATGACCCGCAACAGTAAAAAAAAAC			C	T
275	TM275	A1	5370811	0.976	TCTGGATCGTGGTGAACAACTTGTTTGTGGCCGATTCGAGCACGAAACAGTCTCAGTTGC[G/A]TCATGAGCTTCACTCCATTCGAAAAGGTAGCCTCTTTATTCGAGCCTACGTAAATAAAAT			G	A
276	TM276	A1	5373344	0.976	GGAAGTCCTAATAGTGAGCCTGATCTGCGTGGTTCTTCTGCTACATGTGGTGCTTCTCGT[T/C]ATAGTTCTGTCAATTTGTTAGATGACTCAGGCACTATTGTCCGAGAGGAGGTTGTCTCTA			T	C
277	TM277	A1	5381912	1	TTCACAACTCAGTATGGCTAATACCATACCTACATTTCACAACTCGGTATGGACCAACCA[C/A]GGTCTTTTCCGTCAATTCATCTTGTCATTGAACTGAAGTGCTCAATTTGATCATTTATTC			C	A
278	TM278	A1	5390774	1	TTATCAATTAACTGGTCGATATCCTATTAGGATCTTTCAATACATCCACTAGAATAACAC[A/G]TCAACAAAGACTATTTATCTTCCGACCTCAAAATCCAGATTGGCTCAGGGTTAAGGTGTT			A	G
279	TM279	A1	5393480	0.965	CCATATCAACCTTCCCATTATCATCTCTAAGAGAAACCATGAAAAGGTGGTTAATACCAT[T/C]GTATGTTGTGATCTTTTCCCTCTTCTTTACCTATAATTCTTCTGCTCTAACAATACCGTT			T	C
280	TM280	A1	5473311	0.988	TTTTGAAGACAATTGGTACGATATTATTAGTCTCGTTTCAATTTTTGTATGATTCCTACA[G/A]TATATGAGCACGTATAGATTTGTCTTGTTTCGTATTGGCTGGTACCATACCTTCTTTCGA	Gh_A01G0365	utr	G	A					A01	5469742	5472737	+	AT3G14830	0	0	0
281	TM281	A1	5481267	0.996	CCAGGAGAGGATGGTGTGTCTCAAGAAAATGTTGAGTTCACTCATTTGAACAGCAAGATG[T/C]CGCCATTGCTTCTTGGCTTTTGTCCTCGGTGAGTCAATCTGTTTTACCTCACCTTATTGG			T	C
282	TM282	A1	5548942	1	TGAAGTGACCCTGTTATTATAGCCTGTGACATAATTGGGGTGTAACATGTTTTATTAACA[G/A]GGCCACTGCGTTTAGTAGACATGGACAACACGAATTACTTGATTATATTGGAAGGCCACT			G	A
283	TM283	A1	5562432	1	GACAATCATTAAATTGTGGCCAAATCAAAAAGATGGAGAATGTAACGCCCCGTACCCGAG[G/A]CCGTCACCGGAGTCGAGCATAAGGCACTACTAAACTTATTTGAGCACTTAACCAAATTCA			G	A
284	TM284	A1	5577186	0.899	CCACTTGAATTTCCAGTTTCAAGATTTTTTACATTTTTATCGGAACCTTCTCCTTGCAAA[G/A]TGTTCTGCACTCAACACCATTAAGATACAAGTTCTTATTTCACTATACATCCAATTCCTA	Gh_A01G0379	exon2	G	A	ACT	ATT	T	I	A01	5574865	5578281	-	AT1G78810	0	0	0
285	TM285	A1	5587535	0.935	CCTTTATTATTCCTCCATAAAAGGAAAGATCCTCCATTCTATTTGAACAAATCTCGAATA[A/T]TTTCTAGCACTGAGACTTAAACCAGCATGACGGTGCTTGTTGAAATAATTGCTCCCAGTC	Gh_A01G0380	intron	A	T					A01	5584683	5588925	+	AT3G14890	phosphoesterase	Q84JE8	ZDP_ARATH Polynucleotide 3'-phosphatase ZDP OS=Arabidopsis thaliana GN=ZDP PE=1 SV=1
286	TM286	A1	5634957	1	GAAAAGCAGCTTTCTATCATCATTAGAAAATTGCAGATTCTTGAGTTACTTGTCATTTGC[G/T]AGAAATCCGTTGATCAGTGGTTATCTTCCGGCTTCTATAGGAAACCAGTCGTCTTCTCTT			G	T
287	TM287	A1	5640122	1	CATGAATCAAGTTGAACTCCCCAAACGGAAGCTCCATTAAATTTTCCATAAAAACAGCCC[C/A]TTGCACCTCTAATGGAACATCCCTATATAACCTGAACAAACTGCCCCAACGGTCTTAGTA			C	A
288	TM288	A1	5645545	0.935	TTATTTATAATTCGAGCTACAGAGCTCCAAATTAAGATCCATAAATTTCCTTTGAAACTA[T/C]ACTCATATATCTTTCCACCATAAAATTTTCATAATTTTTGGTTTAGCCAATTAGTACAGT			T	C
289	TM289	A1	5650271	1	GACCCGAATCTGCGACCTTTTACCTCGAATAGTCAAATTGTGCGACTAGTCCTTTGTTTT[T/C]GCGCAAATCTTTAAATTAATTCTTATTTTCATTTCATTTCATTTCAAATTTGTCATAGAG			T	C
290	TM290	A1	5665251	0.965	GTTGGAAGGGATTCTACCAAAAGAAATAGGAAACTTGAAAATGCTTAGGAGTCTATATCT[T/C]GACAACAACCTGTTCGAAGGTAAATGGAAACCAGTTGGATGTTATTTTAATTTGTTGTCT	Gh_A01G0382	exon4	T	C	CTT	CTC	L	L	A01	5663707	5665744	+	AT5G46330	Leucine-rich receptor-like protein kinase family protein	P93194	RPK1_IPONI Receptor-like protein kinase OS=Ipomoea nil GN=INRPK1 PE=2 SV=2
292	TM292	A1	5735578	1	ACGATCCCATTTCCGTTTAGGAACACTAATAGGCTGAAGTAGTCCTGTAGGAACTTGATG[C/T]TTCGCTTTTACCCGTTGACAAGTCAAACATTTACTTACCAATTCTACTATGTCTGTTTTC			C	T
294	TM294	A1	5793333	0.988	AGTAAGGGAGCAGATTTTAGCCACTAGCCTTATTTCTCTGAGGTAGCAAGAGAGCAGGCT[G/A]AAAATTGTAGTCTTATCTTCCTAAGGTAGCAAGGGAGCAGACTGATGATTCAGATTTTGT	Gh_A01G0383	intron	G	A					A01	5759260	5878720	+	AT5G46330	Leucine-rich receptor-like protein kinase family protein	Q9C9H7	RLP12_ARATH Receptor-like protein 12 OS=Arabidopsis thaliana GN=RLP12 PE=2 SV=2
295	TM295	A1	5798932	0.899	AATACGTCAATGATAATGTCCTAATGAACAACGAGCAATGATACCTTAAGCCTTTTTTTT[A/T]AAAAAAAAGAGAAGAAGAAGCTAATGACATTTCTACATTCATAACACATCTAGTTAGGAG	Gh_A01G0383	intron	A	T					A01	5759260	5878720	+	AT5G46330	Leucine-rich receptor-like protein kinase family protein	Q9C9H7	RLP12_ARATH Receptor-like protein 12 OS=Arabidopsis thaliana GN=RLP12 PE=2 SV=2
296	TM296	A1	5804831	0.976	AACTAGGTACCAATTTTGGGCGTATCGAGGATGCTAATCCTTCCTCGTGCGTAACCGACT[C/T]CCGAACTCGTTCTCTGATTTTTCGCAGACCAAAAAAATTATCGTTTTAGTAAATCTTGAC	Gh_A01G0383	intron	C	T					A01	5759260	5878720	+	AT5G46330	Leucine-rich receptor-like protein kinase family protein	Q9C9H7	RLP12_ARATH Receptor-like protein 12 OS=Arabidopsis thaliana GN=RLP12 PE=2 SV=2
297	TM297	A1	5816566	0.965	TGTAATTTCTACGAAGAAAAGCAATCGAAAGCAAATTAAACTTGCTTTTTGGGTAGATGA[T/G]ATACTAGTCTTAAGTCTACTCATATGTGTCCCATATCTTAGAAACGCACTCCACGCTCCA	Gh_A01G0383	intron	T	G					A01	5759260	5878720	+	AT5G46330	Leucine-rich receptor-like protein kinase family protein	Q9C9H7	RLP12_ARATH Receptor-like protein 12 OS=Arabidopsis thaliana GN=RLP12 PE=2 SV=2
298	TM298	A1	5818995	1	TTGATGGTAGATATGGTATTTTCACAAGTCTTGCCCTTAACGACAACCAATTGGAAGGGT[C/T]ATTGCCACGATCCTTGGTTAATTGTTCTTCATTAGCTTTTTTAAACTTGGCAAACAATAG	Gh_A01G0383	exon2	C	T	TCA	TTA	S	L	A01	5759260	5878720	+	AT5G46330	Leucine-rich receptor-like protein kinase family protein	Q9C9H7	RLP12_ARATH Receptor-like protein 12 OS=Arabidopsis thaliana GN=RLP12 PE=2 SV=2
299	TM299	A1	5824803	0.787	CTAAGCCATGCTTGCAGCAAACCTTAGCCCCATCTCCCCTCGCGCCGCAAGTTGCCACTA[G/A]TGGCTTCACGCTCCACCTCTACAACGGCCTCCACACGCGCCACCCTCCAGCTGTACCTGC	Gh_A01G0383	intron	G	A					A01	5759260	5878720	+	AT5G46330	Leucine-rich receptor-like protein kinase family protein	Q9C9H7	RLP12_ARATH Receptor-like protein 12 OS=Arabidopsis thaliana GN=RLP12 PE=2 SV=2
300	TM300	A1	5836215	0.988	TCGCATCTTCGAAAATAAGCGTTTTATTCAAAACTCGTATGGTGATCTAAAATAATATTC[T/C]GTGATTTAGGTTAAATGAGAAAAATCGAAACCCAGTAAGTTAGGGCACGATTTTCTCAAA	Gh_A01G0383	intron	T	C					A01	5759260	5878720	+	AT5G46330	Leucine-rich receptor-like protein kinase family protein	Q9C9H7	RLP12_ARATH Receptor-like protein 12 OS=Arabidopsis thaliana GN=RLP12 PE=2 SV=2
301	TM301	A1	5843521	0.988	TAGGTATCGTAAGGCCGCCGTATGCCCCACCTTTGATCAAAATTTGAATCGCCCTTTACG[A/G]GTTTCAATTCAAAATCCCTTTGGTTTCAAGGTGCTCTTTGCGAGTTTTCACCCTGGCCTC	Gh_A01G0383	intron	A	G					A01	5759260	5878720	+	AT5G46330	Leucine-rich receptor-like protein kinase family protein	Q9C9H7	RLP12_ARATH Receptor-like protein 12 OS=Arabidopsis thaliana GN=RLP12 PE=2 SV=2
302	TM302	A1	5853713	1	TCGACTTTATTTGGAAACGAAAATTAAAACGGGAGTCGCCACCAATCCTTTTTTGATGAG[G/A]TGTGATCGGATCACCTTAAATTAATCATTCTAGTAAAAGTTAAGATTTACTAAAACGATG	Gh_A01G0383	intron	G	A					A01	5759260	5878720	+	AT5G46330	Leucine-rich receptor-like protein kinase family protein	Q9C9H7	RLP12_ARATH Receptor-like protein 12 OS=Arabidopsis thaliana GN=RLP12 PE=2 SV=2
303	TM303	A1	5855962	0.988	CATTCTTCTGTAATCTAACACGCTTGAAACATCTGGACGCATCCAATAATTTTCTAACGG[G/A]TATTGTATAACATTTATTCATTACATATATTTAATATCGTGACTGTTCTTCTTCTTGAGC	Gh_A01G0383	intron	G	A					A01	5759260	5878720	+	AT5G46330	Leucine-rich receptor-like protein kinase family protein	Q9C9H7	RLP12_ARATH Receptor-like protein 12 OS=Arabidopsis thaliana GN=RLP12 PE=2 SV=2
304	TM304	A1	5860554	1	CTGGAAATTGAACTTAGTGTGATTTTTTAGTACAATAATTTTACTCTTTCACATGCTTCC[A/G]CACAACAATTGGTATCAGAGTCAGATTCGTACTTGGGGAATACGACCGTTTACGGTACTA	Gh_A01G0383	intron	A	G					A01	5759260	5878720	+	AT5G46330	Leucine-rich receptor-like protein kinase family protein	Q9C9H7	RLP12_ARATH Receptor-like protein 12 OS=Arabidopsis thaliana GN=RLP12 PE=2 SV=2
305	TM305	A1	5871325	0.858	TGAATTGAATGAAATTGTATGAATTGTGACAATGGGTGAATATATGTGATTATCAGAATG[A/G]TATATTGATGAAAGAATTATTAAATTGAGAAAGTGAATGAAATACCCTATTAACTAGTCA	Gh_A01G0383	intron	A	G					A01	5759260	5878720	+	AT5G46330	Leucine-rich receptor-like protein kinase family protein	Q9C9H7	RLP12_ARATH Receptor-like protein 12 OS=Arabidopsis thaliana GN=RLP12 PE=2 SV=2
306	TM306	A1	5905251	1	CATAACTCTGATCACAATTGTTTCACTTCCACAAATTTTGATGAGGAACACTGGGTTCTC[C/T]CTGGCTCTTATGATGGCGGTGCTGTTGCTTCATTTTGTGGCTTTATTCTCTACCAAAACA			C	T
307	TM307	A1	6180947	1	ATGCAACTTGTGCATGAAAAAGAGATTCAGCAACTTCATTGTCATCAGGAAGTTCCCTTC[C/T]CAAAACTTCATAATCTCGGACAGCTTCAGCCCATCTCTCTAGCTGTACTTCACAATGACT	Gh_A01G0392	exon5	C	T	GGA	AGA	G	R	A01	6180321	6183586	-	AT2G42580	tetratricopetide-repeat thioredoxin-like 3	Q9MAH1	TTL1_ARATH TPR repeat-containing thioredoxin TTL1 OS=Arabidopsis thaliana GN=TTL1 PE=1 SV=1
308	TM308	A1	6208993	1	AATGTTAGTGGCCAATTTGTCATTAAGCCTATTTTTTATTACTCGAGCTTTGCTCAGGTC[A/G]AGTCATAAAAAGCCTCCTGCAGACGCTATACGCCCAATCATTCCGGATAATGCGGCTGTT			A	G
309	TM309	A1	6218664	0.965	TGATATTCTTATCTTTTTAAATATCTTAAATCACATCCTCATCATCCTAAGAGTACACGT[A/C]CAAGTAAAACACGGTAGAAAAATATAAATGGGAAAGGCACATTGCAACGTTCCATGCTAA	Gh_A01G0394	intron	A	C					A01	6217320	6239453	-	AT1G53290	Galactosyltransferase family protein	Q8L7M1	B3GTE_ARATH Probable beta-1,3-galactosyltransferase 14 OS=Arabidopsis thaliana GN=B3GALT14 PE=2 SV=1
310	TM310	A1	6225472	0.988	AAGTTTGCTAAATCCCATCAACTAACGAGAAACACTTATCCCATAGGTTAAGAACACACA[C/A]ACACACACATATATATATATATGAATACTAACCATTTCAGCTTAGGATCAGTAAATACCG	Gh_A01G0394	intron	C	A					A01	6217320	6239453	-	AT1G53290	Galactosyltransferase family protein	Q8L7M1	B3GTE_ARATH Probable beta-1,3-galactosyltransferase 14 OS=Arabidopsis thaliana GN=B3GALT14 PE=2 SV=1
311	TM311	A1	6229667	0.988	TTATACTTTCCATCAACATAGATACGCATACTTTTATCAGTATCATTTCATACCTTTCCA[T/C]CAGTTCACAACATAGTCGATTGGAAAACTTATAGTTCCTTCCCTTTACGTGCCTATTGAA	Gh_A01G0394	intron	T	C					A01	6217320	6239453	-	AT1G53290	Galactosyltransferase family protein	Q8L7M1	B3GTE_ARATH Probable beta-1,3-galactosyltransferase 14 OS=Arabidopsis thaliana GN=B3GALT14 PE=2 SV=1
312	TM312	A1	6232534	0.935	TAAATTTTTAATTTTCTAGTGATGATGTGGCACATATCAGAGTTCTACATCATCAAAGTA[C/T]AAAATTTTCAAGTTCAGGGACCAAAATGAACCTAGTTATTATGTTCAAATGTCAAGGTGG	Gh_A01G0394	intron	C	T					A01	6217320	6239453	-	AT1G53290	Galactosyltransferase family protein	Q8L7M1	B3GTE_ARATH Probable beta-1,3-galactosyltransferase 14 OS=Arabidopsis thaliana GN=B3GALT14 PE=2 SV=1
313	TM313	A1	6236932	1	GAATGATGGAAACGTACAAAGAAAACTCGTAGGGCATATATACCATTTATATTAAGCAAA[T/C]CCTCAGGTATCATATGCCGAACCTAACAAGCTCTGAAGTACTTTAGTTGAACACTAACCT	Gh_A01G0394	intron	T	C					A01	6217320	6239453	-	AT1G53290	Galactosyltransferase family protein	Q8L7M1	B3GTE_ARATH Probable beta-1,3-galactosyltransferase 14 OS=Arabidopsis thaliana GN=B3GALT14 PE=2 SV=1
314	TM314	A1	6246728	0.935	AGTGATATGCCTCGGTTTTTATAACTGAGTTACATAGATCCATTTTGTTTTTTGCTTATC[C/G]TCTGCTACTATTTTTTTGTTTTTTTCCTCTTTGTTTCTTGCATGTTGCGTGTTAGCTTCG	Gh_A01G0395	utr	C	G					A01	6247369	6267476	+	AT1G53280	Class I glutamine amidotransferase-like superfamily protein	Q9MAH3	DJ1B_ARATH Protein DJ-1 homolog B OS=Arabidopsis thaliana GN=DJ1B PE=2 SV=1
315	TM315	A1	6251807	1	TTTACATCCATGGTAGCTGGATGGTTGCATATACTAGACCGACATCCTGCAATGTGCCTT[T/G]ACTATCATCTTGTTTAGCAGACCGACATCGATTGCTAGAACAACTTGGAAGAATTCTAGC	Gh_A01G0395	intron	T	G					A01	6247369	6267476	+	AT1G53280	Class I glutamine amidotransferase-like superfamily protein	Q9MAH3	DJ1B_ARATH Protein DJ-1 homolog B OS=Arabidopsis thaliana GN=DJ1B PE=2 SV=1
318	TM318	A1	6278934	0.965	CATCTGCAAATACCCAAACGGCCAAACCAACAAGCTATATTTATCTTTATTACAATATTT[C/A]ATTCTTGGATCATCTGGTTATGTATATGCTATAATTGCTTACGGGAACAGTTTGGCGTTT	Gh_A01G0396	intron	C	A					A01	6269378	6279470	-	AT1G12740	cytochrome P450, family 87, subfamily A, polypeptide 2	Q7XU38	C87A3_ORYSJ Cytochrome P450 87A3 OS=Oryza sativa subsp. japonica GN=CYP87A3 PE=2 SV=3
319	TM319	A1	6283638	0.949	GACACGCCCATGTGGCCCACACTGCCCAAATTGACCTTGGCCGTGTAGATCACAGGCTTG[A/G]CCCAGAATTTCACACACCAGTGTTTCACCCATATGGGCCCACACGACCTAATAGGTTGAA			A	G
320	TM320	A1	6288314	0.915	ACCTACTAAAATATTTTGTTCCATTTAAATCAATTTTGGTCCACGTAAATTTAAAAATGG[G/A]TTCGGGAGCCGGTTACGTATGAGGAAGGGTTAGCACCATCACTATGCCCAAAAACTAGTA			G	A
321	TM321	A1	6294373	0.935	ATTGTTTCTATATACAATTAAACACGAACCTACGAAACCCACAACTAAAATAGCACTTAC[T/A]CTATAGCCCCACGATTCTGATTACAATTTCGTGCGAAGAGAACCCATTTCTTCCTATTTT			T	A
322	TM322	A1	6299305	0.965	CTAGTCCGATAGATTTATGTCGTCCTATTTCTAGGATTGCATGCAACTCCACTCAATTAT[G/A]CTAGATCTACTCTTAAACAGGGACTTTTGCTCCACTAAAATAAGCACATTAAGCATGAAT			G	A
323	TM323	A1	6303808	0.988	GACTCAATTTAATGAAAATGGTTCTATAAACTCCAGTAATGCCTCGTACCTTATTCTGGC[A/G]GCGGATACAGGTAAGGGGTGTTACAATATGCAACTTGCTGGTTAGAGTTTTTTGATAGAA			A	G
324	TM324	A1	6309831	0.965	TATTTGTTGAGTGTTTTTGTATGTTTGTCCTTTAAAGGGAGTTAAATTCTTTATTTATAT[G/A]ATGCGTCCCTGTTTTTAGATGTGACATCCTAAATAAGTTTTCATGCATGTCAATACGTAC			G	A
325	TM325	A1	6314283	1	AACATAGAAGACCTCAACTTCTTTACTGTGAGGAGTCGGAGGTCATCACAATTTGATTCC[G/C]ACATGTCATGATCTGATCAGCTCACGTACGATTTGTGCCGTGAGAGTATAAGTCTAAATT			G	C
326	TM326	A1	6322359	0.965	TTCCGTATTTGGTAATTCGAGACAATCATGCCCTAATTTACTGGGTTTCGATTTTTCTCA[T/A]TTAACCTAAATAACAGAATACTCTTTTAAATCACAATACGAGTTTTGAAAAATGCTTATC			T	A
327	TM327	A1	6331579	0.988	GCTTTGCCCATTGAAAATTTTAAAGCAAACTAAGCAATGGCCAGTAACACCGAGACAAGC[G/A]AGACCACTGCTGAGTACATAGCTGTTTCCCCCACCTTCGAGCCCCCTCTTGAGGCTGCCC	Gh_A01G0399	exon1	G	A	GAG	AAG	E	K	A01	6331555	6331866	+	0	0	0	0
328	TM328	A1	6334373	1	GTAAGTAGGTCACTAACGGGCATTTCATCGTTACAGCATGTTGCTGCTTCGGGTTTTGTC[G/T]GGTTGAGATCCGCATTAACCAGGATCATCTGTAGCAGGTTTTGAAACTCATTCATGTCCA	Gh_A01G0401	exon6	G	T	CCG	CAG	P	Q	A01	6333775	6336107	-	AT1G59640	BIG PETAL P	Q0JXE7	BPE_ARATH Transcription factor BPE OS=Arabidopsis thaliana GN=BPE PE=2 SV=1
329	TM329	A1	6339061	0.899	ATAATGTATTTGACAGCCAAGCTTCTTTTAATCTTGTGCAAAGTTAAAATTTTAACCTCA[T/A]GATCACTAGTCATTAATATCTTTGTTTCAATCGCAACACCTCCATATTCTCAGCAATATA	Gh_A01G0402	intron	T	A					A01	6337330	6339687	-	0	0	0	0
330	TM330	A1	6343103	1	GTATTTTGCATTCCGAGAAGCTAGTTATGGTCATTTGACACTGGAAATCCAAAATAGGAC[C/T]CATGCATTCTACCATTGGAACAACAATAATGATGGGAAAAAAGTGGCAACTAACTCATTT			C	T
331	TM331	A1	6356201	0.988	CAAGTCAAATGTAGTTAAAGACATTGTTGAAAGAATTGCTATACCGCATCAACAGCTCCT[G/A]CATTGTGGCAGTTATCCGGGAAACCGTTGTTCTGTAAATTAAAAGAAACAGGCAGGTAAA	Gh_A01G0403	exon5	G	A	GCA	GTA	A	V	A01	6349622	6357369	-	0	0	0	0
332	TM332	A1	6365382	0.988	AAGATTTGAAAACCCGATAAAAGCACCTATTGGTGGTATTCAGTCTAATTTACACTGGTT[A/T]AATAGGATTTAAAGTTAAACCAAACTATTTTATATCCATTACAGATCCTCTAATAGAAGA			A	T
333	TM333	A1	6371380	1	ACTATCCTTCTTCCATCATCCAGAGTTTGTAAGTCTGATGTTGAAGTATATGACGAGCTG[C/T]TGTTACCAAATCAATCCTTGTTTGGGTCTGATAATAATTAAAATTATTATAACACTTGTC			C	T
334	TM334	A1	6395091	0.949	TGGTGTTGACGTGGCTGACATCAGCTGCAACGCCGGGAGTGTTAGCGATATCATAGAGAG[C/T]CAGTTGAGAAACAAGAGGGTTAAGCTTCATGAGGAGAGCCAAGGGCTGGCCAATCCCTCC	Gh_A01G0404	exon1	C	T	GCT	ACT	A	T	A01	6392538	6395256	-	AT3G15020	Lactate/malate dehydrogenase family protein	Q9LKA3	MDHM2_ARATH Malate dehydrogenase 2, mitochondrial OS=Arabidopsis thaliana GN=At3g15020 PE=1 SV=1
335	TM335	A1	6405002	0.996	TCCGAGTTCTTATAATACTGATTTGCTTTTGGGGTTCTCTTTTCTTTCTCCACAAACTCA[T/C]TCCCATTCCCAACACCATTGCCATTGTTACTCCGATCATTCTCTGCCACTGACACAGATA	Gh_A01G0406	exon1	T	C	AAT	AGT	N	S	A01	6403558	6405603	-	AT1G06230	global transcription factor group E4	Q9LNC4	GTE4_ARATH Transcription factor GTE4 OS=Arabidopsis thaliana GN=GTE4 PE=2 SV=1
336	TM336	A1	6410991	1	TAAAAGATACGAGAGGATCCATACCCATTTTGGGTTTTGAAGGTTCAAGTTATTGGGTGC[C/T]ATTTTTTATGATCTAAATGGTCAAACGAAAGAAGGAGGCGCAGAGAGTAACATATCTCAG			C	T
337	TM337	A1	6415524	0.988	ACAGGCATTAAACAAAAACTTACCTTATCTTTCAATTAAATACAATAAGCTACTAAGCTT[A/G]ACATCATTTGGCTAGACATGACAATCCACAACATCAACAAGGTGTGTTTAACATATAATC			A	G
339	TM339	A1	6428894	1	AGTCATGCCATCAATCTTTTCCGCCATTGTTGGGTTACCATGAGGTCCATGACCATAAGG[C/T]CTCGCTTCAGTGTTCATTACAAGCATCAATACAATGATGATGAACGACAGCATCACCACC	Gh_A01G0407	exon1	C	T	AGG	AGA	R	R	A01	6428720	6428983	-	AT2G31083	CLAVATA3/ESR-RELATED 5	Q8S8N2	CLE5_ARATH CLAVATA3/ESR (CLE)-related protein 5 OS=Arabidopsis thaliana GN=CLE5 PE=2 SV=2
340	TM340	A1	6576386	0.988	TATCATGTGACATCGCCAGATTCGGCCATAATGTCTAGGCCAGGTTTGGGGTGTTACAGG[G/A]CTGGCGTATTTGTAGTATAGTGTAATGCGGTAATTCGCTGTACAAATACTTTACAGTTTA			G	A
341	TM341	A1	6675312	1	CATTGTATCAGTGATCTTGTGAGGTCCGGCCTCATTTCCACGTGCAACAGTGGCCTGCAA[C/A]TCAAAAGAGTTGTCAGAACAGACTAGTGATCCTAAGAGCAAGCAGTTCCGAATAATAAAC	Gh_A01G0420	intron	C	A					A01	6675069	6678080	-	AT5G54080	homogentisate 1,2-dioxygenase	Q9ZRA2	HGD_ARATH Homogentisate 1,2-dioxygenase OS=Arabidopsis thaliana GN=HGO PE=2 SV=2
342	TM342	A1	6744548	0.965	TATTCTACTTTAGCCTCAATTTCTCTTGCTGTATTTTATCCAACCTGAGAATGAAATTTG[G/A]CTCATTTATAGTCTAAGGCCAAATAGGAACTATTGTAGAAAAAGAGCGTCCATGTGGGAG			G	A
343	TM343	A1	6822440	0.988	CATTTACCTTAATACCCTCATATTCTGCTTGTCTTGGGAAGGGTTCATTAGAATTTAGTT[T/C]AGTTTTTATCTTACCTATCTCAGAATCATCATCATCCACCTCCTCTCCTTGGGCAAGACA			T	C
344	TM344	A1	6834704	0.949	TACTAAGCATAAAATGCTTACTAGGTTTTATTTTCTCTGTTTTATAGTGTTCGAAAGCTC[G/A]CGGAGGTTGGAGATCGGTCAGAGCATCATCACACTATCCACTAGCTCGTTTTGGTATAAA			G	A
345	TM345	A1	6859500	0.988	CTTAGCATGTGTACCAATTTGAATGTACGGTCTGCTAACTTGCATATTAGCATGTCATAT[A/C]TGTATGTTGCATTACATCAGGGTTGGGTTGGTATTATTTGGAGGAAGTATTCTGAAAGGC			A	C
346	TM346	A1	6875910	1	TGTTAGTGCTCAGGTTGCCTCCCGAGAAGCGCTTATTTATAGTCTAATCTCGACTTACCT[T/C]TCTGGTGTGTGTTCATGGTGGCTCGAAGAGTTTACACTTCTTATCCCTGCTTTCAATTTT			T	C
347	TM347	A1	6913387	1	ATGTTCTACTCAAAGCTTGTTCGATGAAGAATTCGACCAGGCATCAACTGGATTAAAACT[C/T]GAAAACATCAAAACTGAGGATTCCAGATAACTATTTCTCAAAATGATCATACTTTATGTG	Gh_A01G0436	utr	C	T					A01	6913488	6916248	-	AT3G15140	Polynucleotidyl transferase, ribonuclease H-like superfamily protein	Q8W566	Y3514_ARATH Uncharacterized exonuclease domain-containing protein At3g15140 OS=Arabidopsis thaliana GN=At3g15140 PE=2 SV=1
348	TM348	A1	6970785	0.988	TACTCTGGGCCTCCACGGAATCTTCATATAACATTAGCAGAGGTGTATGGTTTTGAAGTT[C/A]GTCAAGTCATGATTCACGAACTAACTGTAGGTTTGTAATATCGTTGATTCCATTAAGGGA			C	A
349	TM349	A1	6977554	0.988	CAGGCGTACGGGTTCCGCATTATTGATACTGCCAGTGTACAATATTAATGAAATTACGCC[A/G]TTAGCCTATCTGGGACTACGGTTGGGGGGCGCATTTTAGCGGAAGAGATTAAGGGTGGGC			A	G
350	TM350	A1	6979741	1	AGCTCCTATTTGCCTCTTATCGAATCTCACTTCAGATTTCCCAATAGGCCTTCAAAATCC[C/T]AAGATTAATACCTCAAAACTACAAATAAGGCTTTAACAGATCTCCGCTGTCCACCATCAG			C	T
351	TM351	A1	6984057	0.935	CTTTGGGTACGATCCTCGAAATATTTCCAAGTGTTTCGTTGTAAACAAACTATATTACAA[C/T]TTGACCCGTATACTTGTAGACATCGTTGCTTAATTTATATCTTTTTGCTGCATTCTTTTC			C	T
352	TM352	A1	6993313	0.988	TGTTATCAACATTAATAACCTAAGGGATAAGGACAATAAATACATTCAAAATATTCTTAT[A/C]GAAATTACCTGTAGAAAAGGCCTCTCGCACAAATTGAAAGAGAGTATCTTTAACAGTATC			A	C
353	TM353	A1	7003375	0.965	GTGTTACAACTAGAAATGGATGGGTGTTAATTATGGCATTTATATCCATGCTCATGTTTG[T/C]AGAAGTAAACAATAACCATTTAATTTATGGGTTAGGTGTCATGCTGCCCTACAAAGTGCC			T	C
354	TM354	A1	7010531	0.949	TATGAGTTACTTGTTATTCAAGATTTGCAGGGTTGGTAAACTTGATATATAAGGCTCATT[T/A]TAAGTCCACACAGCCTGGCACATGAGCATGTGATTAGACCGTGTGAGCCACATGGCTAAT			T	A
355	TM355	A1	7014182	0.988	AAGCTGCTAATTTTGTTATTGTTATTCTCACATTTTACCTTTTCTCATATTTAAAAAAAA[T/A]TCCAATTCTTTTGCATTTGTGGGGTAATGTTGGTAATGCAAAGTGGGTAATCTCACATTA			T	A
356	TM356	A1	7017907	1	TACACATAAAATTCGTTAATGTAATCATACTGTTTATAACTCTTCCTTTTCTTTCTTTTA[T/C]GCGTTGGACATGGAATATGGCAGAGAAAGCAAAGATGGGAGAAAAAGAGTGGTATTTTTT	Gh_A01G0440	intron	T	C					A01	7017621	7019632	+	AT5G53950	NAC (No Apical Meristem) domain transcriptional regulator superfamily protein	O04017	NAC98_ARATH Protein CUP-SHAPED COTYLEDON 2 OS=Arabidopsis thaliana GN=NAC098 PE=1 SV=1
357	TM357	A1	7026010	0.988	CGGCAATATAAATTTCTTACCAAGTTCACGACGACTAGGTTCAAATCTTCTAGCGATTGA[G/A]ATACCATCAATTTGGTTTTCATATTTTTTTACATCATTTAACTCTTGCTCTTTTTTTTAA			G	A
358	TM358	A1	7076323	0.858	AAACCTGAAGGTTTATTTGCTTTTCCAATGAGCTTTAGTTTGATGTATCAATTATGTGTC[C/G]TTAAATTTTGATATTAACAGTATGCAATGCATAGTTGTACTCCATGCTAACAACTTCTTT	Gh_A01G0441	intron	C	G					A01	7075587	7077148	+	AT5G53940	Yippee family putative zinc-binding protein	Q9FN32	YIPL7_ARATH Protein yippee-like At5g53940 OS=Arabidopsis thaliana GN=At5g53940 PE=2 SV=1
359	TM359	A1	7105874	0.988	CTAACACATAGTCTTAAATTTTGTTCCTTGTGTTACAAGCAGCCTGACTTTTGGATCGAA[C/T]CGGAGAATGCAATAAGGAAAGGATATCGAATAACAGATCAGGACATATTGGAGAAAGCAG	Gh_A01G0446	exon3	C	T	CCG	TCG	P	S	A01	7104917	7106684	+	AT3G15260	Protein phosphatase 2C family protein	Q9LDA7	P2C39_ARATH Probable protein phosphatase 2C 39 OS=Arabidopsis thaliana GN=At3g15260 PE=2 SV=1
360	TM360	A1	7116102	0.935	ACTATCAACCTCAGGACTTCGGTATATAAAGAAACTTTATTGTGGAAATCAATGGCATGT[A/G]TAAGCTAATAAAGTAAATGATTCTGTGAAATGAATGTAGAGTTAGCCATTGGTATGGTTA			A	G
361	TM361	A1	7125641	1	CTCAAAGCTTGAGCTGGAAAAGCTATAAAATTGTCCGCCAGTTGGAATCACACCCTGCAA[G/A]TGATTATATGCCACGCTAAATTTTGACAAAAATGTAAGCTCGGCAAATGACAGCGGAATT	Gh_A01G0449	exon1	G	A	CAC	CAT	H	H	A01	7124396	7127554	-	AT5G53890	phytosylfokine-alpha receptor 2	Q9FN37	PSKR2_ARATH Phytosulfokine receptor 2 OS=Arabidopsis thaliana GN=PSKR2 PE=2 SV=1
362	TM362	A1	7166973	1	AGTCTTTCTTCCAAATTCCTATACTTTTCTTGAGCCTCGTGATCATTTATTTTCAACTTG[T/G]CTATTTCGACTGGATCATCTAAATCTGAAACTACAGGATTGGCAGGGGTTGCTCCGGGAT			T	G
363	TM363	A1	7232799	0.965	TCTTAGATTCTTGAATTTACGTGGTATTCAATTCAATTGGCCAAAAATCCCTTCGTCTCT[A/G]GGCAACTTAAGGTGTTTGCAAACCTTGGATTTAAGAATTTTTGGTCTTGTTGTAGATATG			A	G
364	TM364	A1	7313455	0.877	TGCCTAGAACGAAGGCAAGCCGATCACAAGCAGCATCAAGGAGAGGAGCAAGCCATGACC[T/G]TGCAGCAGTACGTGCAATTTCTGCAGCAGCCTCCGTTACTCCTCTACCCCCACCTCGGCC	Gh_A01G0459	exon6	T	G	AGG	CGG	R	R	A01	7312049	7320618	-	AT1G53140	Dynamin related protein 5A	F4HPR5	DRP5A_ARATH Dynamin-related protein 5A OS=Arabidopsis thaliana GN=DRP5A PE=2 SV=1
365	TM365	A1	7321914	0.988	AATGGTGTATACCCATAGAAGTTGATGGCACCTTGTATGGTTAAAAGCATTACTGAATCT[A/G]GATTCTAAAAACTACATTGCAAAACATCCTAATTGCATCTCCATCTTGTTGTATTCATTA			A	G
366	TM366	A1	7324199	0.935	AACTCGGCCCAATCTGGTTACATGTTTAAAAAATCAAAATTTTGATACTCTTAACAAAGT[A/G]TCAATACCTTGCCTAGTATCGATACCGTTTTAAGGTTCAATGTTTTGAAAATTAAATAAA			A	G
367	TM367	A1	7332331	0.965	TAAAATGTGGCAAATACAACAATAAGGAATCGTTATGTATAATGGTTACTACATGCTCAA[A/G]AGCATAAATTTCCAACATTCATCAATTGCATCCAGGTTTAATGTCTCTGCATGCAATCTA	Gh_A01G0461	intron	A	G					A01	7330042	7332935	-	AT4G27500	proton pump interactor 1	O23144	PPI1_ARATH Proton pump-interactor 1 OS=Arabidopsis thaliana GN=PPI1 PE=1 SV=2
368	TM368	A1	7339276	0.996	TTCAAACACATCCTGCCTGGTTTTCCCTTGCTAATTACAGTCCTGCTTCTTCTTGCTTCC[G/A]CATGTTGCTGAGCTCGCACCTTTGACAGATTCGCATCTTTGCATACTGTCTTCAGCAGGT	Gh_A01G0462	intron	G	A					A01	7337495	7340667	+	AT3G15350	Core-2/I-branching beta-1,6-N-acetylglucosaminyltransferase family protein	Q5QQ53	XYLT_DROPS Xylosyltransferase oxt OS=Drosophila pseudoobscura pseudoobscura GN=oxt PE=2 SV=1
369	TM369	A1	7380153	1	TGGATCATCAAAAGGTTCAGTTTCCACACCTCACGTACTGCCTACGGTTGCTGATTATAA[A/G]AATCCGTTTATTTTGAAGCTGCACGGCTTCTGGTACGAATCTTTGGGGGAACTTTGTATG			A	G
370	TM370	A1	7390732	1	TATGTCAAACAATTGTATGTCTATCTGTGAGACCTCAACTCTATCATTCGAAAAGACATC[T/C]GAATAGACTCCCCTTTACTTCGCTTGTTATGCTTGTGATCCTTGCCTTAGGTCAACTGAT	Gh_A01G0468	exon1	T	C	CTG	CCG	L	P	A01	7389042	7395110	+	AT4G21700	Protein of unknown function (DUF2921)	0	0
371	TM371	A1	7435191	0.976	CCCAATATGTTCGAACTAATCCGGCTATTGCACAACCCCCACCCCCGACTAATATAAACC[T/C]TGCACCTGTGGTACCTCCGATAGTCGACCCATTGAGATTAAGCAAGCCCCCGGTAGATAG			T	C
372	TM372	A1	7566595	0.935	TATTTATAGTCCCTCGTCAACTCATAAATAAAAAGATAATACGTTTTAACGCATTCGAAC[T/C]TCTAGCCTCCTACTTTTGACATAAATAGTTAAAATAAACCAGTTATTATACTGTGTATCT			T	C
373	TM373	A1	7609984	0.988	AAAAGCCATAACAAAAGTAAGAGAAAAGACACAGAAAATCACGAAAGAAACATAACATCA[A/G]TAGTAGCAGTGAAGAAGAATTGCATTCGGAATCAAAGTCAGACTATTCAGAATCCAAGGC			A	G
374	TM374	A1	7614666	0.988	AAAATTTTGTACATTGCATTTCCTGTAGAGTTCTAATTATATAGTTAGCCATTGGAACTT[C/A]AAAGGTTTTGAAACTGAGTAATCGAATAGCAGGTCAGTTTGTTTCCCTGAGTCTCGAGAT	Gh_A01G0479	utr	C	A					A01	7612024	7614399	+	AT1G63080	Pentatricopeptide repeat (PPR) superfamily protein	Q9C6S6	PPR67_ARATH Putative pentatricopeptide repeat-containing protein At1g31840 OS=Arabidopsis thaliana GN=At1g31840 PE=2 SV=2
375	TM375	A1	7622119	1	CTTCATGAAGGTATGTGTTTAGAAGATTTAAAGTACTCTGTCGATGCCCCAGTATGCAAC[A/G]TTCTTCGTTCTTTGTTGAGCGAGATTATCGAATGTTTCAAAATTTGAGTCGCCCTTTCGG			A	G
376	TM376	A1	7626548	1	CAGAAAGAACACTCAATAGCCTTTTCATTTGCCTCGACATAAGGGGCCTTGCTAATGACT[G/A]CTGCTATGATATTCTCCTCCGCATTGATGGTTACTAACCGTCTATCTGTCACTAACTTCA			G	A
377	TM377	A1	7630913	1	ACATGTACCTAAGGACCTGAATGTCTCTGCCAAAATCACAGGGACAGAAGTGACCCTTTT[G/A]CTGAGTCAATGAAAAAGATCTATAGTTGCCTCGTCCACATATCCCAAAGCCCTAGGGAAA			G	A
378	TM378	A1	7637096	1	CAAATTTTGGTATAATGATACCAAAAAAATAGCTAAATTGGGGTTTTGGGGGATCTTGGT[A/G]TCGAAATACCATTCCATGATGTCGCAATGCCACTAGAAAATGACTCAACTTCTTCGCTTC			A	G
379	TM379	A1	7640973	1	TTCCAAGCCCAAAGAAAAAGACAATTGTTAGGGATATGAAAAATAACATGTTGAATATAG[C/A]AACGGTAATGATGAAAATGGAAAACCACGAAATGGGAAGGTGAGACCCAACAACAACCCA			C	A
380	TM380	A1	7652713	1	TGCATTCCGGGACATCCTCTACGACCGGTTCCGAACGGAATGAGTTCGAAATCATGCCCT[C/T]GAAGGTCTATCTTCCTATCCTTGAATCTTTCTGGAAAGAACTCTTCGGCATTTCTCGACC	Gh_A01G0480	exon1	C	T	CGA	CAA	R	Q	A01	7652481	7652795	-	AT4G36220	ferulic acid 5-hydroxylase 1	Q42600	C84A1_ARATH Cytochrome P450 84A1 OS=Arabidopsis thaliana GN=CYP84A1 PE=2 SV=1
381	TM381	A1	7659678	0.988	TGTACTCAAACATTTTCAGGAAATATGGGTTATAAAATTTCGTTCCAATTTGAACCCAAT[C/T]GAATAACATCTTAGTGTCCCTATTATGGGCCTCGTACATTAAAAATGGTCCAGGATTAAA			C	T
382	TM382	A1	7663516	1	TGTCTCAAATATCGCAGCATGAGCTTCTTTGCACAAACTTCTTGAGGACTATTTTGATCC[C/T]GATATGTTTTTAGGAGATCTAGAGTACTTTTTTGATGCCCCAAGATGTAACGTTCCTCCT			C	T
384	TM384	A1	7672907	1	ATTCATCATCATATATGCTCTTTCGAGCCATATTCGGTAAGCACCTCCTGAGCTGATGAA[T/C]AGTAAGCTCTATTGAGCTGAAACGATAAACTCTTTCGAGCTGAACAGTAAGCTCATACGA			T	C
385	TM385	A1	7676148	0.988	ATTCCACCACAAATAAGCTTCACATTGCAGTAAAGAAACAGCATAGATAAGACATTTCCG[A/G]GGGGTACATTCTAGTTGTTGCAGAACTCTTTTAGTTGATTCCATCCAATTCTCTGCTGTG			A	G
386	TM386	A1	7681532	1	GACAGTTCCACCACTCCACCCTCAAAATTTTCAGTCACTGCAACTAGTGAATCTATTCCA[G/A]ATCTAGCATATGCTCATTTTGTCAAGCAAGACTGTACCCTTGCCTTATGGCTTCTGTCCA			G	A
387	TM387	A1	7691062	1	GCCAAGAGACGGAAACAAGATCGTCACGGAGACAAACATCCAAAGACTATGTGGGAAGAG[C/A]CTCATATCGAGATTCTTATTCATTAAGGAAGTCGAGTCGGAATGATGCAAACCACAAGTT			C	A
388	TM388	A1	7696508	1	AGTAGCTTAATTAAGTTTATTAATAGCTCAACTAAGCTGAATGTGTGTGTCCATTCGGCT[A/G]GGGTTTGTCTCATGCCTATAAATACTTTGTTTCCAGCTTGTTGTAGGGACAACTTTTTGC			A	G
389	TM389	A1	7700431	1	ACAATCAAGTTCTAGTTTTGGAAAAAAATTAAAACTCTGTTTTTTTCTCAAATCTATTTG[T/C]TGCTGCGTTTTCCAACATCTACCCATGGAGTCATCTTTCCTGTTGGAATTTTTTATGACA			T	C
390	TM390	A1	7707142	0.996	TCGCTTGCATCGACAGTCCATGTCTAGCGTGCTTCTCAAGCTATCAAAGTTTCCAAGACG[C/T]TCCCATGCATGTAAAGTTGCATTTATTTGATATCTGCATTTTCAGTTTGATGTTAGGGTA			C	T
391	TM391	A1	7717405	1	CCTACTAGGGATGCCAGAAATAGATGATAAGTGAGTCCGGAGAAGACTAAGAGCTTCCTT[C/T]GGTTCGAAGTCACGCAAGTCAAGAGACATAATTTCTTCATCACTGCAACTGAATTCAAAA	Gh_A01G0483	exon10	C	T	CCG	CCA	P	P	A01	7716781	7721074	-	AT3G15390	silencing defective 5	0	0
392	TM392	A1	7748612	1	CCAACCAATACACCAGTTTGGCACCCAGTGCCTCATCGGATAAATTCGAAGTAATAACTA[T/C]GCCTAGTGCTATATAAATTGACACTCGGTGTCTCATCGGTTAAACCGAAGCAAATTGGCA			T	C
394	TM394	A1	7838126	0.996	ATTGATCAAATCTTAAAATTTTTGGGCAAAACTGTAAAATCTAAAAACAGGGGACACACA[A/G]TCGTGTGATCGGACCGTGTGGAAAGTCTTAGACTGTATGAAGGGATACACGGTCATGTGA			A	G
395	TM395	A1	7848364	1	TTGCATTGGCTTATTTACGGTAACCATTTTGGCATTTGAGCTTTGGTCTTCCCCCGACGG[G/C]TTTGGTTTCGAAGTTGCATTTCCTTCGGTCTTTTCGATTGGGGTAGTCTGCAATTCTTGA	Gh_A01G0495	exon8	G	C	AAC	AAG	N	K	A01	7847932	7852415	-	AT4G27430	COP1-interacting protein 7	0	0
396	TM396	A1	7940161	1	CACTATTTGTTTTTTTCTTTTTTCTCTTTTTTGCAGGTGGCGATGGAGGCAACGGTGGGA[C/T]GGAGAAGGGTGCCCTTGCCATTTTGGTGAAATGGAGGCAAGGGCGCATCAGGCCTCGGGA			C	T
397	TM397	A1	7943054	1	TTGGGCCTTTGCCCAACCGGATATAGTTTCACAATTATATTAGAGCCTTGGCCCATACCA[A/G]ATATAGAATGCAAACACAGTAAATCAGAATCCTACCCATCAGCCTCTACACACCATCTCC			A	G
398	TM398	A1	7950112	0.988	TACGGTCTTTGGTTGGCCTACAGTGACCGGTTTTGAATAACTTTTTATTATACACATTCG[A/C]GCTATTCACTTCATTTTCTTTCTTTCTCGGGGTTGATCTTTTGACGTTTTCTTCCGCGTC			A	C
399	TM399	A1	7954159	1	TGTCGAATCTACAAGAAAAACAACGCGAATAGACCTCTGGAACATGATAAAGATGACTCC[G/A]TGGACGACATGCTTGGTACTGTACCACCTTCAATATCAATCAGTAGCCAACATAATCCAA	Gh_A01G0497	exon3	G	A	GTG	ATG	V	M	A01	7953380	7954596	+	AT3G15510	NAC domain containing protein 2	Q8GY42	NAC25_ARATH NAC transcription factor 25 OS=Arabidopsis thaliana GN=NAC025 PE=2 SV=1
400	TM400	A1	7958856	0.965	GTCAAATTAGGCTCCCCATCACGCTTAAAGAGCTTGTTTCCAAGTAATTTATATGTTTTT[T/G]CCGTATTTTTGCTTAGTTTTTGTTCTTTGCCTTAAATGGTGTGTTTTATGCCACTTTTGA			T	G
401	TM401	A1	7961396	0.965	CAATGGCGTTTTAGTCCACATAACAAACTTTAATGCAAAAATGTCAATTGAATTAGGTCA[A/C]TGGTCGACGACAAATCCTAAGCCTCTAAATAGATAGCTCTAAACATTTTATAGACAGTTT			A	C
402	TM402	A1	7964109	1	TGTGAATGGCGATAACTCGCCTATTACACTAGCAGTTCAGCTGCAAATTTTCTGGAAAGT[A/G]TCTTATTGACACTAAGTGGTGCGTAGGGTTGGATAGGAGTTTTATACCCCATATGATAGT			A	G
403	TM403	A1	7966290	0.935	CCCAACTATTACACACTCCACACTGCTACTCATCTCCATTTTTTTTTATTACAAAAATTG[C/G]CAAATATCACTACATATAGGTAAGAAGATCGTTTGTAACATTGAGCTTAGGTTATTGGAT			C	G
404	TM404	A1	7971877	0.988	TGGTGGTTATTTACTATTGGTAGAGTTTGAATATCTAACTTATAATATGTAAGTTAGGGA[G/C]AGATGGTACCACTCTCTAGAGAGTTAGAAGACAAAATCTTACCTTATCTAAGGATAGTAC	Gh_A01G0499	utr	G	C					A01	7972749	7981395	+	AT5G54440	CLUB	Q556Z3	TPC10_DICDI Trafficking protein particle complex subunit 10 OS=Dictyostelium discoideum GN=trapcc10-1 PE=3 SV=1
405	TM405	A1	7974070	1	TCTTCTTCCATAGGATCTTGATGAGTTCAAGACCATTCTTAAGCCACGCCTGAAATTAAT[A/T]GTCCAAAATGATGAGCGTGAATGGTTTATTGTATTTGTGTCTAGAGCCCATCCCAACAAT	Gh_A01G0499	exon3	A	T	ATA	ATT	I	I	A01	7972749	7981395	+	AT5G54440	CLUB	Q556Z3	TPC10_DICDI Trafficking protein particle complex subunit 10 OS=Dictyostelium discoideum GN=trapcc10-1 PE=3 SV=1
406	TM406	A1	7977264	0.949	GGGAGGCAAATCGGCGAAGGGCTTCCCTTTCTGCTGGAAACACATCTGAGATGTTTGATG[C/G]CAAACTAGGCTTTGCTGATGGGTAAGGAAATCGCAAGAATCCAGGCAATGTTGCTTTAGC	Gh_A01G0499	exon11	C	G	GCC	GGC	A	G	A01	7972749	7981395	+	AT5G54440	CLUB	Q556Z3	TPC10_DICDI Trafficking protein particle complex subunit 10 OS=Dictyostelium discoideum GN=trapcc10-1 PE=3 SV=1
407	TM407	A1	7983656	1	TCACTTTATACCTGGTTAAATGATGGTGCTGGATTTCCTTGACAGACTATAGCCAAGGTG[T/C]TGCTACATGCACGCAACAAGGTTATCTTCTCATGAAGCATAGGAGGCTCCAAGTGGTTAT	Gh_A01G0500	exon5	T	C	AAC	AGC	N	S	A01	7981780	7984701	-	AT1G09270	importin alpha isoform 4	Q71VM4	IMA1A_ORYSJ Importin subunit alpha-1a OS=Oryza sativa subsp. japonica GN=Os01g0253300 PE=1 SV=2
408	TM408	A1	8015331	0.935	ATTATCATGGGTTCAATTGAAGGAAATATAACTCTAAAAATAGTTCGGGGGACTATTCAG[G/A]GGCTAAACTAATTAAATCATAAAATTTTGGGTAAACTGTAAAATCTGAAAAAATAAAGGT			G	A
409	TM409	A1	8027142	1	ACTCTATATTGATGTATGATTATGATGCTATAATGATTGTGAAATGAATGTTAAATGTTT[T/C]GATATGCTCGGTAATGCCTCGTAACCCTATTCTGATAACAGATACGGGTTAGGAGTGTTA			T	C
410	TM410	A1	8187881	1	AGGATACGGAAATCCATAATGGATTGAGCAAGGTACCTACTGCATTACATGTTTACTTTG[A/G]TAGCAACTGCATCCCCCTACAATACCAGAAATTGTGCAAGATTAGCATCTGTGTTACCAA			A	G
411	TM411	A1	8196667	1	TCTAGAATTTCCTGTTACTTTCTTTGGTAGTTGAATCTCCAATTCACCTTGGTCGCCGAT[A/T]TGCCAAGAAGCAATAGATAGTATGTGAAGACAAAGAATGGCAGCAAACACCAGGATTTCT	Gh_A01G0515	intron	A	T					A01	8189193	8197864	-	AT4G32010	HSI2-like 1	Q5CCK4	VAL2_ARATH B3 domain-containing transcription repressor VAL2 OS=Arabidopsis thaliana GN=VAL2 PE=2 SV=1
412	TM412	A1	8261345	1	TAACTTTAAGGTTTTCTTTTCGAAGTCTTGCTTTATTATTTCCAATTCGGAGGGGACCAC[C/T]CGCAGATATTCCTCTATCGGTCGAGCTTCTTCTAAATTTGGCCTCGGGATATTATCGTTA			C	T
413	TM413	A1	8297393	0.949	ACAACAAAGTGTGTTCATGGACCCAGCTCTTGGATCTAGCTCGTACGAACCAAGAGAAGG[T/C]CACGGTCTTAATTCGCATGTGTTCAAGGAGCTCGCAGAAGAGAGACCACGTGCTTTGCAG			T	C
414	TM414	A1	8314681	1	AAAATGGTAATGAGAAAACGCTCCACGTAGGGCGCGTTTTCAATGAATATTTCTGACATG[T/G]CACTAAAAATGCGCCCTATGTGGAGTGTTTTCCCTCTACCAAATTCAACACGTGCAAACT			T	G
415	TM415	A1	8454484	1	GACACACGGCCAAATCACACGCCCGTGTGTTAGCCATGTTTCTTATACGGTCTAGTCACA[C/T]TCTCATGTGTCTGGCCGTGTGAACTCCAAATGAACCTCAAACATCAAGTTTATCATACCC			C	T
416	TM416	A1	8457972	1	GACTCGAACTTGGACGAATACACGGATCCAACCAAAACATACTAATTTGGCACCCAGTGC[A/C]TCATCGAATAATTCGAAGTAATAAGTTGACACCTAGTGTCTCATTAGCTTAACCGGAGTA			A	C
417	TM417	A1	8466795	1	AACCACTTGATTTTCAGCATCATCTTCCTCTTCCCCTCCTTCTCCTTCATCATCATCGTC[A/G]TCATAATCTTCTTCTTCATCCTCATACTCTCCCTCCGATGACTCCTCCTGCTCCGTCGTC	Gh_A01G0531	exon1	A	G	GAT	GAC	D	D	A01	8466139	8467100	-	AT4G27310	B-box type zinc finger family protein	Q9C9F4	COLX_ARATH Putative zinc finger protein At1g68190 OS=Arabidopsis thaliana GN=At1g68190 PE=2 SV=1
419	TM419	A1	8501299	1	TCTGTCACAATTATAAAGAGCTCCAAAGCTCATCGCCGCATAGGAACTAAAAACTCCATC[G/A]GGATTCTCCACGACTGCCATTACCTGTTTGACCACGACCGTAGCTACCACCAGATATAAT			G	A
420	TM420	A1	8513728	0.988	GTGGCTAGGGTTTTTTTGTTTCTGACAAAAGGTTGTGGGATAGTTAGTGGGTTAGGGTTT[A/G]TTTAATTTGGGCTGGTAGTTTAGGTTTTATTTAGGCTTGGGGATGGGTTAAATATTTGGG			A	G
421	TM421	A1	8518607	1	ATTGAGAGAAACTAGCTAAATCGTGAAACAAGGGCTATTTTTTGAAACTAGCTAGTGCCA[G/C]ACAACTATGTGTCAAGTCGTGTGGTAGACTATGTGGAGCACATAACTGTATGAAATCTTG			G	C
423	TM423	A1	8550692	1	CAATGATGAGAGTGGAGGAGGATACTCCGGTGGTGGTAGAGGTTCATTAGTCCATAAGTC[A/C]TGCGCCAAAAGAATATTATATCTGGTGGTAGCTATGGTCATGGTCGAGCAGGACATGACA			A	C
424	TM424	A1	8552950	0.976	CGGACGTGTCGCACGCCTGTGTTACATTCTCAGTTTCAACCATGGTTTCAAGGCACGGGC[G/A]TGTCTCATGCCCATGTTGTTTTGGCAGTTTTGCCCACGGCCATGTGACATGGCCGTGGCA			G	A
425	TM425	A1	8556822	0.965	AATTAAAGGATTAGGAGCATCGAATTCACCAAATCTAAGGAGAAATCATCAGTAAATGTG[T/C]TAAGCATGGGATAAAAATATGTATAAATTACGGTTTATCAGAAATGAGCAATAGGCTCAA			T	C
426	TM426	A1	8559119	1	CTTTTGAGGGCTTCTAGGCATTCCAAAGCCTATAAATACACCCTAGAGGAGGAAGAAAAA[A/G]GAGACGGAGAATAGGGGGTAAGGAATTACTCCAAAGAAGCTGATTGATCCATCTCAGAAG			A	G
427	TM427	A1	8565040	1	CACATTAACGGGGAGGCGAGAGAGCACTGGCGTTGTCAACACTCACGATACATACTTCCT[A/G]TGGAGCATGAGGTAGGGGCACATTTTTTATCTCGCCTACTTCATTGCCTTGCCTTTCACC			A	G
428	TM428	A1	8570070	1	CATGTTTTGGCTTTGATGAATCCCTGATGGGATTGGTTATTTTGCTAGCTGTTGCGGATG[T/G]GTTAACTGATGTGGCATCAGTTTTAGGCGGTGGCACAACATTGCAAATTCTGTACATGAA			T	G
429	TM429	A1	8579889	1	GACATACAGGGAGGAAGGAAGGAATTACTCGAAGGAAGCTGATTGATCCATCTCAGAAGC[C/T]GGATTCATCATCAAGACTGTAGATCTCCCCTCAATTTCCCTTCAGGAGTTTTGCGTTTTC			C	T
430	TM430	A1	8588405	0.996	CTTTCAACATCATCCGCTAATGCTCTCTCCGGAGGGGATTCCATTTACTAATCGAAACCA[C/T]AATTTCAACCATCAGAAGTCATCACACTATCATATACTAGCATTTTGGTATGTATAGTTA			C	T
431	TM431	A1	8591557	1	TATAGTTTATGACTAGAAGAAACCCGTCAGGACCACTACTTTTTGACGAAGAAATCGATC[A/G]CACAGTTCGTAGAAATGAAAGAGAAATAAGGCGAAGCTTAAGATACACAGAGAATGAGCA			A	G
432	TM432	A1	8595431	1	GCGTCATCTTCTTCGGGTCCTACCGTAGAATTTCGTCACCCTTTCTTGAGGTTCTCCATC[A/G]AGCCCCAAGAAAAACTATTCCAAATAATCCAGGCTCAACCTTTAATTGCGAGCCGCTGCA			A	G
433	TM433	A1	8604236	0.976	AAGACCTCATTAGTAGATTGATGATTGATTCAAATGGACGGCTAAGACAGTTTTCATGGT[C/T]GGGAAATGAGTGGGATGTGTTGAACTCCCAACCTAGAAACGCTTGCGATGTTCTTGCTTA	Gh_A01G0533	exon1	C	T	TCG	TTG	S	L	A01	8603431	8607035	+	AT1G11300	protein serine/threonine kinases;protein kinases;ATP binding;sugar binding;kinases;carbohydrate binding	Q9ZR08	Y4230_ARATH G-type lectin S-receptor-like serine/threonine-protein kinase At4g03230 OS=Arabidopsis thaliana GN=At4g03230 PE=3 SV=3
434	TM434	A1	8611292	1	CTGGGCTAAATCCATTTTACACGTATTCTTCGGGAGGGCTGTATCAGAATAGGATCACCC[G/A]TCCAGGCTAGATCTTTTTTACCGTCAATTCCTTTTCAGAGATCCACCGAATTTTCCTTTC			G	A
435	TM435	A1	8617910	1	ATTCAAGAAGAAAAGACCAAGGCTGATCGATGGGAAAGAAAATTTCGAGAAGCTCAGGTA[T/C]GAAATGAAGATTTAGAGAAAAGTCTGTCGGAAAGCAGAAATGAGCGAGGTGAATTAAAGG			T	C
436	TM436	A1	8643651	0.988	GCTAGCAAGCAGGTAGGTTTGTATGTATACAAGCAAATAGCACGTGATGGGTTGAAGATA[A/C]GGAATTTTCATGGCAATAATGAGCTAAAAAGTTGGAAACTAGTTCTGTTGACATCTGCTC	Gh_A01G0534	utr	A	C					A01	8640487	8643505	+	AT1G11300	protein serine/threonine kinases;protein kinases;ATP binding;sugar binding;kinases;carbohydrate binding	O81833	SD11_ARATH G-type lectin S-receptor-like serine/threonine-protein kinase SD1-1 OS=Arabidopsis thaliana GN=SD11 PE=1 SV=1
437	TM437	A1	8659310	0.965	GTTTATGAGTACATGCCTAACAAAAGTTTGAACTACTTTATTTTCGGTTCGAAACCTACC[T/A]TCTCAGCACTTCTTTTTCTCCCCTTCCTTCCTCGCCCCCTGGTCTTGTAGTACCCATTTT	Gh_A01G0535	intron	T	A					A01	8657291	8660267	+	AT1G11300	protein serine/threonine kinases;protein kinases;ATP binding;sugar binding;kinases;carbohydrate binding	O81832	Y4729_ARATH G-type lectin S-receptor-like serine/threonine-protein kinase At4g27290 OS=Arabidopsis thaliana GN=At4g27290 PE=3 SV=4
438	TM438	A1	8663617	1	TGCATTCTTTAAATTATACTTCACTCGTTATTTAACCATTCTGCACATTATAAATTTAAG[A/G]GCACATTGATTGAGGGGCAAGAAATAGCAGTGAAGAGACTTTCAAAGAATTCGGGACAAG	Gh_A01G0536	exon5	A	G	AGC	GGC	S	G	A01	8662105	8758347	+	AT1G11300	protein serine/threonine kinases;protein kinases;ATP binding;sugar binding;kinases;carbohydrate binding	O81832	Y4729_ARATH G-type lectin S-receptor-like serine/threonine-protein kinase At4g27290 OS=Arabidopsis thaliana GN=At4g27290 PE=3 SV=4
439	TM439	A1	8672568	1	ATTCCAAGAGTCGGTACGTGGGAATTTGGTACCAGAAAGTATCAACTGGGACTGCTGTAT[G/T]GGTTGCCAATAGGGAAGCTTCAGTTTCTGATGCTTCAGGAGTTCTAAGCATCAATGACAA	Gh_A01G0536	exon9	G	T	TGG	TTG	W	L	A01	8662105	8758347	+	AT1G11300	protein serine/threonine kinases;protein kinases;ATP binding;sugar binding;kinases;carbohydrate binding	O81832	Y4729_ARATH G-type lectin S-receptor-like serine/threonine-protein kinase At4g27290 OS=Arabidopsis thaliana GN=At4g27290 PE=3 SV=4
440	TM440	A1	8680893	1	CTACACACTCCTATGTAGCTAGTTTTGTTTCTGAAAATTTAAGGATTTCTGTTGAGAGCA[G/C]TTCTAGTGAGGTTACTGTATTGAGTTCATTGGGGCAGTCTGTTTGGGTTAGTAAACTTTA	Gh_A01G0536	intron	G	C					A01	8662105	8758347	+	AT1G11300	protein serine/threonine kinases;protein kinases;ATP binding;sugar binding;kinases;carbohydrate binding	O81832	Y4729_ARATH G-type lectin S-receptor-like serine/threonine-protein kinase At4g27290 OS=Arabidopsis thaliana GN=At4g27290 PE=3 SV=4
441	TM441	A1	8685354	0.988	AAGCATGATAACTTTCATTATATATGTCTGATTGGGGTGGGATTTATATATGTGGAGGAA[A/G]TGTTCTATATAGCGTTCATCACCTATATTCTGGCAACTTGGCTTCACTTTATCTGATATG	Gh_A01G0536	intron	A	G					A01	8662105	8758347	+	AT1G11300	protein serine/threonine kinases;protein kinases;ATP binding;sugar binding;kinases;carbohydrate binding	O81832	Y4729_ARATH G-type lectin S-receptor-like serine/threonine-protein kinase At4g27290 OS=Arabidopsis thaliana GN=At4g27290 PE=3 SV=4
442	TM442	A1	8691499	1	AGTTATGAGGACAAAACCGATGAAAGCAGCCTGCATTTTTAACATCAACTCGGTTGCTAT[G/A]CTTTCAAATCAGGTAAAACTTTTGAATAAAAAAATTAATAGTTTACCTGGTTCTACACAG	Gh_A01G0536	intron	G	A					A01	8662105	8758347	+	AT1G11300	protein serine/threonine kinases;protein kinases;ATP binding;sugar binding;kinases;carbohydrate binding	O81832	Y4729_ARATH G-type lectin S-receptor-like serine/threonine-protein kinase At4g27290 OS=Arabidopsis thaliana GN=At4g27290 PE=3 SV=4
443	TM443	A1	8693954	0.949	AGGAAGCACCACAGGGCCGTGCGATGTAGCCGTGTGGGTCACACGGTCGAGACACACGGG[T/C]GTGCCCGCAGGCCGTGTGGGATACTGACTTAAAACATCAACCCATAAGCATAAACCATGA	Gh_A01G0536	intron	T	C					A01	8662105	8758347	+	AT1G11300	protein serine/threonine kinases;protein kinases;ATP binding;sugar binding;kinases;carbohydrate binding	O81832	Y4729_ARATH G-type lectin S-receptor-like serine/threonine-protein kinase At4g27290 OS=Arabidopsis thaliana GN=At4g27290 PE=3 SV=4
444	TM444	A1	8698426	0.976	CTTTTCTGAATTGGACACAACTTAGGCTCGGCAGGGACAAGCCCGTGGCACACGCTCGTG[C/T]TCGATTACTTCAGGCCGTGTTCAAGCCTGCCGAATTGACACAGCCATGTAGTCTGCCTGT	Gh_A01G0536	intron	C	T					A01	8662105	8758347	+	AT1G11300	protein serine/threonine kinases;protein kinases;ATP binding;sugar binding;kinases;carbohydrate binding	O81832	Y4729_ARATH G-type lectin S-receptor-like serine/threonine-protein kinase At4g27290 OS=Arabidopsis thaliana GN=At4g27290 PE=3 SV=4
446	TM446	A1	8707061	0.899	TCCATTCATTAGTTTTGGTAAGTGTTAATTCTGGCACTTGTTTGTAATTTAGTGATTAGC[A/T]TTGTTTTTCTAAGTTTGGTAATCTATTAAATTAATCTCGATATTAACCCTCTTTTTTAGC	Gh_A01G0536	intron	A	T					A01	8662105	8758347	+	AT1G11300	protein serine/threonine kinases;protein kinases;ATP binding;sugar binding;kinases;carbohydrate binding	O81832	Y4729_ARATH G-type lectin S-receptor-like serine/threonine-protein kinase At4g27290 OS=Arabidopsis thaliana GN=At4g27290 PE=3 SV=4
447	TM447	A1	8716577	0.877	GCCCTCAAAATTAGCCTTTTCCGTATTGGACTCAACTTGGGCTCGGCAGAGACACGCCCG[T/C]GTGCGATTACTTTAGGCCGTGCTCGAGCTTGCCAAATTGACACGGCCGTGTGGTCTACCC	Gh_A01G0536	intron	T	C					A01	8662105	8758347	+	AT1G11300	protein serine/threonine kinases;protein kinases;ATP binding;sugar binding;kinases;carbohydrate binding	O81832	Y4729_ARATH G-type lectin S-receptor-like serine/threonine-protein kinase At4g27290 OS=Arabidopsis thaliana GN=At4g27290 PE=3 SV=4
448	TM448	A1	8720763	0.9	TTCCACACGGACGTGTCGGACGCCCGTGTTTGTTTTGGCAGGTTCGACCACAACCATGTC[A/G]CACGGTAGTGGCATTTTATCATAGCCCGTGTTTGGTAAAATCGTTGCCCTATTTTCACAC	Gh_A01G0536	intron	A	G					A01	8662105	8758347	+	AT1G11300	protein serine/threonine kinases;protein kinases;ATP binding;sugar binding;kinases;carbohydrate binding	O81832	Y4729_ARATH G-type lectin S-receptor-like serine/threonine-protein kinase At4g27290 OS=Arabidopsis thaliana GN=At4g27290 PE=3 SV=4
449	TM449	A1	8726685	1	CTCCTCTTCTTTTCTTTTTCTCTTCTCTCCAACCACTTATTCTTTTCTTCTTCTTTTCCC[T/C]ATAGCCGAATCCTTCAGCCACCCTACTCTATACCACCTTCCTTCCATTATTTTTAAGACT	Gh_A01G0536	intron	T	C					A01	8662105	8758347	+	AT1G11300	protein serine/threonine kinases;protein kinases;ATP binding;sugar binding;kinases;carbohydrate binding	O81832	Y4729_ARATH G-type lectin S-receptor-like serine/threonine-protein kinase At4g27290 OS=Arabidopsis thaliana GN=At4g27290 PE=3 SV=4
450	TM450	A1	8731210	1	CTACATCAGTTAGAGATTTATTGATCAGAAACGTAAAGAGTTTCTTGAGCTTAAGTAAGG[C/T]CGTAAGTCTGTTACAGAATACGAGCGAGAATTTGTAAGGTTGAGTCAGTATGCCCGTGAA	Gh_A01G0536	intron	C	T					A01	8662105	8758347	+	AT1G11300	protein serine/threonine kinases;protein kinases;ATP binding;sugar binding;kinases;carbohydrate binding	O81832	Y4729_ARATH G-type lectin S-receptor-like serine/threonine-protein kinase At4g27290 OS=Arabidopsis thaliana GN=At4g27290 PE=3 SV=4
451	TM451	A1	8740230	0.965	TGCCCCTAGGCCTTGGCAAAATGACCATTTTACCCTTATGCCCAAAAATCAATTCTTATC[A/G]AATTTCTTCAAATTTAAAGCCTAGATAAACTCTTTTTACTACTAGATCAATCCCAAATTC	Gh_A01G0536	intron	A	G					A01	8662105	8758347	+	AT1G11300	protein serine/threonine kinases;protein kinases;ATP binding;sugar binding;kinases;carbohydrate binding	O81832	Y4729_ARATH G-type lectin S-receptor-like serine/threonine-protein kinase At4g27290 OS=Arabidopsis thaliana GN=At4g27290 PE=3 SV=4
452	TM452	A1	8743457	0.858	TTTTAATTAGAAAGAGATTTCAATTAATCAATCTAAAGTCAATTGTTCTTACTCACGAAA[T/G]AGATATTAACATAATTTAGGGATTTATACGGATCAAGACGCAAGTGAATAAATCATTTAA	Gh_A01G0536	intron	T	G					A01	8662105	8758347	+	AT1G11300	protein serine/threonine kinases;protein kinases;ATP binding;sugar binding;kinases;carbohydrate binding	O81832	Y4729_ARATH G-type lectin S-receptor-like serine/threonine-protein kinase At4g27290 OS=Arabidopsis thaliana GN=At4g27290 PE=3 SV=4
453	TM453	A1	8745557	0.935	GTATGAAAATGACGAAACGGACAGACTATTCAATTACTTTGCTTTTTCCCCTATATAAAT[T/C]TGAATTCCTCTTTTCTTGATCTATAAGCTTATTCCACTATTTATTAAATTCATTCCAAAA	Gh_A01G0536	intron	T	C					A01	8662105	8758347	+	AT1G11300	protein serine/threonine kinases;protein kinases;ATP binding;sugar binding;kinases;carbohydrate binding	O81832	Y4729_ARATH G-type lectin S-receptor-like serine/threonine-protein kinase At4g27290 OS=Arabidopsis thaliana GN=At4g27290 PE=3 SV=4
454	TM454	A1	8757819	0.988	TGTTGATTTTGAAGTTCTAATCTAGCATTTATTTTTCCCTGCAGTGGTTATATGTCACCT[G/A]AATATGCCTTGGATGGGCTTTTCTCAATGAAATCCGATGTATTCAGCTTTGGAGTTTTGG	Gh_A01G0536	exon13	G	A	GAA	AAA	E	K	A01	8662105	8758347	+	AT1G11300	protein serine/threonine kinases;protein kinases;ATP binding;sugar binding;kinases;carbohydrate binding	O81832	Y4729_ARATH G-type lectin S-receptor-like serine/threonine-protein kinase At4g27290 OS=Arabidopsis thaliana GN=At4g27290 PE=3 SV=4
455	TM455	A1	8761267	1	ACGTGTCCAATAAAGTTTTGCCGACGGTCTGGATGGTAGAATCCTCTGTTTCTTTTCCCA[T/C]TCACTATTTCTAAAACTAAAACTCTAAAGCTGAAAACATCGGATTTGATCGAGTAAAGTC			T	C
456	TM456	A1	8773582	0.996	TCGATCGAGTATCACCCAGGCAAGGCTAATGTGGTAGCCGATACTTTAAGTCGTAGAACC[A/G]TATCTGATCTGAAAGCAATGTTTGCTCGTTGTAGTCTATATGATGATGGCAGTTTGCTGG			A	G
457	TM457	A1	8792701	0.996	GATGTTTCTTAGAAAAGGAAGAGCGTACCCATGAGAATGTGCGTCTATGAAGGGATAGCC[T/C]AGCTTTTGTATCTTAAGAACCTATCAAGTGTATGAGGAAACTGTAGAAGACTTAATTATC			T	C
458	TM458	A1	8797147	1	AATTGATTGCCCAATTAAATTTATGTGACAACCAAACACAATACCAACTATATTTTATTC[T/C]GATCATCTCAACCATATGGTGTGACCCTGTAGGCTCTTGTAACGTTAGCAGTAATACTAG			T	C
459	TM459	A1	8803205	1	TGGGGATCTGAGGTCGTCTGAGGTCCTCAGATCCCCATTTCCAAAATATAAGAGGGAACT[G/A]TCACGGTAGGAGCCTCCGCCCTCGCGGAGTAAACCGCATACCCCAGTCAAATAAAACCTC			G	A
460	TM460	A1	8815942	1	GATAAATATTTACAAATTCGTTTTTCAAAAACAGAGACCCAAAAATACACTTTCTGATAC[T/C]CGTTACTATCGGGTCGTTACAACTTAACTTTGGAAAGCCATTTACAACCATCAGTCTTCA			T	C
461	TM461	A1	8827003	0.965	CATTTCCTCCTTAGATGGTACAATATCTCGAGCATACTTACTGAGGTATACAAAATCTCT[T/C]TCATATTCAGCTACAGATCGATTTTCCTGTCATAAATCGAGAAATTCCCTCTTCTTCTTA			T	C
462	TM462	A1	8836526	0.988	ATCCTGATTCAAGTTCAGAACACAACAGTTGTTTGGTCAACTAATTCGACAGCAAGAGTT[T/C]AGAATCCAATATTGCAGCTCCTGGATTCTGGTAATCTCGTTGTCAAAGATGGAAAGGATA			T	C
464	TM464	A1	8853211	0.988	TATGTATCAGTATTGGTCTGTTTTAGTGTATCATTTTGAGTTTATCTGTAACACCCCTCA[T/C]CCGTATTCAATGCCAAAATAGGGTTACAGAGCATTTCCGAACTTATAACACAAATAAACG			T	C
465	TM465	A1	8857559	0.988	ACTGTTTGGTGTAGGTTTAATTATGTTAGTGGGCCTTTAGAAGGCCCAAGCTTAAGATAA[A/G]ACCCAGTAATTTTAAGTGATTTTAATCCATAGGGAAAAGGGGTTCTGGTCAATTGGGCTT			A	G
466	TM466	A1	8859983	0.965	TGCTTTCAAAAACATAAATTGATTTCAACGTAACACGATTACAAGCAAGGCTTCCGCTAT[A/G]ATAACATTTTCCAAATTCAAATATTTTTTTAAAACGAACATAATTACCTTGGTAACCTAA			A	G
467	TM467	A1	8867495	1	CGAGACCTCCATGTACTGAGTCCAGCATCTAGAATCCAGAACTATACTTGCAAGGGGAAA[T/C]AGAAGAGGGGGTGAGCTACTCGAGCTCAGTGTGAGATCAAAGCCAACTACTACAGAATTT			T	C
469	TM469	A1	8883489	1	ATCCCCTTATTAGGTTTCACCCTAATCTGGCAAAATCTTTTCACCCTATGTCTAGGCGCG[T/C]AATCAACTCCGCTTAATTATGACAAATGTACTCTTAGACAGGGTCTATTCCTCCTCTGAA			T	C
470	TM470	A1	8886871	0.935	AGATGATTTATTCACTTGACTTGATCCGTGAGACTCCCTAACCTATATTATTATCTATTT[C/T]GAGACTAATAACGTCTAACCCTCAGTTGAATTAATCAAAATCTCTTTCTTAATTAAAACC			C	T
471	TM471	A1	8889219	1	GGGTATTTATAGATTTTGGGGCACACGGCCAGGGCACACGCCCGTGTTCCCCAATTTCAG[T/C]CCGTGTGATTCACAAATTTCAAATTTGGGCCCGTTTGACATTTAGTGCACGCCCGTGTTC			T	C
472	TM472	A1	8900270	1	TTTCTTCTCTCCTGGCAGTTCTAAGAACCGCTACCTGGGAATCTGGTACAACAACATCAC[C/T]GGGCAAACTATTGTTTGGGTTGCAAACAGGGTAAACCCAATAAACGATTCCAATGGCTTG			C	T
473	TM473	A1	8912099	0.949	AGTTGCCATTCATGCAATGGGGAACCCTTCCCGTAAAGTTCCAAGCTCACGTGAAGTTGC[A/G]AGCTCAAGCAAATATGCGAGCTCACCTAAAGCTGCGAGCTTAACTAAAAGTGTGAGCTCA			A	G
474	TM474	A1	8914420	0.965	TTCAGGAACGCAAATTTTCTTGGCCAAGAAATTGTCCAGGATTTCAAGAAACGCGAATTC[A/G]TATAATTCGGTCCTTAAGGATTAGACCCTACTTCCCCTTTACTGTTATTTTTACTATTTT			A	G
475	TM475	A1	8917366	0.965	TGGAGGGGTTGTGGGATTGGTAGGAGCAACATGCGGTGGCTAAACATGGAGTTTAATCCC[G/T]TAAGCCGGACACTTTTCAGGAATATTTCCCTTTAGGTAATAGTAACAAACTGCAAAAGAT			G	T
476	TM476	A1	8921281	1	CAAGAGAGGGTGATGAATTTTCGTGGTTGGACCCGTGGAATATGACACTCCCTTCTTCGA[A/G]ACAAGTACGATGGTTTTCTTTCCTCATGAAGACGATATGGTACCTGTGATCAAGAACCAT			A	G
477	TM477	A1	8923538	0.996	GGTAAGTTAATATGTAATTATTTTAAGAGTTTAAGGAATTTACCAAGTTGTTAATCTGAG[T/C]GATCTTTCCTTGTCGCGTTGGGGTATGGCACACGAGGTTTATATTCGACAGTCACTGGTT			T	C
478	TM478	A1	8927052	1	AAATCTCTACATTTACTAATAAAAAATATGCCTCAAAACTTCTAAAGTATCTATTTTTTC[T/C]AGCACCAGCTTCAGGCCATATATCGCAAATGTACGTCTTTCTTTTAGTGTAATTGAATGC			T	C
479	TM479	A1	8936910	0.915	ATTTAATTGGCCCAATTAGCCCAACTTATTTTCAGCAGCAGAGAAACCCTAGCTAGGGTT[C/T]GCACCGCAATCAGCCTAAGGGTTGCGCCTTTTCAACTCCCGTTGTTTCAGCTGCCCTCCA			C	T
480	TM480	A1	8939851	1	TAGTGTCAAGCAGAATAATCTCCAGGAGCTTAAGGAAATTTGGGATCAGTGGGGCAAAGA[G/A]ACCAAGCAGTTATTCTACGGTAATTACGGAGAGTTACTGTACTTGCTTGATGTTCAGATA			G	A
481	TM481	A1	8944940	1	AGTGAGAAGAAGGATCGTTTTGGTTTGGGTTTCAAGCCAGACCATAAGCACATGAGGCAA[G/T]AAATGGAGAAGCGCCAAGTGAGAAGAAAGACGCGTTTGAAGGCATTCCCACCTATATCCA			G	T
482	TM482	A1	8949054	0.965	AAGCTCAAATTTTGAAGAGTACACAATGATCTTGCTATAAAGAGCGAAGAATGCTGCAAA[C/T]TGGGGCATCAACAGAGTACTTGGGATTTTTTTTAACACATGTTGAATTCAAGAAAGACTT			C	T
483	TM483	A1	8951331	1	CCATCAGCGCCGTGACTCTACCTCCGTAATCAGGTGTGAATCCACACCAACACGATCACT[A/G]CCAGATTCCTCGATGATACCTGCAAGAAAAAGAAACAAACAGCAGATACGCGAAAAAAGC			A	G
484	TM484	A1	8962244	0.965	TGTTGTATTATTTGAATTGTGCTAGGTTTCAGTTCAAAATTATTTGCGGCAATAGCAGGT[C/T]TAACTATACTCGATTCAGTTCCTGTTAAAGTATGTTTAGCATAATCATACATAGTGCGTA			C	T
485	TM485	A1	8976173	1	TAATTACTCTGACAATGATGCAGTATCCTATAACTCGGATTCGACGATCAAATCAGGTAT[A/G]AGGTGTTATATATTGTCTATCTTAGTGTGAGAAACAAGTAAAATAAGTTGACAATGAACA			A	G
487	TM487	A1	8989947	1	TTGAAGGAATTCTGAGAGAGATCTTCAGTCTTGGAGTAGGTCCGGCTTTTGGGATGGATC[G/A]TCTAGCTTCCTTCAAGTAATTCCTGGCGCGTGGTCCTGTATTCCAGAAAAGTTCTGGAAA			G	A
488	TM488	A1	8999148	1	TCACTAAGCTTCATACTTCTTCTCGGTAAATTGTTCAAAAACCCCAACAATGGCTCTAGG[T/C]AGCTTGGTCTGCTTCATGGCCTGCTTCATGGTTTGAATGTAAGCCAGCTTCAACACTTTT			T	C
489	TM489	A1	9011621	1	ATCGGTGTCAGAAACTCATTTCCAGAACATCGAGACAGCACTTAAGAATCAACAAGCGTC[G/A]ATCCAAGGGCTCGAAACTCAGATAGGTCAGCTTTCCAAACTAATTTCTGAACAACTACAA			G	A
490	TM490	A1	9013890	0.976	AAACCATCATACCTGCTTCAAAGAAGAGGAAAGGGGCGTCCTCTTCTGCGGGTCCAACTG[T/C]AAAAATTCATCACCCTCTCCTACAGTTTCCCCGAGGGCCCTAGCAAGAACTGTTCCAAAT			T	C
491	TM491	A1	9020762	1	GCCTGTGTGTCACGTTCCTAGCCCGTGTTTTTCCTAAAATTTTAAGTCAGTGTTGCACAC[A/G]GTCATTTGACACGCACATGTCCCTAGGCCATGTGGTGCGCACGGCCATATGCACGTTCAT			A	G
493	TM493	A1	9030492	0.988	TTTCGAATAGAACTAGGCTTGGGTTCGGCAGAGACACGCCCGTGTGGTGTCGTTTAGGCC[T/C]TGTTAAAGCTTGTTAAATAGATAATGGCTTGTGGTCTACCCGTGTAAGGAAGTTCAGGCT			T	C
494	TM494	A1	9034704	0.935	CTTGCGCCACACTACATTACTAGATGAACATGTGTAGAGCCAAGTAAACTATTAATTTTT[A/C]TATTCAAAAGTTCTACTTGATTGGAAAGCATAGCAACCGAATCAACGTTAAAAATGCCGG			A	C
495	TM495	A1	9036808	0.996	AATTAAACTTGTGCTCGACAGGGACACGACCGTGTACCATGCCTGTGTGAGGGTGTTCAG[A/G]CCGTGTGCAATTCTGACTTGGTTTAATGTCGACATGGCCATGACACAAGGGCGTGTGGCC			A	G
496	TM496	A1	9041138	0.935	TAAGAAAAATCCTCAATTCACAATTAAAACCCCTATCCAAATTGCATTAACTCGATCTAT[A/G]GATTTCCCTATTAGATTTGACTCTAATCCAGTAGATTTATGTTGTCATATTTTTAGCATT			A	G
497	TM497	A1	9058898	0.996	AGCTTACTCCCTCCTTTCCATTTCTTTTAGTGTTGTCAGGTTGGCTCGGGGTTGGAGATC[G/A]TCGGAGGTACCATTACACTATCAAATTATCAATTTGGGGTATTGAAAGTCTTAAATTTTT			G	A
498	TM498	A1	9061586	0.996	TGACAAAGAAAACAATCCCTTGACTCGACAATGGAACTCAGCTTCAGATTTGCTGCAACT[A/G]TTACGAGCCTTGCCACTCGACCTCGAGCATGTAATGGCCTAAATTCAAAGTTATCGGAAC			A	G
499	TM499	A1	9086778	0.976	GAGAAGCAAAATCCAAGGGTTTCAAGGGTGGATTGGTTGTGTATGGGGTCGTGAAGTCCA[C/T]ATGAGTGGCCCACACACTCTTGTGGTTTGGGCTAGGTTAGGTTTTGCCTCAATTTTCTCA			C	T
500	TM500	A1	9094931	1	CACTTTTTATGCTATTACAAGTGGTTGCCTTTTTTAGGGACCCTTATGTAAATGGCTGTG[G/T]GGAGCTTTTGTAAGACCAAACCGATAGAGATGTCCACCAATTTCCCTACTTAAAAATACC	Gh_A01G0543	utr	G	T					A01	9090712	9094611	+	AT4G27270	Quinone reductase family protein	C4XGC2	NQOR_DESMR NAD(P)H dehydrogenase (quinone) OS=Desulfovibrio magneticus (strain ATCC 700980 / DSM 13731 / RS-1) GN=DMR_02110 PE=3 SV=1
501	TM501	A1	9102523	0.896	TTATGATCTTGAAGCATCGACCTGAAACTAACCTCACTCTTATCCCCACGCCTGTTAAGA[C/A]TACAAAAGAACATAACAAAAATTAAAACTTTAAACCGACAATAAACATATAAACATATCA	Gh_A01G0544	intron	C	A					A01	9100896	9102924	-	AT3G20640	basic helix-loop-helix (bHLH) DNA-binding superfamily protein	Q8GXT3	BH123_ARATH Transcription factor bHLH123 OS=Arabidopsis thaliana GN=BHLH123 PE=2 SV=1
502	TM502	A1	9110192	0.935	CTAAGAAAGTTGATATTTGATGCTTTAGTTGTATCACAATCTCATAGGGTGCAAGAAACT[A/G]AAGTAGTTATTTGGTGTGATGGTGGCGTTATACAAAGAATTGTGAAGAAATTTGAATGAA			A	G
503	TM503	A1	9115082	1	CAACCCGTATAATCCTATACAGATTCAACTTGTGCGGCAAGATCCATACCACAGGGGCTT[T/C]TCCCCCGTACCCCGGTTGAGTTTAGTGGTCTCTATTTTATTTCTTTAACAAGTGAGTTGT			T	C
504	TM504	A1	9119691	1	CCTAGCTCCAGTTAGATAAACCAACGATAATTGCGCCCAGCGCTAGTTGGATTAACCGAC[A/G]GTTATGTACCCAGTACTAGTCAGACAAGTTGACGAAGATTGCGCCTAGCGCTAGTCGAAC			A	G
505	TM505	A1	9123138	1	GTTGCTTATATAGGTCAATCCTCAACAAACTAGCATTAGAGCTATGGTTCAGCTTTCTCA[A/G]ATCGACTCGTTCGATGGAATAACAATGTTTTTGGATATCAAAAAGTTCGACGGAGCACAA			A	G
506	TM506	A1	9131614	0.935	AATTCATTATTGCCAATATTATTGTTTCATCACAAATTAATCATTAAACTTTAGATAGAT[A/T]TACACCTATTCAAAATTCGGCCATAATTCACAAGAACATTCTGTAGTCTTAGTAAGAGGG			A	T
507	TM507	A1	9138841	0.996	GGCTGCAAAACCTGCAAGATTACACTCGTCTTTAAGTTCTCGTGGTGGATTAGCCACCCA[G/A]TCATTAAAGCAAATACTCAGCTTTCCTAGCCATTTAATCTGTCACATGTTACCTTCTCAG	Gh_A01G0545	utr	G	A					A01	9133963	9138467	+	AT5G54520	Transducin/WD40 repeat-like superfamily protein	Q64LD2	WDR25_HUMAN WD repeat-containing protein 25 OS=Homo sapiens GN=WDR25 PE=2 SV=3
508	TM508	A1	9146923	0.988	TACACACTGAAGCAAGCATGCATTTATGCAACACAACACAACATACAAAAATAAATGCCT[A/G]AATTTTGGGGCGTTGCACCCTTAGGTTTGCTTCTAATTGGTATTTATAGACTTTAAAATG			A	G
509	TM509	A1	9154436	1	CCTCAGTAATAATAATAACGTCCTGTTACTCATCTACTATACTCTGTTGACTCTGCCTTG[C/G]TTCTCTATGGTTTCTACGCGTTATACTCTCAATTTCACTATCAAACAGTAATGGTACCGG			C	G
510	TM510	A1	9158659	0.988	ATGGGTTTATTATGATTGGAGGAAGTGTACTGTACTGGTAGCTCTGTTGCAAATATTGTT[C/T]AGTGTCGCAACCGGTGGTATTTTGGAGTGTAGGGATGGGTGGGTTGATTTTATCCCCACA			C	T
511	TM511	A1	9163739	1	TACCACAGGACCGTGTGGCCTCGACAGAAAGGTTTTTGACTTTTGTCGAAACCTCGTTTT[T/C]TGTATTTTTGGGTACACACCTGTATCAATTTCGTTGCTAACTCAACCCCAAGCCCTCTAG			T	C
512	TM512	A1	9166929	1	GTCATCAGGTTGGAAAGTTTGGCTACTACCTTCAAAGTCGCAATACCAAACCCTGTAAAT[C/T]GCGACACCCACCTGACATACTTTGAAAACTTTCAGTTTAGTCCTAGTTCGATCCCAGGAT			C	T
513	TM513	A1	9170527	1	GTGGAGAGATTTGAGGAGGGAATCGTGGGAAGCTGAGGGGAGAGGTGTTGAACCAAAATT[G/A]GACTATTGGCACACAAAGAATTTGGCTTTGGGAGGGGAAGAATTCGGCTATGCAAATCAC			G	A
514	TM514	A1	9177984	1	CATTAGTGCGAGTGCTGGAGAAGGGTTGAGGCATGTTTTAGGTGCAGATCTTTGGAGCAC[A/G]GTATCAAAGATTGCCCACAAAGCCCTGAGTAGGTGCAAGCTATTGGTCTAGGTAATGTAC			A	G
515	TM515	A1	9183254	1	GTGTGGTGATTATTGGGCTATGCTGTGTAGTCCATATTGCCAAGGCCATTTTTGGGTTTC[T/G]TGGGCACACGGGTGTGTGGGTTCAGATGGGCTGTATTACGGACCTTAGGCCCATTTTCAC			T	G
516	TM516	A1	9187614	1	CGTGAATTCTCTTTTTGCAATAAAAACAGGACCAGCCCGACTGTGCGAAATTTGTGCAAC[T/A]CCCAAACATACAACTGATTCATGCCCTAGTTTATGTGACAATATTATGGCCCATTTAGAT			T	A
517	TM517	A1	9197612	0.935	TGTCCCAATTCTACTAAAATTAGAAGGCAAAAACATGTCAAATGGGCATATTAACGCAAC[T/C]CAATTTCATTTAAGTTGTTTTAAATTTTTTTTGCAGGTTAAAGGGAGAAAGAAGAGGCAG			T	C
518	TM518	A1	9203019	0.996	TTGAAAAGGAAATTTATTCTCGAACAAAAATGAAGGTCGGTTTTAGGTCTACGTCAAAAT[C/A]AGAGTAAAGTAGGATTCGGGAGTCGGTTACGCACGAGGAAGGTATTAGCACCCTCGCGAC			C	A
519	TM519	A1	9207497	0.976	TGTTTTTCATATATCCCTTTTTCGTCACGATTTTCGTGATGATCTGCATTCATTACTTCT[G/A]CTCCTGACTTCCTCTTTAGGCCTTGTACCCGTCCTCAAGTTTCACGAGTAATCAATGTTT			G	A
521	TM521	A1	9218510	1	TTGGATGGCTCATATGGTTCACTATATGCGGTTTTGGTTCTAGATGGATACTCGAATCGT[C/T]TGTACTATCATTTACTAAGATTAGTACAAAGCCTCGGTCATGGCCTATCATAGGCTTACG			C	T
522	TM522	A1	9222556	0.935	ATATGCAAATACCATTCAACATTTACTCAAGTTACCATATGCAGATGTTTACATATCTAA[G/T]CTGAACAATGCCAAAACACAAGCACATACTTTACATTACAAGCATTTAACCTTCATATGT			G	T
523	TM523	A1	9231361	1	AAAAATGAAGAAGAAGAAAAAAGGAGAGGCCAAGGCGAAATCCTGAAAAGGGCATCTTGA[T/G]ACCAAAGAGGTTTTGAGTTGAAAACCCGAGAAAAGGCAACTCAAATTTTAATCGAAGATG			T	G
524	TM524	A1	9238416	1	AAAAAAAATATCAGAATCATGCCAGAAGCACCTAAGAACACACACAAACCTACTACAGAT[T/C]ACAACCTGGAACTGAAGAACAAGAAAACCCTTCAGTTCATTGAGGATGTGACTTCAAACG	Gh_A01G0546	exon1	T	C	TAC	CAC	Y	H	A01	9238374	9240450	+	AT5G54510	Auxin-responsive GH3 family protein	Q9LSQ4	GH36_ARATH Indole-3-acetic acid-amido synthetase GH3.6 OS=Arabidopsis thaliana GN=GH3.6 PE=1 SV=1
525	TM525	A1	9240577	0.965	TGCAATCATCTTAGGTAAAAGTTAAATGAAGCCATTCTAGATTAACCATCCCCTCTCATG[A/G]TATCATGTTTCTTTTCCTTTCAACTTATCTTATAACTGTCGCGTTTAATATGCATAGGGA	Gh_A01G0546	utr	A	G					A01	9238374	9240450	+	AT5G54510	Auxin-responsive GH3 family protein	Q9LSQ4	GH36_ARATH Indole-3-acetic acid-amido synthetase GH3.6 OS=Arabidopsis thaliana GN=GH3.6 PE=1 SV=1
526	TM526	A1	9248582	1	ACGTAAATCATAAGTCGATGCCAACGTCCCAGACATGGTCTTACACGAAAACACATATCG[A/G]ATCCTATGTCATGACATATGTATCCTAACTATTCCTATGGTTCGTACAGGGCTTTTCGGA			A	G
528	TM528	A1	9261412	1	AGGGCATATATGGGGTTTATTAGCTTCGGGCTTTACATTTCTATTAGCCTTTAAAGCCCT[T/G]CATTCACGTGCAGTTTCTAAAGCCTTTGGGCTTAGCACTTCAGTACTCTCTGTATTGTGG			T	G
529	TM529	A1	9267624	1	GGATACGATATTTTGGACTCACCATAACTATACTACCATTCGATAGGTGCGCTTGCCTTA[G/A]TCGTGGTCGTAATCTAGTTCAGTGAATCATAAAACGATCATCATCTTTTAAAATAACATA			G	A
530	TM530	A1	9270476	0.935	AACTCACTAGAAACTTTAACATAAGTCTTTATAGCAGGTCCTTAGCTTTTATCACTTGGA[G/C]CTTCATTAACTTCTTAAGTTAAAATTAAGAAAATTAAACATATCAGATCATCAATCGATC			G	C
531	TM531	A1	9278661	1	CGAGATAGCACTTAAGAATCAACAAGCATCGATCCAAGGGCTTGAAACTCAGATAGGCCA[A/G]CTATCCAAACTAATCTCCGAATGACCATAAGGTAGCTTACCAAGTAATACTGAACCTAAT			A	G
532	TM532	A1	9285908	1	CCCAAAACTCCTGAAGAGGAATTGAAGAGAGATCTTTAGTCTTGATGATGAATCCGGCTT[T/C]TGAGATGGATCAATCAGCTTCCTAGGAGTAATTCCTTACCCCCTATTCTCTGTATCCTTT			T	C
533	TM533	A1	9294919	1	ATAATTATGCAATGTATAGCTAAACTCACATACGCTACGTTAGTCCTAGAACTGATTAAA[T/C]CGTAGCTCAGATACCAATAAAATGTAACACCCCTAACCCATATCCATCGCTGGATGAGGG			T	C
534	TM534	A1	9297123	1	TTACCTCGGACAACGAAAACCTGGTACAAATCGACTAGTCGACAACTTTCGATTTCCCCC[G/A]AGCCAAATTCGATTTCTTTGGTTCTTGATCTTAATCTACCTTGAACAAGGCCGAACCCTA			G	A
535	TM535	A1	9300487	0.935	TCTTCCGGAAATACATCCGAAAACTCACAAACAACAGGTTTAGATTCCATATTTTATTCT[A/G]ACACTTTCGTATCTAATACATATGCGAGGTATACATCATATCCCTTTTTCAAATATTTCT			A	G
536	TM536	A1	9306834	1	CATATGCTAGGAAGTGCCACAAGAAGCTTTGTGGCTGTGGTCATGATAGGAGAAATGATT[T/G]AGAATGCCATAAGAAATGGAAGGATAGATGCAGGAGAAAGTGCTAAAAAGTCTACGCCAC			T	G
537	TM537	A1	9308942	1	TCTTTTGTCTCAGGAGGGATTATTTATCCTGAATGAGGGATGTCAAAGAAAGAAAGCGTG[G/A]AAGGAGAATTGGAAAATGTGTACACCAATGCCACATTTGAAAAGACAATTAAAGATGGGA			G	A
538	TM538	A1	9316217	0.949	CAATGAGGATCCGCGCGTCAACCCTAATAGTAGGCCGGATTTGCGCCTTTTCATTCGAAA[G/C]GGGAAATTTGCGCGTTACGTCCTTCCATTTGCGCGAGCCTGCAATTGCGCCTTATTCATT			G	C
539	TM539	A1	9327082	0.988	CCACATATTGTGTAAAATATTTCCAAATATTTTAAATCATTTGAAACAGATCTTTTTTGA[A/C]ATTTAAGTTCAAAAGAAACCGAATTCCACAGCCGAGTTTTGTAACCTGGTTCTGATACCA			A	C
540	TM540	A1	9333572	0.988	ATGAGTTCGCCCAAAGCATCTAGGTTGGTTGAATACTTAACAGAAGAGTTTGCTAAACCA[G/C]AAAACCCGCCAAAACTAAAAGTTCGCCAAACGGCATATACATATTATTATATACTTAGCC			G	C
541	TM541	A1	9339577	1	CTTTTTCTTTTTTCTCTTCGGCTATAAAAGCGAAGCTGCGAATCAGTTGTAAAAGAGGAG[G/T]ATACACATATTGAATGCAAAGAGCAGAGGTGATTTCATACTTTTCTTTCCGATTTTTTTA			G	T
542	TM542	A1	9348542	1	ACGTTCATCGCTAAGGGAAGCAAAATTCTGGTGCCGAAATTGTCCAAAATCACGAGGATG[A/G]GCCTCTAGTTGACGATTGGAAAAGGGGCCCTACCCGGAAGGGGACTTGGGAGACATCTGC			A	G
543	TM543	A1	9353916	1	AAAAAATGCTTAAGGCATCCTTGCTTGTTATTCACCAGAGCCTTATCACTGACTTATTAT[A/G]CTGCTATCTTGTTCGGCTGGTATTCTTGACAGAAAACGCAAAGAAACAATCACATTCTGC			A	G
544	TM544	A1	9358595	1	TCTACCTAAGGTGAACTCTCAAGGTTCGCTATATGTAGCTCGATTCTAGAGAAAGGGTAC[C/T]TGAACCAGCAGATTCCTCAATTCTCACCCATTATAGGCTCATATGAATCGAGTTTGATTC			C	T
545	TM545	A1	9361065	0.988	AAATGGGCCCGGGCAAAATTGGTTGACTACACTTTCATTCGTCATTCATAATCATACCAC[A/G]CATATAAATGTTTCGAATTCTTTTGATTCTTTGTATCTGCCTTCATCCTCATAACAGGTC			A	G
546	TM546	A1	9366735	0.935	CTTTTTCTTTTTTCTTTTCGGCTATAAAATCTAAGCTGCGAATCAGTTGTAAAAAAGGAA[T/G]ATACACATATTGAATGCAAAGAGCAGAGGTGATTTCATACTTTTCTTTCCGATTTTTTTA			T	G
547	TM547	A1	9369073	1	CTCGAAATAATCGAATATCACTTCAAAATTTCACTCATGTCTTTTAAAATTCTTCAAAAC[A/G]AAGACGAGATTCGATATTTAGCAATTCGCGGAATCGTGCCCTAACATGTTGGGTTGCAAT			A	G
548	TM548	A1	9371217	1	ATTTCAAGATTGCCTTCAATGTTGTGACACAGCCTGATGATGTCACGACACACCTTTGAA[G/A]ACACCTTGAAAATGAAGCATACTTCCCTCAATGTCGCAACACAGGACTTGGTGCGTCGCG			G	A
549	TM549	A1	9383153	0.965	GTTGCGACATGGCTCATTGACTAATGATGTTGGAACATAAAAACCATGATGCGATGTTAA[C/T]TCACATATTTTGAAAACTTTTCAGTTAAGTCCTTAACCGACCTCAGGTCAATAAAAAAGC			C	T
550	TM550	A1	9397449	1	GTTAAGTACGTTGGCTCACCCTTAGGCCTCATTCGACCCCTAAGTTCATAAAATGACTCA[A/G]TTTACACTTTTTATTGAATTAAAACTAAAATAGAAAAACTAACTAAAACATAATATAATC			A	G
551	TM551	A1	9400075	0.965	CATCTTTTTGGGACCTACTATCTATTATTACTGAAACTTTACCTTAGTTTCATAATTTAT[T/C]CATTTTAGTCATTATGTACCAGCCATATCAAAAGACTCTAGTAGAGGAAGATACATGCAA			T	C
552	TM552	A1	9438467	1	AATAACCCAGATGGCTTACCACCGCCACCATAACTTCTTGTAAATATGCAGATGGTGTAA[A/C]ACGAAAGAGCCCTAAGGGACTATACACTGAAAAATATGAAGATGGTTTAAGGAAGCATCA			A	C
553	TM553	A1	9447384	1	GATGAGTGAACGCATTAGTGCTGTTATTTACTATGATGGTGAGGTTCGTCACACCGAGAA[C/T]GATGTTGTTTTTTTTCGGAGAATACAATACGACTGGTTTTTAACCAGAACATAGATTTAA			C	T
554	TM554	A1	9510779	1	TTTCTGTTGTTAAGGCTTTCTGTTGCTAAGCTTTTGATTTGTTTACTTTTTGGTAAAGGG[A/G]AAGAATTCAAACCCTCCATTAATGTCAGTAGTCACAACACACGGCCACAGGAATTATAGG			A	G
555	TM555	A1	9617017	0.965	TGTCACCTATCATAATAAGCAACTAAGGATAAGGGATTTGTAGGAAATCTTAGCGATTCC[A/G]ACGGTAGGTGTTTTTGACGACACAAAACATTTGGTGGTTTTTTTTAAAGAGAACATCCGG			A	G
556	TM556	A1	9691902	1	GGATCTGACACGAGATAAAACTCTGAAGAGGTCTCATTCACACCTATCCCGATAACATAC[C/T]GGGAGCTTTATCAAAGTTTATTTAATGCGCACGCAATAGCTCCTTTTCATTTGAAACAAC			C	T
557	TM557	A1	9712091	1	GTTTACCATTTTGGAGGGACATGAAAGGAAAATATCACCCCAAATACTAGGATGATAGTT[A/G]ACGGAGCGACGATTGACGTTGGACATGGAAGACATTTCTCTACCTAGTAATTGAGTTTGA	Gh_A01G0555	exon1	A	G	GTT	GTC	V	V	A01	9709776	9712126	-	AT5G23960	terpene synthase 21	Q6Q3H3	TPSGD_VITVI (-)-germacrene D synthase OS=Vitis vinifera GN=VIT_19s0014g04930 PE=1 SV=1
558	TM558	A1	9715997	1	CAATCAACTAGTCAATACGCTAGTAGGATCTTTTGTAACAACCCGTTTCTAGGTCAAATC[A/G]GAACAGTGATTTCAGGACCACAAATCCGAAGTCAAAATAGTTATTTTATTATTAAATAAT			A	G
559	TM559	A1	9721742	0.9	GCCGAAGTAAGTTGGTATCTAGTACCTCATCGAATTTATCCAAAGTAATAGTTTGACACC[T/C]AGTGTCTTATCGACTCGTGGTCGAAGTATCCCTGAACACTTCCAATCCTATGGCATGCCA			T	C
560	TM560	A1	9726645	1	CTTATGAAGGATTTTCAGCCATTGGATTAGTCCATATTGCCATAACAAATTTGCATAATC[A/C]TTTCGTCACTTCACGTCCTAGACCAAGGCCTAATCACCTTAACTATTCATTTTACCATCT			A	C
561	TM561	A1	9734028	1	CTCTTCGCTCTCCTACTCCTCTTCTTCTTACTCTGGATGCATTGGCTCAAACATGTCTGG[T/C]ATGTAATTAGGTACCTTAATATTGTTTTTTGTGCGAATTTCTCAAAAATCGGGTCCAACT			T	C
562	TM562	A1	9739550	1	TTGTCAGCTTCATTGTTGTCATGGTATATAGCCTCTAATGCATCTTCAATCTCTTTTTCA[G/A]AGTGGTAATTCACACCCAATCTTTGGACTGCATCGATTAGGGGCAACTTTTGGGTTGAAG			G	A
564	TM564	A1	9745486	1	ATCATATACTTGGAAAATTTTATGGGCAGCCAAAGGGCTACTGCTCTCAGGTCTAAGCTG[A/G]AGGCTTGGTGATGGAAGTAACATCAAAATTGAAGAAGATGCTTGGGTTCCGAATGCTAAT			A	G
565	TM565	A1	9756363	1	TGTTGATGATTGTGTTCTCTTTAGGGAAGCTACAGGGAGAGGAGCTGGGTTATAAAATAC[T/A]TTCTGAGAGAATACGAAAGTTGTTTGGGACAACGCATCAACTTTGACAAATCGCTCATTT			T	A
566	TM566	A1	9777758	1	ATGATTGCAATACCCTCTCCCCAAAATAACCTCACTTACAAGGCGGATAATCTCTCCAAA[T/A]GAATATCTAGAATAATAACCTGAAACTACCCAATAAAAATGTTACCAAGATCAATCGTAC			T	A
567	TM567	A1	9796474	1	GTTTGTATAATCATCACCGAGACATTCATATCACATTTTCATTTACCATCTTACCATATT[A/G]CTGTTATGTCGAGTTTTCAACCCGAGGGTTAAGTACATACCTGTTCAAAGTATCCATTTC			A	G
568	TM568	A1	9802077	1	CTTATTTTGTCCACACGGGCAGAGACACAGGTGTGTGTCTCAACCGTGTGTGACACACGG[A/C]CTAGCATATGGGTGTGTGGCTTGGTCATGTGTCCGTTGCATCTTAAAAATTCAAAACAGA			A	C
569	TM569	A1	9809304	0.899	TGAATTTATATAGCATGAGCTTTTTCCTTTATTTTCTTTGCTAATTCGTTAATGGTGTCA[C/T]GCATGCAGGGATTTGCAGAAAGCAACTTATAATTTTACAACACTAATAGGACAGGGAGCA	Gh_A01G0557	intron	C	T					A01	9808481	9811958	+	AT5G54590	Protein kinase superfamily protein	Q9LFV3	Y5157_ARATH Probable leucine-rich repeat receptor-like serine/threonine-protein kinase At5g15730 OS=Arabidopsis thaliana GN=At5g15730 PE=2 SV=1
570	TM570	A1	9813136	0.9	TCTCAATTCCTCCTTCTCTCTCCCCTCTTCACGTAAGTTCTTTTGTTTTTTCCTCTCAAA[T/A]TTTCACCTCATTTTTTGCTCTAATTTACACATTTTTCTTGTTTTTTTTCAGTTCTTTGAA	Gh_A01G0558	intron	T	A					A01	9813000	9815081	+	AT5G54600	Translation protein SH3-like family protein	Q02764	RK24_TOBAC 50S ribosomal protein L24, chloroplastic OS=Nicotiana tabacum GN=RPL24 PE=1 SV=1
571	TM571	A1	9817502	0.988	AAATATGAAGAGGTATTTTTTAGATTAGGTCGTTATGCATAGGGTATGATAGCTACCAAA[C/G]CAGATAAGTGTGTAAGGTTTAAGGATGGGCTTCGATATGATCTAAAGATTCAGGTCGCCC			C	G
572	TM572	A1	9820565	0.965	AGTACTAAATAAAATTTATAGACGATATCCATTAGAAGTTCAAAATGAAATATTTTTAGC[T/C]GATCTGATGTAGTTACCGTTCAACGAGTTCAATTTGATTTTGGGAATAGATTGGTTAGTC			T	C
573	TM573	A1	9826701	1	AGTGTCACAGCACATCCTTACTTTTCTCAGCGTGTTGGAAGCATGTCTGGATCAAACATC[C/T]GTGCCATCTGTTGGTGCATTATAACCTTCTTGATTTGTGATTTGTCCTTCTGTGAAGAAC	Gh_A01G0559	intron	C	T					A01	9824395	9827292	+	AT1G65290	mitochondrial acyl carrier protein 2	O80800	ACPM2_ARATH Acyl carrier protein 2, mitochondrial OS=Arabidopsis thaliana GN=MTACP2 PE=1 SV=1
574	TM574	A1	9834896	0.988	TGGTGTAACGGAAAAAAATATTCCGGCTATCATCAACCATGGATTCATGTACAAGGAACG[A/G]ATCGGGTTGAAAAAGAGTTGAAGATATAACTTTAGGATCTGATTTCTTTTTGCGATGTTG			A	G
575	TM575	A1	9841748	0.965	GTTGGCATCGATTTGAGATTTACATGTAAGACCATGTCTGGAACATTGGCATCATATATG[A/G]TTTTGTGTAAGACACTGTCTGGGATAGTGGTATCGATAATTGATTACATGTAAGACCTCG			A	G
576	TM576	A1	9844694	0.935	GCAAATTGAGGGATTGAAATGTGAAATAAATGAAAGTTTTGGGCTGATAGGGACTCATGT[T/A]CAAATAAGATAAGCATGGGTTAAGTTGAATTGTGTGGATTTTGTATATTTGTAAAATAAA			T	A
578	TM578	A1	9855503	1	ATTCCACCCTAGTTTAATTCAAAGGCATGAACCAACCATTCCTGCAACCCACCTCTTCCC[G/A]TCAGGTTTCGATGTCCAAGCATCATGAGGGGGGATTTCACATAAACACAGTTATCAGCGA	Gh_A01G0560	intron	G	A					A01	9853617	9857145	-	AT1G65290	mitochondrial acyl carrier protein 2	O80800	ACPM2_ARATH Acyl carrier protein 2, mitochondrial OS=Arabidopsis thaliana GN=MTACP2 PE=1 SV=1
579	TM579	A1	9858053	0.988	AAATAATCAAATATAGAACATAGGAAGTCATCATCAAATCCTTCTACCTCCATCGACATC[C/A]CTTCTTCGTAAAGATATGGTGTCTTATCCGCAGTAAATTGTTCCAAAGCATTAGCAATTT	Gh_A01G0560	utr	C	A					A01	9853617	9857145	-	AT1G65290	mitochondrial acyl carrier protein 2	O80800	ACPM2_ARATH Acyl carrier protein 2, mitochondrial OS=Arabidopsis thaliana GN=MTACP2 PE=1 SV=1
580	TM580	A1	9867368	1	CACATAGTTTGTGCAATTTCATCTCTCTTAGCAGACCATTCTCTTGCTTTTCTCTTTCTT[A/C]TCGCTCCGTAAGAGTTGGTATTATCAAATCAAACTCAGTCTCCTCGTATAATCCTTGATT			A	C
581	TM581	A1	9871303	1	AATATTTCTACAGTGCCTAAGACCGATATAGCGACTATTTCTCTCCCAGTAAACATGCCA[C/A]CTGAATTACTACCGATGAATAACCCACCTACACTATCAACTACTGATACTAAGCTTTCCC			C	A
582	TM582	A1	9873789	1	TTTGGCACACAAATGTGGGCGTATAGTAACCGCCACTTGAGTCGGTAACAATTTAATTTC[G/A]TGATATTCGGCTATATTAAGGAAACATTTGCGTTAAGGGATAAAAGTGATATGGTGTAAA			G	A
583	TM583	A1	9880908	0.988	ATCGACTCGAGGTCGAAGTATCTTTGAACACTTCTAATCTTATGGCATGCCAACTATATC[C/T]GACTCAGCCTGACTAGTTAATAGGGAATTTATTTCACTTTCTCTGTTTCAATCAATATTC			C	T
585	TM585	A1	9887269	0.965	AAATCTACATTTGGTAACTGAACAGTGAGATTGTAAGTATAAAGTTTCTGCATGGGATTG[G/A]CAACGATTGAAATAATAAGCAACTTGTATGTATAAGAGTAATGATGATATTCCTATGTTT			G	A
586	TM586	A1	9891011	0.976	GGGCAAAATTTTATGCCCATTTTTTAGGTCGGGCTGAGCTAGGCCCGGGCCTAGAAAACA[G/T]GCCTAAAATTTTAGTTGAGCCCGGCCCGACTCGGTCCATACTCACCTTTAATTATAAATT			G	T
587	TM587	A1	9897529	1	TGAAGATATATGCAGTGCCCACATTTTTCTAATGGAGCATGACAAAGCAGAAGGTAAATA[T/C]ATATGCTGTGCCTGCAGCTCTCCCATGTATGAACTGATTAATCACCTTGCTCAAGAGAAT	Gh_A01G0561	exon5	T	C	TAT	TAC	Y	Y	A01	9895244	9897842	+	AT4G27250	NAD(P)-binding Rossmann-fold superfamily protein	P51102	DFRA_ARATH Dihydroflavonol-4-reductase OS=Arabidopsis thaliana GN=DFRA PE=2 SV=2
588	TM588	A1	9899872	0.965	TTCCATTGATTACAGAATTATATCTATCTTTCAAATCCTGGATTTGTCTCTATATATGTC[C/A]ATATCTGGATCTCTTATCCAAAAGGCTGACAAAGGTATCATTAAGTGCATATATTTGAAA	Gh_A01G0562	utr	C	A					A01	9900175	9901880	-	AT5G54630	zinc finger protein-related	0	0
589	TM589	A1	9932709	1	TTTCCATGCACTGGAAAGCCATCTCTTATATGACATATTTTTATTGTGTCTAGTAATCTG[A/G]CCTTTCTATTGCACGTTAAGCACGTAGTTAGGCCTTCACTAGTGAATTTTCTAGCCATAA	Gh_A01G0564	intron	A	G					A01	9930683	9935792	+	AT5G54670	kinesin 3	P46875	ATK3_ARATH Kinesin-3 OS=Arabidopsis thaliana GN=ATK3 PE=2 SV=1
590	TM590	A1	9936529	0.9	TCATGAAAAGCCTTTTGTGGAACGGCTTTGAGAATAGCATCAACAAGTTGACTTGCAACT[G/A]GAATGAGTACTTCAACGCTTAATGTGATTACGAATAAAATGAAAATCAACTACCAAATGC	Gh_A01G0564	utr	G	A					A01	9930683	9935792	+	AT5G54670	kinesin 3	P46875	ATK3_ARATH Kinesin-3 OS=Arabidopsis thaliana GN=ATK3 PE=2 SV=1
591	TM591	A1	9943078	1	TCAAAAAGGGTGAGAAATGTGGCCTTAAATGGCCTATTTTCATCCACACGGGCAGACACA[T/C]GAGCATGTGATAAGGCCACGTGTCCTTTGTAGCTTAAAAATGAGAAACAAAATGTCCAGG			T	C
592	TM592	A1	9950392	0.988	CTTCTATAAGCTTACTTGTGTATGTTATTTGTTTTGTAAATTGACAAATATACATACGGA[G/T]GATCAGATCTACATCGAGGATCACACTATCCAGATTTATTCTGGTAGATTTTGTTAAACA			G	T
593	TM593	A1	9952955	1	GAAAAAGGAAAAGTAGCTTACTGCATTTTCATGGGTGTGAAATGGATCTAGTTACTGTGG[C/T]ATATCGTCGATTACCAAACGAAATGGTGAATCCGGCGGATGCTAAGAACCCTAGCAATTT			C	T
594	TM594	A1	9972774	1	TATCCCTAGAACTAAACCACATATAGTGAACCTTAGGAGCTATCATTGGGTGAAGCTACG[T/C]CGAGCCTTAGTACTTACCCATATATGAGTTATAATTATCGTTTATATGCTTGCATTCTAT			T	C
595	TM595	A1	9977096	1	TTCTATGAAGAAACCGAAGACTTTGTAGAGGGAGATATATGCGCATCAGAAGGAGAATCG[A/G]ATGCGCGAAATCAAATAATTAACTATCCCGTGGTCATCATATTAAGACCCAAAAGTAATG			A	G
596	TM596	A1	9984956	1	CCTGTTCCAGTGGTTCAAAAACGACGTCGTTTGGTAAGAGACCCGACCCGATCCGATTTG[T/C]TGCCCCGATGACCCGTATGTTTTTGCGGTGAGGGTTTATTTTCAGTATTAGTCCTCCTCG			T	C
597	TM597	A1	9988161	1	GAAAGCCCTCGTCAAAACTTTGAGCCCATTGCCATGGCTCCATAGTACCTAACCACTATC[G/A]GAAAGATGTGTTTGTTTGACCCTCCATGTCGCTCTCAAGTTGAGTCATTCTTTGGCGAAA			G	A
598	TM598	A1	9991730	0.899	TATTTTCGATTAGGGTTTTGAGATTTTTTTTATTTCATTGTTTGGCCTTGTGGGATTATT[T/G]TAACCTTATGGGGATTTGATTTTGTTTTCATATGATTGGGTTTCATGGAAACTTTCTTGA	Gh_A01G0566	intron	T	G					A01	9991487	9994331	+	AT5G54680	basic helix-loop-helix (bHLH) DNA-binding superfamily protein	Q9FH37	ILR3_ARATH Transcription factor ILR3 OS=Arabidopsis thaliana GN=ILR3 PE=1 SV=1
599	TM599	A1	9995293	1	AGCCTCTCAACAATCCCAAGCTAGTAGGCAAGCTCAAGAAGCTAAAACAACCCAGGTTTC[A/G]AGTTGAAATTCCACTCATTGATGACTGTCCATCATCTCTAGCTCAACTAGCTCTAGACAT	Gh_A01G0567	exon1	A	G	CAA	CGA	Q	R	A01	9994887	9995972	+	AT3G20680	Domain of unknown function (DUF1995)	0	0
600	TM600	A1	9997700	0.965	ACTGCAAAGAAAACGGAGCTGAGTAAACTAGTAAAGGCCATTTACTACTTGTCACTATAT[C/A]TTCCTTTTCCATCTACTTAAACTAACAAAAGTAGTTCATTTATTACCTCTGGTAAATGTA	Gh_A01G0568	intron	C	A					A01	9996974	9999674	-	AT5G54690	galacturonosyltransferase 12	Q9FH36	GAUTC_ARATH Probable galacturonosyltransferase 12 OS=Arabidopsis thaliana GN=GAUT12 PE=2 SV=1
601	TM601	A1	10035415	0.935	TCAATTTGGTTGAATTACTAGTTTGTGCATGTCATTAGCAACATGGAAGAAGGTTTAGAT[T/A]CAAAATACATACTTCATGTTTTGTCCTTTTATTATTTTCAGATTGCAGATGGAATGACCA	Gh_A01G0570	intron	T	A					A01	10034069	10042484	+	AT3G20720	0	A2RSJ4	UH1BL_MOUSE UHRF1-binding protein 1-like OS=Mus musculus GN=Uhrf1bp1l PE=2 SV=2
602	TM602	A1	10039202	0.996	TTGAATATCAGGTAAGGATTTTTGTCCTCCAATATATCCTCTGGCCGAGCAGCAATGGCA[G/C]TTAACTGTGGGTGTTCCTTTGATATCCCTCCACTCTCTTCAAGTCAAGCCCTCTCCACTC	Gh_A01G0570	exon15	G	C	CAG	CAC	Q	H	A01	10034069	10042484	+	AT3G20720	0	A2RSJ4	UH1BL_MOUSE UHRF1-binding protein 1-like OS=Mus musculus GN=Uhrf1bp1l PE=2 SV=2
603	TM603	A1	10046652	0.935	ATGGTACTTGAATTATGCTCCATAACTAGAACAGAAGATTTCTTTATGCACATAAAAGCT[G/A]CATTCTTTTAGCTCAATGTGCTTATTTAAAAGATGTGACTTCTCTAGCTGCTAAGTGCTA			G	A
604	TM604	A1	10050937	1	TCCGTTCTCGAAAACTAACTATTATCACGGCAAAGGCAAACACACCTTATCGAACAGTAG[C/T]ATAGTTTATGGCAAGACCGGGATGTCGAACCCAAAGGAACTAAAAGTACTAGTATTAACT			C	T
605	TM605	A1	10054203	0.976	AGATGGTGGGTCCTCGTGTTGTGGAGGGATATCATCAGTAATGTCCTTTGGGTCCTCCTC[A/C]TCAACGGACTGGACCAGGCGGTACTGGGGAGGGTCAACTTCACGTTGTCGCTCGATTATC			A	C
606	TM606	A1	10058079	1	TTTTAAGAATTTAAGGAATTTACCAAATTGTTCTTCTATGTGGTCTTTCTTTGTCGCATT[A/G]GGGTATGGCACACGGGGTTTGTACTCTTTACTTACTGGTGTTTGTTCACTGTGGTGTACC			A	G
607	TM607	A1	10063645	0.965	CGTGTACATAAATCCACTAATCCGACATTTTCCTCGTTCTAACTCTGAATTTAGTCTATC[T/C]AGATCTATACGAGTAAATTTAATGTCAATCTATCAAATTTTACACTTATTTAATCTTTAT			T	C
608	TM608	A1	10068762	1	GTTCACACGGGCGTGTGACCTCTGTAACTTTGAAAATTTGTTAAGTTTCTAAGAAATTTT[A/G]TATGTGTTCGGTTTAGTCTAGACCCCTTCCTAATGCTTGTTTAAGGTCTCATAAACTTTC			A	G
609	TM609	A1	10074697	0.996	ACGGGATACGATAAGTAGCCACGACCGTGTGACATGGCCGTAGGCAAAACTGCCAAAATA[G/A]CATGGGCGTGCAGTACGCCTGTGTTTTGAAACTGTGGGTGAACCTGTCAGTTTAACACGG			G	A
610	TM610	A1	10083127	0.996	AACTAACGAATGAGCGTTCGCTTGCTCACGAGTCCTCGAAATGCCAGAATTTCGGTATTT[T/C]GGCTTTTCGGCATTTATCGCTTTAAGCTATAAAAAAGGGTTCGTTACACACCTGTTTGGC			T	C
611	TM611	A1	10093338	0.976	TCCATCCAGCTTTAAACTCTAGCATGCACAAGTATAAAAATAACATTACCATTGCCATTC[T/C]AGGGAATCGAACCCAGGTCTTCCTCTATGCTCCACACGCCACTTTTTTTGGAGCTTAGTG			T	C
612	TM612	A1	10096155	1	TTTTCTCGCTCGTTCTCCATGTAGCGTAAACTACGCCTTATTTCTCTTTGATTTTTGCGA[A/T]TTGTGTGATCGATTTCTTCGTCAAAGAGTAATGGTCCTGACAGGTTTCTTCTAGTCATAA			A	T
613	TM613	A1	10106581	1	TAGAAGAGGATGAGAGGGCCATACAGAGTTGGAGGCAGAAAATACTTGCGACTAGCCGTC[A/G]GAATTACCTCGGAGCCAGGATCTACATCAAGACTGAAGATTTCCATCCAATTTCCTAGAA			A	G
614	TM614	A1	10111557	0.965	TTGGTTGTGGTTTGAAATTTGCAGGGTTGGCTAGTAAAGTGTGAAAGGTTCATTATTGAG[T/C]CCACACGGCCTGGCACACGGGTGTGTGACCAGATCATGTCAGACACCCGGTTTGCACACG			T	C
615	TM615	A1	10117048	1	CAAAACATGCATTAGAGACGGTTCGGGACTAAACCGAGAACTTAAGAAAAACTTAAAAAA[A/G]TTTTATGCTTTATGGCTCCACAAGCCCGTGTGGGTATAAACCGTGTGATCACACACGGTC			A	G
616	TM616	A1	10134891	1	AAATGCATCCAATGGAGATCTATTGTTTAGATGGGGACCATTTGGCCTGCGAGAACTGGC[C/T]CGATTTGGTAAACTGTTGGAAAAGCCTGTCAGATTGAAACATGGTTAGCCCAATGATGAA			C	T
617	TM617	A1	10142702	1	CAACTACAATTTTGACGCCAATCTATGGGCAGGTACTAAATTGGCGTACTCAAGGAACTC[T/A]GATGCATGCTTTGCATCTAGATTTATATTTAACATGTCGCCCTTAGGTTCATTTCGTAAA			T	A
618	TM618	A1	10149022	0.935	ATACCAGACATTTTGCTAGTCAAAGTAAGGCTTTTATCACCTAAACATTACCTAACTCCA[C/T]TAATTACATTCAAACTTGAAAGACTAAACTTGCACACTTAGTAAAGCTGATTTACCAGTT			C	T
619	TM619	A1	10154092	1	GAATGGCTGACATGATTGTAATAATGTTTACCCTTTTAGCTATATTCAGGTTTACAGCGG[T/C]TTTCACCATTCCGGAAGGGTTTAAAATGATGAACCAAACGCGAGCATGGCGGTTTTGATT			T	C
620	TM620	A1	10167410	1	GAGAGGGGGAATTTACCAAAAAAAAATATTCAAGAGCACTTGGACAGAGGTGTGGCCAAC[G/T]AGAATTGGATGTCTATGTTCCTTGAAGCCACCATTCAACATTTGGTGCATTCGAACTTTG			G	T
621	TM621	A1	10179514	0.965	ATACTTATCTATTTCACATCAATTCTCTTACCAAATCACTCCAAGCTTATAATTGCTTAC[A/G]GTATGAGTACATCGATTTTTCATATGCCATTGTCCAACTATGGTCTTACACATACATTCC			A	G
622	TM622	A1	10188236	1	TAATCAACCGATCAATCTACCACTTTAGCTTTTCGTTGATCTAACCCGAACGTGGCTTTT[C/T]TTAATCTAAATCATCAAATTAAACTAATTCAATGCGTATTCTAATCAATTCAACCCAATT			C	T
623	TM623	A1	10195406	1	AGGGTTTCTAGGCATTCAAAAGCCTATAAATACACACTAGAGGAGGAGAAAAGGGGAGAC[A/G]GAGAAGAGGGGTAAGGAATTACTCTAAGGAAACCGATTGATCCATCTCAGAAGCCAGATT			A	G
624	TM624	A1	10210006	1	TTTCGTGTGTTCTCGATTTATGTGTCCGCCATTCAACTAGCTCTTCGATTTGTAGCCTTC[A/G]TTCTTCGTGAATAGCTCCTCTACTATTGCTTGAAAATGGCTCATGTACTTCCTTCAAACT			A	G
625	TM625	A1	10212236	1	TCTCTGCAGTTGTGGCTTGAATATCGTCCTCTTGCTCTTCTTCTGTGTATCTTAAGCTTC[A/G]CTTTATTTCTCTTTGGTTTCTGCGAACTGTGCGATCGATCTCACTATTAAAATGTAATGG			A	G
626	TM626	A1	10214660	0.965	TGTGGGAGGAGGCACACGACCGTGTGGATGGGGCACACACCTGTATGAGCCAGGGACATG[G/A]CCATGTGAACAAGTCAGGTAACTCTCTATCTATTTGGGGTAAAATAGAATATAGGCCAGA			G	A
627	TM627	A1	10396928	1	ATTATTGTTGATGTAATTTAAGTGAAAGGGAGGGAAGATGTAGGGGGAAAGGAGAGAGGC[G/A]AGATGGAGGGAGGAAGAAAGTTCACATTGTTGAGTGTCGAGAGCCTAGTTGGATTTCTAA			G	A
628	TM628	A1	10612825	0.996	CCTGAATCTTCGGGCAATGGAGCAAGGCCGTGTACTCTTCTATAGTAGGTACCAAATCTA[T/C]CTTCCCGAAAGTGAAACAACTATAAGCAGAATTTCAATATTAGGCTAGGGCTCGAAATAG			T	C
629	TM629	A1	10729273	0.988	AACCCCAATACTTGTTCAACCATTTTGGCTCTCTCAATTAAATCTACAAATTCAGTAATC[C/T]GTAGAGACACCAACTGTAATCGTAATTCATCATGCAGTCCTCATAAAAACCTTTTGCATC			C	T
630	TM630	A1	10836417	0.988	CAAAAAACAATAGCAAACAACAAAGAAAAACAATGAAGAAACAGACAAAGAATAGAAACA[C/A]AACGAGTGTGTATTCGGCTATAAAGGCCATATTCGATCCCTTTGTAATTTTTTACGTACA			C	A
631	TM631	A1	10839888	1	AATCAAAGCCATGCATGTTGGCAAGCACAAGTGTATTCTGCAGTGTCAATTTGAAAGGTT[T/A]TTTTGTTTCTGTGATTCCAAACCTTTACATTGCTGTCGAGTTCGCATTTGGTCAGTTTAT			T	A
632	TM632	A1	10845639	0.965	CCATATTCTTGTTGATTCCTCTCATGCTAGAGTGATTAATGATATGATTTTCAGATGCTC[T/C]AATGACAACTCAGATACTGGTTTTGAGAATAGTCCGATTTTGGGAATTCTATGATTAAGT			T	C
633	TM633	A1	10865718	0.976	TCCTTGGTTCAGCTTCCGGCGAGAGTTGTGGTTGCTCCGGTGGGGATTGTGGTTCCTTTG[G/A]CAGGGGATCTGGTTGTGGGTGTTGGGAGGATGACCCAGCTTGATAAATTAATAAGTGCAG			G	A
634	TM634	A1	10869475	0.949	GAAAATTAACCTCAATCGGTGCTTGGCTTCCCACCATTCATACGGTGGGAAAGGATGTTC[C/T]CTTTATCAGGCAAAGAGCTGAGAAATTTCTGAAACCACAACATAAAATAGAGTTAGTATG			C	T
635	TM635	A1	10873746	1	TTAGGTACCGGTTTAACGGAGTCCAGTTCCCGTGTCATAAGGGAACTGATTGTTCCCTTA[G/C]TCCCCACCTTAATTGATCCTCCACCGCCCTTGATAGCTTCTAGTTTTTGCACCATGTTTC	Gh_A01G0603	exon1	G	C	ACT	AGT	T	S	A01	10873301	10873801	-	AT5G54850	0	0	0
636	TM636	A1	10879525	1	GGCCTGAAGAGAAGATAAATGGGAAAGACCTAAGAGCAAGGGCATTTGAGGCTGATGGCA[C/T]GATAGATGTAAATCAAAGAGAGCAATCTGGAAATCGTTTGGGTTGCTCAAAGGTGGATGG	Gh_A01G0604	exon4	C	T	ACG	ATG	T	M	A01	10877127	10881131	+	AT4G27060	ARM repeat superfamily protein	Q9T041	MAPT_ARATH Microtubule-associated protein TORTIFOLIA1 OS=Arabidopsis thaliana GN=TOR1 PE=1 SV=2
637	TM637	A1	10882369	0.965	AGACTAGTGAAATCATAAGAGTATTGGGTTAAGAGTTCCAGAAAGAAGAATCAGGCAACA[T/A]AGTCAAAATTTTGTTTCTTAAAGAATTAAAGTTTATATAGCCTTTAGACCACTACAAATA	Gh_A01G0605	intron	T	A					A01	10881937	10888814	-	AT3G20540	polymerase gamma 1	Q9HT80	DPO1_PSEAE DNA polymerase I OS=Pseudomonas aeruginosa (strain ATCC 15692 / PAO1 / 1C / PRS 101 / LMG 12228) GN=polA PE=3 SV=1
638	TM638	A1	10885121	1	ATATGCAGATGTATCAACTGCAATCATTGTTTCAGGATAATCATCAATATCACCATCACC[G/A]GTGTCCTCTGTGAAATCATATTCAGCGGAAACCTTCCCAGCTAAACTCTTCAAAGCAACA	Gh_A01G0605	exon5	G	A	ACC	ACT	T	T	A01	10881937	10888814	-	AT3G20540	polymerase gamma 1	Q9HT80	DPO1_PSEAE DNA polymerase I OS=Pseudomonas aeruginosa (strain ATCC 15692 / PAO1 / 1C / PRS 101 / LMG 12228) GN=polA PE=3 SV=1
639	TM639	A1	10907396	1	AGCTCTCCATGGTTGTATAACTTAATTCAATTGTCAACAGAAGTTGGACAAGTTGTAAAG[C/A]TCCCAACACCTTATGAGGTTTCAGATGTGTATTTGGAGTCAGAGTATCAACGAGTTTGTG			C	A
640	TM640	A1	10909587	0.965	AGGGGAAGAAATTCCGGTTGAATGAAAGGAAATTTCGATAGATCTCTGAGAAGGAATTGA[T/C]GGTAAAAAGGATCTAGCCCGGACGGGTGATCCTACCCTGATATAGCCCTCCCGAAGAATA			T	C
641	TM641	A1	10915831	1	GTCACACGGGCGTGTCCCTGTTAGGCCCAAGCCTAGTTCTATTTGGAAAAAGCCACTTTT[G/A]AGGGTTTAGAAGCATTCTAAAGCCTATATAAACACCCAAGGGGGCACCTAGAGAAAACAC			G	A
642	TM642	A1	10927156	0.988	TAATTGAAATCTCTTTATAATTAACGCCCTAGGGTTGTATTAACTCGATCTATGGATCTC[C/T]TTATTAAGTTTCACCCTAATCCGAAAAAATCTTGTCACCCTATCTCTGGCGCGCAATCAA			C	T
643	TM643	A1	10931703	0.988	CCTATCTCAAGGCGCGCAATCAACTCCACTTAATTATGACAAATATACTTTAGAAAGGGT[C/A]TATTCCTCCTCTAAATAAGAGCTTAACTTGAATCAATATCCTGGAATATCAAAGTAAAAA			C	A
644	TM644	A1	10936358	1	GAAATTAATACAGTTAGTGCTCGGGTTGCTTCCCGAAAAGCACTTATTATAGTCTAAGCT[C/T]GACTTACCTCTCCGTTGAATGATCATGGTGGTTCGAACAGTTTATACTCCTCATTCCTGC			C	T
646	TM646	A1	10949548	1	TTGGCCTGTAAGTGCATACTCGGGTGCACAATAGCCATAGGTTCCCATAACCCTGGTGGA[G/A]ACATGCGACTTATCTCCAGTTGGACCAATCTTTGCAAGCCCAAAATCCGAGAGCTTTGGA	Gh_A01G0607	exon4	G	A	GTC	GTT	V	V	A01	10949030	10950941	-	AT3G20530	Protein kinase superfamily protein	Q9FE20	PBS1_ARATH Serine/threonine-protein kinase PBS1 OS=Arabidopsis thaliana GN=PBS1 PE=1 SV=1
647	TM647	A1	10953729	1	CAAGAGGTTATATGTAACAGCCCGATTTCAGTAGTGTCGAAAACTGTGGTTTCGGGACCA[T/C]AATTCCGATGAGTGAATAAATATTTTAATGTTTATTTAATATTTATAGAGTTACACTAGT			T	C
648	TM648	A1	10956392	1	ATGGTTGATTTTGATTTGGCGTGGAACCTAAGTGTTGGATGAAAGTTTGGAAGCTTTTTC[A/T]GGTGCACACGGCTTGGGCTATTCCACACGACCATATGTCTTATAAAATTTTAGGTGTAAG			A	T
649	TM649	A1	10963656	1	AGTCAGTTATTTTGGTCTTGTATTCATTCGGGACCCGAACCTGGAGATCGGGTCGGGCCT[A/G]GGGTGTTACAAGCTCCCTCTTCATTTGTCTCACCAAAAAAACTGTTGTTATCTATAAAGA			A	G
650	TM650	A1	10969919	1	ACCTGCAATTTACGGTAATGCTTGTCCAAATGAACAATCATGGCTACATCTCGAAGCACG[T/A]ATATGCAAACTGGAGACACTGCTTGGTAAAATGAAAGCAGCTAGGGAGGTTAAGTCATTA	Gh_A01G0608	exon2	T	A	CGT	CGA	R	R	A01	10968759	10970009	+	AT1G32120	0	0	0
651	TM651	A1	11123833	1	CGAATCAATACGTAATTAATATAGGTTCAAAAGAATAGGTATCTAACCTCGACTTCTGAG[C/T]GTTGATCTAACAACAGTTTAATATCTTCTGGATCCTCAGGCAGTCCCACGTAGCTCGATC			C	T
652	TM652	A1	11179131	1	ATTTTAGACCCATAGATGTGATGGGCTTATACTACCTCAAGGCCCAACAACAAGGTCAAA[G/T]GCCAAGCAAATCAAACCAAAATTCAATTAAAGGCAATATATAAGGATGAATCTTTTCGAG			G	T
653	TM653	A1	11339222	0.935	TTATTGTAAATAAAAGTGTTGGAAACTAAATTAAGTGTAAATAAATAAAGCAATCATTGT[A/G]TCGTTGAAGAATCACTATCTTAGAAGTGATTTCGTTTTGATCGGTGTAATTGGAAATGGA	Gh_A01G0632	utr	A	G					A01	11338400	11338657	+	0	0	0	0
654	TM654	A1	11347397	0.965	ACCAATATGAGGTGAAGTAACACTAGGTACAATAAAACATCTCTGAGAGAGTTCAAAAGA[C/G]ATATAAATAGACTTTTAATTGCTCAAAAGATGTTTAGCATGCCTTGCTCCATCGGAGAGG			C	G
656	TM656	A1	11454784	1	AGTTAGGCGTAAGTGTGGTTTTTCTAATGGAATTGATGTGGATTCGAATGGTAGTAGCGG[T/A]GGCTTATCTTTGGAGTGGAATAGTGATTGTAAGATTACTTTTCGGTCTTTTTCAAGAAGA			T	A
657	TM657	A1	11523922	1	TATTTTATATTTCTATGTAATTCGACCCTCGTTCAAGCCTCGATAAGTGTGTTAGGGACT[T/C]GATTTAGTTTGGTTCGTGTATATATGTGCATTTATGGGCTTTAATTTTATTGCTCGTTTA			T	C
658	TM658	A1	11535243	1	ATAAAAACCAAAGGATGGGTGTTGTTATCAATGATGAAGGGTATAAAGAGAAATAGAAAG[A/G]CATCAAATTCTATAAGATCTGAGGATGTAACACCCCAAACTCGGCCTAAACATTATGGCC			A	G
659	TM659	A1	11540311	1	ATTCTTTTTCTTCAACTTACCTACAATGGTATTGATGAGCACTTACAATGCGTTCATATT[G/A]GAACTAAAGGCCTCCACCATATATTCCTTAAGCTACTCTTTCGTCGCGTTCAACTCATCA			G	A
660	TM660	A1	11545274	0.965	GAATTTCATAAAATTTCTATAAGATCCAAGCTAAGATTAAGGAATTCAGGTTAGTTACCT[G/C]AAAAAGATAAAGAGGAACCTACCTTGAAAGATGATGCTATGCAGTTACAAGCTTCAAGTG	Gh_A01G0640	intron	G	C					A01	11544983	11558549	-	AT1G50730	0	A4VCH4	CP062_DANRE UPF0505 protein C16orf62 homolog OS=Danio rerio GN=zgc:163107 PE=2 SV=1
661	TM661	A1	11547426	0.949	CCAGTGTTATGGGTAACATTGGCACTACAAACAGCCTGCAGGTGGAGCTATGAGGTGCTA[T/C]AATTAATTTGTTGAAATTGATGCTTCTGTGGCAGTGCAGCCTCTTAATTATGGTGACAGA	Gh_A01G0640	intron	T	C					A01	11544983	11558549	-	AT1G50730	0	A4VCH4	CP062_DANRE UPF0505 protein C16orf62 homolog OS=Danio rerio GN=zgc:163107 PE=2 SV=1
662	TM662	A1	11557130	1	ATTGTATGAGCTTAGCCAACCATGCAGACATTCGGTCCTTTCTAGACCTGTATTTTATTA[C/G]CTATTAGATGGAGCTAAAAAGTTAAAATTAGGGAATTTTTCACCTTTATAGATAACTTCA	Gh_A01G0640	intron	C	G					A01	11544983	11558549	-	AT1G50730	0	A4VCH4	CP062_DANRE UPF0505 protein C16orf62 homolog OS=Danio rerio GN=zgc:163107 PE=2 SV=1
663	TM663	A1	11564204	0.988	TGAGTACTCCAAGGATCATACCTAAATGAGGCAAGCACTAAGTTAACTCTAATCTAAGGG[A/C]AAATAGATCTAATTAGTATTTTAGATAAATTATATTATGATAAAGTATAAAGAAAGGTTT			A	C
664	TM664	A1	11576904	0.949	CCTTAACCTGGAGCGGGTCGGGTCAGTCCATTTTGCATCAAAACAACGTCGTTTAGCGTC[T/C]GGGATCATTAAATCAAAACGACGCCATTTTGATAAGTTATAAAAATCTTTTTACCAAAAA			T	C
665	TM665	A1	11584486	1	AGGATGGCGTGTAAATATCTTAGTGATGGGGCGAGAGCTGATGCCTTGGAGCGGCTAGGG[T/A]CATAAGTGGCTGAAGTAGCGAGTAAGGCCTTCCAGCAATTTGAATGAAAATAGTGGATGT			T	A
666	TM666	A1	11587484	1	GCTGCTCATTTGGGTTAGTTTTAGTACCTTGTGGTCAGTCAGAAATCAATTTAGCCAGCT[A/G]TCCAATTTGATTCTCGAGCCCTTGGATCGATGCTTGCTAAGTTTTAAGTGCAGTTTTAGT			A	G
667	TM667	A1	11589782	1	CATATGTGTAAAAGAAAACATATTAGAAGAATAATAATAACAAAACATAAAGAAACCTAA[C/A]AACCCTGAAGGAAATTGAAGGGAGATCTTCAATCTTGAAGGAGAATCCAGCTTCTGATAT			C	A
668	TM668	A1	11593100	1	CAGTTCTATTGAGCTTTTGTTTAACCCTTATAGGTTTCCGTTCAGCTCTATTGAGCTTCT[G/T]TTGAACCCTTATGGGTTTTTGTTCAACTCTTACGAGCTTCTGTTCAACCCTTATTGGTTT			G	T
669	TM669	A1	11596825	1	GTGTAAACATGGCTTAAAAATGGTGAAAAATCAATGTACCACATGGCCTAGCCACATGGG[T/C]GTGTGCCCAGGCCTTGTGCCCTTTTGATACTTAAGAAATTGCAAGTCAAGATTCCACACG			T	C
670	TM670	A1	11610974	1	CTTTTCTTATACGGCCACAAGGCACGCCCGTGTCCCCTGACCGTGTGGCACCAAGCAGGC[T/C]TGGTTTAAGCCAAATTTGCCACCCCTTTTTGGGTCCAATCCTACAAGCAATAATATACAA			T	C
671	TM671	A1	11616053	1	ACTCAACATATGATTTGTTTTCCATACACAGGTTAAGTGTTAAAGTTAATTGCCAATTCA[G/A]CATCCATACGAGATCCCGAACTCAAACGTGGTGAAGTATATTTCTTTTTGGTCATGGCAT			G	A
672	TM672	A1	11647052	0.988	GTCATTTATGGTATGTTACATTGTATCGAGGTGGGTTGATGATGTTTTGAGGAAGTATCT[T/A]AAAGGCTCTTAAGCTTGTTATCTGGCAGCTCAACTGCAATCTTCTAATTATGTGTCGCAT			T	A
673	TM673	A1	11649849	1	TTGCAGGTTGGTGGATCAATGGTGTTGTTCCCATGCAGTATCTGAACTGGGGAAACACGT[A/T]TCATGGCGGTTTCATCTTCCAGCCTTGCGTAAGGCTTAACAATTCTCTTAACTTGAGGTT	Gh_A01G0644	exon3	A	T	ATA	AAA	I	K	A01	11648876	11650432	-	AT2G41640	Glycosyltransferase family 61 protein	Q08CY9	EOGT_XENTR EGF domain-specific O-linked N-acetylglucosamine transferase OS=Xenopus tropicalis GN=eogt PE=2 SV=1
674	TM674	A1	11655739	0.965	CAACGATCTCGATCATCGAACTTAGTGAATCTAACTAACCTATGAGCGTGTGCATGCTCA[C/T]GAGTCCTCAAAATGCTAGAATTTTGACATTTCGGCTTTTCGACAAATATCGAGTTAAGCT			C	T
675	TM675	A1	11663649	0.949	AGCACACGGGCGTGTCATGTGGCTATCTGGACAAGTCAGTATATATGCCTTGTTTTGACA[C/T]GGCCTAGACACACGAGCATATCTAAAGTCGTGTGAGGCACACAGCCTGTACACACGAGCG			C	T
676	TM676	A1	11670991	0.965	TAGGGAAACAATGGATCTCACTGCCTTAGTCCTTTAGCTCATAAAATATAACACACTAAC[T/C]CACTATTTAAAGGAATTGAAAACTTAGAGTGAGTAATACATGCCATAATCCAACTCCTAA			T	C
677	TM677	A1	11697101	0.996	TATCATACAATAATAGTCACTGACTGAAAACTCACTGACTTAAGACTCAAATAAGCTTCA[A/G]GCCGTCTACCCATGACCTGGTTAAACCCTACCAGATTGATACACACAAGAAATACAGCAA			A	G
678	TM678	A1	11743258	0.988	TTTTTCCTAATATGCTTGCTTTAGTGGTAATCTTTTGATGTATCTTTGCATATTACATCT[C/T]ATAAGTTGGTCGATTTTACCCTTTTAAGTGGGAGTGAGGAACTATTCCTTCATGAGGTCT			C	T
679	TM679	A1	11754178	0.965	GAGTAGATAGAAACCACTAGTCTTATCTCCCTGAAATTGCAAAGGAGCAGATTGAAAATA[G/A]CAAATCTTATCTCTCTGAAGTTGCAGTAGAGTAGATTAAAACTATAAACAACAAACCCTA			G	A
681	TM681	A1	11809435	1	CAAACCTCACTAAGTGTGAGTTTAGGCAAATCCCTATCATTTAAAACACCAATAAAAGAG[C/T]AGCCTTTGTGGAAAAACTCTGGAAGGATAAGCCTTCGTGGCAAACCTCTTAAAGAATGTA			C	T
682	TM682	A1	11818627	1	GTCGCTAGCTTGACGACTCAACTAGTATTAGGCTGTTCCAGCTGAATTCTTTCGTTCGTA[T/C]GGGTTTGGAAATTCTCCTTTTTTATCACATCCACCATATTTGGGTTTAATCGTCCTTGCG			T	C
683	TM683	A1	11865504	0.988	CAGGTGCAATCAACTAGCTGAGGTAGAGCTCTTTTTTTGTTGAGGGTTACAAACTTTCAA[C/A]AAGTTTAGTATTATTTTCGATTGGGGTTTATCTTTCTACTTTACAGGAAGTCTCGTTGAT	Gh_A01G0652	utr	C	A					A01	11861148	11864869	+	AT3G20290	EPS15 homology domain 1	Q5E9R3	EHD1_BOVIN EH domain-containing protein 1 OS=Bos taurus GN=EHD1 PE=2 SV=1
684	TM684	A1	11872624	1	TTACAGGCAGGATACATGCTCTACGATCGAGTTATTCGACCAGCAGAGGTCAGTGTTACT[T/C]AAGCACTGGATCCTGATGCAGACAAGAATAACACAAGTAACAAAGACTCTGATGCTTGAT	Gh_A01G0654	exon6	T	C	TAA	CAA	*	Q	A01	11870303	11872626	+	AT4G26780	Co-chaperone GrpE family protein	Q3SW78	GRPE_NITWN Protein GrpE OS=Nitrobacter winogradskyi (strain Nb-255 / ATCC 25391) GN=grpE PE=3 SV=1
685	TM685	A1	11876462	0.899	CTTGAGAGAGACAGGGAGAGGCTTTTAATAGGTGGCAAGACTTGCAATATTAGTATGCAT[T/A]TGCCTCTACCAGCAATGATACAAATGGTTATTAATTTGATTTGTTTCTGCAGTTACGATG	Gh_A01G0656	intron	T	A					A01	11875192	11878694	+	AT5G55220	trigger factor type chaperone family protein	Q8S9L5	TIG_ARATH Trigger factor-like protein TIG OS=Arabidopsis thaliana GN=TIG PE=2 SV=1
686	TM686	A1	11879865	0.988	AAAAGCTCTCTTGAAACCACTTGCGAAAAAGCCACCAAATGGTGCAATAATTGATGCAAA[G/T]AGGCCCAGCCATAAAGCATGCCACTGAACTGGCAGAATTGCTATCTCTGTCCATGGCAAC	Gh_A01G0657	exon8	G	T	CTC	CTA	L	L	A01	11879085	11882467	-	AT4G26770	Phosphatidate cytidylyltransferase family protein	O04940	CDS1_SOLTU Phosphatidate cytidylyltransferase OS=Solanum tuberosum GN=CDS1 PE=2 SV=1
687	TM687	A1	11899058	0.965	TTGTGATATTTAGCATTTGGAAGGTGGTTTTTGATTCATGATGTTACCTTTGCATTAGTC[A/G]GATCTGTTATTACATTTTCTACTATGAAAGAGGTGAAATGGCAACAAGGTACAAGTTTCT	Gh_A01G0658	utr	A	G					A01	11895421	11898851	+	AT5G55230	microtubule-associated proteins 65-1	Q8LEG3	MA652_ARATH 65-kDa microtubule-associated protein 2 OS=Arabidopsis thaliana GN=MAP65-2 PE=1 SV=1
689	TM689	A1	11952842	1	CATGTATAATTTGAACTGTCCAAGATAGTTGAAGTAACCCCTTGATAGCTCGTAGTATTG[C/T]TGAATGATGGTGCTTAGTTGAAATGGTTTGAATCAATTAGATGTTTGCAACACTATCCAT			C	T
690	TM690	A1	11978707	0.996	TTTTTTTATGTGATTCTGAACACTTTACCTCCCTCACCTCCTCTGATTCCTCAGTATGCC[T/C]CAGTAGCTCTGCAAGGCGCGGACATGTTTAGAAGAGAGAAACCTCTGGTAGACAAGATCC			T	C
691	TM691	A1	12001551	0.935	AAAACAGTCCTTGACCCAAACTTTAGAAAAATTACATTTTTGCCCCTAAACTTTTACATA[T/G]TTACACTTTTTCCCCAAGGCTCGGAATTTAAACTTCATCCTATTTTCTTATGTTTTATGA			T	G
693	TM693	A1	12022546	0.996	TTTTCACACGGCCTGGCACACGGGCGTGTCTTGTGGCCGTATGGTGAAGTCAGTATGTAT[T/G]CCTTGTTTTGCCACAGCCTAAACACACGTGCGTGTTTAATGCCATGTGAGGCACACGACT			T	G
694	TM694	A1	12037935	0.765	TATAGAAATTTCATATCAACTTATTTTAAGAAATAGGACAAAGCATTGTTTTTGCAATGA[C/T]ACAAAAATAAAATCAAAGCATTGTTTTTGCAATGAAACAAAAATAAAATCATACTCCCTT	Gh_A01G0665	intron	C	T					A01	12034533	12041403	-	AT5G55390	ENHANCED DOWNY MILDEW 2	Q55FD6	Y8158_DICDI PHD finger-containing protein DDB_G0268158 OS=Dictyostelium discoideum GN=DDB_G0268158 PE=4 SV=1
695	TM695	A1	12042892	1	ACTATAAGATAAGAGGACCTCTCTTATAAATACACTCCTAGCAATAGAAAAATGATTGAC[A/C]TTTTGAGCCTTAAGCTTACTATAGGCAAGTCTTGACCTCTTTAGGTGAACCAATCTTCTT			A	C
696	TM696	A1	12045131	1	TAATTGTACGAGTTTATGACCTCTTCTGCCTAACTGCAACCATATTCACCCTGTCATGTG[T/A]TCATGCGTGGGATTCCGCTGTTGCAATTTCAGTATCTTCATTCTCACATTGAGATTACGA	Gh_A01G0666	utr	T	A					A01	12045186	12049813	-	AT4G26700	fimbrin 1	Q7G188	FIMB1_ARATH Fimbrin-1 OS=Arabidopsis thaliana GN=FIM1 PE=1 SV=2
697	TM697	A1	12049279	0.965	AACCTATGGTTCCCACTTCTATGCAACTTGACAGAATGTAAACTGCCATATAAGTTAAAC[A/T]GAACCAACGATTACTTTTCTTGATGCTTTTATTAACAGAAAAATAGAAAACAAGTATGCA	Gh_A01G0666	intron	A	T					A01	12045186	12049813	-	AT4G26700	fimbrin 1	Q7G188	FIMB1_ARATH Fimbrin-1 OS=Arabidopsis thaliana GN=FIM1 PE=1 SV=2
698	TM698	A1	12055376	0.988	GTCTAGTTTAGTGTTTCATAAAACGATCATCAATGATAAAAAATCACAGGCAAAAGGTAT[C/T]GAAAACAGTGGTTTCATAACCCCATTCTCCGATGATCGAGTCTATAAATATTAACATTTA			C	T
699	TM699	A1	12057610	0.965	GTGTGTACTGTAAGTTATGCGAGTTGTGTATCTGCAAATTGTATCAAGTGGTGTAAAAAA[T/A]TTTGTTTGATATCGATGATAATTTCCTGTAACTTGGGCTGATGATCGGACCGGGCTATGG			T	A
700	TM700	A1	12065006	1	TGATTAGAAAAGTTCAGTTACATACCAGAGTAGTAAAGAGAACAACGATTATAGTGTTTG[C/T]TATCATTGCTGCATTGACCGGATCCCATGTCACACCAGAAAATGTGAACTGTATTAACGA	Gh_A01G0668	exon13	C	T	GCA	ACA	A	T	A01	12064497	12067582	-	AT5G55470	Na+/H+ (sodium hydrogen) exchanger 3	Q8S397	NHX4_ARATH Sodium/hydrogen exchanger 4 OS=Arabidopsis thaliana GN=NHX4 PE=2 SV=2
701	TM701	A1	12067235	1	GAAGAACAACTCTTCACTGAACCTAAGGATGTGAGAGCTTTTTCCTTTGTTCAAGAACAA[T/G]ATTACTGTTCCTGCTATGCCTCCCTGAGACCAACAATATGGCAGTTAGACTTTAAATTCC	Gh_A01G0668	exon2	T	G	ATA	ATC	I	I	A01	12064497	12067582	-	AT5G55470	Na+/H+ (sodium hydrogen) exchanger 3	Q8S397	NHX4_ARATH Sodium/hydrogen exchanger 4 OS=Arabidopsis thaliana GN=NHX4 PE=2 SV=2
702	TM702	A1	12077048	1	CATGAGAAGCTTCGTACTTTCTGTAACTAGAAATGCAAAAGTTACTGTTGACTATATCTC[G/T]TCACCGGAGGTAGCTTTCTTGCGAAACATTGCTCCAATTTTCCGAAGAAGTTCAACAAAG	Gh_A01G0669	exon4	G	T	TCG	TCT	S	S	A01	12074985	12081662	+	AT5G55480	SHV3-like 1	Q9FJ62	GLPQ1_ARATH Probable glycerophosphoryl diester phosphodiesterase 1 OS=Arabidopsis thaliana GN=GPDL1 PE=1 SV=1
704	TM704	A1	12090164	1	TGAGACACACGCCCGTGTAGACAAAAATAGGCTATTTACCAAGCCATCTTACCACCCAAA[C/T]TTTCACAACCTAAATCAACCCAATTGGCACAAAAAAATAGCATAATTAGGCATTCAACCA			C	T
705	TM705	A1	12103808	0.996	TAGGACGTGTAGCACACACAGCTGAGACACATGCCCGTGTGTTAAATTCTGAGCATTCTG[T/C]TTCTCAAAATTTAGGTGCAGGGGACACACGGCCTAACTACATGCCCATGTTACCGTGTGT			T	C
706	TM706	A1	12109574	0.949	ACCCACACGGCCGTGTGCAATTTAACGGATCGAACACGGCCTGGCAATCATGTCACACGA[T/C]CGTGTCACATGGGCGTGTCCCTATTGAGCCCAAGTTAAGTCCAATTCGGAAAAGGCCACT			T	C
707	TM707	A1	12115530	0.965	ATCTCATCATCCCATTGGTTCCATATCTCTTTCAACTCTTGAAGATTATTCTAAGTCACA[T/C]TGATGCGAATGAAATCTCACAATTCTGAGACATACTCTTTTGTCAGACTATCACATTTCT			T	C
708	TM708	A1	12125352	0.965	GATTCTTCTCCTTCTATTTGAATTTTTTTTCTCTCAAGAATATGGACTCTGTTTTTTATC[C/A]TTATATCCTCTGTTTTTCTGTTAACAGGATTTGAGACAGTGACCTACATGTTACAGGTAC	Gh_A01G0670	intron	C	A					A01	12124872	12126508	+	AT1G50590	RmlC-like cupins superfamily protein	Q9LPS9	PIRL1_ARATH Pirin-like protein At1g50590 OS=Arabidopsis thaliana GN=At1g50590 PE=2 SV=1
709	TM709	A1	12164325	0.935	ATAGGATTGTTGTCTTTGAAAGGCATTCATTTCTTCATCGTTCTAGAGGTATTTATAGGT[A/G]AGGGTCTCATGTGAGGTGATATTAAAAATGTTAGACTTGCTATCTAACAATTGTTAAGGA			A	G
710	TM710	A1	12171876	0.965	CTAAGAAGTTTCTAAAAAAGGCAAACTTCGTTTTCCCTCCTGCTCAATTGAAAAAAAGTG[T/C]AATGCCCTGAATAATTTATTTCTGTTTCTATAAATATCTTACACAAATATCTATTTGCTT			T	C
711	TM711	A1	12175885	1	TATAGCCTATTGAAAACATTAGGTTATCTGGTCAAAAAGCCTAGGGATGGATGCGTCACG[C/T]GATTTGTTGATGCTCTGTGATAACTGGTGGAATTGGAGTAATTTGACAAGTAACGGTTGT			C	T
712	TM712	A1	12491945	0.996	AAAGAACACTCAATAGACTCTTCATTCGTCTCGACATAAGAGGCCTTGCTAGTGACTGCG[A/G]TTATAATGTCCTCCTCCGCATTAATGGTTACTAACCGTCCATCCGTCACTAACTTTAATT			A	G
713	TM713	A1	12566894	0.988	CTCAATAGAGCTTAATATTCAGCTCAAAAGAGCTTAATGTTCGGCTCAAAAGAGCTTACC[G/A]ACCATGACTTGAAAAAGCATGTATGATGATGAATTGACGGATTAATGACATAGTTCACTC			G	A
714	TM714	A1	13028548	0.996	GCTACGTAGATGCTCGCAAGCGTGAGTTTCTGAACCTCACACAAGGTGACCGATTTGTGG[A/C]TGAGTATGAAGCCGAATTTCTGAGGCTGAGCTGTTATGCTCGAGGTATGGTGGCATCAAA			A	C
715	TM715	A1	13148372	0.988	AAGGGGGTGAGCTACTCAAGCTTAGTGTGAGTTCTAATCGAGACTAAAAACAGAATTACG[A/G]AATTCAATTCAATAGCGCAACAAATTTACAAATATTCACTGAGTTAGAAGGTAAACTTGG			A	G
716	TM716	A1	13172006	1	CTAAATCGAGCCCTCGGGGCCCTAAAAACAACCTAGAAACAATTTGGGACCAATTTGAAA[A/C]AATTTGGGAAGTTTAGGAATAAGATGCAAAATTTAAAAAACAAGGGTCACACGGCCATGT			A	C
717	TM717	A1	13355716	0.976	AGATTAGGTTTTGGGGGGTTAAATGGGACACGGTCGTGTGAGGCCCGTGTTGGGCCACAC[A/G]GCCATATCACACGCCTGTGTAGCTCATGGTTTACCCGTGTTTGTCGCAAAAATTAAATGC			A	G
718	TM718	A1	13398575	1	CCGACGCGTCTTAGCAGTTGTGCACTTGGATATTCTTTTGAATTCCTGGCCATCCACTCT[T/A]CAAAATATCACATTCAATTTCTTTGAATTAGCATTCGCCAGCTTCTCCTCTGTGTTCAAT			T	A
719	TM719	A1	13415723	0.988	GTTAATTATTGTAGAAAAATTTTCCTTTCGTTTGCTCATGGAGTTGACCAGGGTTTCTTC[T/A]TGTTTACATTATGGCTTAATAATTAATAACAATCTATTACTAGCTTAGGATGATGATTTG	Gh_A01G0704	intron	T	A					A01	13415163	13417373	+	AT5G55610	0	0	0
721	TM721	A1	13556598	0.988	TATTATGGAGATAGATAATAATCCTGGTAATCAGCAACTTCCTGTACATCTTGCTCCTCA[A/G]ACTATGTATGATATGCTAAGCCAACTTTGATTGAGTTTATATCGAGTATTGTTAGATTGA			A	G
723	TM723	A1	13588377	0.988	TTGATGTGCATTTATGAAAAAAATTTGGGGTTAAACTTGATGGGTAAGTCTTTTTTCCCC[T/C]AAGTAAAGAGGATTTTATGGACGATGGAGCAATGAATAAGGAATGGCCTATTCTTGTCAA			T	C
724	TM724	A1	13592522	0.965	AGATAAAAGTAAGTTCTTTTTAGTGTATTTCCTTTCAGCATGTTGACAGATGAGCGAACA[C/T]GGTTGTTCATATGTTAGCAAAAGAGAGGATGTTGATTTCGGAAGATAGTTTCTAGGTCGA			C	T
725	TM725	A1	13595643	0.996	GGAAAATTACATACAATTTTATTCCTACTCTAAGCAACTTGAAGGTTAGAAAATTAAGAG[T/G]TTGCTTCGAGGGAGAGGAAACTGTGGCACATTGCTTCCATGATTGCAATCTGACTAAGCA			T	G
726	TM726	A1	13602227	0.949	GTGAGTCAATGGCCAAGCCGTGTGAATCGTGAAAGCCTTGGTCGATACCCTCGAAAAACA[T/C]AGGTGTGTGAGCTACCCGTGTGGTAAGGCTTAGGCTGTGTCATCTTCTCGATTTGGTCCG			T	C
727	TM727	A1	13613235	0.988	AAATCTGCTGTAGAGTAGCATCAATGTTGTCAAATTGTTGAAAACACTGCTGCTCGAATC[A/G]GGTGAGGCGCTCAGAGATGTCAACATATGAAGTCGCCGCATGAACTGGACGAGAGGGTGG			A	G
728	TM728	A1	13619388	0.935	AATCTTTGACTCTTAACATACCATTCCTAGGTGTGACATTAATTAAGGTTTCTTTAATCT[C/T]ACACATACTCTTATGAAAGTTGTCCATTGAGTGGCAGTCACTAAAATATTTGTATCTTGA			C	T
729	TM729	A1	13622704	1	TTCAGGCTACTGACACTAGCTTCAGACTAAGGTTCGATGCTACTTACAATAACTTCAGAG[C/A]ATCTACAACATATGTTGGATCTCAAGGCATCTTATTAATCCTTGATCAAACACCTTTTTT			C	A
730	TM730	A1	13631890	1	GTTATCAGAACACTGATCGAATATAAGTTTTTCACTTACCTTAGTCATATCTCATACTGA[T/C]AGATATAACATTTCGGGTCTTATTCAAGTCTATGGACCCCACAGATGGTCTAATTATGCA			T	C
732	TM732	A1	13642872	0.996	AATAACTTGAATAGTGATTTTCACGACTTAAGTAGAGATATTAAACAGAACGAATTTAAA[C/T]TTGCTAAGGTTCTCTAAAAACACTCTCATGTGACGCCGCCGAATTCAGCCATAACGTCTA			C	T
733	TM733	A1	13650635	0.935	TAGGTACATTTTTAATCCAAGTGCATGACAATGACATCTTAAGATTTTTCAAATTTCAAA[T/A]TTTGTTTTTGATGTGAATTTTGTAGACAAGGTCTAATCCAGATCTGGGTTTGTGTCTTTT	Gh_A01G0714	intron	T	A					A01	13649630	13651601	+	AT5G55730	FASCICLIN-like arabinogalactan 1	Q9FM65	FLA1_ARATH Fasciclin-like arabinogalactan protein 1 OS=Arabidopsis thaliana GN=FLA1 PE=1 SV=1
734	TM734	A1	13657001	1	ACCATGTCCCGGCGTCGGATATGGGCGAGGGGTATTACATAAACTCTCTCAAAAGAGTAA[T/G]CAAATAAGCAAATAAACAAACAAATAAACAATCCTTACAAGGTTAAAATGTTTGCAAGTT			T	G
735	TM735	A1	13664227	0.935	TACGAGATCTTTCTCCTTGTTAGATTCAAGCTTCAACCCTTCTTTTCTTTGAAGTTTTGT[T/C]CCCTTGTTAAACTTCATGAATCTCTTGAATCTTTTAGTAAAAATGGGAATTTCTTTATCC			T	C
736	TM736	A1	13667521	1	TGTGTGACTTTTGGTTAGATGGTGCGGAATTTTAGAGTACCTCTTCAACAATTACTGGAG[G/T]CAGGGGATATTGATCTTTACTTTGCCAATTATTTTACTGTCAGCTGCAGTCTTTGTTGGA			G	T
737	TM737	A1	13669686	0.935	TTAAGAATTTGATAAGTTTAAGCATATGTTTTTTGATCAAAGTGCCAGTTTTCTGTTGAG[G/A]ATTTATCAAATTTGTAATAGCGAATTGTCAAGCCAATATGACTTGGCCTCCGAGAAAATC			G	A
738	TM738	A1	13675448	0.965	CCTTGACTAAAGAAAGTTTCGCTTCAGAAAAAAAGAAGAAACCGATTGTTTAGTCAAGGG[G/A]AAAGAATCTGACAACGAGTGAGTTTTATGGAATTGAAACGCCGCAAAAATTATAAAACAC			G	A
739	TM739	A1	13681702	1	TCTGTCTACCTTTGCTAAGCATAATTCGTTAATGTATTTGAAAAGCTCGTGCTTTTGGGC[A/T]AAAGGTTGAGCTGCATATTCTTCAAACGGCATCCACTGAAGGAAACAAAAAGGGCAAACA	Gh_A01G0716	exon8	A	T	TTT	TTA	F	L	A01	13681528	13684773	-	AT5G47650	nudix hydrolase homolog 2	Q6NPD7	NUD10_ARATH Nudix hydrolase 10 OS=Arabidopsis thaliana GN=NUDT10 PE=1 SV=1
740	TM740	A1	13687902	1	ATTAATTTAAAGTGACCTTTTGAAGGTTTGCAGCGTTTTGGATTTGGAACAACGCAGTAT[G/A]GTATTGAGTTTATTGGATAGTATTGAGTATGACTCCTATTTCAGTTAAATTTGAGAAATA			G	A
741	TM741	A1	13690356	1	AAAAATGTCATTAATATATTTTGATATATCGAGATGCACCTTCTTGCATCTAATGCTAAA[C/T]ATGCAACATGAGTACCTCTCTGTCTGAATATGCACACAATTGCACCAACCTCCTTTAAGA			C	T
742	TM742	A1	13693994	0.988	TTTAATACATGTTTCATAACCAAAGAGCAAGCTACCAATTCCAACAATTACAACACATCC[T/C]AAACATAAGGATTACTGAAATATGACATTCATCTCTCTGGAAACAAATCCATATACCCTA			T	C
743	TM743	A1	13696359	0.935	TTTGCGAACAAAATCGGGTTTAAATCGAGCTTGTGAAAGCTCTAAAATATATTTGAAGTT[C/T]AATAGGGACTAAATTGAAACAAACAGAAACCATGATCAGTAACTCACAGTCAAACATGAC			C	T
744	TM744	A1	13759237	0.965	AGCGATGAACGATGAGCGTTTGTAATTTGTGGGGTGAGAATATGCGAATCAAGTTTTATT[C/T]TAGTTTCAGCTTTTGCCTTTTCTTTTTTCATAAACATAAAAAAGTTTTAACAAATGAAAA			C	T
745	TM745	A1	13798594	0.996	TAAAGGTTGTTGAGATTCTCTAAAACAGGTTCATGAGGCTTAGAATTTGCACTTAGCCTT[T/C]TCAACGAGTATTCATCATTTCTCCGCATTATGGGACTGGCGCTTCCATCCATGTCCTTTC			T	C
746	TM746	A1	13836574	1	ATCTGGCTTTTATAGCCATGTATACATCTTTTATTTCTCTGTCCTACTACTGTTTAATAA[C/T]TGTTTTGCATTGTTTTGATTCTGCTTTGCGTGTTTGTAGGTGATTGTGGCAGAGTTGTAG			C	T
747	TM747	A1	13843512	1	TTCAGCTTCCAAAGCTAAACATATCCCCAACTACTGGTTGAAGCGTAAAGACCACTTTCT[G/A]TTTCGATCTTGCATGACTCCTCCTGCGGTTGCAGTGCCTAAGTTCGCTTTAACAACTCTA			G	A
748	TM748	A1	13847177	0.965	CAAGGGTCTAACCAACATTTGATTCTTCTTCTATTAACCACTGACCATAACAAATTTTCA[T/C]GGGTTAAAGGCTAGACTTTTGAAAGTGCCCTCTAAATAAAGAAACAACTAGATCATAAAA			T	C
749	TM749	A1	13850335	1	TAGCAATAGTGGAATTCATAGCTTAATTAAAGAGTTAATGATATTCTCTCGTTAGCATTG[C/T]GTGGATTGATAAATATGAAACGTGGCCACGAGTTGCTAGTTCTCGAACGTACAATTTATC			C	T
751	TM751	A1	14034650	1	TTATTTGAGGACATTTAAGGCTATTATTGCTGTCCCACAACCGCCTAAAGAAGCAGAGGC[A/G]AGGTGGCCGTAAGCTGTAATGCTAATTGCTATCCGGCAAAAATGCTCAGAGGTTGAGATT			A	G
752	TM752	A1	14040108	0.988	ATAAGCAGCTGGTAGTTGCTCTGGAAGAAGCTGAAGCTGCAAAAGAAGCCGAGACTAGGG[T/C]ACTTGATCAAATAAAGATGCTTTCTGAGAAAACAAATGCTGCACGTGCCTCAACCTCTGA	Gh_A01G0727	exon5	T	C	GTA	GCA	V	A	A01	14036948	14040703	+	AT5G55860	Plant protein of unknown function (DUF827)	Q9LVQ4	Y5586_ARATH WEB family protein At5g55860 OS=Arabidopsis thaliana GN=At5g55860 PE=2 SV=1
753	TM753	A1	14045497	1	AAGGTCTTGTTTCATACAGAGTCTCGTTTAAAAAGAAAAGGCATGCGCAATTATCCACAA[C/G]AAGGTGGTATACCAAGTTACACCGGATCAGTTGTCTACCAAGTCTGCATCGAGCTGATGC	Gh_A01G0728	utr	C	G					A01	14041980	14045146	+	AT4G26620	Sucrase/ferredoxin-like family protein	C5DDQ4	AIM32_LACTC Altered inheritance of mitochondria protein 32 OS=Lachancea thermotolerans (strain ATCC 56472 / CBS 6340 / NRRL Y-8284) GN=AIM32 PE=3 SV=1
754	TM754	A1	14079287	1	TTTAAGGTAAACAACACCTGTTTAAAACTGTATATTGATGAGATTGGTAGCAGGAATAAG[G/A]AGTATAAACTCCTCAAACCACCATGATCATTCAACGGAGAGGTAAGTCGAGCCTAGACTA			G	A
755	TM755	A1	14082664	0.965	GAAGGTTAGATCTACATCAGAATTGAATAAGAACTAAAGTGGAATCGTTGGCTGAAGGAA[T/C]CGATGGTAAGTTTTTGAAACTATTTATTTATTTCGAGAGTTAAGAAAACCCGAAACCCTT			T	C
756	TM756	A1	14086813	0.996	AGGAATTACTCCAAGGAAGCCGATTGATCCATCTCAGAAGTCGGATTCACCATCAAGACT[G/A]AAGATCTCTCCTCAATTTCCCCTTCAGGAGTTTTGGGTTTTCTTTATGTTTTGTATTCTT			G	A
757	TM757	A1	14116778	0.965	ACAAACTCCAAAGGAAAACACGTAACTCAATTTAAAGTGATACTTACCGAATCAACAAAA[C/T]CGCTAGCTATACGTCTAAGCTTATCGAAAAAGAAGAAAAACAAAAGAGAGGGAAAGGAGA			C	T
758	TM758	A1	14119746	1	TTTTAGTTAGTTTAGCGACCATCATGAATTCCACAAGCAAGTCGTGCATAAAAATGGAAG[G/A]CTTTCTGTACTTAAAAGATGTTATCGAGAAGGGCATTTAATAAGGTCATCTCCGCTAGTG			G	A
759	TM759	A1	14123748	1	GCACACGGGCGTGTGGCTTGACTATGTGATCTAAATCAAAGAGCTCCCAAACTAGGACAC[G/A]GGCTGGGACACCGTTGTGTGTCCCTATTTTGAATGCCCACACAGCTTGAGACACCGGCGT			G	A
760	TM760	A1	14126983	1	AATTGACTATGGCATGCTATTAGTATGCTAAGTGCCTTAGAAGCAAAGGCTAAAAAGACA[C/T]CCTAAGAAAGGTGAAAGGTGAAGCCAATAAACTTTCACTAGCAAAGGTGGTCGAAGAAGC			C	T
761	TM761	A1	14139788	1	AATCCCTGGTAACAATGGTAACCAAAAACTTAAGTGATGAGTGGGCAACCCAAGCCTTTA[C/T]ATCTGGTGTAGAGCATGAGTACCTAAAATATGCTTTAACAAATGAAAAGCCTGATAAACT			C	T
762	TM762	A1	14169120	1	AACTTGTGAAATTATTTATTTTTGTAAAATACTCTCGTAATAGAAACATGTTAAGAAGCT[G/A]ACGAAAAGACCCACTTTTCAAGAGAAATTATTGGTGGCTGGTGGAATTTCAACAACGACA			G	A
763	TM763	A1	14171411	1	AGGAACTTTCTCTCTCTTCTTCTGCAAAGACTTGATCTTTCTGTGTTCGAAAAACTGTCC[T/A]AGACATGGAGTTGGTTCCATATTCAAGTGAACCAAAACCCAAACCAAGCTCCTCAACTCT	Gh_A01G0735	utr	T	A					A01	14171416	14173463	+	AT5G55960	0	Q9H330	TM245_HUMAN Transmembrane protein 245 OS=Homo sapiens GN=TMEM245 PE=1 SV=2
764	TM764	A1	14173944	0.965	ACTCTGCTTGTATTTCATTAAGTCTCAACCAAATCAAGAATGCATACATCATTGACATTT[A/G]AATGACCATTTAGTATATTTACAACAGCAGCCATAGCCGTAGGAGATATACACATCATGT	Gh_A01G0735	utr	A	G					A01	14171416	14173463	+	AT5G55960	0	Q9H330	TM245_HUMAN Transmembrane protein 245 OS=Homo sapiens GN=TMEM245 PE=1 SV=2
765	TM765	A1	14181040	1	AGCAAAAATGAACAGATTGAAACTCATTCATCAGACTAGATCATCAAGCAGCTGGCAGCA[G/A]ATATCTAAGTAATTCTTCAGTTGCACTTAACAAAGACATAAAGCATTAAGGTTCTTTTAC	Gh_A01G0736	intron	G	A					A01	14174120	14183067	-	AT3G13070	CBS domain-containing protein / transporter associated domain-containing protein	Q9LK65	Y3307_ARATH Putative DUF21 domain-containing protein At3g13070, chloroplastic OS=Arabidopsis thaliana GN=CBSDUFCH1 PE=4 SV=1
766	TM766	A1	14187356	0.996	CGCCCTGGCTTGACTTCCACTATTGTTACCCCCCCGATGACTCGACCTCTAACTTCTCTC[C/T]ACAGCCACCATCGCGCCCCTCTGATAATGCTCTTGTATCCAACTTTGTTACTATTTCGGA			C	T
767	TM767	A1	14191853	1	AGGGCTTTCATCAGGGTGTTCTCCATTCCACCCCCTCATTCTCTTTCTCTTATGCTTGAA[A/T]CGTCTCATGCTATCCTTAGCCAACTTGTGATTCCTTTTCTCCGTGGGCCAGGTTGATATC			A	T
768	TM768	A1	14197193	0.935	AACTAGTTTAATTACAATGAAATTAAAGAGAAAACCTTGCTGTTACACCAAGGATACCTG[C/T]TGCAGCATGTTTACAATCTGCATGCACTTCAACCAAAAATATCACAGCAGCATGGGTGGC	Gh_A01G0737	utr	C	T					A01	14195113	14196396	+	AT5G55970	RING/U-box superfamily protein	Q93Z92	RING4_ARATH E3 ubiquitin-protein ligase At4g11680 OS=Arabidopsis thaliana GN=At4g11680 PE=2 SV=1
769	TM769	A1	14213467	0.858	TTTAACCTCGTATCTATTGTCATTACATTGGATCAAACACTGCTTCCATATTTTTCAACA[A/C]GTAATAACTGCTACTGACTAAAAAGTACAGTTTTCTATCACGATATGTTTAATCTGCTTT	Gh_A01G0738	intron	A	C					A01	14211438	14214471	+	AT5G47770	farnesyl diphosphate synthase 1	P49352	FPPS2_LUPAL Farnesyl pyrophosphate synthase 2 OS=Lupinus albus GN=FPS2 PE=2 SV=1
770	TM770	A1	14218525	1	CGTGCTCTCTCTGTCTTCCATCCAAATGCGCCCATTGACGATAAGATTGATTGTATGTGT[T/C]AAATATTTAAGTTATCTGTATACTTTGTCTCTCTGTTTACCTCTCTTGCTGTAAGTCATA	Gh_A01G0740	intron	T	C					A01	14217721	14219351	+	AT5G55990	calcineurin B-like protein 2	Q8LEM7	CNBL3_ARATH Calcineurin B-like protein 3 OS=Arabidopsis thaliana GN=CBL3 PE=1 SV=2
771	TM771	A1	14227395	1	GATCATTATAATTGCCTACTGCCACTACAATATTACAAGGAAAAAAGGGACAGAAAAGCC[G/A]TAATCTTGTCTTGTGCATACATGCATTGATAATTGGGCATGGATTTCGACAACTTGGTTG	Gh_A01G0742	intron	G	A					A01	14225797	14227787	+	AT4G26555	FKBP-like peptidyl-prolyl cis-trans isomerase family protein	Q944B0	FK161_ARATH Peptidyl-prolyl cis-trans isomerase FKBP16-1, chloroplastic OS=Arabidopsis thaliana GN=FKBP16-1 PE=2 SV=1
772	TM772	A1	14231324	1	CAGTGTCAAGATGTTTTGGGAGGTGACCTGATTTACTTTGACTTTGCTTTTGCCTTGTAC[A/G]CATCTCTGATAGTTGAGACTTTAATGGTCTTAGGTACATAGCTTTATTGCTTCCATGTTC			A	G
773	TM773	A1	14235701	0.988	CCACCTTGCTTGGATTGGCACATAAATTCCATGGTTTATTGACATACTAGAGGTGCTTTG[G/T]GGTTCTTTCTGATAGTTAATTGTAGTAAAAAATTAAGGCTTAAAAACAAAGTATGTTAAA	Gh_A01G0744	utr	G	T					A01	14236028	14239424	+	AT5G56040	Leucine-rich receptor-like protein kinase family protein	C0LGR3	Y4265_ARATH Probable LRR receptor-like serine/threonine-protein kinase At4g26540 OS=Arabidopsis thaliana GN=At4g26540 PE=1 SV=1
774	TM774	A1	14239396	0.988	GAACAGTAGTTTCTCAAGGATCTTCTAATTGTTCCTTTGCTTTTTCGGATGATTCAATCC[T/A]ATCATCAGGCGGAGGTTTCAATTTGTAGCTACTTATGTGGTGCATAATTTGTTCATAGTC	Gh_A01G0744	exon2	T	A	CTA	CAA	L	Q	A01	14236028	14239424	+	AT5G56040	Leucine-rich receptor-like protein kinase family protein	C0LGR3	Y4265_ARATH Probable LRR receptor-like serine/threonine-protein kinase At4g26540 OS=Arabidopsis thaliana GN=At4g26540 PE=1 SV=1
775	TM775	A1	14251159	0.965	GAGCTCACTCTATCAAGCCTTCGATTTGGTAGATTTAATGTTCTAAACTCGGTTATGTGG[T/C]ATGTGTCTAGGTTTAATTGTGATTATATGTTTATTTTGGATGTTGAAGAAATGATCTATG			T	C
776	TM776	A1	14254094	0.976	GCGAGGAGTCATTTGCTTCCCCGAGACATGTGTCTGTTCAGGAGTCGGAGGACAATACGA[C/T]TCCGCCAACTTCGGATAGCAATAACTCGGAGCTTGGTACTGAGGCACTGACTCGGGTAGT			C	T
777	TM777	A1	14260182	1	CCTTGTAGGTACACTCAGTTTCAGTAGCTGAAATCGGTATGCAGAGGTCTCGGACAATCT[C/T]TGTTGAAAATAATTTATCGGTTATCTTTTCAGCTTTCGTTTGGTTTACCATTTTGATCTG			C	T
778	TM778	A1	14275104	0.976	TTCCTTGCCCACGGCCCAAACCATTACCACCTCTAGTCGCTCCACGGCCCCTAGGTAGCT[G/A]CTGAATTGCCCTCTGAGGCTGCACAAAACTCAGAGCTTGTGTCTGATCTGCCAGTTATAG			G	A
779	TM779	A1	14279176	0.988	ATCATGTTTTGTATGGATTATGAAATGATTAATTTATTTTAGGTCTAAATTGTGACAACC[C/T]GAATTAGGGCCTAATTGGAATAGTGGTTTTGTGACCACAAATCTGAGATAGAAATAATTG			C	T
780	TM780	A1	14292512	0.996	ATCCAAAATATATTAATAAGAAATGCACTTGAACATGTTAGATTTTCACCTCTTCTTTAA[C/G]TTCTTGGATTTCACCAGTTTCCTTGTTGGATCGAGCTGCCCCAAGTTCTATGGAAGTGAC	Gh_A01G0746	exon15	C	G	GTT	CTT	V	L	A01	14290933	14302550	-	AT3G44730	kinesin-like protein 1	O81635	ATK4_ARATH Kinesin-4 OS=Arabidopsis thaliana GN=ATK4 PE=1 SV=2
781	TM781	A1	14301679	0.858	AGCTATTTTTCATTAGAATTTTTAGATAGGAGCATGATATCACTTCCATACAATTTGTTC[G/T]GTCAGATGTATTTTACTAAATGGATTTTTTTTAAAATTTTGTAAGTACTTTTTTGTCTAT	Gh_A01G0746	intron	G	T					A01	14290933	14302550	-	AT3G44730	kinesin-like protein 1	O81635	ATK4_ARATH Kinesin-4 OS=Arabidopsis thaliana GN=ATK4 PE=1 SV=2
782	TM782	A1	14364303	1	CACCTGTCATAGGCATAACCATCTAGTGTTCTGCTGGTGCAGGTGATTGTGAGAAACACA[A/G]TAAATTACATAATTCATCGATTCCATGAGTGAAAACTCTAGCATAGACATCATATGAACT	Gh_A01G0748	utr	A	G					A01	14364388	14365468	-	0	0	0	0
783	TM783	A1	14497617	1	TTTTTGTTAAAGTGCCACTAATACGACAAATACTGCCACGAAAAATGATGACGTTTAAGA[T/C]AGCTAATTTGCGGCGTTTTAAATAGAGTGCCACTATTAGAGACCTTTTGCGGCATTTTAG			T	C
784	TM784	A1	14674106	1	TTGTAACAGTTTGGTTTTGACCCTAGTCAAAATTATGGTTTCGGGACCACATATCCTAGT[T/C]AGAAAAATATTTTAATAATATTTTTCGTGCCTTTTATAAGTGAATTGACATATGTGAAAA			T	C
785	TM785	A1	14734583	0.988	CGGGAAAGGCTTGATAGAGGGGTGGAAATTGAAGCATGGTTTTCAACTTTTCCACATGTA[A/C]AAATTTAGCATATTTCTTACTCACACTAAGACATTGTCCTCTCCTTTTGACTACTGAGAA			A	C
786	TM786	A1	14770055	1	TAATAATATTCATATCAAGTAACATTACTCAAATATTTTCGTTTCAAGTGTTAAAGGACT[G/A]TAAAGATCGGTAATGCTCTGTAATCCTGTTCTTGCGACGGGACGGAGTAAGGGGTGTTAC			G	A
788	TM788	A1	14803012	0.996	TAGAATATTCACAATTTTTAGATGCAGTTTGGTTAATGGAAAAGTGGGTTTTGAATTGGA[G/A]CAAGGCAGCACTTTGGTTAGGAGAGCACAAATGTGTTGGTGAAGGAGAAGAACATAAAAC			G	A
789	TM789	A1	14873544	1	CCTGTTCCTCAAAAAGCCCCGATAGTGCCACAAGTAATAGATCCGATTTGATTGAATAAG[C/A]CACCTGTTAATAAGATTTGTAAACATGGGGCTGAAGAGTTTCGGGCTACGGTTGACAATG			C	A
790	TM790	A1	14887485	1	ACACGGGTAGAACACACGCCCGTGCCAATCTAACAGGCTTAAACACGACCTAAAATAATC[A/G]CACACGGGCATGTCTCTACCGAGCCCAAGTTGAGTTCAATTCGAAAAAGGCCACTTTTGA			A	G
791	TM791	A1	14961321	1	TAGAACTTTTGATAGGATTTCGGAGGTCACATTGGCCACCAAAATGACTCGAAACAATAC[A/G]TCGTTTAAGCACAAAAAATTTCTTTTTGAAAATCTTTTCTCATGCGAGTACTTAAACCAG			A	G
792	TM792	A1	14970461	1	ATTTCGAAAGTACTAGAATCGGATATACATCACATATAATCATTCGTTTCTTGGAATGCC[C/T]GTTGAACCGTTCGAAATCATAAGGATGTGCAGATAGCTCCGAAAGCTCGTACAATGCCAA			C	T
793	TM793	A1	14995314	1	CAGATACAGATTCGGGCCTGAGCCCATTTCAGATGCAGATACAGCTATGAATATGCAAAT[C/T]AGATATCAGAATCTTACCCCCATCCTCTACATACCAGCTCCGACCATCCCTACACACTAT			C	T
794	TM794	A1	15011608	0.965	TACTCATTTATTCATCAAATCATTCAATTCAATCCACAGACACATATTTGGTGTAACGCC[C/T]CAAAAATGTAAGTATTTATTTTTGTGTGTTGTGTTGTACAAATGTATGTCTGTTTTAGTG			C	T
795	TM795	A1	15061874	1	AATTAGATCGGAGGAAATCGAAAGTAGTTGAATTGTTGTTCGGTTCCGTTCATTCCGTAC[A/G]AGGTAAGTTCATATGCAAATAAATATCGTTACATTGAAATGCTTATGTTATTTTTTCATT			A	G
796	TM796	A1	15168420	1	TGTTTGGTTGAGAAATCATATTAAGTTAGAGTTTGATATGTTGGTCAACATTAGAGTGTC[T/A]TTTAGGGTGGAAAAAGGCTTGGTAGATAGCCTCATGTTGTCCACACGAGTAGACACATGG			T	A
797	TM797	A1	15186020	1	CTCTGATACGGCTTAGAGTCATGTGATTAACTGTAAGCGTGGTACTAAACTTTCGATTTG[A/G]TAGACCGTGTTTGTAATGTACCCTGTGAAATGAAACTGTGTCCGATAACTGTAAAGAAAT			A	G
798	TM798	A1	15195104	1	GTGCCATTATGACACATGTCAGATAATGTGCATCCAAGCTGCCAGAATATAGGCGATGAT[T/C]GCCGTATAAAATACTTCCTCCTCATATACAAATCCCACCTCCACAATCATATACAGTAAC			T	C
799	TM799	A1	15211534	0.976	GAAATCGATCGTACAATTCGCAAAAATCAAAGAGAAATAAGACGCAGCTTATGATACACG[G/A]AGAACGAGCGAGAATACGATACTCGACCACCAACCGACGAGATGGCTAAAAACCAAGGCA			G	A
800	TM800	A1	15323235	1	CCACATCTATAGCATGCGCCGCTCTTTATCCGACACTCTCCAAAGTGAAATTTATTGCAG[C/T]TGTTACACTTTAGCTTTTGGTCATCAACACTCCCCACATTAGTCACCACATGGGAGGAAG			C	T
801	TM801	A1	15405670	1	AAAAATAGAGAAAAGGAGCCAAAGTACGAAATCAACACGGCCTAAACTTCCTCATACGGG[A/C]AACCCACACGGCCGTGTCAATCTGGCAGAATCGAAGCACGACTCACATGGGTAGAACACA			A	C
802	TM802	A1	15499536	0.935	ATTACATGGGAATTCTTTTAGACCGAGTTCAGAAAGAAATATATCAGCTAGAGATTCATC[A/G]ATCAGAAGAGAAAAGAATTTCTTGACTGAAACAGGGTAACAGATTAGCATCTGAGTATGA			A	G
803	TM803	A1	15516421	1	CCATGGCCCACTGTGGACACTCCCTAATACAGTGCTCAAGAGACCTACATATTAGATAAA[C/T]CCCAATCCTCCTCCAACACTTGCTCGGATGGCACCTACCACAATCACTATATGGCTGTAA			C	T
804	TM804	A1	15518724	0.976	ACACGCTCAGATTGGTCTTGTCCATTTGGCCCACACGGCTACACTCAAGCTACCACAATG[C/T]CGTATGCTACGTACAGCCATGCCTTCGTCGACCATACGATCATGTACTCACAAACGGCCT			C	T
805	TM805	A1	15532507	1	ACACATCCCATATGCCCAGCTGTGTGTCACACATGGCCTAGACATATGCCCGTATGTCTA[C/T]CCGTGTGGATGAAAGTAGGTCATTTTAAGGCCACTTTTCTCACCCTTTACACAATCAACC			C	T
806	TM806	A1	15535470	1	GAATCCATATCTAGAAATCCGCACGAAGTGTTCGCAGGATTGTCCACCAAGTTAATCTAA[A/G]ATTACTTTCTCTACTCGGTGGGTTTTCTGCTAAGATTATGTGCAACAAGTCCGTACAAAG			A	G
807	TM807	A1	15539683	0.988	CGCGCCTCAATGCAGTGTTTTGGGATCGGGGATATTTCTATCATTGGTCCCTGTGAATTC[A/G]TGCGGATTGCGCATGGGTCCCTATTTTAATCCCAGTAGTTTATTTTATTTTTAAATTATC			A	G
808	TM808	A1	15544500	0.988	TTAGGGACAGAAATACAGCTTTCTTTCGTAGTCTTGCAACACAAAAGTGGCAGAGAAACA[G/A]CATTTGAAAGTTACAGAATACAAATGAAAGAGCGACGGAGGATATGCAAGAAATGACAGA			G	A
810	TM810	A1	15567698	1	TCAAGAATCTTTTCGAGCATGGCTTCTTGCGTAGAAGATTTCGAGCTTTCAGAAATGCTT[C/T]AAATAGTGTAGTCTCACTATTTGACCCACCGTTCAAAACGCCTTGTTCTTTAAGCCCGGG			C	T
811	TM811	A1	15575185	1	ACCTAGCCAACTGCTCTTGTAATTCCTTTTAGATTCTTTCTGTAGAAGCCCAAATTGCCC[G/A]GGCCCGATTTCATCAAAACCCAACCAAACCTCTAAACCCACTAAAACCCTTAACCCATGA			G	A
813	TM813	A1	15586760	1	AAAATCTGCTTTTCAAGATAAGTTTCAAAAATCAACTCATATTGCGAGAGGATCACATGT[A/C]GAGTAGAGAATAAAGATTGAAGCTGATTGAAGACGTCAGCTTTTGTCTCCTTAAAGTTGC			A	C
814	TM814	A1	15591131	1	CATGTCGGGATGGTTCAGAACCAAGTCTCGTAGGGAAGACCATGGGATACAAATGGTTTC[G/A]TTCTTCTTCTTTATCTGTTTTTCGACCCACGCGTCAGTCATGTCTGTCACTCTTACTAAC			G	A
815	TM815	A1	15601677	1	TCACCTCATTCCCACAAAACACTATACCCGCTCAAAGCCAACCCAGAAATGAACCAAGAA[T/C]AGCAACGCCTAATCCCGAGAGACCGCAGTTTACTCCCATCCCTGTGTCGTATGGGGAATT			T	C
816	TM816	A1	15625600	1	GGGTGAAGCTGTGGCTCAGGTTCAGGAGGTAGTCGATCATTTGCAAACCTTGGCAGTTCA[A/G]GCTAATGTATTAAGCTTAAAGTACGAGTCAGAATCAGATCGAGGCTGAAGCTTAGCTTGG			A	G
817	TM817	A1	15630669	1	AAAACAAAGGTGATCCGATCATCCCTAATAAAGATCGGTGGCGACTCCCGTTTTAATTTT[C/T]GCTTTTAAACAAAGTCGATTCCCATTTTCAAAAAATAGTTTCGATATGATATATCTAAAT			C	T
818	TM818	A1	15634584	0.965	TGTAATTTTAGGGACTTCATGAATCGCACGACCACAGCCTGTTACATGGCCTGCCACACG[G/A]TCATTTCCTTATCATAGGGAATTTTATCGTTGTTCACACGACTTTAGGCTATTACACGGT			G	A
819	TM819	A1	15641558	0.988	ATAAAAAATGGGTTTTCCATGGAGAGTGTACATCTAGTCGAACTTCTTCAACGATTAATT[C/T]GACTTATCCTGATACTAATTACCATCAGTATGTTAGACAAGATGACATGAAAGGTATGTT			C	T
820	TM820	A1	15645415	1	ATTTTAATATAATAATATACCGTTTTTCAGCTGAAAATGGTGGGAAGCGCAGAGGTCAAT[G/A]ACGTATGCTGCTTAAAGATTTATACGACTTAAATCCTGTCGAGCGTGTCAAAGTAAGTAG			G	A
821	TM821	A1	15649227	1	TATAAAATTACCGAAATACCCTTGTAGGGTAGAAATACCGAAATACCCCTGTAGGGTAGA[A/C]ATATCGAAATACCCCTGTAAGGTAGAAATACCGAAATACCCCTGTAAGATAGAATTACTG			A	C
822	TM822	A1	15654305	1	ATTCTATCGCATGACACCAAAAGAGCTATTTTGAGGGGTACACAGGTTGAACGATTGACC[C/T]GAGAATACTTTCGAGAGGCCATCCAGAAAAAGTATGTAGGCACAAGGTATGAGGAGGCCT			C	T
823	TM823	A1	15658763	0.996	TGAAGCAGACAAGCACGAATCGACTGAAAAGGCTGAAGAACCTGTTGAGGACACAGGAAC[C/T]AGTTTACTCATAAAGCAGTTCTTTGAAAAACATCATAGCTCTAAGGTTGTTCTACTCCTT	Gh_A01G0765	exon3	C	T	ACC	ACT	T	T	A01	15657916	15661363	+	AT2G30070	potassium transporter 1	Q652J4	HAK13_ORYSJ Probable potassium transporter 13 OS=Oryza sativa subsp. japonica GN=HAK13 PE=2 SV=1
824	TM824	A1	15668879	1	TCAAATAGGTTTTACGGTGGCCGGATACATATTAAGTGGTTGGAAACCAATTTCAAAGAT[C/T]TTTCTAAGGATGCACCTGATGTCGTCAAAGAACAATACGCTCGAGCATTCATCTTCAGGT			C	T
825	TM825	A1	15673031	0.935	TACGTGCTCAGGGATCGTTAGTACAGTCATCCACATTATCTTCAATATTTTGGTACTTTT[G/A]AAAGTTGGTTTGGTACTTATGGCATGTATAAGCTAATAACTCTTTTGGAGATGTTTAAAT			G	A
827	TM827	A1	15691855	1	CGTGTCACACTGCCGTATCTTGCTTCGTTTGCTTCTCCCACACTCATGTACATAGATCCA[C/T]GCCCGTGTTAGTTTTAACAGTGTCGACCACAGGTGGATGGCAAGGGCATGTCTCACGCCC			C	T
828	TM828	A1	15696932	0.965	CCGTGTTTTTGATAAGCTGTCCTGCACACCCGATGAGTGTCTAAAATGCACTATATATTT[T/A]TTACGAGATTCGACCTATTATTGGTGGAGAACTCTGATTTCGATTGTTTCGAAAGAAGGG			T	A
829	TM829	A1	15703856	0.996	ATATTTTTGGGCTTAATGGGCCAAAAACGGGATAATGGGCCAACAGGCCCAAATTGGTAA[A/G]AAAATGCGGTAAGTGTTTCTGATTGTACGTAAATGGCTATGTTATGTATGAAAACCTTAA			A	G
830	TM830	A1	15709796	0.949	AAGTCCAAGCAGTGTCGATTTCCCACGTGGGTCCATTTTCTCCGTTTTCGGCCCGTTTCT[C/T]GCTCTTTTTACTCTCCTATGCTTACCTAAGTATAAAACATGAAATTAAAGGATTAGGAGC			C	T
831	TM831	A1	15712643	0.965	TTCTCTTAATTCTAGTTTGTAGCTCACGTAATTGAATTGTACAGTTGAAAGCCAATTCCA[C/T]GGAGTAGGCTCCTAAAAATACGACCTTGAATTTTGTATTATAGATTTAACTGTCGTAGTA			C	T
832	TM832	A1	15720040	0.988	CTAGATTTCTTCGACGAGGAATGATAAGATTTACTCATCAGTCTCTTCCTTAAATCTTTT[G/A]CCTCTAAATCAGCCTTTCTCTTTTCTTTGATGAGATCATTGGCTTCACAAGCCCTCTCAA			G	A
833	TM833	A1	15723044	0.988	ACTTTGGCCTTAAACTTTCACATTTCTTTCAATTTAGTCCTTATTTCACAAAAACACAAA[A/T]TACACAAAATTTGACAAAATCCATGCTTGGCCGAATTCTCTATAGGTCCCTAACAGCCCA			A	T
834	TM834	A1	15731381	1	ATGAAAAATCACCTGATACTCGGGAAATGCTAACACAAGTTGTGACTGTATCATGTAACT[A/G]TATATGTTCACACGAGTTGTGGAGAATCCGCAACAAATTCAGGACCTTAGCCTTCGGTAG			A	G
835	TM835	A1	15736881	1	GTTTTAATTAGGTCCTAATTCCATTTGTTTTTCTTTTGGAAATTATACCATTTAATTTTT[G/T]CTTTTTCAATTTAGTCCTTAATCTGCTGACCCTCTAATGAATGACGCGCGTCCCAAGAGC			G	T
836	TM836	A1	15758279	0.988	ACTCCCAAGCATATATCATAGCGTGTTGTCCAGTTGAGATCCAAACTTTTTCCTGCTTCA[C/T]GAAAACCATAGGTAACTATATACATTCAATATTTTTCCAATTTTACATCTTCGAAAGATA	Gh_A01G0767	intron	C	T					A01	15757130	15770128	-	AT5G07280	Leucine-rich repeat transmembrane protein kinase	C0LGH2	Y1561_ARATH Probable LRR receptor-like serine/threonine-protein kinase At1g56130 OS=Arabidopsis thaliana GN=At1g56130 PE=1 SV=2
837	TM837	A1	15760925	1	TTTAGTTAGTATTAAAAACTTTAGCACCATCTGGAATACATCAGCTTTCAGGATAACAGT[G/A]GAAGGGCAGGACAGGGAAGAATTCCATAAAGAGGTACAAACCTGGATATAAATATCAAAA	Gh_A01G0767	intron	G	A					A01	15757130	15770128	-	AT5G07280	Leucine-rich repeat transmembrane protein kinase	C0LGH2	Y1561_ARATH Probable LRR receptor-like serine/threonine-protein kinase At1g56130 OS=Arabidopsis thaliana GN=At1g56130 PE=1 SV=2
838	TM838	A1	15763446	0.858	TAAGATGTCCCTAAGATTCGCATAAATGAATATACTGGCAGTAATAAACAATTAGGCCAA[T/A]TAAATTTGTATCTTTGTATATCATCTTCTCATTGAGTTGAAGGATACAAGTTGCACTTAC	Gh_A01G0767	intron	T	A					A01	15757130	15770128	-	AT5G07280	Leucine-rich repeat transmembrane protein kinase	C0LGH2	Y1561_ARATH Probable LRR receptor-like serine/threonine-protein kinase At1g56130 OS=Arabidopsis thaliana GN=At1g56130 PE=1 SV=2
839	TM839	A1	15765594	0.899	GGTACAGAATATAATAATATGACCACTCAGGTAGAAGAAAGGTAATTCCATCAATAAAAT[G/C]TGCTACCAAGTGGATATAAATGATTTACCTTAACTGTTTTACTCCATATAGTTTCACTAT	Gh_A01G0767	intron	G	C					A01	15757130	15770128	-	AT5G07280	Leucine-rich repeat transmembrane protein kinase	C0LGH2	Y1561_ARATH Probable LRR receptor-like serine/threonine-protein kinase At1g56130 OS=Arabidopsis thaliana GN=At1g56130 PE=1 SV=2
841	TM841	A1	15777129	0.996	ATTGGCTCAAAAGGCCCACATGGCCCAAAAAGCTAGCTTGTGTGGTCAACATGGTCTACC[G/A]ACATAGGTCGTGTAATAACACATAGTAGTGTGCTCCACACCGCCTAGCACATTGCCAACT			G	A
842	TM842	A1	15786291	1	CGAAGCGAGAACTGCACTCTTTTTACCTCGTGAGTTTGTCATTATATGCGGTGGTGGTGG[T/C]CGGTCGTCGGAGGACCGTGGTCAGAGCTGGTAGCACTGACGGTAGAGAACAGGGACGAGA			T	C
843	TM843	A1	15789700	0.965	CTCACTATCAAAAAGTAAAGGTCCTGACGGGTTTCTTCTAGTCATAAACTATAAAAGCCT[A/G]CCTGAAGTAAATAAAAGAAAATTTAGTAATTTACGCAAAAATAAAATTAAATTGCAATAA			A	G
844	TM844	A1	15793410	0.949	CGTGGTTAAGGCTGTTGAATAGGCACGGGCTTGTAGTCTACCCGTGTAAGTCGTGCTTTG[G/A]TCTTGCCAAATGGACACAACCATGTGACACGCCCGTGTGAGGAATTCCAGACCATGTTGA			G	A
845	TM845	A1	15798798	1	TAAGTATTTATAATTAATCGTTCTTGGAGCTAACTATTATCACGATGAAGGCAAGTGTAC[A/C]TATCGAATAGTAGTATAGCTTTAGCAAGACCGGATTGTCGAGCCCAAAGGAACCAAGAAT			A	C
846	TM846	A1	15808570	0.935	GATATGAATAAATAAACATGATCTTGTAAGAGATGGTAGCTAAGTGAATTACCATGTTCG[T/C]ATACAATTTCTTGCATCCTTAACCGAATAAAACATCTAAAGGATTATGTGGATGATTAAT			T	C
847	TM847	A1	15820933	1	TTATTACCTTTACCTTGTTTAGTGTAAATGTATCAATTGATATGTTCTCACCGCGTGCTG[C/G]AAAGTTCGGTTAACTGATTTAAAGCTATTGTGGATGATTCTTATGTTTCTAAAATTACAC	Gh_A01G0768	intron	C	G					A01	15819411	15826354	+	AT5G17250	Alkaline-phosphatase-like family protein	Q8TEQ8	PIGO_HUMAN GPI ethanolamine phosphate transferase 3 OS=Homo sapiens GN=PIGO PE=1 SV=3
848	TM848	A1	15824679	0.988	TCAAATTGCAGAGGAAGCTTGTTTGTTAAAATGATGTCTATTTTATCTGCATGTAGTTCA[A/G]CAATTATTATTCTCCAAGGAAAACAAGGTGCATTGGTTGCATTAGGATCCTTGTTAGCAG	Gh_A01G0768	exon14	A	G	ACA	GCA	T	A	A01	15819411	15826354	+	AT5G17250	Alkaline-phosphatase-like family protein	Q8TEQ8	PIGO_HUMAN GPI ethanolamine phosphate transferase 3 OS=Homo sapiens GN=PIGO PE=1 SV=3
849	TM849	A1	15826911	1	GTAAGCTCTCGTCTTTCAATCTTCAAACCAGATTGTCCTTACCCATTCATAGCCCGGAAG[A/C]ATATGTTCAATACTCTCCTCCATGCATTGCATATTCCACAAATAGGAGAATAATGACACT	Gh_A01G0768	utr	A	C					A01	15819411	15826354	+	AT5G17250	Alkaline-phosphatase-like family protein	Q8TEQ8	PIGO_HUMAN GPI ethanolamine phosphate transferase 3 OS=Homo sapiens GN=PIGO PE=1 SV=3
850	TM850	A1	15829171	0.988	AGCCATTTTAGGTCAAGGATGAGATGCTAACCATATGCCTATAAATAGGATTGCATTGAA[C/T]AGTTTAAGGGACCTTTTTCCTCCCATTTAATTTTACTTTCATTCGCAATTTAGGTTTTTA			C	T
851	TM851	A1	15833451	0.976	GCTCACATCTGTTTGTCTGTTCTGTTCAGGTAATCCTCAGACATAGGCCGGTCGATGCGA[C/T]GGAGGCTCGGCGGTAACTACTTGTAACAGCCCAATTTAGACCCTAATCGAAACGGTGGTT			C	T
852	TM852	A1	15839310	1	ATGGAACTTTAACACATGCATATACTCGTATTATAGGCCACATAATAATCATAAAATAAA[T/C]ATTTTGATATCGGATTTGTGGTCCCGAAATCACTATTCCGACTAGGCCCTATTTCAGGAT			T	C
853	TM853	A1	15843151	1	TGTCAAACAACTCCAACCCAATGTGCACTTTTTGAATCGAAGCTGAATCAACTTTAAAGG[C/T]GAATTTGTACTATCCCATATACCGGAGAGACAAAAAATGCTGCGTTGAGAAGCTTTTTGA			C	T
854	TM854	A1	15848295	1	AATTGGCATTTCTTATAATATGTTTGATGACCACACTCCAATCATGCTTGCAGAATTTTT[A/G]AATTCTTGAGGCAAAGTCTCTATTCGTAAGTCCCTTAAGGTTACCAAGGATATCTTTTTA			A	G
855	TM855	A1	15890678	0.976	CTATCACATTTGAAAATTGACCCAACCCATGTCACCACTGCCACTGACCACTTCTGTCAC[C/A]TGTTGCCGTCAACCACCATGAGTAACAGTAATTAAAGTTGTTTTTTCTTCAAGCCCCATG			C	A
856	TM856	A1	15999635	1	ATTTTGCAGCTGAGCTGCCAGATAACAGGCTTAGAAGCCTTTCAGATACTGCCTCCAAAT[T/A]TCATCAACCCACCCGATGCAATGCAACATACCATAAATGACATGTGAATATGCTAATAAC			T	A
857	TM857	A1	16003540	1	TTGAAATAATATGGAAACAGTAATAATACCCATGTGAACTTAGGAAATGATTGGGATACG[G/A]ATGACAAGCCATTAGGGTCCTAAAAAAGGAAAAGGGTGTTTGATCAGACATTAATATAAT			G	A
858	TM858	A1	16083828	1	ATTCAAAAAGAAAAGACCAGAGCCGATCGATGGGAGAGAAAATTCCAAGATGCTTAGGTT[C/T]GAAAAGAGGCCCTAGAAAAGAGTGTGTCATAAAGGCGAAGTGAAAAAATTGAATTAAAGG			C	T
859	TM859	A1	16120098	0.988	TGTGGAAAACCCACTGCTTTAGAAATGAATTTGTCCTGATCAATGTAGTTGTGTAGTAGA[T/C]GTTGTCCAATATCGTACACCTGAATAAGGAAGGTGGAACTCAATTGATATTACTCTTCTC			T	C
860	TM860	A1	16122785	1	TGATTTAAACGTATCGGATTAGTAGCGACTATAGATCTCGTTTGTGCGTACATTTCACAT[C/T]AAATCAATGTAAGTAGCCTGGTCGATTTGGATCTGAAAATTATTATGGTAATGCTGATTT			C	T
861	TM861	A1	16125975	0.996	TAAGAGTATAATTAAGCCATGTTAAATACTATTGAAGTCTTTAAGTGTGAATGGGTGATA[G/A]AGGGTAACCAAAGGCTTGGAAAATAGCCCTAAAAAGGTCCACACGGGTAGACACACGGGC			G	A
862	TM862	A1	16129148	0.988	GACCCATTTCATAGCTCGTGTGAGCATTAATGTAAAGGAAATGTTACGATTATATGTAAA[G/A]GCACACTTCATGTGAGCTTTCTTGAGTATTCGATGTAATTCTAGATGGTTCAACGAGCAA			G	A
863	TM863	A1	16135289	0.935	TTTAATTGACTCGAGGTCGACGCATTCATATATCTGCATGGGATTGGCGTCTAGTATGAA[T/C]ATACCTGTTGAACATATAAAAGATATTATTAGAGTGTCGAACCCACTAGGCAGATCAGTT			T	C
864	TM864	A1	16148640	1	AAGAGCAAGAAACGGGCTGAAAATGAAGAAAATGGACCCACATGGGAAATCAACACAGCC[A/T]GGACTTCCTCACACGAGCATGTCACACGACCGTGTCCATTTGGCAGGGTCGAAGCACGAC			A	T
865	TM865	A1	16153615	1	GTCCCCCTTTTAAGTGCCTCCTTAGGTGTTTAAATAGGCTTTAGAATGCCTAAGAGCCCT[C/T]AAAATTGGCCTTTTCGGAATTGGACTAAACTTGGGCTCGGCAGGGACACGCCCTTGTACG			C	T
866	TM866	A1	16157524	0.988	AGGGATTTTTGGGGAGGGATATGATGAATAGTGAGAGGTTTATATAGATTTTAAGGCACA[C/T]GGCCGTGGGACAAGCCCGTGTGGCCTAATTTTTGCCCCTGTGTTTCGCAAATTTTGAATT			C	T
867	TM867	A1	16163890	1	GGCGTGTTGCACACCCGTCTTACATTCTCAATTTCAACCACAGTTTCAAGGTACGGGCGT[G/A]TCTCATGCCCGTGTTGTTTTGGCAGTTTAGCCCACGGCCATGTCGCACGACCGTGGCAAC			G	A
868	TM868	A1	16168084	0.976	TTGAATTGGACTAAACTTGGGCTCAGCAGGGACACGCCCGTGTGCGATTACTTAAGGTCG[C/T]GGTTAAGGCTGTTAAATGGGCCTGAGCGTGTAGTCTACCCGTGTAAGTCATGCTTCGATC			C	T
869	TM869	A1	16173436	1	ACTACACGCCCGTGCCTATTCAACAACCTTGACCACCAGACGCGCAGAGTAGGAGGCAAG[G/A]AATTACTCAAGGGAAGCCGATTGATCTATCTCAGAAGCTGGATTCATCGTCAAAACTGAA			G	A
870	TM870	A1	16178558	1	TATATATTTATCTATACATGAACCATAGCCGAATCAACCTAACACACATCCAAAATCACC[A/G]ACCATTTTCAATGCATATAACACATATAAACTTGACTAGAGTGTTATATACTCACAGATC			A	G
871	TM871	A1	16181841	1	ATTTTATAAACTGTTGATGATTTTTGGTATGAGCTTACTAAGCTTTTGAAAGCTTACTCT[G/A]TGTATGTTTGCATTGTTCTTATAGATATCGAAGCTATTGTGAGCTCGGGGATCGTCGAGG			G	A
872	TM872	A1	16185041	0.965	AGCAAGCATGCATTCATGCATCACAACACACAAACAAGTTAATAAATATTTGGGGCGCTA[C/T]ATTTTACAATTTAGTCCAAATTGCACAAAACAAAACAAAATGCAAAATTTGCACACACCA			C	T
873	TM873	A1	16189672	1	CTCTTTGATACTGACTGAAATGTTTTACACGACAATCCTTTACGTGAATTTCTAGCTTCA[A/C]AGTCAACTTTTCTTTTCTCTTTCCCAAGCTCTTCGACTTTGCATGCTCGTTCAACTAGTA			A	C
874	TM874	A1	16195196	1	TCAGAATGTAAGCTACACGATGCTACTCACACAAGCTGTGGAGTATCCACAATAAATGCA[G/A]GACCTCAACCATCGGTAGGATATTCAAGATGAGTACCCGAAACATAAAAACCCTAATGAC			G	A
875	TM875	A1	16200250	0.935	AGCCTCATAATTGGCTTTTCTTTTTGTTTTACTTAGTTATTCGACTCTATGATCTTTGTC[A/G]ACCAGAACTACAAATTCTTTTAACTCAAGGATCCCAACTAATAGCTAGATGTCTTCGTTT			A	G
876	TM876	A1	16207568	1	AGGGATATACGGTCGTGTACTGAGGCCATGTGTCACACACGGTCAAGCCACACGCCCATG[A/T]GCTCGATCGTGTGGATTGAAAATAGGCTTGGTTGAAGCCACATTCCTCACCCTTTCTCAA			A	T
877	TM877	A1	16212680	1	TGTCCCTTATAAAGCACTACGAGACCTTAAAACATGCTTGAAAGAGGTTCGAGACTAAAC[T/C]GATAACTTATGAAAACTTCAGGAAACTTATAAAATTTTCATGCACACAGAGATCACGTGC			T	C
878	TM878	A1	16216693	1	CTATTCGGCTTAACCAAAAAGAAGGAAAATGCAATTGACAGAAGGAAGAAAAGAGGAGAA[G/A]AGACCAAAAGCTATTCAGTCACGCAAAACAAATGAGAGAGGGAGAGGGTGGACAAGTTTG			G	A
879	TM879	A1	16224332	0.935	GAAATCTTTGTTTGCTTTACATGTGATGAATACTTAGATGACTCTATTTGATGACAGCTC[A/G]ATTGTAGTTGAGTTGAAAGCGAGACCGTTATTTATACAGTAGATTTCCGAAGCTTAAAAA			A	G
880	TM880	A1	16228344	0.949	TTGACCGTGTGACCCAAGTCAATAACCTCCCTTAGATTTCACATGGCCTAGCACACGGGC[A/G]TGTTCTCGGTCGTGTGGTGCAAGTCGATTCCCTGTTTTCACACGAGCGTGTCTGGTAGCC			A	G
881	TM881	A1	16235925	0.965	AAAAGGTTCCCTATTTTGTGACAAGCTACTTCAATCAAAATTTTTGAAAATTTCATGCTT[T/G]TGTCACGACATGCATATATCTGTGCCGACATACAACATTTCAAACAAAAATCCTAGAAAA			T	G
882	TM882	A1	16244776	1	CTAAGCTTTATAGCTTACTCTATTTACTTTCCGTGTTTTATAGTGAAATCAAAACTAGCT[C/T]AGATTTGGGAATCGTCAGAGACTTCATCACACTATCAAGCTATCCATTTGGTACTTTTAA			C	T
883	TM883	A1	16249349	0.935	TATAAAAACTAGATCAAAGTCCCAAGTTCACTTGTAAAATAGCTTTATTTTTGCTAAAAA[T/A]TTTTCTTATTTTGTGTCGTCCAAGCCTTGAACCCAAGGTATAAATACATCTTTTTATTTT			T	A
884	TM884	A1	16252313	1	GAAAATACATATGCGATAGTTAGTGCCGATTGATTTCAATTCCATAATATATGCACTTAT[T/G]AGAGACCCATCTTGTTTGTTTGCATTAAGCTTCACCACTGTAAGAGCATCGCCTTCAATC			T	G
885	TM885	A1	16268475	1	TACATCAATGATTAGTTGAAGCTATAACGATTTCGTACACTTAGTGCCATTACATTAAAT[T/C]GAAGCTATCTCGATATCGTACACTTAGTGCCTCATATAGCCGAAACTATTCTAATTTGCA			T	C
886	TM886	A1	16272228	0.965	ACCTAAAAATAGTAGATGACCAAATCTGATGATTAAACCGAATCAAATCGCTTGAATTAG[T/C]ATCCAAACCAAAGTTACGTCAAAGAATTTCGATGCAAAACCCCAAATCAAAACTTACTAG			T	C
887	TM887	A1	16276735	1	CCGTAAGCTTGTTTCGACGAAGGATAAGGGTTAGGAGTGTTAGATTTAGTAGTATCAGAG[C/T]ACGATTTAGTCAATTCTCGGGCTGAACGCTGTGTGTGAAATGTCTAGAAATACATGCCAT			C	T
888	TM888	A1	16281718	0.9	CGTATATCTTTCTGAGTTGCCCCACACGCCCGTGTATCAGGCCATGTGTTAGGCCGTATA[T/A]CTTACTGACTTGAACCCTAAGAAGATCCTCAAATGACACACAGCCGGATGCCTCAGACAA			T	A
889	TM889	A1	16284725	0.949	ATGGTTGTAGTGTGGGCATTGAAAAATGATCAAGTATGTAACGAAAACCTTGAAAAACAA[T/C]GAACGGCACGATACTGAAAAAGCCCCTATCATCGCCACAAGACCGTATGCTAGGCTGTGT			T	C
890	TM890	A1	16289006	1	ATGGGTAATTATTACTGGTAATCGGAAGTGATAAAACTGCAGTACGCACGATTTCGTGCG[T/C]TTTCATATTTTGGGCTTAATGGGCCAAAACTGGGTTAATGGGCCAACGGGCCCAATTCGA			T	C
891	TM891	A1	16293565	0.935	AAACAGAATAGTATAAAAGAGGGAGAAAACTGAAACTACCATGAATATTGGATGAAATCC[T/C]CAGAATAGTGAAAAGTGGAATTGTAGTGAAATCTAAATGTAGAACATGATTCCGAGAAAT			T	C
892	TM892	A1	16295703	0.915	CGGGGTGGGGGTTGCATTGTGGGAAAGAGGAAGGCCGAGAGAGGGGGTGTGCGCGCAAGG[A/G]AAAAATTAGGAAGAGGGATGAGGCACGAGGGTGGTCAGGTTTGGCGAGGGAAAGGGTTGT			A	G
893	TM893	A1	16300741	1	TTGGGTTGGGCTCGGTGTTACTAGATAAACGACCTTGCTGCCTTTCTGAAACTAATTTAG[G/C]AAGCTGTCCAATTTGATTCCCAAGCCCACGAATTGATGCTTGCTAATTTTTTAAATATGT			G	C
894	TM894	A1	16303174	0.988	TTTAGGTCTTCTTCTAATATGTATTTATAAACTCTAGAATTCTTAGAAACCCTAAAAATT[A/G]GGTTTTTGTGTAAAAAAGAATCAGGGTTTGAAATCAACACTGGCTAGCACATGGGCGTGT			A	G
895	TM895	A1	16311893	0.965	GATTTTACGTCCGAATCGTTTATTCATTTCAACAGGTTAATTGTGTTAAGCATTGGAGCT[G/A]AACCAAATGAAGCAGAATCATTTTGTTTATTTGTAACTTGATTTGGTTGCTTTGTAATTT			G	A
898	TM898	A1	16340076	1	TCTTTTCACTCGAAAATTCAATGTCAGTTGTGTGGGAAGGCTGGTCATCTTGTTGATCGC[C/T]GTTATCATCGGTTTTGACTCTTCTTACAAGAGTACCAACTACAGGCCTCCTCTACAAGCA	Gh_A01G0771	intron	C	T					A01	16338403	16389460	-	AT5G08450	0	Q6R8G3	PHO17_ARATH Phosphate transporter PHO1 homolog 7 OS=Arabidopsis thaliana GN=PHO1-H7 PE=2 SV=1
899	TM899	A1	16374922	0.988	TTTCTTCTTCAATCTCTAGGCTAATGTGCTTCTCATTATCTTCGATCGAATCATTCGATT[A/G]GGCTTCGCCATTAAATACATTCATACCAACCATTCCTGCACATAGTTTAAAGATTTCTTT	Gh_A01G0771	intron	A	G					A01	16338403	16389460	-	AT5G08450	0	Q6R8G3	PHO17_ARATH Phosphate transporter PHO1 homolog 7 OS=Arabidopsis thaliana GN=PHO1-H7 PE=2 SV=1
900	TM900	A1	16377444	1	TGCCTGCCATTCAGGCACCATTTGAGAAGCAAATTCCTTGCCAAACTTCATCTCCAGACA[A/G]TGGCCGCTAAAGCAGATATGGATGAGAAAGATGGAACAAATAGTAATTTGGGGTGAAGCA	Gh_A01G0771	intron	A	G					A01	16338403	16389460	-	AT5G08450	0	Q6R8G3	PHO17_ARATH Phosphate transporter PHO1 homolog 7 OS=Arabidopsis thaliana GN=PHO1-H7 PE=2 SV=1
901	TM901	A1	16383488	1	ATAATTTATTCCTGACTAAAAAAGGCTCGCACGAATACACATGCATGTGGTTCGAACTGT[C/T]GACATAGTAAATGGTCATGTTTCCAAACAGTTGTAAACCTATTTCCCAATTCTAACATAA	Gh_A01G0771	intron	C	T					A01	16338403	16389460	-	AT5G08450	0	Q6R8G3	PHO17_ARATH Phosphate transporter PHO1 homolog 7 OS=Arabidopsis thaliana GN=PHO1-H7 PE=2 SV=1
902	TM902	A1	16387190	1	ATTAATGTAGAACAACCTAATATACATCCTAATACAGCCTGCAAATCAAAAATAGAGAAA[A/T]TTTCATCGGTTCCAGTCTTCATCTACCAAATCAACGTGCAAGGTCAAGCCTAAACTACCA	Gh_A01G0771	intron	A	T					A01	16338403	16389460	-	AT5G08450	0	Q6R8G3	PHO17_ARATH Phosphate transporter PHO1 homolog 7 OS=Arabidopsis thaliana GN=PHO1-H7 PE=2 SV=1
903	TM903	A1	16405455	0.965	TGATCCCTCTTTTAAACCACGAGAAAGTGAAGATACTGCAGATGAACAGCTTAAAAGCAA[A/G]GAAAAGATCAAGATATGTGGTGAGGCCATGAATGAAATTTTTGTAAGATGTGAGTTTTCA	Gh_A01G0773	utr	A	G					A01	16403052	16404839	-	AT1G11300	protein serine/threonine kinases;protein kinases;ATP binding;sugar binding;kinases;carbohydrate binding	P17801	KPRO_MAIZE Putative receptor protein kinase ZmPK1 OS=Zea mays GN=PK1 PE=2 SV=2
904	TM904	A1	16446835	0.996	AGTCTTATAGCTCTATATGTTACAATAGTTGAACAATAAGGATGTTAAAAGATGCAAGAA[C/T]AGTAGGGTGTGAGAAGAATGCCCTGCATGGGGGTCCATATAGTTGAAACATTAGTAAACT			C	T
905	TM905	A1	16483572	0.965	TATATCTCATTCTACTGTGACTGACTACATGTCCATCAATATAGTTTAGCCTAATACTGA[C/A]GATTTATTTGTTCCATCAGTAAGACAAGCCTACATTGATGGATTTTGTCGATCAATATAG			C	A
906	TM906	A1	16497425	1	CAGAATTCTTTCTTGGAGGAAATACCGTCTGAGCTAGAAATGGCAAGACAAGAATTTGAA[T/C]GAGAAAAGGCCAAGATGTCTCGGGACCTTAGTGCTCTTCAAGAGGAAAACTACCAATTGA			T	C
907	TM907	A1	16501662	1	GAATGATATACCCTGGGCAAGATAATTTACAAAGCACGATGTTATTAATTGAAAGGGGTC[G/T]TCAGAATGTCAGTATAAATGTTATTGACAAAGGAAGTGATGCAATTAAGGATGTTTCAAC			G	T
908	TM908	A1	16505837	0.935	TTGAAAAAATTCTTGATTAAGAACGTGGAAGAGTTCATGTGTTGAATATCTAGAGCATTT[G/T]TATCTGTTGAATGCGATCCTCTTCTTTTTATGATACTTTTTTACTATTCTTGGTTAACTT			G	T
909	TM909	A1	16516466	0.935	GTTGCAATCAAGGCAAACATCATAGTGCACCCAAGTTTGAATGATGAAAAGTTCAAAAAA[T/C]GTTTTGTTATTCACCCCATGCATTTGGATCATTAATTTTCAGTTAGAATCATTTAAGGTT			T	C
910	TM910	A1	16519446	1	GAATAAATTGAAACAAATGTTAAAGACTTCTCATCTCGAAGAAATAAAATGTCACACCCA[G/A]TAAGTTATGACATGACATCTTGAGCCTTCGAGAATGAGCTTGCCTCTTATTTAATATTTA	Gh_A01G0777	utr	G	A					A01	16518091	16518560	-	0	0	0	0
911	TM911	A1	16525330	1	ACCTCATCCTGGTTACTCAATTTCATATGCCCCTAATCGATTTATTTCTTCTTTCTCAAG[C/G]CAGCTCGGTTAGTGGAGTGTTACAAGTTTTGACTTGTCACAAAACCTTTTGACGCGAAAT			C	G
912	TM912	A1	16529399	1	GAAACCACCAAATATAAATTCCTATGAAAAAATAATAGTAAATTGAAATATGAAGCAATA[T/G]GGTCAAATCCACATGGGCTAGTTGTCTAATTTTGCCTTTTCTTGTGACTAGAATTACTAT			T	G
913	TM913	A1	16536218	0.965	TTGATAGTAGAAATGTGATAAAATATATGCATGATTTGGTAAGTTTGTATGTTTGCATTT[G/A]AGATGCCATGTATGACATATTGGTTGGATGACTTTGGATTATTGAATTGGTCATTTCATG			G	A
914	TM914	A1	16539968	0.988	GGTGGAAGGAAAGAATCTGATGAACCAAAAATAGTAGAAAGGTTGAGCAATAGAGGGATG[G/T]AAATAAGGTACAGTAAATGCAAGAGATTAGGCCACAATAAGAGGAGTTGCAGAAGAGAAG			G	T
915	TM915	A1	16545319	1	AAATAGTAGTAGTGTTGAAATGTTCCAATTTGGCTGAAACCTCGGACATTCCAAAATAGT[C/G]TGATCATGGTGTTGGTGCAAGTTGATTAGCCCAGCCTACTTAGGCCCTAGTGTCTTGTAT			C	G
916	TM916	A1	16549437	1	TAAGCCTATTAGTCCATGGTATGTGTTAATGTCTTGTGATGTGGTTATGTGATTATGCTT[G/A]TTCACTATGTATGAGAAGTATATGGTACATGTACATGATGAACGCCCCAGGACCATTTGA			G	A
917	TM917	A1	16566970	1	TTAACGCCGCGTATTATTAAACGTGGAGCCAATTTTCAGGTTGCTTCATACGTCCTTCAA[T/G]GGAAACATCCCCTCGCGCGATGTATTCCATGACATAATAATAAAAGCAAAAGTCAATAAA			T	G
918	TM918	A1	16572545	1	TTGGTTGTATTCTAGGCTGTTTTTTGATAATTTTGGAATGTTTTTGTTATGTGTGTAAAG[A/T]GTCGGATCTTTCAAGAGCTATTACAAGCAAGTCTAAAGGCAAGGAAAAGCTCGTTTGAGC			A	T
919	TM919	A1	16599119	0.976	GATACGGGCGTGTATCTCAACCATGTGGATGGAACAGCCTTGAACACGGGTGTGTGCCTT[G/A]GCCGTTTGAAGTCTGCACCTATTTGATGAAAATTAATTTTCCACACGGCCTAGCACATGG			G	A
920	TM920	A1	16614342	0.965	GGTTGTTCGATTATAACTTAAAGTTTTAACAGCCATTGATGGTCCCGAGCTACAATGTGT[C/T]ACATTCGTTATTAGAGCAACTACAATCAATTCACATTTAAAATATACTAATTATATGAAA			C	T
921	TM921	A1	16634678	0.965	TGAGGGTGGCAAAATGGCTTGGAAAATAGCCTTTTATTTGTCCACACAAGTAGACACACA[A/G]GCGTGTGTCTAAGCCATGTATGACACACGGTTAGCCCCATGGGTGTGTGATCCGGCCGTG			A	G
922	TM922	A1	16637363	1	CACCCCCGTCACACTGCCATGTGTCTCACACGGCCTACCACACGTGTAACACCCTAAACC[C/T]GGCCCAAACGTTATGGCCGAATCTGGTGTTCATATCGGAGTGTTTTTCAAAAATAAAGGC			C	T
923	TM923	A1	16642511	1	CAGAGAGAAAAATGCAAAAGAAAAAATGTCCAAAGAGAAACTGATACAAGGAATACTCCC[T/C]CAAAAGAAGTTACAGTCGAAATTCTGAGCAGCTAGAAACCCAATTCGGCACTACCACATC			T	C
924	TM924	A1	16646466	0.976	CTGGTGCGTCGTTTTGCTTCTCTCGGTCGTCGAGCCTGGTCGACCCAACTCTTTTCCTTG[A/C]CCCCTGGCCTCAGTGTGACAGTTATGACTGGACAGATTTAGCAGTCTCTTTTGAGATGTT			A	C
925	TM925	A1	16673134	0.988	GATCGAAATGAATCAAATGCTCCTAACTAGATGTGTAGAAATGTCATGAGCTTTTTTTTT[T/A]AAAAAGGCTTAAGGTATCATCGCTCGTTGTTCATCAGGACATTATCACTGACGTATTACG			T	A
926	TM926	A1	16678527	0.965	GTGTGACCACAACGGTTATGCAATGCAATGTGAGAGGATATATGCATAAAAACTTGAAGC[A/G]ATTAAAGAAAATAGGAATAAAATGATGAAAACCGTATGAAAAACGGGTGAAATGCAATGA			A	G
927	TM927	A1	17008424	0.996	AACACCAGCTGACGAGCTTCAGCATGTCCAGCACTCCTGCCAGGTGCCCCATGCCCTCGT[T/C]TATTACCATTGCCACCTCTACCTTGCCCACGGTCTCTTTTTAGTGGTGGTCTTCCTCGCT			T	C
928	TM928	A1	17013069	1	TTCCCACTCCGGTGTTACTAGGTAGACTTTCTAGCGGTCTCTCTGAAATCATCTTAGCCA[G/A]CTATCCAATTTGATTTTCGAGCTTTTGGATTGATGCTTCTTAATTTTTAAGTACAGTTTC			G	A
929	TM929	A1	17251266	1	TACTGGATATTCTAAGAACCTTCATCATGGGATATATTACTGATGCCAAGTCCCAGACAT[G/T]GTCTTACACTGTCTCTCATATATGCGTGCTGATGCATGTTCCAAACACGTCTTACACTGG			G	T
930	TM930	A1	17314179	1	CTGTGAGTTCTATAATAAGGAAAACCATGAGATTGAAACATGCGATGAATTCAGAGTCCT[A/G]GTACAGGGTCTAATGGACAACAAAGAGCTGGAGTTCTTTGAATTTACTGAGGAGGAAGAT			A	G
931	TM931	A1	17327875	1	ATAAAAGCTCAGTTGCTTCATATGTATTTAAGAAAACTTGATTCAATGAACATCAATCTC[A/C]AATTAGTTATCAGCAACTGCAGGAAACCAGCTCCACCATTATAACTGATCTGGACTCTAG	Gh_A01G0792	intron	A	C					A01	17326861	17337930	-	AT1G16290	0	0	0
932	TM932	A1	17630256	1	TTGAGGGTGACCATTGGCTTAGATTGTAGCCTCTAAAAAGGTCCACACGGATAGACACAC[G/A]GGCGTGTGTCTAAGTTGTGTGTGACACACGGTAAACCCAACAGGCGTGTGGTATGGCCAT			G	A
933	TM933	A1	18164733	0.935	AAACGGTCCTTACTTATCTCATACCCTGCCAATATAAGTTGATAGCGAAAATTACATACC[G/A]CTTTTCCATTTAAAATAAATTCAATATTCCAAACGAAATTATATTAATAAAGATAAAGTT			G	A
934	TM934	A1	18167132	0.935	AGACACGTCTTCTCAAAATTATTTTTTCAGAGACCACTGTAGCAAAAGAGCATCCACGTG[G/A]GAGCTTCTTCCAGTAATTTTGCTGAAAATGAATTCTGCTTGAAGCATTTTTACCACTATT			G	A
935	TM935	A1	18871381	1	AAAGGGTAGACATTTAAGTAAACTTCACCTACCTACACCCATCAGCTATGGCCTAATGGT[T/C]CTTACAGTAGCAGAGTAAATTTGGTAAGCACGTTATTATTATACATATAAAGCGATATGG	Gh_A01G0822	utr	T	C					A01	18867901	18871162	+	AT1G76400	Ribophorin I	Q9SFX3	OST1A_ARATH Dolichyl-diphosphooligosaccharide--protein glycosyltransferase subunit 1A OS=Arabidopsis thaliana GN=OST1A PE=2 SV=1
936	TM936	A1	18937848	0.965	GAAAACATTTAATAAAGACATCACTTATTACACCATAGCCACTTAATCATCCTTAGGACG[G/A]GATTCATCTATAAAAGCTTACACATTTGATGCTGATAAGTGTCGTCGAGTTGTTTCTACT			G	A
937	TM937	A1	18950643	1	CATAATTATGGGTATGAATACCGAGCTTGCTTGCTCTTTGTTTTGCCTTAAGACACTACA[G/T]ATTATCTCCTTCTTAACTAGTAATTGAGTATTCCATCCTCATTCTAAATATAAAATAATT			G	T
938	TM938	A1	18956573	1	AAAATAAAATGATCAGTACCAATGGTGAGGATGTCCCAATTATGCACTTTGATCCACTCA[C/T]GTCGAAATGAATCTAACTGCAAAGTAAAAAACAGATATGAAGATATAACAGATATGAAGA	Gh_A01G0830	exon5	C	T	CGT	CAT	R	H	A01	18955426	18958223	-	AT1G42480	0	Q2L6L1	CNPY1_DANRE Protein canopy-1 OS=Danio rerio GN=cnpy1 PE=1 SV=1
939	TM939	A1	18961931	0.988	GCAAGGTCATTTAACTCAATTTTACTTGCTCAATCCCCAAATCAGCTTGAAATCTTATAT[G/T]TATAGGCTTGAAAATAAATCACCGGTATAAAACCTGCTAGGCATAAGCCTGAATCACACA			G	T
940	TM940	A1	18966820	0.996	TAAAGCGAATAGCTGAGTTAGAGCTGAGCTGAGCTCACGAGTCGCTTTTTTCATTCAGTG[T/C]TGAGTCGCTTTACCAACCTAACACTTTTTTTTTCGATTAAATTTCCATGGGTTTCTAATC	Gh_A01G0831	utr	T	C					A01	18967628	18969367	+	AT5G42350	Galactose oxidase/kelch repeat superfamily protein	Q9FII2	FK117_ARATH F-box/kelch-repeat protein At5g42350 OS=Arabidopsis thaliana GN=At5g42350 PE=2 SV=1
942	TM942	A1	18981727	0.965	TATGTTGTGTTCAACAAGTGAAAAAGAGATCTTAGGATGAATCACAAAGCTCATCATGTG[C/T]CATTATAGATATAATAGATTGAATTGCTGGTGTTTACCAATGTTCACATGAAGTTGTAAA			C	T
943	TM943	A1	18989500	0.988	TAACAAGCTCAGCGAATGCTTAGAAAAACTACCATGCGAATAGTTCATCAAGCATTTACG[G/A]AACAACTATATAACATTAACAGTTCCAACGTTAGTTTCATAATGTACTTACTCGTGCATT			G	A
944	TM944	A1	19037208	0.915	TGGATATATGTGAATTGAGACAACGGGCTCCCCTTGCAAGCACCTCGTGGCATGTGCAAA[C/T]TGAGACCGCGAACTCCCCTTACGAACTCTTGGGCTGTGGGTGGGTGACCTAGACCTTATC			C	T
945	TM945	A1	19039357	0.996	GGAAAGACTATTAATTGAAGGTCAAAGATGAGTATGTATAAGTGAGGATGGCCATCCCTT[A/C]GCACTAAGTCTTGATACGTGTCCTACTCTAGTCTTATCGTGGTTGGCCACTTAGGGAGCA			A	C
946	TM946	A1	19042627	1	TAGCTTATTTGAGGAGAATTGAGCCATCCAAGTGATCCAAAACTAAGCAAAAATACCTTG[C/A]GTATGTGTTGTGTTTTCTACTTCAATAAGAAAGGCAACGCAAAACCAAAGTTGAGAGTTT			C	A
947	TM947	A1	19048174	1	TACCATTTTTGTTCGATCACATATGGGGATAAGGGATATCGCCCTACACTAATATGATCA[C/T]TCAAAGGGAAAAAAACATTTACCTTGCTAGTAGGAGAAGTGTAACACCCCTTACCCGTGT			C	T
948	TM948	A1	19051982	0.988	CCTCAAACTGTCCATCATTGAATCTAGATTCATTTAGTGCCTTGGTGTGTTCAAAGAATT[A/G]GAGGAATTGATGGAGCTAGCATTATCAACAACATTATCAGGACCATTGTTTACACGAGCA			A	G
949	TM949	A1	19060120	1	ATTTAACAGTCCAAGTCCTTTTACAGCCCAAAAGTTAAAACCCAACTAGCCTAAACCCAA[G/A]CCCAAATAGACCCGTTACACCCAGCAGCCCATTTAACCTAGACCTAGCAAACTGGTAGCC			G	A
950	TM950	A1	19066599	0.935	CGTTCCTCATAAGTTTATACTATCATATATATTACCCCCTCTCATTAGTTGTTTCCTTTT[T/A]CCTTTATCTTACTTACACAAGCATGAATCTTACTCAGAATCTTGCCTATGGCGAGGATAT			T	A
951	TM951	A1	19078477	1	GGCACGTTCACCAGCACTGAAGAGATTGGCAGTTTTTTCATCAGCATAGGAAGTGGAATC[A/G]GGGGTCAAGCTACCATCTGGAGAAGCTTTTCCTCTCTGAGAGACAGTCCCTTTTTCCACA	Gh_A01G0834	exon11	A	G	CCT	CCC	P	P	A01	19077161	19085929	-	AT1G20760	Calcium-binding EF hand family protein	Q9HGL2	YHLA_SCHPO Uncharacterized calcium-binding protein C800.10c OS=Schizosaccharomyces pombe (strain 972 / ATCC 24843) GN=SPBC800.10c PE=4 SV=1
954	TM954	A1	19088070	1	CTAACTTTGTATGTTAGCGAGTGTTGGAAGTACAAGAATGGGTGTAATTAGAGAGTTAGG[C/A]TTACGCTTAGGAAGAGGACACAAGCTTCAGAGATCCAAAAATGGAACGGAACCCATGCAC			C	A
955	TM955	A1	19090749	1	TGTCTTCAGTATCGTGGTCACATCGTGTACACACACTACTTTGCCCAATTCCTCTATTGA[T/C]TCGTTCTGAATTAGTAAAAAGCCTCTATTTGGCCACAAGTTAAAGAAAAAGACGAACTCT			T	C
956	TM956	A1	19098709	1	AATACAAAAAACTTAAGGTTGAGATGCTCATGAACTCCATGGATTCTGACTTAGAGGATG[C/A]GAAATCCTCGACATTTTCGATTAAAACGTTAGACCTCGCAAATGACACCACCACAGTAAC			C	A
957	TM957	A1	19104891	1	AAAATGAAAGAGGTCCTGCATTTGTTGCTGACGGGATTTAGTCGAACAAGTAATCCTATT[G/A]ACCTCATCACAGAAAGAATTTAGCCTGGATTGGTAATCTTGTTATAAGTCCTCTCGAGCA			G	A
958	TM958	A1	19167032	0.732	CCCTCTGGTTTTAATTATCAAAAGTACATGCCTGTTAAAATTTTCAGCCTTTTTTAGGCA[C/T]GTTGTAAATATATTATTAGAAGACACAACTCCTATAGCACATTTTTGACAGCCGCAAATT	Gh_A01G0838	intron	C	T					A01	19162700	19189261	+	AT1G20696	high mobility group B3	P93047	HMGB3_ARATH High mobility group B protein 3 OS=Arabidopsis thaliana GN=HMGB3 PE=1 SV=1
959	TM959	A1	19184566	0.858	TTCATTGAAGTACTTTTATAAACAATAGGCCTTTATATAACCATTTTAAAAGGTTTAATT[A/C]TTATGTAAACAATCTTTAAAAGGTTAAGCCCTAATTTGAAGATTTAGCCGAGATTATTTT	Gh_A01G0838	intron	A	C					A01	19162700	19189261	+	AT1G20696	high mobility group B3	P93047	HMGB3_ARATH High mobility group B protein 3 OS=Arabidopsis thaliana GN=HMGB3 PE=1 SV=1
960	TM960	A1	19189335	0.988	GGATAGCATAATCAATGTAGGCTGTGATAGTGTTTGATCAAAACCTTATGTTAATGCTTT[A/C]GATGTTTCCATGTTATTCTTTTAGATGCGCATGCCATCTAAGGGAGAAATGTACCTCTGA	Gh_A01G0838	utr	A	C					A01	19162700	19189261	+	AT1G20696	high mobility group B3	P93047	HMGB3_ARATH High mobility group B protein 3 OS=Arabidopsis thaliana GN=HMGB3 PE=1 SV=1
961	TM961	A1	19198377	0.765	CTCGGATGATATTCCTGTTTATTTCTCTTGAAAATAGACTCATTAAAGATTCTAAGCATA[C/T]GAATTATAGCCCATAATTATTTTTATACAATTTTTAATGATTTTCCCAATTCAGAATAGG	Gh_A01G0839	intron	C	T					A01	19191590	19228956	-	AT4G38260	Protein of unknown function (DUF833)	P54797	TNG2_MOUSE Transport and Golgi organization 2 homolog OS=Mus musculus GN=Tango2 PE=2 SV=1
962	TM962	A1	19201775	0.765	ATTTTTTTAAAAAATTGTTTAATAACACGAATTAGAATGAAAATAGAATATTCATTAGCA[G/C]CCTAAATTGATCAATTTAAATAATCAATGTTGATATCTTACATGGGAATGGATATTTAAA	Gh_A01G0839	intron	G	C					A01	19191590	19228956	-	AT4G38260	Protein of unknown function (DUF833)	P54797	TNG2_MOUSE Transport and Golgi organization 2 homolog OS=Mus musculus GN=Tango2 PE=2 SV=1
963	TM963	A1	19210576	1	CAAACGAGCACAGTTGAGCAAATTGCTCAACTTAAAGCAAAGGCAGCATCGACAGAAGTA[G/A]AGGTTCAAAGAAAATATGAAGAACTCCAACTACAACTTAGAGCGGAGGTAGCAACGAAGG	Gh_A01G0839	intron	G	A					A01	19191590	19228956	-	AT4G38260	Protein of unknown function (DUF833)	P54797	TNG2_MOUSE Transport and Golgi organization 2 homolog OS=Mus musculus GN=Tango2 PE=2 SV=1
964	TM964	A1	19224534	0.935	CAGTGCATTAGGGTTTAGATCCCCTTTTTTTTTTGAAAATTTTTAAGTTTCTGAGCTATG[G/A]GATGTTGTATTTTTTTTTGGGTTAGGGTTTTTGTTCTGGGCTTGTAATTGGACTTTTAAT	Gh_A01G0839	intron	G	A					A01	19191590	19228956	-	AT4G38260	Protein of unknown function (DUF833)	P54797	TNG2_MOUSE Transport and Golgi organization 2 homolog OS=Mus musculus GN=Tango2 PE=2 SV=1
965	TM965	A1	19239448	0.935	ATATATGTCTTTATTTTTTAGAGTCATCCACTCTGATGTCCAAGACAAAAAAAATCTCCC[A/C]AATTGGATTTGATAGGTGGCATATTAGTCTTTCAATTGAGTTGCTTATTTTTTATTAGAC			A	C
967	TM967	A1	19247882	0.949	TTTTCCCAACCTTCTGGCTTGATGGGTTGGAACCCTAACCCTGGGGTCCTGTCCTTGGAC[A/G]TTGGGTTAACCCTTGTTCTCCAATCCGCAACGAACGCCGATACCCTCCTTCGAAACTTGG	Gh_A01G0841	exon1	A	G	ATG	ACG	M	T	A01	19247722	19249449	-	AT4G37420	Domain of unknown function (DUF23)	Q6YRM6	Y8219_ORYSJ UPF0392 protein Os08g0121900 OS=Oryza sativa subsp. japonica GN=Os08g0121900 PE=2 SV=1
968	TM968	A1	19253974	0.988	GCTCGTTGTCCATCATAGAGTGATAGGTTTACTTGCCTTTCAAGGCTTTATCTTGTACAA[A/G]ACTAAGGTCCTCAATTGTTTTTCTCGCTCTATGTAATTGGGTTTGTGACTTCATATGCTT			A	G
969	TM969	A1	19259044	1	GCCGCTACCTCCCTCTCTGCTGCCTCCGCTCTAAGTTGTTGCTGGAGTTCTTCATATTTT[T/C]TTTGAACCTCAGCAATTTGCTCAACCATGTTCGCTTGCATCTGAGCTATCTGGTCTCTTA			T	C
970	TM970	A1	19270186	1	TCGTGATATAATGCCCAAATAGCTTGCTAAAAGTCGAGCTTCAGATCTAAATCCAACAGG[T/C]TGACCATAACTATTTCTACTTATTTTGACACGCTCGACAGGATTTAAGTCGTATAAATCT			T	C
971	TM971	A1	19323458	0.988	AACGCAGCTAAATGTGCCGCTAAAAGCCTGTTTTGCTGTAGTGTTGTAAGATCGAATAAT[G/T]GTCAAATTAATTAGTCCATTGAATTTTAGTTCAATCGATTAAATCTTTGATTCAACAATA			G	T
972	TM972	A1	19329518	0.732	TAGTCTGAACTTGTTGCTATAGTTCTTTTTAAACCCATAGAATATCTTTAGTTTTTAATA[T/A]GTAACAATTAATAGTGGAATTATATTCCATTACTAGATTCTGATGTCCTTATTTCTTATT	Gh_A01G0842	intron	T	A					A01	19326732	19329911	+	AT1G20650	Protein kinase superfamily protein	Q9SFT7	Y3707_ARATH Serine/threonine-protein kinase At3g07070 OS=Arabidopsis thaliana GN=At3g07070 PE=2 SV=1
973	TM973	A1	19333224	0.935	TAAGAAAAGCTTCGACTGATTCTGGTTACAAAAATATTCAGAGTGTGAGTTTCAGAGTTT[A/T]AAAAAACCCCTTTTTAAAGAAGTTTCTTCCCTCTATGTTCTGACGATTCAAATAAATGAG			A	T
974	TM974	A1	19337011	1	ATAAGTATGCTCTATAACTTGGCATATGTTGGCCACCATTCTTGACCTGAAACAGTGGCG[G/A]GAATCGATTTCCTCATGACTTTGGTGGCCAGTTGCTTATATGGTGCCTTTCCTCTCGTTG			G	A
975	TM975	A1	19340225	0.935	ATTCACTTTTGACGTTCATGGTGTGATTTACCTAAATTTTGAGTTAATCACTGACCATAC[A/T]TATGCAACTCATGTACTTTGATATAAGTGAAGGCTTATGCTTTAAAGATAATCGAGCCCA			A	T
976	TM976	A1	19345451	1	CGTCCTATCTCTAGGATTGTATTCAACTCCGCTTAATTATGAATGATCTACTCTTAAACA[A/G]GGACTTTTGCCTCACTGAATGAGCACATCAAAAACCTGGATTAGTATCCTGAAATATTAA			A	G
977	TM977	A1	19348963	0.965	GCATACCCTTTTAAGAGTGCAATATATAGTACTACTACACCTAATATTTATCAGTAAACA[G/A]CCATACTCTTTAACAAGTATCCTATGTAAACAGTTATGTGGTATGCTCCAAAAATATACC			G	A
978	TM978	A1	19351875	0.976	AGTCCATCACAGTGACGCTGGTGGATCCTAATAAAGTGGGAGAGGGAGTCTGGGATTCTT[T/C]CATTCCTTTCTCTTTGTATTCAATTTTACGAAGGTTGATTTATGTTCCTATCTCTCTTAC			T	C
979	TM979	A1	19394432	1	CCTCTCTTACAAAAAGACAGTAGACAGTAGGCCTAGGACAAGAGAAAGAGGTAAACATCG[G/A]AGTCTGCATTACCACAAAGGCAAAGCGAGACGTTATTGAGTCACTTCCGAGAATTTAAAA			G	A
980	TM980	A1	19540553	0.988	TTATCTTAATGGATCTATTTTCATATGGAAGAAACAAAATAGGTAAAATAGTTATATTTT[A/C]TGAGATATTTACGTTTTGGTGAAACAGGGTCAGAGTAATTTCTGGATTCCCTATTCTGAC			A	C
981	TM981	A1	19583204	1	TTGGATGACCCCAAGGAAAGTAATGACACCGAAGTGCCTATGTTTGAGCGACATGTTGAA[T/G]CTATGTTGGAGGAGATTGACCGGATGGTATGGCATGCCTCCCTTTACTAACTGATACATC	Gh_A01G0848	exon5	T	G	TCT	GCT	S	A	A01	19582268	19584633	+	AT1G76310	CYCLIN B2;4	Q9SFW6	CCB24_ARATH Cyclin-B2-4 OS=Arabidopsis thaliana GN=CYCB2-4 PE=2 SV=2
982	TM982	A1	19616841	1	AACTTTTATTTTTTTTCTAGAAAAGTTAGTTTTTTTAAGGGTAAATTACACCAACAGTCA[T/C]CCAACTTTGGGGTAGCTGACAAAACAGTCACCTAGGTTTTATTTCAGTCACTCAACTTTC			T	C
984	TM984	A1	19688243	1	GACTATCATTCGAGGAAAGCTAACGTGGTTGCTGATGCTTTAAGCCGAAATCTCTATTTG[T/C]GCTTCGATTGTTGAATGCTCAACTCAAATTAGAACTTGACAGGTCTATTTTGGTAGAGCT			T	C
985	TM985	A1	19708610	1	ACATATCGTCGTCCCTATTAGACCTTTCCCCCCATAGATCTCCGTTTCTATCAACTTGAT[A/C]TACATCCTCCACTTCTCACACCTATGTCAGAATCCTCGTTTCTTGTTGACCCTTCCCACT			A	C
987	TM987	A1	19766345	1	CTTTCAGTCATCTCAAATAGAGTAATCCACTTTCAAACTCAATGGACTCCGTTCTAAGTT[T/G]CCAAACGCAAGGAACTCTTGGTTCTACTCTAGCATAACCATGTACTGCTCCTCCAAGAAC			T	G
988	TM988	A1	19771172	0.976	TGATCGCCGAAGCCGCCCGCAACGTGAATGTCAAGGTCCACAAAAATATACCCCTAGAAC[C/T]ACACTATCAAACCATCAATTTTAGGGGGTTTTGTAATATAAATAACTTCATTTTTAAGTA			C	T
989	TM989	A1	19777090	0.976	TGACTCAAAGGCCAACCACATTGTGGGATTAGTGGAATGCCATACAATCTCGATCCGCTG[A/C]GTGCGGGTGTATGTATGTATGTATATATCTATATCTGCAAATCAGCTAACTCCGTGTTCC	Gh_A01G0855	utr	A	C					A01	19775551	19776684	-	AT3G26040	HXXXD-type acyl-transferase family protein	Q70PR7	VINSY_RAUSE Vinorine synthase OS=Rauvolfia serpentina GN=ACT PE=1 SV=2
990	TM990	A1	19787988	1	TTATTTGAGCCCTGAAGGCCCAAAATGCATGTTAAAAACAAATCGGGACTAATTCGGAAA[T/C]TCAAAGAATTTTTTTCGAAAAATAATCAAATTTTGAAAGCTGCAGGGTTCACACAGCCGT			T	C
991	TM991	A1	19793965	0.965	TCTAAGAAGTAATAGGTGTAACATTTTCATTCTTCGGACAATCTCTAACAAAATGTTTTG[T/G]AGATTCACAACGAAAACAACCTCGAGTTAATTTCTAGCATTAAACGTGGTACTTTTTTCC			T	G
992	TM992	A1	19824685	0.988	CTTCTTAAGCTAAATAAGAAAAAAAATCATAATTATCAAACTATTTATCTATTAAAATTA[T/G]ATCATGCATGCCCTAATGCAAAGACGTAAATTCCCTCAACATCAAACTTAGAGTTTTTCA			T	G
993	TM993	A1	19829481	1	TCCTGGATCCAACTCCTCAATCCTTATCCTCTTCGGGATCTTTTTCCTTATCTGGATCTT[C/T]CTCCTTAGGATCTTTTTTTTCATTCTCAGTATTGCATTGTCCCGAACTGAGTGGAAATTG			C	T
994	TM994	A1	19837129	0.988	AATTTTAGGGCAGCTCCGTGATAATTGGTTTAGAAGCCACTTCCAAACAAATCAACTTCT[T/C]TAAAATTACTTAATAGGCATCCACCTTTTGGATGGCTTTCTCTGTTGGTGGTTTTGGATT			T	C
995	TM995	A1	19841936	0.988	CCTAATTCTTTTGTTAATCACTCCCATATCCACTTGTTCATCTCTCTAAGGATTTAGCCA[C/T]TCATCGTCTCAAAAACCATCTTTTCTAGAATTAAATTAATCATGTAAGAACATAAATTAA			C	T
996	TM996	A1	19862337	0.965	TCAAAATGTAAAAATGTGAGGGCTAGTTTGTAAAATGCCCTAAATGTGTGTTTGTGGATT[T/G]TTTTGAATGAATGTGTGATTAAATAAGTTAAATTTGAATTTATTTAGATTGGGAACTAAA			T	G
997	TM997	A1	19869466	0.965	TACCTTAGTTACAAAAGTTACAATAAATGAATCAATTCAATGAGCAAGGCATACATGAAA[A/T]ACCATGACGATTGAGCTTTATAGTGTGTAATCTCAGGCATAAAATCACTGAGGCCACTTC	Gh_A01G0859	intron	A	T					A01	19868885	19873146	-	AT1G42430	0	0	0
998	TM998	A1	19889992	1	CTTGGTTACATCGAATTTGACTTCAATTGGGTTTTCTTTTGAAAAGATGAAGTTTTAGGC[C/G]CAGCCTACACATTCTCATCGTTTTGACTTTTCCAACTTAAGATTCACACGTGCCTTGTTT	Gh_A01G0860	intron	C	G					A01	19889441	19891019	+	AT1G76250	0	0	0
999	TM999	A1	19933273	0.988	ACACCGCACTCCCGTCCTTTTGGTTCGACCAATGGTAAAAAGTTAAATCATCATCATCAT[T/G]CACGCACAAAAACAACAAAAAATTAAATGCATCATGATTTCCCTTTATGGTTTATTTTCA	Gh_A01G0863	intron	T	G					A01	19933061	19938146	+	AT4G35240	Protein of unknown function (DUF630 and DUF632)	0	0
1000	TM1000	A1	19948549	0.976	GCGGTGCTATTATCGTTTTAATCAGGATTATGGCGGCCCCTCTGCTCCGACTCTGACGTT[C/T]TCTGGTTGTGTAGGTCACAGATCTCGCTAGGGAGGTTCTGGTGAAGGCTGGTGCCCACCG			C	T
1001	TM1001	A1	19984257	0.935	AGAAATTTTATAAGTATTCAATAAATAATAATTCACTGACTTACTAGCCGGAATTGTGGT[A/C]TCGAAACCACCGTTCTCGACACCATTAAAAAATATGATGTTACAAGTATTCACATATTTA			A	C
1002	TM1002	A1	20026716	0.996	GAACACGGGCGTGGGAAATTGTCAGACGCGCCCAAATTCAAAATTCGTGAATCACACGGG[C/T]TGAAATTGGGGAACACGGGCGTATTACCTGGCCGATTGCCCCAAAATCTATAAATAGGAT			C	T
1004	TM1004	A1	20064971	0.988	AGGCACCCTCCCTGGACTTGGATGGTTAGAGGGAAAATTCAAATCTAAAGAAAGTGGTTA[G/A]AGAGATGAACAAAACCTATTGTCATATATTGTTCGTGAGGAAGGTTTTCGGCTCTTCACT	Gh_A01G0869	utr	G	A					A01	20065297	20067330	-	AT1G76200	0	Q8LDK3	NDUB2_ARATH NADH dehydrogenase [ubiquinone] 1 beta subcomplex subunit 2 OS=Arabidopsis thaliana GN=At1g76200 PE=3 SV=1
1005	TM1005	A1	20069025	1	AACGTGTCTAAGCCTGCTCCACCGATGTGTTAGAAATGATTCCTTGCAATGGATGTAAAG[C/T]TAAGTAGATTGCTTCCACAGTCTAACTACTTAATTGATTAATTTCTTTACCACCACTATT			C	T
1006	TM1006	A1	20077493	0.988	TACTATGTGTTATTTGTCTATGTTTTATAGATTATCGAAGCTAGCTTGGACTCGGGGATC[A/G]TCGGGAAACGTCATTACACTATTGAACATTTTGTTGGTACTTTTGAAGCTTAGTATATAT			A	G
1008	TM1008	A1	20106100	0.935	CTCAAAATTATTTTTTCAAATACTACTGTAGCAAAATAGCATCCATGTGGGAGCTTTTTC[T/C]TGTAATTTTACTGACAGTGCATCATTCTTGAAGCGTTTTTGACACTATTTATTCAGAAAC			T	C
1009	TM1009	A1	20114084	0.996	AAAAGGAGAAGGGAAAGAAAGAACAGGACAGTGCAGTCCCAGTGGAGAAGTGCGATGAGG[T/C]AGCAACAGTTCACCACTCAGAGACGCCGGAAAAGAAGGGTTTCATGGATAAGATCAAAGA	Gh_A01G0871	exon2	T	C	GTA	GCA	V	A	A01	20113654	20114343	+	AT1G20440	cold-regulated 47	P42759	ERD10_ARATH Dehydrin ERD10 OS=Arabidopsis thaliana GN=ERD10 PE=1 SV=1
1010	TM1010	A1	20126833	0.988	TTTTATCCCATGCTTAGCACATTTATGGATGGTTTCTCCTTAGATTTGGTGAATTCGATG[A/C]TCCTAATTCTTTAATTTCATGTTTTATACTTAGGTGAGCATAGGAGAGTAAAAAGAGCAA			A	C
1011	TM1011	A1	20134692	1	TAGAGGAGTCTTTCCATTGATGAAGCTGTCGCATAATTTCAGAGGTTGTGCGTTGGTTGT[T/G]TGTTGGCTCTAGAGGCAATTATACTGTGAGGAATGTCTTCAGATTTTGCCTAGAGGATAT			T	G
1012	TM1012	A1	20145704	1	TTTGAACTCCCCCCAACTCCTCAGAGTTTCGGCTAAACTAGGACACTCCCACGAAACTAG[T/C]ATCAAAACAAAACACCTTTGCGCATAGCAGGACTCGAACTCAAGACCTTCAGTAACAATG			T	C
1013	TM1013	A1	20150520	1	CCTCCGCCGCGGCCTCTTGTACCCCTTCCAAGAGTACTTCTGGTGCTTATTATCGAATTG[C/T]ATTTTACCTGTATTAACAATTTTATGTATCAATTTACAATTTCAGTGTTTATTAACAGAT			C	T
1014	TM1014	A1	20160063	1	TTTCGTCTATTTTAGCCTTATGCCTAGCTCACATGGGACTACAATTTCATTAGAGCGAAT[G/A]GTCTTATTATACTCGATTTTAACTGGAAAAACCATTGATATGGGAAAAATCATCATGAGA			G	A
1015	TM1015	A1	20170734	0.976	GGCATTTCCTGGCCCGAGGAAAGATTAAGATCTAGTGAAGGGTACGGCCTTCGGTAAACT[G/A]CATTGTCGAGGTTTTCGGGTTTGTCAATGAACTAAGTGGTGAACAAATCTGCCTCATCAT			G	A
1016	TM1016	A1	20173984	0.988	AATGATGATTTGGTGTGTTTATGCTTTGAATGTTATGTTCAGTTTGGTGCACTTCAATGC[T/C]TGACTTAGTTATGTTGTTTTGATCACTTTCAAATGGTTGTATATAAGGTTCTTTTGGTAT			T	C
1017	TM1017	A1	20179506	0.988	CGGAGAGACATTGACTTGGAAGGTATCAATCAAACACATATCGTTCTCATCCCAAAGGTT[C/A]GTAAACTAAGTACTATCATGCAATTTCAACCTATTAGTTTCTGTAATGTGTATACAAAAT			C	A
1019	TM1019	A1	20185254	0.965	AAACAAGCCATTATTGTTGTGTAAGAACTGTTCAGCTTAGTAATCAACCACTATAAGGTG[C/A]CTGGCCATCGTTAAAGTGATCTTTGAGTCCCAATTTAATGAAAATTCAGTGACATAAATT	Gh_A01G0872	intron	C	A					A01	20184084	20187069	-	AT5G42250	Zinc-binding alcohol dehydrogenase family protein	Q9FH04	ADHL7_ARATH Alcohol dehydrogenase-like 7 OS=Arabidopsis thaliana GN=At5g42250 PE=2 SV=1
1020	TM1020	A1	20195545	1	AGTAACTTCTTTCGACATCCTAACGGTGCCTTCGCAACCAAAGCTTAGATACCACTTTCA[C/T]GGGGCTAAAATTTTCATTTTGCATTCCGTGTGGCCTTAGGCGATCCTTTCAATGCAAACA			C	T
1021	TM1021	A1	20204232	0.965	CAGTAATTCTGCCAAAATACAATTCCTTTATCACAAATCAAACTCACCTCAATGCACATG[C/T]ATAAATAAACTAACACATATATTTCATAAATAGATGTCATGCTTGTTTTTCATATGTAAT			C	T
1022	TM1022	A1	20208761	0.988	GATCTAAGAACAAAGAGGTTTCGCTATTTAAATCTCTGGTTGGGGTTTAAAGCATGTATG[T/C]GAGTGAAAGCATGTTTAAAGTATGGCCACTCACCTTAGCCCAAAGAGCCATCTCCACAAC			T	C
1023	TM1023	A1	20220916	0.988	GCAACTTAGGCTTTAACTGGAGAATCAAAATTAATGGCCTTTCCTAACATAGGTTTGGCC[A/C]TTAACAAACCTTGAATATGTATGTATCAGGTCTGACTATCTTGGCTTGTTTGAATGAAAT			A	C
1024	TM1024	A1	20233696	1	GATGACCTCTTTCTCCCATCACTCTAACTTGAACTAATATACATTGCAGTAAATTTGAGA[G/A]AGAATTCAATGCTGAGCTTCAGACCCTGAGACCAATTTTGAGCAGCAGCTCCCAAGCGGA			G	A
1025	TM1025	A1	20239615	1	TGCCCCCTAAATCTGGATGATAAGAACTATCTCCAGAGTGTAGTTTCGGCTCTGGCTCTG[A/G]TGCATGATGCGAATCTGAAAACGGTTGCCCAATTCGTATCGTATACGGAGGGACTACCAT			A	G
1027	TM1027	A1	20250387	1	GGAGCGATGATCGTGGGATGTCAGTAGGAAAAGTGTAAAATTCAGTGAGCTGGTAAGGTT[T/C]TAAGTCCTTCGTGGTTGTAAGATTTAAAAAATAAAGTTAAGAGTTTTCAGAACCATTTTA			T	C
1028	TM1028	A1	20264615	1	TATTCTTAAGGTTTTCATACATAACATAGTCATTTACGTATGACTAGAAACACTTACCGC[A/G]TTTTCTTACCAATTTGGGCCCGTTGGTCCATTATCCCGTTTTTGGCCCATTAAGCCCAAA			A	G
1030	TM1030	A1	20276296	1	CTTGTCAGTCTTTGCAGATTTTGATTTCTTTAGTGTAGGAATTTCAACAGCTGGTTGATT[C/T]TTCTCAACGGGCTTATCTTTGACATCAATCAATCGGGGTTCTAGAGTTTTATCAGTTCGA			C	T
1031	TM1031	A1	20282791	1	ACTGCAACTTCAGGAAAACGAGATCTGTAGGATTCGCCAATGTTACTACTCCGTCTTCTA[T/A]AGACATTATTTGTAGAATTGGTTTCCTGTATCTGTGTATGCCAAATAATTAGGGTGCCAT			T	A
1032	TM1032	A1	20293622	0.996	GAAAGCGTAGTTTCTCACTCCCACTTAGAGGGTGTGACCACAGCGGTCATGCAATGAAAT[A/G]CAGTATTATTCTACGAGACCCGAACTATAACAACCATACAAACAAATGCATTTGAAAGAC			A	G
1033	TM1033	A1	20296663	1	TACAGAGGCACGGAGCTGCTGTCCGGTTGCTGTTGCGGCGCAGGAAGGAGGAGTGACCTA[G/A]GGTTACTAAAGTTGTTTCAGCTTTTGGGCTGTTTTAGGCCTTGAAGCTTTGGACTGTTTT			G	A
1034	TM1034	A1	20308393	1	TCGTAAGGGATGTGAGGCATTCTTGGCCTACGTGAGTGTTTTCGCTTCTGGGGACTCTAA[C/T]GTAAAAGATACCCGCACGGTAAGGGATTTTTCAGATGTCTTTTTTGAGGAGCTACTAGGT			C	T
1035	TM1035	A1	20311520	1	TAACAGAATAGGCCTACTGGTCTGGTGGATATGTGGAGTGCTGGTGAGGAGGAGGTCCTG[C/T]GTTTGAATCTTAGCATGGGCATTATTTTTGCTCGTTTGTCCGAGAGAGTTTGAGTTGGAC			C	T
1037	TM1037	A1	20322085	1	AACGAGTGAAAATTGCAAATTCAGAGCAATTTTCAAAAGCCACATGGGTTGGACCCTCCC[A/G]CACGGACTGGACACATGGCCGTGTGAGCCATACTGGCTGCCATACGACCATGTGCCAGAA			A	G
1038	TM1038	A1	20325056	1	TGGTGGGCTGGCGATGGTACTCGGATTAGATTGTGGGACGATTGGTGGGTGGGTATGACG[C/G]CGCTAAATAAAACAATATGCTATGGTCTCTTCAATTGTGGGTGCTGATGGAATTTGGACC			C	G
1039	TM1039	A1	20335319	1	TCATATTTAGTATTTAGTATTATGTATATAATTAATATTTTTATCACGTTCATATAGTTT[T/C]AGTGGACACCATACAAGGATTTAACAATTCAGGCAGTAATTCCGGATGAATTCTTTCAAA			T	C
1040	TM1040	A1	20341777	1	TGACATTATGCATGTGGACTAGAGGTAAGTACACCCTGAATCGTGGATCTTCTTCTTCTT[C/G]TTCATCTAAACCCTCTTTACCGTCTTCAGGTTCCATTGGAACAGGCTCTTATTCAGAAAA			C	G
1041	TM1041	A1	20345805	0.935	GGAAAACCACCTTTTCATCCATGTTTGACATCAGACCAGATCAGATATTTGCTAATAGAA[G/A]TCTGATTTATAACCATATTACAAAGCTGAATATTTGAATTAAATGGAAGTTTCCAACAAA	Gh_A01G0874	intron	G	A					A01	20344340	20348860	-	AT1G76140	Prolyl oligopeptidase family protein	P48147	PPCE_HUMAN Prolyl endopeptidase OS=Homo sapiens GN=PREP PE=1 SV=2
1042	TM1042	A1	20349791	0.935	ATTCTTGAGTTAGAGCTTTGTTTTTGGAGTTTGAGTTTGTAAATTTAGTACATTTAGCAA[C/T]ATATTATACTCTCTTTTGTTTACTCGTTTAATGATAAGCCGAAGCCTCCTTTGTTCGTGA	Gh_A01G0874	utr	C	T					A01	20344340	20348860	-	AT1G76140	Prolyl oligopeptidase family protein	P48147	PPCE_HUMAN Prolyl endopeptidase OS=Homo sapiens GN=PREP PE=1 SV=2
1043	TM1043	A1	20411674	0.965	AATAACTATCTTTTTATTATCTAGCCTAAGAATAAAAGGGTTTATTTTAATTAACTAATT[A/T]TTCAAACTAAGAACGCACAAAGAAAAGAATTGGGGAATTGCTTTTGGGAGAACCGATTGA			A	T
1044	TM1044	A1	20418621	0.988	GTGTACGCCTAAAGGCTAGGAAAGAGGGCTGTTATTTCTTTAATTTTTCCCATCCTTTTT[T/G]AGCAATATATTGAGTTCTTGGACCCTTCCTAATCAACCTTTGATCATGTGTAACTTAGGA			T	G
1045	TM1045	A1	20420846	0.988	TATTCGAAGAGGCACTCTGTGTTATTCTGGTGTGTTTTGGATGGATTATATTATTCTGGT[G/A]TGTTTGGGAGGATTACATTATACTGGTGTGTTTTGGTTGGACATTTTTGGTGTGTTTGGA			G	A
1046	TM1046	A1	20424767	1	AACCAGATCACGTTACAAAATCGAATTAGCACAGTGCTTAAGCAAACTAGGCGTACTAAA[C/A]TTTTGGCGATAACTCTCAACAGGCTTACTCTTTGCTTGTCACACTCTCTTCTTAAATAGA			C	A
1047	TM1047	A1	20427472	0.988	TATCATGGATGGATGCATGAAATGGGACCTAATAACTTGAGAGTGGATGTAGCATATATT[T/G]GTATATGGTTCTAATATGGCCTAAGTGTAAAGTGTAAAACGTGCTATGTTAATCCCTAAT			T	G
1048	TM1048	A1	20438218	0.996	AGGCCTTCGAGATACCCTGGGAATGCTAGTGGCAGTCGAGTTGTGACGAAAGACACTACA[T/A]AATCAGAGGTTCAAGCCTCGGCAAGAGCGTACTCGATACGTGCTTGAGAGGAAGCCTCTG			T	A
1049	TM1049	A1	20443171	1	AACATACACGAGCCATGTTCAAGCAACAACAAAGGACCTATCTATGAAGAACGAAGGCTA[G/C]AAATTGAGGAACTAGATGAATTGCAGACACATAAACCGAAGACACACGATACACCAAAAC			G	C
1050	TM1050	A1	20449055	0.965	TGGGGGAGAAATGTAACATCGCGAATGTCAGAATAGTGGTTTTAGAACCACAAATCTGAT[G/A]TTAAAATAATTATTTTATGATCATTATTAGGTCTAGGATATGAGAATAAGCATGTTTTAA			G	A
1052	TM1052	A1	20456114	1	GGTGTGGGTCACTGCATTGACTAGATCACGCCTGAACAAGTTCAGTTGGCTGACGATGTC[C/T]AAGCCTTCTTGACAACCGATCCATGAGAACTCTTTTTTGCGGTCATCAAGCCGACGTACC			C	T
1053	TM1053	A1	20458366	0.935	TCATCAAGACTGAAGATCTCCCTTCAAGTCCATTATGTGTTCTTAATTCTTGTTTTGATA[G/T]TCCAGGATATTGATTCAAGTTAAGCTCTTATTCAGACGAAAAATAGACCTTTTCTAAGAG			G	T
1054	TM1054	A1	20471053	1	AGGACTCAAACTCAAGACCTTCAGTAACAATGCCACACCACTTATCCCTTAGACCAGCAA[G/C]CCGTTTCTGACATAAAATACCCACATTTATTTAAGAACCTACTGACCAGAGATAGGGCTT			G	C
1055	TM1055	A1	20480770	0.988	GGAAAGGAGAGGGGTAAGCTTTATGGCTTAGTAAGCCCGTACGAAAATAATAATAAGCAA[C/T]TTATTAATGTGCTTTTGCCAAATGCTTACAACATGTTCTCATGGTAACACAATCGAAATA			C	T
1056	TM1056	A1	20484381	0.935	ACACATACTGAAAATCAAGAATTTCTTGCTCGATGTAGGCTGAACCAGATCTAATGTTTT[G/T]ATTAACAATGTTCTCGTCTGTTCCAAACTTTACTAACATGCAATAGATCGTTCAACTTTC			G	T
1057	TM1057	A1	20487476	0.949	GAACTCTTGAATAAGAAAATTGATGGTTTTCTTAGTTCTTCACAGGTTCACCTAGTAATG[C/T]AGTGCGAGCAAGTGGAGGTGGACCAAGCAATTCGGAGTACCAACCTTATGTCCACAACAT			C	T
1059	TM1059	A1	20492401	1	ATCTCGATTCTAACCTTTTCTTTCAGCTTGTGACCACGACTCCTAACCAAAGCCTCATTA[C/T]AACCCTCTAAAGACCTTTTGATTGATGTATCATCTCAATTAATAGTGCTGGAGATTTGAT			C	T
1060	TM1060	A1	20498275	1	CAAGATACAATATCACAATGAAAGTCCCAAAACAACGCTCATAAGAAAAATATGAAAGAT[C/A]TCGATAATTCCTCAAAGCAAAGAAGTCCAGAAGAATACATCAACCCAACCCACTAGAATT			C	A
1061	TM1061	A1	20548587	0.965	CTTTCGATAATTTACTTTGCATATATCGACCGGTTTTAAATGGTTCTGTAAGTTTGTTCT[G/A]CCATTATCATTTGAGCTGCTTCCAAGCTTTCTATTTCTGTTTCCATAGTTAAGTGGTTTG			G	A
1062	TM1062	A1	20557100	1	CAAAAAGAAAAGGGTTTTTTTGTTTCCATGATTGGAGGTGGACAGAATGCCAATAAACTC[A/T]GTAAGAAGCCCTTTGTTAAACCCCGGTGATAACAAGCAGCCTTTGTGATCACCACTACTG			A	T
1063	TM1063	A1	20564459	1	GTCACAAAGTCAAGACAACACTAAGTCAAAAAAGACATCGTTTGAGTTAGTGTGGCTAGA[C/G]GTACAGTTGGAATTCCGAAAGGATCGATTGTCTAATTGGTCTTCCTTGAACACATTGGCG			C	G
1064	TM1064	A1	20573106	0.935	AACTTTGAATTAATATAAGAATGTGAAGATCTAGGATCACTTAAAGCATGAACAGGCTCA[G/T]AATATAATAGAAATATACCTGTTACCACATTATGAGCATCGCCTTCTTCACGAGTTCTGA			G	T
1065	TM1065	A1	20576920	0.935	ATCTATAACTAACATGTCACCCTGCTGCAGTATTAAAAAATCTTGTTTCTTGTCTTCAAT[A/T]TACATCTCTCCAACATATTTCTTTTGAAATTCCTTCTGAAATAGATCTCATGTTATCTGA			A	T
1066	TM1066	A1	20579636	0.988	GAAAATCATAATATAAATGATTGAAGGATATGGAAATGCAAATGTGACTGTGTAACAGCT[A/C]GGTTTTGGGCTTAGTCAAAAAATTGATTTTGAGACCATGAATCCGAAGTCAGAGAAATTA			A	C
1068	TM1068	A1	20599669	1	CGACCTCTTTCTAAAGCATGTTTAAGGTCTCGTTGACCTATGTAAGGGACTCTGTATTGA[T/G]GTATGACCTATAATGCTATGATGATTGTGAAATGAATGTTAAATGTTTCGATATGTCCAG			T	G
1069	TM1069	A1	20605547	0.996	GGAAAGTCGAAAGTTGTCGAGTAGTCGGTTCTGTTCGTTCGAATCCGTACGAGGTAAGTC[A/G]ATATACAAATAAACATGTTTGAATTGAATTATTACTTGCTTATATTATATTTGAATTGTG			A	G
1070	TM1070	A1	20615938	0.976	CTTGGAAGATAGTCTATTTTCGTCCACATGGATAGAGACACGGGCGTGTGTCTCAACCGT[T/A]TGTGACACACGACCTAGCACATGGGCATGTAGTTTAGCTGTGTGTCCCCTGCATCTACAA			T	A
1071	TM1071	A1	20624777	1	TTATTCAGTTTTCGACGCAGAATTGTAAGGAGTTTTTAATAATCTTATAATGGCTTGGAA[G/A]GGATTCAAAAGGATCATGATGGAGATTGATAGTTTGGAAGTGGTCGAGTGTATTTCGAAT			G	A
1072	TM1072	A1	20637498	1	GAGCAATGATCGGTAGAAATAGAATCATGGCACCATACACAATTTCTCATCGATTCCCAA[T/C]AGGTGGAATATAACAAAATACTAGAGAAAAACAGAACCATGCAGATTATAATCCAATCAG			T	C
1073	TM1073	A1	20757446	0.899	ACTTTCTCAAGTCATTTCTAGCTCCAAAAAGGTCTTAAGAAATAACAGTTTGCCTTCTAA[T/A]TTTGAGTTAAAAATAGAGAGATGTTCAAAAAGCACCAACATAATGCTATTTGTCAGTACA	Gh_A01G0882	intron	T	A					A01	20756017	20764183	-	AT4G38510	ATPase, V1 complex, subunit B protein	Q9SZN1	VATB2_ARATH V-type proton ATPase subunit B2 OS=Arabidopsis thaliana GN=VHA-B2 PE=2 SV=1
1074	TM1074	A1	20859792	1	AATTATTAAACTGCCAATACTTTCTCTTTACAATTGTCCCACCCCATGCAATGCAACATG[A/G]CATACTAGTAACAGTACAATACATAAACAGTAGACATGCTTAACATGTATTCAGTCTAAC			A	G
1075	TM1075	A1	20863020	0.965	CATGAATGGTTGTTGATCGTTAGCAAAGAAGACAAATAAGGAATGTGGTTGAAACTGGTA[T/A]GGATATTATAATTTTAGGAATTTTTAAGGTGAGATCAAGATATTTTTCAATAACTAATTT			T	A
1076	TM1076	A1	20885949	1	GTGTATGTTTTCCCTTCTTGTACCTCTATGGTATCGCTCTTGTAACACTCCAAACTCGAC[G/T]TAAACATTATGACTGAATCTTAGAAGTTACATTAAAACCATTGGAAAACATTTACTTGTT			G	T
1077	TM1077	A1	20888543	0.965	TTTATGTCTTGAATGATTCTGAATTTCCCGATGAAGTGTTTCATGATGAGCTTATCTATG[A/C]TTTTGTGATATACATGAGATTTATGTAACTAACTTGTTTGATTGAATGCTTGTGTTTAGG			A	C
1078	TM1078	A1	20893677	0.965	GAGTTCATACGACTTAGTAAATATACTCGGGAATGTATCCAAAAGAATCTATTATGTGTA[A/C]TCGATCTGAAGATGGTTTAAGCAAAGATATCAAACTGTTAGTGGGGATTTTAGAATTAAA			A	C
1079	TM1079	A1	20897653	0.949	AGGGACAAAACAGACCAAATTGAGAAAATGACACGGCCTAAGCCTTGCCACACGGGCAGC[T/A]CACACGCCCGTGTCTTTTGAAGGTGTCGACCAAGGCTTTCACGATTCACACGGCCTGTCT			T	A
1080	TM1080	A1	20903767	0.915	CGAGGAGGATCTTGAGGACATTCCTGATGATGTCCCCCCACAGCACGAAGAGCCTTCTAC[C/T]ACGCCACCTACGGAACGACCAATTCATGCGGCTGCTTCATTGGCACACTTTTCCGACCAA			C	T
1081	TM1081	A1	20908974	1	GTGAACGATGGGTATTGTTCGGTAATGCCTCGTAACCCTATTTCGCTGACGGATATAGGT[T/C]AGGGGTGTTACATTTAATTGGTATCAGAGCTAGGTTTAGTCAATTCTAGGACTAACGTTG			T	C
1082	TM1082	A1	20912260	0.976	GATGGAATATAGGCTAAATGGGCCTAGATGACGAAATCGGCTAAGTAGGGCCCACTAAGT[A/G]TTTTAGGCCCAATAACTCAATTTCGCTAAAAATAGGCCAGACTCACTGTTTGCACACATG			A	G
1083	TM1083	A1	20919193	1	CTCAAAAACCTCCACCCCCACCTATTCCTCAATAAACCCTTGTAGTTCCTCAAGCTATAG[G/A]TCAGATGTGATTGAATTAGCCGCCAGTAGATAAGATTTGGAAACAAAGGGCTGAAGAGTT			G	A
1084	TM1084	A1	20922486	1	TATCACTAAGTTTTACTCAGCGTACAGTTTTGTTTTCTGTACGCAGGTTAGGTACTTCTC[T/C]TTTGATCACTGACTCAGCATCCAACAACAATCCCAACCTCAAATGTGGTGACGTTTACCT			T	C
1085	TM1085	A1	20930241	1	GAGGGTAGATAAATTGTTCAGAGATGTACCTTTGGAGGTTCAAGGAACCATCTTTTTGGC[G/A]GTTTTGATGGAACTTCTTTTTGGAGAATTTGACTTAATACTGGGTATGGATTGGCTGGTG			G	A
1086	TM1086	A1	20944120	1	CAACTTGGTTTGGGTAAATCGTCAAATTTTAGTTTGAATAATGACAAGGTTTTGTGATTT[C/T]GAGGTCGAATTTGTGTGCCTAACGGCCAAGATTTGGGACGATTGATTTTATAGGAGGCAC			C	T
1087	TM1087	A1	20947654	0.965	TGTATATGCTAGGATACATATGTCATGACATAGGATTCTGATATGTGATGTGCAAGTAAG[A/G]CCATGGCTTCGATATATGTGTGCGAGTAAAACCACGTTTAATACATTGGCATCGATATGT			A	G
1088	TM1088	A1	20950126	0.935	AAATACGTTTTTCGTGTTGTCAATTGAAAGTTAATTATGTAAGTTTTGTTGTGAATTTCT[C/T]ATAATCAATGTTTCGTTCTGTCAAAACGGTTTCATCTTAGTTGGGTTGAATTCTCTTAGT			C	T
1089	TM1089	A1	20958006	0.976	TACACGAGTGTGTGTATCAGTCGTGTGAGTCACACGGTCGTGTGACCCTTACAGTGTGAA[A/T]TTTTTTATCTTTTTCCATGAAGTTCTAAATGTTTTCGATTTAGTCCCGAATTATTTCTAA			A	T
1090	TM1090	A1	20962439	0.976	CAAGGCCTTCGCCTCCTGCAGTTCATTCTTTTGTTCCTTCACAGCCTGTGAGGCCGTTTA[T/C]GAATCCCATAGGATATCCTGGTACATTCAAACTTAAGATTTTGGTTCTTTATGTTATGTT	Gh_A01G0887	exon2	T	C	ATG	ACG	M	T	A01	20961142	20964787	+	AT4G35890	winged-helix DNA-binding transcription factor family protein	Q659C4	LAR1B_HUMAN La-related protein 1B OS=Homo sapiens GN=LARP1B PE=1 SV=2
1091	TM1091	A1	20972113	1	TTTTTGGGTGTTGCTGCTTTCTGTACTTGCGTCCATTTCAACGGCATAAGTTAGATTTTC[A/G]ATCACAGTCTTGTATTTTTTAGGGATACGGCATGTGTTCAAATTGCGGATGTTCTTACCA			A	G
1092	TM1092	A1	20977089	0.988	AAGCTGCAAAGCATCAAACTTAGCAAAGCCAAAGCCGCTAGAAATAGAAAAAAGATTAAC[G/A]AAGTAATGATGAACAATAGAGCATATCCCGTTATGATCAGTACATGGCCTCCCATCAGAA			G	A
1093	TM1093	A1	20984084	1	ATGTGTAGGGCTGGAGGGGTATTAAACTCCCTTATCGGTGTGTTGGGTTGGTCAGAGATA[G/A]TGCGTAACGGATGGGGGTAGGAATAGCTGGATATGTTTTTTATCTATTCTGTATCTGAAC			G	A
1094	TM1094	A1	21052439	1	AATGTCTATTTCATTACAGATTCTAGATGATTGCGGATGACCTCTCGGATTCTTGCGTAG[T/C]CCTCTGTCTGGGACAAGCTCGAAAGTTGTCGGAGACACCTCCCACGTAGACAGGTCAGGC			T	C
1095	TM1095	A1	21057704	0.965	CCTTCTAAGGGTTAAGTGTTGCACTTCATTATTTCTAATCATTTCATGACCCTTCCACAA[T/C]ACTTTTTGGAATCTTGCACTTCTCTCATCATCTTATCAACTTTCTCCCTTTGTGCTAAAA			T	C
1096	TM1096	A1	21064975	0.996	CATGTGTCAAGCCGTGTGTTAGGCCATGTAACAGCTTGACTTGCAACCCTTTGAAAGCTA[T/C]AGGGGACACACGGCTGAGACACACGCCCGTGTGGACGAAAATAGGACATTTTACAAGCCA			T	C
1097	TM1097	A1	21069347	0.988	GTGCTTCAGTCAACAGTACTTTCAACTGATTAAATCTTTGCTGATATTTTTCAGACCATT[C/T]AAACTTTACATCTTTCTATAGTAGCCGCGTCATCGGTGTAGCTATAATTGAGCATTCTTT			C	T
1098	TM1098	A1	21086547	1	GTCACTCGGTTGGGGATGATGCACTGTCTCAAGCCATGCTAAGGATATTAAAGAGGGTCG[C/T]TGGACCCAATTCTGGATCTAAGGGTCAACGATCAGTAACTGAGTGACTCTGGTCGAATAA			C	T
1099	TM1099	A1	21094392	0.988	GTGGAATGATATATATATTGGAGGAAGTGTTTTGAAAGGTAGATTATGCCTAATATCTGG[T/C]AGCACAACTGAATTATATCTGATATGTGTCGCATTGGTACAACATGGTGTGTAGGGTTGG			T	C
1100	TM1100	A1	21097679	0.996	CCGTGTCCCTGCCGAGCCCAAGCCTAGTTCTATTCGGAAAAGGGCACTTTTGAGAGTTTT[A/G]AAGCATTTTAAAGCCTATATAAACACCTTAGAAGAGGATTAAAGGGGGACACACAGAGTT			A	G
1101	TM1101	A1	21103690	1	CAGCATTTCGGCTTTTGCCGAATTGAACTAAGAAAGGGTGTTCGATACACACTTGATTCG[C/T]GACGACTGCTACCGAGATCCCTTTCGATGTCCTAAAATTGATTAGTACAGTTCTTATTTA			C	T
1102	TM1102	A1	21108846	0.935	TGAATTGATATAGCATAAGTTGTTTGTTTGTGGAAATAATTATCTATGATGAAAGTTTGA[G/A]ATAGTAGAACTCCCATTTGAACCTTAGGAAATAAATCGGATATTCATACCATGACATTCG			G	A
1103	TM1103	A1	21119301	1	CCAAAAACCTAAACTAGTTTCAGAATAGCCAAAAACCCTAGGGTTTTTGGTACCACTCCT[T/C]GATCACATCACCTGAGGCTCATCGTCCTAAGGCCTAACGCGTCCCTGCCGCCATTTCACC			T	C
1104	TM1104	A1	21127465	1	TCCAAAACCACGAAGATGGGCCTGCAATTAACGGTTGGAAAAGGAGCCTTACCTGGAAGA[G/A]GATTCAAAAAATAACTTCAAGGGAGAGTCAAGGCACCAATGCTGATGGACAAATGAGACC			G	A
1105	TM1105	A1	21162128	1	ATCGTCTTGATCATGTGGATCAAATACTGGTATGTTTCATCTTAGGAATCTATTTGCATA[T/A]ATCTCCTAGTACTGCAACTTTGGCGATGCTATTTTATGGCCTTGACGAACGTATCAGAAT	Gh_A01G0892	intron	T	A					A01	21158413	21170138	+	AT1G75850	VPS35 homolog B	F4I0P8	VP35B_ARATH Vacuolar protein sorting-associated protein 35B OS=Arabidopsis thaliana GN=VPS35B PE=1 SV=1
1106	TM1106	A1	21168115	0.813	TGTCTATTACTTCAGTTAACAACAGACTAACTACTTTAACTAACTTTGGCTATACATAAT[G/A]CACTCATAACAAGCAGTGACATATTAAATGCTTATTACTAAAAATCTAAAGATCATACAT	Gh_A01G0892	intron	G	A					A01	21158413	21170138	+	AT1G75850	VPS35 homolog B	F4I0P8	VP35B_ARATH Vacuolar protein sorting-associated protein 35B OS=Arabidopsis thaliana GN=VPS35B PE=1 SV=1
1107	TM1107	A1	21179876	1	TAGTGAAGGGAGACCGAAAAACCGACTCTACTATAATGCCTTCAACCCCCCTAGTAGTCC[T/C]GTCTAAGATCAATCTTGTTGCCATCTCCCACTTGCCAAATAAATCCGTCCTTAAGCGCGT			T	C
1108	TM1108	A1	21197417	0.949	TATAGGGTGTTACAAATGCGCTAGCTCCCGCTGAAGGGACCGCGCCAGTTGAGAGTGAGC[C/T]CGTGACTGTGGGCCAAGGTGGAGAGGCTAGAAAAGCCTATCTTCGAATGATGGATGCTTG			C	T
1109	TM1109	A1	21217427	0.935	AAAGATATTATCTGGGTTTTTGTAGATCGATTAACGAAATCAACACATTTAATTCCGGTA[T/C]GTACTGACTATTCACTTGATAAATTGGCTAAGTTGTACATATCTGAGATTGTTAGATTGC			T	C
1110	TM1110	A1	21223990	0.996	AGAGTTACACGGGGTCAAACAAGGGCTAAGACACGACCATGTGATTCCATTTCGAATGTC[C/T]ACACAGTCTGTGACACGGGCGTGTCTGTTGGTCGTATGAGACACACGACCGGGCCACACG			C	T
1111	TM1111	A1	21229843	0.976	TTGGTGAGTGTGCAAGACACCATTCAGAGGCATGAAAACTCGAGGCTGGTTGCCATGTTG[C/T]AACATGGAAGTTCAACGTAACATAGTGTGTAGAATGCCAAAATAACCATATTGCCTTTGG			C	T
1112	TM1112	A1	21244263	1	TTAATAATTTTTTCCCCCAATGGTAAAAATCCTAACGCATCCTAAACATTCCCGTAGAAC[T/A]ATGTAAAAATCCTAACACATCCAAACCAAACTAGGGACCAAAACGAAATCATAATGTGCC	Gh_A01G0894	utr	T	A					A01	21244688	21249882	+	AT4G24190	Chaperone protein htpG family protein	P35016	ENPL_CATRO Endoplasmin homolog OS=Catharanthus roseus GN=HSP90 PE=1 SV=1
1113	TM1113	A1	21253788	1	CTTCTTTTGATTCGTCATCTACATGTAGTCTGGTAAATCCCCCTTCAGTTGACACCATGA[C/T]TACGTTGAGGACTGGCCTACAACAAACTCTCTCTTATCCTACTGCTCCTCCACCTGCTTC			C	T
1114	TM1114	A1	21271842	0.877	TCTCCCGAATCGACCCTTAACTCCGACGGGCACTGGCGGTTTAAGTCATTGATGCACCCT[G/A]TTGAGAAGCACATGCCCAACCCACCGCTCGGCTCGACGATCAATGGTAAGTTGTAGCCAT	Gh_A01G0895	exon2	G	A	ACA	ATA	T	I	A01	21271223	21272386	-	AT4G18250	receptor serine/threonine kinase, putative	P83332	TLP1_PRUPE Thaumatin-like protein 1 OS=Prunus persica PE=2 SV=1
1115	TM1115	A1	21297549	1	TCCATATGGGCTGACCACACACCCGTATGAGCCACACGGGCTGGCCATATGCCCATGTGC[T/C]AGCCCGTGTTGATTTCGAATCCTGCTTCTCTTTTACGCTGAAAAACCCAATTTTTAGGGT			T	C
1116	TM1116	A1	21303372	0.965	AGAGAAAAGAACATTTAGCTAGGCTTGGGTAATGTAGAAAATTCATGCATTTCATCATAC[A/G]GTCATTTTGTTCAGGGGTGAAATTTAGACTCGAAAAGAATAATGTGAGGTATTAATGATT			A	G
1117	TM1117	A1	21324935	1	ACAATATAGTCATCGCTCACATATTGACGTCAAATTTGCAATTAGAAGAGTGGTTCGTTG[T/G]ACAACGGTTTAAGAATAAGGTAGACTGTGTGTTTGCCATCAAACAGTACATCAAGTGTTC			T	G
1118	TM1118	A1	21327956	0.988	CTAACCTAATTGGACGAGTTTTCTTAACATTTCCACTAAAGCCTGCCAAAAAAGTACCTT[T/G]ATCTCAGGAATTTTTTTTCATATTTGAAGCATGTTTTGAATATATTCGATAAAAACGCTG			T	G
1119	TM1119	A1	21344836	0.965	CTTAAGGTAGTCTCATTATCTCAGTTAACTAATTATAAGTTGACTCATGACAGGAAAATT[C/T]AAGAAATTCAACCACCACAGAAATATTGTGAAGGAAACCTAGTGGCTTATGCTCTAAGTG			C	T
1120	TM1120	A1	21356143	1	CCTTGGCAGGTCTTTTGCAGAAAGGCAACATTTCTTGCTTCCTCTGGATCCTTTGTTTTC[T/C]TGGTACCATCAGATAATTGCTGATTCTACCATTTTCTGTTTAGACCAATGGAGGACTATT	Gh_A01G0899	exon10	T	C	TTG	CTG	L	L	A01	21353813	21356870	+	AT5G42470	0	Q6DJ78	BRE_XENTR BRCA1-A complex subunit BRE OS=Xenopus tropicalis GN=bre PE=2 SV=1
1121	TM1121	A1	21367045	0.988	TAAGACTTGTAACTTCAACCTGCCCCACTGCAACTTCGTAGAGATAAAATTTGTTATCTT[T/C]GATTTGCTCCACTGCATCTTTAGGGAGATAAGATTTGTAACTTCAATATGCTCTACTGCA			T	C
1122	TM1122	A1	21372960	1	CCTATTTAGGTGACCACTTAGGGTTTTGTATGGTTCTACCTAGGGTAGGTTCCTAAGACT[T/C]ATTATATGTTGTTCGGTTTTAAAGTAAGGGTACTTGAACCGGAAGATTCATCAATCCCCA			T	C
1123	TM1123	A1	21463582	1	GGCATGTTTTAAGGTCTCGTAGGACCTTACGAGGGACAATGTGGTTGATATGAATAGATT[T/G]TTATTATAAATGTATGAATAAATGTGAATTGTATGTGATTTTCAGTAATGCCTCGTAACC			T	G
1124	TM1124	A1	21467597	0.965	ACTTATGTCTTTAACAGCTTTAAACACCAGATCCAAACTTCTATCGAGTAAATAGATGCC[T/C]CTAATTGATAAAACGTGGGAACTCATTAAGATATGTACACTTGACTCACTTTATTTCACT			T	C
1125	TM1125	A1	21477709	1	TATTCGGTACACAATTCCATGAAATTGACATGGCCTACCACACACTCGTGTGGGTCAAAT[G/A]GCCATGTAGTATGCCAGTATGGAATGGTTCAGCTCGTGTGGCTCTTGTAGCTTGCTTCGA			G	A
1126	TM1126	A1	21522888	0.988	ACCTTGAAAGAAGGGGGATAGAGGAATCAATTTTGTTACATTGTCTTTATGAGGCCGAAA[T/C]TACTTTTCTGAACTGAACGTTTGAAACGAGGCTCGAAATGGATTGATTTTCTCAAAAAAC			T	C
1127	TM1127	A1	21526117	1	ATTTACGATCATGAACACTCTTTGTTTTGCAAGGAATGTAAATTTGCTGAACTAGTTCAA[A/G]GTGTGGCCAGAGATGATTTTCAACTAGCTAACTCTGACTTCTCTGCCTTTCAAAGTAAAT			A	G
1129	TM1129	A1	21538216	1	TTTATAAGGACTGTAAATTTGTTGAACTAGTTCCAGGAGTGGCTAGAGAGACCTTGAAAG[C/T]AGGAGGATAGATGAATCAATTTTGTTATATTGTCTTTGTGATGCTGATGATAATTTTCCT			C	T
1130	TM1130	A1	21544193	0.935	TCTGCCTTTCAGAGCAAGTTAGATACTAGAAATGATGAATGTAGGCATGTTGAGTAAGAA[C/T]TCAAAACTAACATTGGAAGAAGGAAGACAAAGGAATCAATTTTGTTTCATTGTCTTTGTA			C	T
1131	TM1131	A1	21569305	1	TTGTTTTGTGTTGTTTGGTCTAGGGTTAGGTGTCGGGTTTGCTGTTGGGTTTTAAAATCT[A/G]GGTTGTGGTTTGTTCAGTTTGGTTGGGTATTGGGTATTGGGTTTTAGGTTTAAGGGATAG			A	G
1133	TM1133	A1	21578345	1	TATCCTGAACATCATGATCATCCATTTTCAACCTGGCTATCTCTACCGGTTCATCCAAAT[C/T]TGGAACATTGGGATCAGCAGGATTAGTTCCTGGGTTTGATACGAATGTACCTTGCCCTAG			C	T
1134	TM1134	A1	21586758	1	AATTTAGCAAGTGCGAATTTTGGTTACGAGATGTGACATTTCTAAGACACGTGGTGTCTG[C/T]TAAGGGGATCCGTGCCGAACCTAGAAATATTGAGGCTGTACTGGATTGGAAATAGCCTAA			C	T
1135	TM1135	A1	21590382	0.965	ATGATCATTGTTCGAATTGACGGTAAATGGATATTCCATCGAGATTTCCTAGAAACTCAA[C/T]GAAATTAATGTGACATATATATATACAAATGAGATGTTTGAGTGATGAGCTCATCTAAGA			C	T
1136	TM1136	A1	21597435	1	TAGCCTGGACTGGTAATCTCGACATCACCTTATGAGTTCATAAAATGGGGGATTTAGCCT[A/G]GACTGGTAATCCCGCCATAAGATGTGAGGTTCGCGGGAGTGCATATCTGAAATGATCATT			A	G
1137	TM1137	A1	21611981	1	AAATCAACTATGATTCGATTTGCTCCTTGTAAGCATAAGGATGCCAAACCATCTTGGATC[C/T]GCTTCAGCATTAACATCCGAAGGCGAGATCTGCTATGTGTCTGCTCTCCATCAAAGTGAA	Gh_A01G0903	intron	C	T					A01	21607775	21634630	+	AT1G19940	glycosyl hydrolase 9B5	Q9FXI9	GUN2_ARATH Endoglucanase 2 OS=Arabidopsis thaliana GN=At1g19940 PE=2 SV=1
1138	TM1138	A1	21619264	1	TGAACTCTTCACAATTTTGGATCATATGACCCATCTCCCCATGGAACTCATAATGGTTCT[T/C]TATTCCTTCTCCTCCTTTTCTAGAGGTCAGTATACCTCTCTTCACCATCTCCTCCCATAT	Gh_A01G0903	intron	T	C					A01	21607775	21634630	+	AT1G19940	glycosyl hydrolase 9B5	Q9FXI9	GUN2_ARATH Endoglucanase 2 OS=Arabidopsis thaliana GN=At1g19940 PE=2 SV=1
1139	TM1139	A1	21634937	0.965	ATTTAAAGACTCAGCTGTATAATATTTGGGTGATAGACAAGGACTTGGTTTACACTTAAC[A/C]TAAACTTCTCAGCACAGGTATAAATGACATAATTAAGGGATCAATTTCAGATTTATTTAT	Gh_A01G0903	utr	A	C					A01	21607775	21634630	+	AT1G19940	glycosyl hydrolase 9B5	Q9FXI9	GUN2_ARATH Endoglucanase 2 OS=Arabidopsis thaliana GN=At1g19940 PE=2 SV=1
1140	TM1140	A1	21644090	1	GTTAGGCTGATTTAGGCACATTCGGAACAAGGAATCGCCTAAGGCCACATAAATTGCGAG[A/T]TTGAAAGTCTAGCTCCATGACAGAAGTAACCACCTCTCCCGCACCAAGTCACCATTAACT			A	T
1141	TM1141	A1	21821460	0.965	GCCCGTTTCTCACTCTTTTTGCTATCCCAGGCTCTCCTGAGTATAAAACATGAAATTAAA[G/A]GATTAAGGGCATCAAATCCACTAAAACCAAAGAGAAATCATTCATAAATATTCCAAGCAT			G	A
1142	TM1142	A1	21981936	1	AATTGAAGCTGCTTGTGTTGTTTACCTCATTGTCTTTTCTTCTTGGGGCCAATCTTTTGG[T/C]CACTTCCCCCTCAATTTTACCGCCCCTTATGGCGTTCTCAATCATCTCCCCTGCCATAAC			T	C
1143	TM1143	A1	22129646	0.976	TCTAGGTACCTCTTGGGGTGTTTATATAAGCTTTAGAATGCTTCAAAACCCTCAAGAATG[G/A]CCTTTTCCAAATAGGACTAGACTTTGGCTCGACAGGGACACACCCGTATGAGGTGGCTTA			G	A
1145	TM1145	A1	22335010	1	TTGATGGTTTACTTGGTTCTTCACAGTTTCATCCAGTAATGCAGTGCGATGCAAGTGGAG[G/A]TGGAACGAGCAATTCAGAATACCCACCCTATGGTCACAACATGGAGAACGAAAAAATGAA			G	A
1146	TM1146	A1	22751266	1	AACACACGGGTGTGTGGTTGGCCGTGTGACCTAAGTCAGTAGCTACCCTAATTTGAACAT[G/T]GGTTGGGGTACGGCCGTGTGCCTCACATTGAATGCCCACGCGAACAGAGGCGTGTGTCCC			G	T
1147	TM1147	A1	24181826	0.949	GTCAATGACGTGCCTGTGCGACATACACCATAAGAAGTAGGCGTTGTGAGTGTTGACGGC[A/G]CCAGTGCTCTCTCGCCTCCCTGTAATCGTATGAGCTAAAATGGCGTGGAGGCACCTCAGG			A	G
1148	TM1148	A1	25714194	1	CAAGAGTTTTATTTGGGGCTATTCTAGTGATGGAAGAAATTGTCGCTGGTAAGTTGGAAG[T/C]CGATTTGTCAACCTAGGTCTTATGGAGGAGGCCTTGGGATAAGGTAGTTGAAGGACCATA			T	C
1149	TM1149	A1	25985801	0.935	TTTAATCTGTTAGGAGATTCTTGATAAGATTTTGGTTTCAACTTTCATTTGTGATATTAC[A/T]ACTCTATTTTGGTTTCCTCTTCTTTGTTGTTCAACTCACTACTAGAGATTAGATTGCTGG			A	T
1150	TM1150	A1	26542136	0.996	TTGATTCTCTACGATTTCTACGAGCTATACATTCAATTTTACTACCTGTAACACCCTAAA[C/T]CCGGTCCAGACATTATGGTCGAATCTGGTGATGTCACATGATAGGGTGTTTGAAAACTAA			C	T
1151	TM1151	A1	27728966	1	CAGTCAAATTAAGACATAAACAGAGAGCAACGTCACGACAAGGAGCCATGCAATGTCACA[A/G]CGACGCTAGGATGAGACAGGGGAAAGAAGAAACAACGTCGTGACGACACTACAGGGGACG			A	G
1152	TM1152	A1	29435733	1	TCGGCAGAAGTGGAGGTAAGGGAAAGAAACAATAGATGAACTGAGGGAAGTAGTGGCTGG[T/G]TTGGAAGAAGGAAAAAGGAAGAAAAGATGAAAAGGAAGGGTGATAGATTTGGCTAGGGAA			T	G
1153	TM1153	A1	30199870	1	TTATTACAATTAAGAGAAACAGAAACAATAGTGTGGCCATCTCCGAGTCCCTCGCAGCTC[C/T]AAACCATCTAAGCTTAGGGATTACCTGCACAGTTGGAAACGGGGTGAGTTTACGAAAACT			C	T
1154	TM1154	A1	30294217	0.935	TCCACACGGGTATATCCCCGCGCCACACGCCCGTGCTCAACATCAACACGCCCGTGCACT[G/T]CCTTACAACAGCCTTTAGTTCACTTTCTCAACTTTAGTTTTCCAATTTGTATTACTATAT			G	T
1155	TM1155	A1	30424241	0.996	TGTTCTCCAAAAACCATGGCAGGAGCTTAGCTTAGAATTGGAAACCCCTAGCCCTCCTCT[G/A]GATAGCAGAGAACCCCATCCAAGAGCACTCAAACCGAAATGTCTGACATGCCAGCAAGTG			G	A
1156	TM1156	A1	32107600	0.858	AGTATTTTACCCTTTTCAGTTTTGAGCCTTGGTGGCCGCACCTGCCCCAGGACGTGCCTG[T/A]TAGCTGCCATGGATTCTGGGATTAATTTATGAGCATTATCATTATAAATCGATATCTACC	Gh_A01G1018	intron	T	A					A01	32106898	32110382	+	AT1G58440	FAD/NAD(P)-binding oxidoreductase family protein	O48651	ERG1_PANGI Squalene monooxygenase OS=Panax ginseng PE=2 SV=1
1157	TM1157	A1	32220337	0.935	TTCAAAGAGGATAAAAAGACAAGGGCAAAGATAATTTTACTATAATGGCAAAAGAATAAA[G/T]AGTACAAAAGATGGAGATAAAACTAAACCCTGAAAACCCGAAAACAAAGAACCCTCAAAG			G	T
1158	TM1158	A1	32464588	0.976	TCAATCGCAGGAACTCAGCCTCATACTTGGCCACTGATCGATCTCCCTGAGTCAGATTCA[G/A]GAATTCTCTCCTACGGGCATCTACGTAGCTCGCCCCCACATATTTCCCTTGGAAGGTGGT			G	A
1159	TM1159	A1	32548315	0.988	GAGGAGGCTGAACGTTCAGATTTGCCCGAACAAATTCTGTGTACCAATTACTCATCATAC[G/A]GAGAAAGGCTTCCCGGGCCCCATCTCTCTAATTATGTGTCTCATGCCTGCTCTCAACTGG			G	A
1160	TM1160	A1	32553765	1	TTTATTGACATGATTTGGAAAGTTTGAAATTTATATCTTTTTTTAAACTTCGATAATGCT[C/T]CGTAACCCTATTTCGGCAACAGATAGGTGTTAGGGGAGTTACATTTATTGGTATCAAAGC			C	T
1161	TM1161	A1	32556429	1	CTATAGATAAGAGCCCCTTTCTCACTTTTTCAATCATCCCTCATCCCTTATTCATCCCTC[G/A]CTCATTAATCATTCTCTCCTCTCTCAATTCTCCTAGCTTTCTTAGCCCTCACGCCTATCA			G	A
1162	TM1162	A1	32990531	1	AAGGGCAGATCATGTTGGCCTCTCTGTTAAGATGGCCGCTACTCCTATTTCTCCCCCAGC[A/G]AGCTCATAGTTTGTGGCTTGCGAAAGTTCTCTGGTTGTTAGTTGTGGTAGTTCACCCGTC			A	G
1163	TM1163	A1	34200963	0.988	TAAAATTGTGCTTTTAATTCCCCTTGTTGGACCTTTTTTTCAGTCAATTAACTTAGCAAA[T/C]ATGTCCATCTTTTATCACCTTCTTTACTGGGTCAAGTAGTCAACCTCATAACCAAAATTC			T	C
1164	TM1164	A1	34294268	1	TTTTTGAGATTGAGCCGTTACGCTTAAGGGATGGTGGTATCTAAACATGAAAAATGTTTT[C/T]GCATTGAGGATGGTTTAAGAGACAGTTTGAGAGTCCTGATAGCTTCACAGAGGGAGCGAG			C	T
1165	TM1165	A1	34374141	1	CTTTTGATTAACACAGGATTGTGCTACTGAAGTGTGGATTAGCGAAAGTTGTTTTCTCGA[C/T]GTTCTTCCATTATTTCTTTAGTGCTCTCTTGTGAACTTATTTGGTTGTAAATGATGGTGA			C	T
1166	TM1166	A1	34620030	0.965	AAATCAATTTAATCAAGAGTAACATAGCAAATATAGTTCATACTTATAGGTATACTATAG[C/T]CGAATCTTTCAAAACACATCCAAATTACTAACCAACTTCAATGCACCACAAAACACTTAT			C	T
1167	TM1167	A1	34828983	1	TGCAAGAAAGTGACACAATTGAGTGTTTGGCTTAGTGGTTGTGTGCTCTTGAAGTGTTTG[G/C]GAAGTCATGGGTTCAAGCCTCGGCTTCTACAAAAATTTTAGTTTTTAAGGATACAACCCC			G	C
1168	TM1168	A1	35227986	1	TATGTAGTTCGTTTCAGTAGTAGATTAACGTGGTAGTAATATAATTGTAGGTAGTTCGTG[T/C]GAGGATCTCATCAAACGAATCGTCATAAAATAGGTGTGTAACTGACACCCTTTCTTAGTC			T	C
1169	TM1169	A1	35268941	0.935	TTGTATGTGTGTTAAACATCTTTTTCTAGGTGATTTTCATGAAAAACCCCTAAAAGGACC[C/T]TTTTGCAAAAGGTGTAAAATATGTGGTAAAAATGTGAAATAATGGAGAAATGTGGGCTGC			C	T
1170	TM1170	A1	35308636	1	AAATAAAATAATAAAATGGGAAAACAAAGCCAAAATTGGTATCATCTTCACCAAGCTTGG[T/C]CGAAACTCTCATAAACACCATAGCTAGGGTTTTTCCAACTTTCAAGCTCAATAGTAAGTG			T	C
1171	TM1171	A1	35489332	0.935	TAGAAAATGAGACTCGAGTAGATGATAATGAGTAAGTTAAGTTATGTTTACCTATGAGCT[A/G]TAAGCATGATGGCAAACGGTGAGATTGTTGTTGAATATTTATTTATATGCAACTTACTAA			A	G
1172	TM1172	A1	35627683	1	GAGAATCATGGATGACCTTGACTGCACCCCTGAGCAAAAACTAAAGGGTGTAGTGCCACT[A/G]TTGTGAGATGAGGCCTACCAATGGTGGCTTACAGTTAAAGAGGGAACTCAGCCTGATCGA			A	G
1173	TM1173	A1	35848121	0.915	AAATCTACAGGGGTCAACGGCTGTGTAGCCAGGTTGTGTGACTCACACGACCAAGAGGCA[C/T]GCCCGTGTATCTAGTCTTCGAAGTAGGGACACACGACCATGTCCCAGCTTGTAACAGCCC			C	T
1174	TM1174	A1	35935360	1	TTGCATGTTGGCTTTAATGGCAAGTAATTGAGCATATTTGGGAGTGTTGGAGAAGTCATG[T/G]GTTCAAACATGGGCTTTAGCTAATTTTTTTGTTTTTAGTTTAAATATTTATGGTTAAAAT			T	G
1175	TM1175	A1	36234499	0.935	AAATGCTGTAAGTAAAAGAATTTCGTATTATGAGATATTTGAATTTTTGTGAAACAGAGT[C/T]AGAGTGATTCCAGACTCCCTTGTCTTAACTTTAGAAAATCACTAAAAAGTGTACAAGAAT			C	T
1176	TM1176	A1	36263259	1	ACAGCAAAATGTACCAAGAGCAGCCATGGTTAGGGTTTGGCAAAGCTTCCAAGCATAATA[G/A]TAAGTGATTCCGAGCTCCGTTTTTAATGTTCTATGTATTTTTGAAATCCCAGTAACATGA			G	A
1177	TM1177	A1	36331560	1	CCCACCCAAATAACTTCTTAGGGTTGTCAAGCCTGGAGTTTAAATTCTTCCTCTCCCAAA[C/T]AGCTAATCCGTTAAGAAACTCTATCATTCAATCAATTAATTAAGTTAAAGCAATTGAAAC			C	T
1178	TM1178	A1	37227532	1	AAGATAATTGGGGTTTGTTTTGGGATTTGAGGTTGACGGCACAACAGGGAGATTTAGAGA[C/T]TTTTTAGGGTTTAAGAAAATTGCTTTGAGGGATATGAATGGAGAGGGGTTTATATAGGAA			C	T
1179	TM1179	A1	37269916	1	GTGCGACTACACTGACCTTCATGCATTACGACTTGGATATCTCCCTGTACAGGGCTTCAA[T/C]ACTGATGCTGTTTGTTTCTATAGAAACTAGACTCAAAAAGGAATCTATACATATATTTTA			T	C
1180	TM1180	A1	37351001	0.949	GCAGGATTTACATAGGTAGACTACACGACCGTGCCTATTCAACAGCCTTGACCAAAGGCT[A/G]GAGTAATCGCACACGGGCGTGTCCCTGCTAAGCCCAAGTATAGTCCTATTCGGAGAAGGC			A	G
1181	TM1181	A1	38003896	0.996	TACATTTAGGGGCATACGGCCAAGACACACGCCCGTGTGGCCTGCCCGTATACAACACTG[A/T]CTTAAACTTTTAGGTGCAGGCGACGCACGACCGTACTACACACATATGGGAGTGGCCCGT			A	T
1183	TM1183	A1	38453865	1	TGGGGAGATGCCTTGTCTTGGGCATTAGAGCGGACGACTCTCAGAAGATAGAGACATATA[T/C]GTGACTGACTCGACTGGCAGTACATTGAACTGGACCCTAGCAGAATAGATCGTGAATTTG			T	C
1184	TM1184	A1	38457103	1	CGTACTATGTACGACTATGCCAAGCCTAATTTAGCGGGGGTTGAATCGAGTATTGTAAGA[C/A]CTGCAATTGCTAAAAATAACTTCAAACTGAAGCCGAACACCATTCAGATGATCTAACAAT			C	A
1185	TM1185	A1	38461007	1	CAGAAACTCGCTTCCAAAACATCGAAACCGCATTCAAAAATCAGCAAGCGTCGTGTAACA[C/T]CCTGAAATAAGGCCAAAATGGAAAAGTGGTTGTGAAACCATGAATTCGAGATAGAAAAGT			C	T
1186	TM1186	A1	38469313	1	GCCACTTGACCACGTGCCTCTTTTGTGTCACCTTTCCTCTCGAAATATTTATAAGGCCTC[A/C]TTGCAGAAATTCTTGGTTGTGAAAAACAATAACCATTTGCGCACGCCGTGCCTTGAACCC			A	C
1187	TM1187	A1	38480345	0.965	ATTGAGGATAATGTACATCTTAAGTGTGGGGAGGTTATTTATATGATTATTTGAAAATCC[C/T]TGAATTATGCCTTGTGCTTTGATATACGGACAAAACGGGCTAATTTAAAGGTCCACATGG			C	T
1188	TM1188	A1	38558186	0.996	TGGGACTCCGTCTCAGCAGTGGGAGTACCAACTTTCTCGCTGGTCTCCAGGTTGGGCATA[A/C]TACTCATAAAGGATGACTCTACTCGAGCTCCTCCTCCGCATCCTTAATGCCCATATGTAC			A	C
1189	TM1189	A1	38565205	0.988	ATCATCTTTAGAGCATAAGCCTCTACTTATATCAAAGCATATGTATTGCATATGCATGGT[T/C]AGTGACTAACTCTAGATTTAGGTAAATCACACCATGAATGCCACAAGTGAATTAATTCAT			T	C
1190	TM1190	A1	38572357	1	CATGGCATGTTTTTCCTATAGGACGAAGATTCCAAGTAACGAAGAGATGGAGAACACGAT[C/A]ATGGAGATTAAGTTTAGATACGTGTCTGAACTCAATATAAAGAATGGGGTTAGGCTCCTT			C	A
1192	TM1192	A1	38591311	1	GGAGCACTCAACTTCGGAGCTATTTCCACTTCTTTTTCGGGTCGTTCCGGGAAGTCTTTG[G/A]GAAAGTGATCAAGAGAACCACATCTAAAACATGCGCCACTCTTCATTCGACACTCTCCGA			G	A
1193	TM1193	A1	38596434	1	CATAAAGTAAATATTTTGATGTCAGATTTGTGGTCCCAAAACTGCCATTCCGACTAGGCC[T/C]TATTTCAGGATGTTACAAGACTAGCTTCTGACGAGAATACCTAAGTGCGAGACAAGAGGG			T	C
1194	TM1194	A1	38599858	0.988	CCCCTTAATTACTTGTTGCGATTGTGTACACTTGCATATTTCCGTCGTTCCAAGTTTTTT[G/A]CGCTGTTGCCGGAGACCATTTTGAAAATCATTAATTGTGAATTTATTAATTTTTCATTTT			G	A
1195	TM1195	A1	38618598	0.988	GTAACGCCCCAAAAATCCCGAAACCCAAATATCCCGGAGTCCTGAACTTTCTTTATTTTC[G/A]GTTTTGATAAAAATTATGTTTTATATTCCTAGCCAAGTGATAATTATAGTAGGTCTTAAT			G	A
1196	TM1196	A1	38624034	1	CATATGGGTTGGGAATTATGGAATGGAGGAAGTATATGAGGATCACATGGTTGCTTGACA[G/A]TCGTGGATTCGCAGATGGCTTTTAAAGCCCAATGTGTAAATTGAGGTATTTTCGCAATCG			G	A
1197	TM1197	A1	38629231	1	CGCCTCTAGACTTGCTAACGTCTAGAGTGTGAACACTACTACAAAATATATGGAATTTGA[T/G]GAGGTGTCTGCAAGTATACGGGTCAGGTTGTAATATAGTTTGTTTACAGCAAAAATTTTC			T	G
1198	TM1198	A1	38633091	1	ATGTTCTCATGTTCAACATCTAATTGTGCAGATCAAAATGCCCCTGCTCATAAGTGCTTC[T/C]TGTACAGGACCGGTGTTGCGACATCGAGGGTAGTATGCTCATACTCAGAGTATCATTAGG			T	C
1199	TM1199	A1	38637598	1	ACCTCTTCTCAGTGCTTTTTGTCCTCTCCCCAAACCATTATCCCCTCAATCAGTACCACG[G/A]CCTTTAGGTGGTTGCTGAACTACTCTAGAAGGTTGAACAAAATCTAGAGCTGGAGTCTGT			G	A
1200	TM1200	A1	38725186	0.915	ATATGGCCATGGGCTTAAGTTAGTAGCTAGCTAAGTGTCACACGGCCATAGCACACGGGC[A/G]TGCCTATTGGTCGTGGGTGAAAGTCAGTATGGGTGCCCTGTTTTGGCACGGCTGGTTCAC			A	G
1201	TM1201	A1	38731377	0.935	GACTCATTTCCTCCGAAATCCGTACGAGGTAAGTCTAATTACAATTATGTGTTAAATTGA[C/A]TAATTTCCACATATATAAACTGTAATCTGTATTGGATGACCTTGAGAGCCTGATGAATAT			C	A
1202	TM1202	A1	38736955	1	TGGGTGGCATTTTGGCCTTGTAAATGGCCTATTTTTGCCCATACGGGCATGTGTCTCATC[T/C]GTGTTGCTCGAGGGCCATTTAGAAATGAGCCTAGGAAGACCACACAATCACTCACACACG			T	C
1203	TM1203	A1	38747666	0.965	GAACAAAAATTTATGTATCAGTTTTGTATGTTTGCTTACGTTTAAGTCCGGTAATGCCTC[A/G]TACCTTGTTCTGGCATCAAATACAGGTAAGGGGTGTTACATTTAGTGGTATCAGAACTAT			A	G
1204	TM1204	A1	38752529	0.949	TCAGGGACGAAAATCCCTAAACGGGGGAGTGTTGTAACAGCCCGATTTTGGGGCTAGTCG[A/G]AATAGTGATTTTGGGACCATGAATCTGACGTAGGAAAACTTGTTTTTATTATATTTTCAT			A	G
1205	TM1205	A1	38759298	1	GTTGCCAAATCTAGTGTGAGAATTGGCTCACACATAGGTATGAAATTGTACCTATGCTCC[T/C]AAATGTATATATATTTGGCGTGGAATTTCACATAATCTTCGTCAATTCTCCCCTGCAAGT			T	C
1206	TM1206	A1	38775087	1	TAATTGACAATAGGCCAAGAGCTCGCATTTTTAACACTAGGAATAGGAAATTCCATTAGG[T/C]TAATTTAGGTTTATTAGGTTAATTAAGTTTAATCACTATTTTAATTTGGTTTCACACTAC			T	C
1207	TM1207	A1	38781762	1	AAAGGAAAAATTATGGAATAGTCCCTACGAGTCGACCGTTGGTATATATTAGGTAAGTTC[G/A]TAGTATAAGATATACATATGTTCTTATTTATGAATTGTATTAATATATGTTGATTTAATT			G	A
1208	TM1208	A1	38784145	0.935	TGTTATGATGAACATATTTATGAATATTTGTGATGTTGAATTGTTTAATTTAATTAATAT[A/G]GCTTGAATTTAATTCGTGTTAGGTTGATTGCATTTCGTCTACTTGAGTTATTAAAATTGT			A	G
1209	TM1209	A1	38789858	0.935	GCCAGCTGATGCTTAAGACTTAAAGGAAGTTCAATCGAGTGTTGAAATTTTAGTTTCATC[A/G]GAACCTGAATCTGCAAAATCTAATAAGGTAACTTCTAAACCAGCTAATTCTGATAAACTA			A	G
1210	TM1210	A1	38795665	0.935	TTACACTCAGAAAAAACTATCGACTATTTGTCCACTTTTCGTTTTCCTCAATCTAGTTCC[A/G]GTATTTTCTTATCTTGATCTATGTAATATCAAATTAACTCATTCAAACTTTCATTCAATT			A	G
1211	TM1211	A1	38804517	0.988	TTAGTTTAGATAAAACAAACCTCTTTAATTTTAGGCTAGATAATAAAAACAAAGTTAATA[T/C]TAGTACTTTTAGTTCCTTTGGGTTCGACAATCTGGTCTTGCTAAAGCTATACTACTGTTC			T	C
1212	TM1212	A1	38818319	0.988	CTAGGGAATAGGATGACTCATGTTATTTTATTGACTCTATTGATCATGCTACTCAAGATT[A/C]TTTTTAGGAAATCATACATAAGGACACGTTAGAACTGTGTCTTGCCCAAGAAGAGGAGGG			A	C
1213	TM1213	A1	38825494	0.965	ACATAAATAATATGTCATGCTCACGTGCAGATATCAAATCATAGCATCATCATCAAATCA[A/G]AGCAGATACACATGCTTAAATTATCATGCTTTTACATACATCTTAATATCAGATCAGAGT			A	G
1214	TM1214	A1	38830695	0.996	TATCCTTAATCTGATCCAGCCATGTCAGTCTAACCTGCAACTCAGCCAGGAGACTCCCAT[T/C]GTCATAAAGACTTAGTCAAGCGAACATCGCCCTCAAATCGGTCATAGCCCTACGGCTTAA			T	C
1215	TM1215	A1	38837185	1	AATGAGCTAAAAACAGTAAGCTCTTATGAGCTGATATATCGGTCAGCTCATACGAGCTGT[G/T]GTGAGTGCACAAAAAATGCGGGAGCTCAACCAGAACGGTAACCCCAGTAACATGTCACCC			G	T
1216	TM1216	A1	38864576	0.988	AAAATTCAAACATGCAGTTTTCACACATGCATATATACATATAATAAGCCTTAAGTATGA[T/C]GGTTAATTATTTTTATGACTTGGTTTTGTGGTCCCGAAACCACTTTCCGACTAGGGTCAC			T	C
1218	TM1218	A1	38874172	1	GGAAATGCAAGTGGCAGTCAAAGAGGGAATAAAGATACAGCAGTCAGATCTAAGGCTCGT[G/A]CACCTACCAGAGCCTATGCTATATGCGCACGAGAGGAGGCTTCATCCCCAGATGTTATTA			G	A
1219	TM1219	A1	38878521	1	CACAGGCGTGTGTCTAGGCCATGTGTGACACATGGCAACCTCCTTGGGCGTGTTGTCCGA[T/C]TGTGTGTCCCCCTGCACGTAAAAATTCCAAGTCAGAATGCATGGTAGTAAACACACAAGC			T	C
1220	TM1220	A1	38890003	1	TACTGGTACTTCATTGGATGCTTATGTTCTTTGCTGAGATTATTTAGAAAAGACCATGTG[G/C]TGAACAAAAGCCTTTTTGCCTAAGAGAGGGAGATAACATTAGGAGCAAATATATTTTGTT			G	C
1222	TM1222	A1	38908099	0.988	TTGCAACATGTATGAATGCGCGGGGGCCAAATCTGGAAATAATCCAGACCCCAAAACGCA[T/G]CGTTGAAGCGCAAACCAAATTGAGTTCGTGCATAAATCACAGAACTAATTTAAAAGAGGA			T	G
1223	TM1223	A1	38914114	1	ACAAAAGAGTTCTCAGTTATGGAAGAAATAGAAAACTTTATTTCTATAGAAAGCCATCTT[G/A]AATAAAATCCATTGGAGAAAGCCTTAGGGTTTGACCCTTTGGAGGATGAAGAAGGTGAAG	Gh_A01G1067	utr	G	A					A01	38913470	38913976	+	0	0	0	0
1224	TM1224	A1	38921539	1	CTTATTGGTACGTTGATTCTGAGAACTGGAACTTCTATCAAACCGCTTGAGGTTAAATTC[G/A]CGTAGAATTCTCGAATTAGTTCCTCATCCACACTAGGCCTCTTTTCACAAAACAATTCCC			G	A
1225	TM1225	A1	38925969	0.976	CTTCTCAAGCCCATCCTCCCTGACTAACTGTAATGGGCCTTTCACTACTATCTGGTGGCA[G/C]TGTCCCTTCTGCGAGAGCCGACGCGTTACTCTCTACATCATCTGCACCAGCTTGTTCAGG			G	C
1226	TM1226	A1	38931013	1	GATCTGATGTCAAAATTTGTTCCAATGGATCCTCAACATAGTTGAGCTCCTTCTCCACTA[C/T]TAAATCTTCTAAATCGGATACTACAGATCAATCATCGATTGTGTCAGGAAATCGTATAGA			C	T
1227	TM1227	A1	38933195	0.988	CCAGATTAAAATCATTAAATACTGGCACGGCATACTGTGTAAAGCTCTATCCCTATCATT[T/A]GCAATAAGGATAGGATTTTGAGCAAGGTTTGCTGCATTTACTTGGATTAGATTTTTGAAG			T	A
1228	TM1228	A1	38935939	1	TTTGCTTAAACCCTAAAAAAATCCCTAAACTTTTCTCTTGTGCCATCAACCTCAAATCCC[A/G]AAAGAAACCCTAATTCTTTTCCCCTTTGTCGAAATCTCCTATTGCCACCGCAAAGAAATT			A	G
1229	TM1229	A1	38939721	0.996	TAGCCTCTTAAAGAACCGTTGGTTGGCCACCTCGGAGAGCCATCAACAAAGGAGCAAAGC[G/A]AAGGAACGAAAGAGCCTTCATCAGTCAAAGTCTTGGGTGACTGCCACTCTGAATTGGGTT			G	A
1230	TM1230	A1	38971809	1	AGGAAGCTAAAAGTGACTCTGAAATTTAAGAGGAACTGAGAGTTGAGTCCACAAGCTATC[A/G]GGCCATATTAAATTATAGAGAGTATAAGGTCAAGATGAACTGGCTAGTTTCACTATTTGA			A	G
1231	TM1231	A1	38977450	0.965	CGATCCAGCTATTGAAGGGAATAAATGATTTCAAGCACTTTAAGACTATGGCATGTATAG[G/A]GACTTAGTCAATTCGATATGTGTCATTTGATTTGGCCAAATGTATTGGCTCATAATGGGA			G	A
1232	TM1232	A1	38985216	1	ATAAAAATTAATTGGAATAAACTTTTCTATCTTGAATTCATGGTTTCGCAACCACTGTTC[T/C]GTTTAGGCCCTATTTTGGGATGTTACATTTCTCCCCTCCTTTAGGGATTTTTGTCCTTGA			T	C
1233	TM1233	A1	38988666	0.996	GGGGAGGATGCCTCTTCAGGAGCACAGATAGCATAGGTCCTTGTAGGTGCTCTATCATCT[G/A]GTCTCGCTGTTGAATCTCTAGATGCACCTCTACCTGCCCCTATTCCCAAACTTCTTTGAG			G	A
1234	TM1234	A1	38995486	0.965	TGATTTTCAAACGTTTCTGAAATCTTTATATTGTTGTAATTTGATTTTCCCTCTTCTGTC[T/A]TGGCATCTTTAACAATTTCATTAGCTGAGTCCCACTTCTGAGTAATTTCCTTACAATGCT			T	A
1235	TM1235	A1	38999216	0.915	ACGAGTGAGGACACAGCCGTGTGTCCCTAGTTCGAAGGTTACACGGCCTGAGACTCGGGC[G/A]TGTGTGGCACATGGCCTGGCCATACAACCGTGTGACCCCTGTTTTGCAAACTTTTCATCT			G	A
1236	TM1236	A1	39005862	0.965	TCCTGGATCCCATCCAAAAAGTCATCGCAAGTCTGTTGATTTCTCAAACTTGAAAATTGG[C/A]AGCTTCGATGAATGGAATTTAATAAATTTCACCCCAACCATGCATGTATCAGGCTTCATT			C	A
1237	TM1237	A1	39010606	1	TTTTGTCCATCTTCAACCCCATGGCCAAATTTCACAAGGGGAAACCATGGCTAGGGCTTT[T/C]CAAGCTTCCAAGCTCGATTGTAAGTCAGTTCTAGCCCCATTTTTAGTGATTTTTCATGTT			T	C
1238	TM1238	A1	39015581	1	ATGTTGAATGAGATGTGTTAATATATGATTAAATATGCATGATATTTGATATATATCCGG[T/G]TTAAATCCCGCAGGCTTCGTACTGGTATTATATCCGGGTTAAATCCCGCAGGCTTCGTAG			T	G
1239	TM1239	A1	39086997	0.965	TATACTATATCAAACGGTCTGATTTTTTAATCACTCTTGACAACATACAGTACCTCAATG[C/T]TCAACATCCAAAACATCAAAGTTTTAAAGAAATTCACTATATATGTATGCAACGGTTTTA	Gh_A01G1069	utr	C	T					A01	39085115	39086578	+	AT1G66240	homolog of anti-oxidant 1	Q94BT9	ATOX1_ARATH Copper transport protein ATX1 OS=Arabidopsis thaliana GN=ATX1 PE=1 SV=1
1240	TM1240	A1	39351358	1	GCCCAAAACCTAGACCAAGACCTAAAAACTGGTTGAATCAAACACAGTATGTGAAACCGC[A/G]CTGACGGTCCAATCGATGGCTATACCGGACCGGTCGGGTTGTCATTGACCTGGACCTAAC			A	G
1241	TM1241	A1	39628929	1	TATTGGGTTTATAAAGTATCCTATTCAGGTAGCATGAAACTTGAACCTGTGACTGCATAA[T/C]CACTGTCAAATAGGACCCCTACTTATACTTCAACCCATGACCGTATAACCACGTGAACTA			T	C
1242	TM1242	A1	39762555	0.915	GCGTCAGCCACCACGCCCTTCGACCCAACCAACATCTTCGGTCGTCGGTTCCTCCATCGA[C/A]TCCAACTTCGACAGTGCCGAACAGCACATGTACAACGGTCCCTCTGAGAGTCACGACGAC			C	A
1243	TM1243	A1	39870012	1	AGTCATGAGAACAAAGTCGGTGAAAGCAGCAAGCGTTTTTAACATTGATGTAGTCACCAT[T/A]TTGTCAAATCAGGTAGAACTTTTGAGTAAAAAGAGTGATGGTTTGTGTAGTTCTACGTAA			T	A
1244	TM1244	A1	39911067	0.988	TTCTACCAATGAATACATTTATGTCTCCACTCATAGAATCAACTGCTCCAATAGCCAAGA[C/T]TAGCCATCTCCCCAATTGGAATTGTAGATGACATAATAATCCTTCTCAATATTTGAATAA			C	T
1245	TM1245	A1	39916205	1	AGTCTTTGTATACGTCATCAAATACCAACCATACCAAATTTTTGACTTTTCAACTCTTTT[T/C]CCCCCCTATGGCCAGCCATAAACATTTTAAGGGCCTAATTACTCTTTAAACACCCCAAAT			T	C
1246	TM1246	A1	39942597	0.988	AAATTCTTCAGCCCCTTGTTTTCGAATCTTATCAATCGGAGACTTATTCAGTCTTACCAA[A/T]TCCACACCTTGAGGAGCTACAGGAATCGATTGGGGATAAGGAGGGGTGGAGGATGTTGAC			A	T
1247	TM1247	A1	39945792	1	TCTGATTTGACCCTAAAATGAGTTGTTACACACGATCTCTGTTGGAATACCCCAATGAAG[C/T]AGTCAAACGGCTATAAGAATCCCTTGATTTCTTTGAAGAAGAATGATAGGGTTTACTCAT			C	T
1248	TM1248	A1	39950140	0.935	AATCCATAGCAATTTCATACTAATTGCTCCTAGAACCCAAGTTTTGCAATTTATTCAATT[C/T]GGTCCCTAATTTCCAATTGGACACCTTATACTTCAAATTTCTTCATGAAACTTTCACACA			C	T
1249	TM1249	A1	39969091	1	TTTGATGAAAACCACCATGCTTGACAAATGTAAGCCCCATTACATGTATTCGGTAGAATA[A/C]CCTGTGTTTTTCCAATCTTCAAACCTCTCTTTGGTTCTTGTCCTTGGTCATAAGCGCTTA			A	C
1250	TM1250	A1	39973947	1	TCCTTTCACTGAGTCATGATTCAATCCATTTGCATACTTACCATTTCATTCCCTTTTCTT[T/G]CCCATTGAACCACCTAGAATTGCATCAGATACTCGAGAAAGCTCACACGAAATGTGCCTT			T	G
1251	TM1251	A1	39985812	0.935	TAATTGGACCCTCTGTAACACCTCTCACCCATATTTGACGCGGGAACAGGGTTACGAGGC[G/A]TTACTGGACTTACATCGCAAACAATCATACAGTTTCGAGTCATAAATTTCAATCAAATTA			G	A
1252	TM1252	A1	39991217	1	GACCTTCCTTTCATGATGCCAACCATAAAATAAAATAAAATAAATTTTTAATGTTAGCTC[A/G]GATTTGTGGTCCTGAAACCACTGTTCCAATCTCACTGAAAAATAGGCTGTTATAATCCAG			A	G
1253	TM1253	A1	40003449	0.965	TAAGAAAGTGATCATAAGAACCACATTTGAAGCATGATCCTTCTTTCAATCTACACTCTC[T/C]GAAGTGTCTTCAATTGCATTGATGGCATTCAGGTTTGTTGTTTCTAACATTACCTACACT			T	C
1254	TM1254	A1	40017015	0.965	TGCTTACCCCCTTCCTTTCCTTTTCTTATATTGTCGCCAAGCTAGCTCAGGGATTGGAAG[G/A]CATCGGAGACTCAATCACGTTATCAATTGAATATTTGGGTATAGTTAGTCTCATCATTTT			G	A
1255	TM1255	A1	40030073	1	TTTAAGAACACATTCCAGAGAAAGTATATTGAGACGAGTTATGTTGAGGCTCGCCGACGT[A/G]AGTTTGTGAGCCTAGTTCTGGGCGACCAATCTGTGGTTGAATATGAAGCCAAGTTTCTGC			A	G
1256	TM1256	A1	40038306	1	AATTAATTTTCCTCATCAGATTTGTGGTCCTAAAATCGCTGTTCCGACTAGGCCCAAAAT[C/T]AGGATGTTACAGTTTACATATATATCAAGTAAGAATATATGAGCTCATCATGCATTACTC			C	T
1257	TM1257	A1	40049404	0.935	AACATGATGGGTGGAAGCTACAAATGGGAAAATAATGAAAGATGGGATTTAGATTCAATG[G/C]AAAGAACAAGTCGAATGAAGTAGATATTGTTACCACTAAATGATCTAGAAAGCAATTCTT	Gh_A01G1083	intron	G	C					A01	40044435	40057954	-	AT2G41740	villin 2	O81644	VILI2_ARATH Villin-2 OS=Arabidopsis thaliana GN=VLN2 PE=1 SV=2
1258	TM1258	A1	40062861	0.965	TCATTCAAGCTTGCCACAAATTGAAATTTGCAATTCTATCAAACTTCTCAATTTCAAGGA[C/T]GAAATTTTCTAAGGAGGGAGAGTTTTTACAACCCATTTTCAGTGGTATCAAAAAAAGTGA			C	T
1260	TM1260	A1	40081687	0.996	GCTTTAGCTACAGAATGGGAACTCAATCCTGTAGAGGACCTATTGGAGCGAGTCTTAGTG[T/C]TTGACTCGCCAAGTGATAAACAAATGGAGGAATACTTAGCTTTGTTAGAGGCTCATTCAA			T	C
1261	TM1261	A1	40087959	0.976	CGTTGTTGCAACCCTTCACCGCTAGTCACCTCTCACTGTCACATACCCTGGTTGTTGCAC[C/G]ACCAAATTCCATCCTTTGCAACCCCAAAGAACCACACTCCCAATCACCCTAACCAACGCC			C	G
1262	TM1262	A1	40109771	1	ATTTGGACAGGAGCTAGATTAAGTCTAATGTAGCATCCTTGACCCTACACGCAGTACTTA[A/G]GCCACCAGCTATGGTTGAGTTACCTGATATTACACCATGCTAACCTTTAAAAGAAGAAAT	Gh_A01G1084	intron	A	G					A01	40097779	40117891	-	AT2G41790	Insulinase (Peptidase family M16) family protein	O22941	PXM16_ARATH Zinc-metallopeptidase, peroxisomal OS=Arabidopsis thaliana GN=PXM16 PE=2 SV=1
1264	TM1264	A1	40121526	0.935	GTAGGAAAAAGATATATAATTTTTAGGCTAAAACCTTAGACTTAGCTTACGTCAGACCTT[C/G]CAAATGTAATTATCCCCAAGAACACCAACTTCTTTTCAATTTGTGTACACATTCTCTTTG			C	G
1265	TM1265	A1	40136674	1	TCCAGTAGTACCACTATTCCCTAGTCGTCTACCTCTAGTAGTAGTAACAATTGGTTTTGC[G/A]TTCTGATCTCATTTTTGCTCAATTCGATTTAGGAAATCTTTCTTGAAATGATCAAGAGAT			G	A
1266	TM1266	A1	40139474	0.965	GTTGGTTTGGATGTTTGATAAACAAAATAATAATGGAAGGACGACACTTGAAGTTTTGAT[A/G]GGTGGTAACCATAATTAGAAGGGTCACTATAAGAATACCCATAACAGTAATTGTATTGAT			A	G
1267	TM1267	A1	40142262	0.996	TATATCCCAGCTGCTCAACAGATCTAAGCTGATGGAAGGCAGCTTGCTCTCCAATAAGAG[C/A]AACAAGCTGAAGTTTCACATTCAAAATAAAATCATCCCGATGAACCTGACCATTCACATG	Gh_A01G1085	exon22	C	A	GCT	TCT	A	S	A01	40140517	40162783	-	AT2G41790	Insulinase (Peptidase family M16) family protein	O22941	PXM16_ARATH Zinc-metallopeptidase, peroxisomal OS=Arabidopsis thaliana GN=PXM16 PE=2 SV=1
1268	TM1268	A1	40153125	1	ATAAAAAAATAAAAACTTCATTTATCGGGGAAGGTTCAACTTGGCTCTTGATACCATGTG[C/A]AATAGAAAATAGCTGCTGTTGCAACTCTACTGTTGGCTGTAGCAACGTGAAAAAGAAAGA	Gh_A01G1085	intron	C	A					A01	40140517	40162783	-	AT2G41790	Insulinase (Peptidase family M16) family protein	O22941	PXM16_ARATH Zinc-metallopeptidase, peroxisomal OS=Arabidopsis thaliana GN=PXM16 PE=2 SV=1
1269	TM1269	A1	40169584	0.988	CGTTCTTAACTATATATGCTTCCAATAAGTTCTCCAAACTACTTGAAGACTCGGCTAGCT[A/G]ATTTTTTTCATTTGTTGAGAAAAACTTGACCAATGATTTGAACGCTAAGGCATATAGGAA			A	G
1270	TM1270	A1	40178784	1	CACGGCTTGAGACACAGGCGTGTGACTTAGTTGTGTGTGACCCACGGCCAGGTGACACGG[C/T]TGTGTGTCCCTTGTAGGTTTTAATGTATGCAAGTCAGGCTATTACACGGCCTAGCACATG			C	T
1271	TM1271	A1	40182268	0.949	GAAATGAGCTTGCTCACACGAGCTGTGAGTTGGAATGTAAGCTACATGATGCTTCTCACA[C/T]GAGTTGTGGAGTATTCGCAACAAATGTAGGACCTCAGCCACCGGTAGGACATTCAAGACC			C	T
1272	TM1272	A1	40191032	1	AAAAAGAAATAAAAACTTAAATGCTTAAAAAAAACCAAGTCCAAATTATCTTGCTAGCCG[A/G]CCACCCAGAGTCCCTCTAAACATCGAAATTTCTACTGAGCATCACTTAAAAATAAAATAA			A	G
1273	TM1273	A1	40196587	0.996	GACCGAAGTAGGAGTAGTGATTGCACCAAGGGTATTTGGCCAAAGAGGTTCAGCCCTTTA[C/T]GATTTTGTATGGCAAAAGAGGGTTATTTGGCTCCAAGGAAAAAGAAAGAAAAGTCAGCAA			C	T
1274	TM1274	A1	40198700	1	TCACACAAGTGGCCCAGATGTCGTGGCATGAATATCCTATTTATTTCCTAAGGTTCAAAC[A/C]GAAATTTTTACTATCCCATTTATCATTAAACATTCTCAATTCCACAATCAAGTAATTCAT			A	C
1275	TM1275	A1	40200866	0.988	TAAATCTAATAAGCGCATAAAAGAATGTGTGAGGTAACAAGGTATCCTTACCTTGAAACA[G/A]TTTAATCACAATAATCTTGCAAGTTATGCAAGGCAAATGTATCGCCAGATACAATGCTAA			G	A
1276	TM1276	A1	40208045	0.976	CTCAGTTGGTGAACAAAACAGTTCATCAAAACCCTAATTGTATTCTCTAGCCAAAATTTT[G/A]CTCTCTCGGGATCATCCTCAGCAGTAGCTCTGAATTTCTCAGCCCTATACTTATGAATCC			G	A
1277	TM1277	A1	40218292	0.965	GAGCTACTTGATAAATATGAAATGATATCAAGTATTGGTTCTGACATTCCGTGGAAGACA[G/A]CAAAGATGTATGATTGAGGAAAATCCTCGTTTGAAGCTTGGGAATAGATTAGGATACAAG			G	A
1278	TM1278	A1	40221751	1	CCAAAAACCCCTGAAGGAAATTGAAGGGAAATCTTAGTCTTGAAGGAGAATCCGGCTTCT[G/A]AGATGGATCAATCGACTTTCTTCGAGTAATTCCTTGCCTCCTACTCTGTGTGTTCACCTC			G	A
1279	TM1279	A1	40224078	1	CTTCTTCTCTGCTCGTTCTTGTTGAACTGAGGCTTCTACAAGCACTTGAATGCTGCTGCC[C/T]AAGGTTGGGAAGGGATATTTTCCAAGAGGGAAATCGATAAGGAAGGGTCTCAGGTCGTGT			C	T
1280	TM1280	A1	40228915	0.996	AGGATTGAAGCATGACTTACACGGGTAGACTACATGCCCATGCCTATTCAACAGCCTTGA[T/C]AAAGGGCTGGAGTAATCGCACATGGGCGTGTCCCTGCTGAGCCCAAGCATAGCCCTATTC			T	C
1281	TM1281	A1	40232602	1	CATCAGACCCTCGCATTGCCACTTCTGAACTTAACGGAGAAATCCCTCTTACGGTACTCA[A/G]TATTTTCCCATATAGTACAGTCGAGGTAATTCATCCCAAATGCAGCACTTTTAAGGTAAA			A	G
1282	TM1282	A1	40236728	0.996	AATGATTAATTATAAATTTTTAAAACCTATCGTGAATATCAAGTACCATGCTGTAGCTCC[T/C]GCTCAAGGGATAGTGCCTTCTAAATCTAGACCCGTGTCGAGTAGTCATAGAGGTGAGGTT			T	C
1283	TM1283	A1	40239801	0.965	TTGCTGATACTTTGAGCAGAAAATCATTATTTTCTTTGAATACGATGAATGTACAATTAA[C/A]TTTATTTGATGACGGTTCGATTCTAGCTGAGTTGAAAGTAAGACCGTTATTTCTTCAGCA			C	A
1285	TM1285	A1	40254425	1	GTTAATGAATGTTGTGATTATTTCATATTTACATATGAAGTTACTAAGCTTCATAGCTTA[C/A]TTTGTATAGCCATTTTTAAGGCATACAGGCTAGGCAGACATGTGTGTGTGTGTTGGCTGT			C	A
1286	TM1286	A1	40260810	0.988	GGGTCACATGCCAGTGTGGACAAATGCTAGGCTATGGTCCAAGCCATTTTTCCACCCTCA[G/C]AACAAATGCACACTCACATATCTCAATGGCATCCAACATGTCATAAATGAACACTTAATA			G	C
1287	TM1287	A1	40265160	0.965	TATGAACTTATTCGACATAATTCTCGTAAATTTTTCGCCACAAAAGCAACACTGGTAATG[G/A]GGAGTTGTAAATCCTCTAACTTAACTCTCATAAATACACATATATGACTCAACATTCTTC			G	A
1288	TM1288	A1	40283066	0.965	GTCGAATCTGTGATGTCACATTGGCGTAAGTTTTGAATAGCGTAGTTTCACTAGAAAAGT[T/C]TGTTTGTTTTAAAACCTCATTTGTGTTCTTTAAGAGAAGTTAACTTATTTGTTCATTTGT			T	C
1289	TM1289	A1	40288270	0.965	CCTTGAGAGCATGAAATTTTTTCTAAGTTTTCCAAAGTTTTTAAATGTTATCGATTTAGT[C/T]TCGAACCTCTTTTAAGCATGTTTTAAGGTCTCGTAGGACCTTATAAAGTACAATGTGAAT			C	T
1290	TM1290	A1	40293146	0.988	ACTGATCCTTGAGCTAGATAGGCGGTACTATAAGAAAATGAAAAAGGAGAGGAAGTAAGC[T/A]TAAAGCTTTGTAAGTTGCACATAAATAAATATACAACAGAACTTTACCATTCATCAACAA			T	A
1291	TM1291	A1	40300237	1	GGACATTCTATTTCTAACGTCAGCAACCCCAAAATGTCATACAGCCAAGTAACACGCCGT[G/A]TACTAGGCTGTGTCCTTTACACGGCTGCACGGTCATGTCTCTGCCCATGTTTTTATTATC			G	A
1292	TM1292	A1	40309122	1	AATTTCCAGACAAGCTGGCTAACTGCGTCACTGTCACCTTAAAAGTCATATCTCAAGTTC[G/C]AAAACTAGAAAATCAGTTCCGTAAATTTTTCCTGAAACTAGACTCATATGTCCATCTACA			G	C
1293	TM1293	A1	40320677	0.996	TTGCGGTCAAAGACACTGCGAAATCAGAGGCTCGAGCCCCAGTAAGAACGTATGCAATAC[G/A]CACTTGAAAGGAAGCCTCTGCTCCTGACATCATCACGGGTACTTTTTCTCTTCTTAATAC			G	A
1294	TM1294	A1	40325844	1	ATGGAGGCATGCTAATTAATCGATAAGTTTACTTTCCAGTTATTCGGGCTCATGTAAATG[C/T]TTATCCCTCTCTTTTCCTTGTTTCACAGAACTCGTGGACCCATGAAGATTGGGAGATGGA			C	T
1295	TM1295	A1	40339706	1	TGTTTTCATGCGAACTCATGCTTTATACTGTACTGCGAACTCATATGTTATTCTAATGGG[C/T]GAACCTATGTTGTTAGACGTATTCAAGCCTAAGTTGTGGTGCAAACCCTACCTATGTATG			C	T
1296	TM1296	A1	40354527	1	ATTTTTAATTCAAAACTTTTCATACACATGCATAATGTCCCATACACGGGCCTAAGATTC[C/T]CTAAACATGCATTGAAATTCGTTAGGGACTAAACCGAGAACCTTAGAAAGTTTTTGAGAA			C	T
1297	TM1297	A1	40360328	0.965	CAAATAGGTATACATGAACATTCATTCCATCTATATTTTTGATAAGTTATCTAAACACAT[G/T]CTTTTTCCCGAGTAAATCGGCCATATACATCATAGAATCATCAACTAAACATAAATAAAC			G	T
1298	TM1298	A1	40374339	0.935	TGTCCATTAAACATCCATATTCAAGGCAACATCACTCATTTCCATTTAATTCATGATCCA[C/T]TGGCCTGCATTTAACTTACTTAATGTATTACCAATCATGCATAACAAACAAAGCTAACTA			C	T
1299	TM1299	A1	40380614	0.965	CAACACTTAATTGAATTATCTACTAATCTTAACTAGGAATACCCATTCAGTCTTATCTCC[A/G]CTAAGTGTTACTACTGAAGATACCATTTCGGTCTCTTTAGGCAAATAGATACCCTTTTGG			A	G
1300	TM1300	A1	40386188	0.935	AATTCAAAGGACTGTATTTGATTTGTGGGAGTTCAGAGATCTGTTTATCCAATGTATGAT[C/T]ACACATTTACTTATTGCCATGGATGTGTTATGCCAATTTAATCGATTGATTGTGTCAATA			C	T
1301	TM1301	A1	40390699	1	TCAAATGGTGTGCAAAAAGGAAATGAATTGAAACAAAATTCAAAAATGAAGAGGAAAAAA[A/G]GAGATAGAATTTCGGCGAAGAAGCAGAGAACCATGTTCGAAAATTTGGGAAAAGCCACTG			A	G
1302	TM1302	A1	40398432	0.949	AGAAAATATACACCTGATAGGAGACTGGAGTTAATCCGCGCTCCGAGCACTCTTAGCCGA[C/T]GCCCAACCCAAACGAGCACGCCATAAAGCAAAAGGGATCAGCCAAGAAAGGTACCTTTAC			C	T
1303	TM1303	A1	40415673	1	ATTTCGGCAAAGGTAAGGTTCTTAAGGCCATTATGGAGGGTAGCCGAATGTGTAAGTGTT[T/G]ATATTAGATGGTTCTCGATTTGGTTCAATTATTATGAGCTGATCTATTAACGGTTGATTA			T	G
1304	TM1304	A1	40419149	0.996	TGTTAAAAGAGCAAGGATGGAGGAACCGGTTCAAGCAGTTCCAGTAAATACTTTTACCGC[A/C]GGCTTCCAGGGACTGTGGTAAGATGCATATGGGGGAGTGCTGCAAAACGAACTGGAGCAT			A	C
1305	TM1305	A1	40423817	0.976	GGTATAAGCTCTATTGGGTGTTTCTTTTAATCTTTTTATGGTTTGTTTAGTGGAGGAGCA[G/T]CAAGGCGTAGGGTCGACTTGGATAAGTTTGGATCATCAGAGTGGCTAGAGCTAGTCATCA			G	T
1306	TM1306	A1	40426323	1	GTACTGATACCGTGTTATTCAATCTTTGTTTGTTATTGGGATTACACACTGAGTTTTCGT[T/A]AACTCACCCCGTTTCTAACTGTGCAGGTAATCCCTAAGCTTAGATGGTTTGGACCTGCGA			T	A
1307	TM1307	A1	40439088	1	ACTGTAACATCCTAAAATAGGGCCTAAATGGAATAGTGGTTGCGAAACCAAGAATCTGAG[A/G]TCAAAAAAATTATTCTGATTAAGTTTTAAGGTTTATTCATTGACTGAATAATTGTGTGAA			A	G
1308	TM1308	A1	40447126	1	TTTCTTTGCTACCCATGCCAAGTCGAACCTTTTTCATGCTTAAAGCAGCCTACATGTTCC[T/G]TTAAAATAGATTTATGACACGTATTTCATAACTTTCATAAATATGTCCTTTTGGGCGTTT			T	G
1309	TM1309	A1	40458140	0.935	ATAATATGGTCTCAAGATAAGGCAATCATAATTGCACAAAGTTCCACTATTCACTTATGT[C/T]CATATCAAGCTGTCTACGCGAGTTATAGTCACTAAATTATTTATATCTTGATCTACGGAA			C	T
1310	TM1310	A1	40461060	1	TTATCGGCTTACTCTGTTTATTCTCCCTTTTCCTTGTAGATTGTCACCTCATGTCTAACG[C/T]CCCAAATTTTTTTAGTATTTATTTATTTATGTTGTGACAAAATAGTTTACCTGTTTCAGT			C	T
1311	TM1311	A1	40464769	0.965	GAGGATGGGCTCAGGGATAGTTTTCGAGTTCTAATAGTTCCATGTTGCATTGGTTGATAA[T/G]GCGAAGATTGCCGAGGAAGTGAAGCACGCTGAGCGTCAGAATCATGAGAAAGAGAGAAGT			T	G
1312	TM1312	A1	40469076	1	AGTGATATGGAGAGAAAAATGTGGAGGGAGGAGTTGTGATAGAACCGAATTAGGTAAAGG[T/C]AAATTCGGACACTCTTCCTCTTTCTCTAAATTTTCTCTGCTGTTGAATTTTTCCCCTTTT			T	C
1313	TM1313	A1	40471270	0.965	CATTATATATGTGTTCATAAGTGCTTACACTAAAAGTGAAATGGCATGATTCAAGATGGT[T/C]TGGTATATGTAAAGAATGATGTTTGAATGATTTGGTTAGTATGCCCTAATGATATGAAAA			T	C
1314	TM1314	A1	40481705	1	GGGACACATCACACTTCAAACACTCCTCGGGTGTGCATGACAAATTATCCAGCACCCACG[C/T]AGTGTTCTCGAGCTAGAACTCAGCTCTTTCAGCGTCATCATCAACTTTCGCTCTGAATTC			C	T
1315	TM1315	A1	40485136	1	AACCACTATTCCAGCTAGACCCTATTTCAGGATGTTACAGTCGCAACTTCGATCGACTGT[A/G]AGTCTTGTCACAACATCAAGTAGCCTGAGGTCATGACATGACAACCTGTTTGACGATGCC			A	G
1316	TM1316	A1	40490982	0.988	TTACAATCGACCATATTTCAGTAATTTTACAAATTAAGGATATTTGGGTAGTTTTATAAA[C/T]CGGGGGTACTTTGGTAATTTTACAACTGGGGGTATTTTAGTAATTTGGTAAACTAAAGTA			C	T
1317	TM1317	A1	40496774	1	ATAACAAAATATTATAAGCTGCCTTCAACCGCTTCCATACTCAAGGCCCAAAACTTCTTG[G/T]CCCAAATTCAGGGTGTTACAATAGCTAAACACACACACACATACACATACTGAAATCAAA			G	T
1318	TM1318	A1	40498975	1	TATTGATGCATAGTTCTAAAAGGTGGGTTTCTAGTTAAGCTAGCTACGCTTCTTAGCCTT[C/T]TACTAACCTAACTAGATGGCAAGACTACTCACATCTCAATGATGCAGTACAGATTGGGGT			C	T
1319	TM1319	A1	40502656	1	TGAATTCAGGAACTTCATTGCATGTAACACCCCTTACCAATGTCCGATACCAGGACAGCA[T/G]ACGAGGTGTTGCTGGACTAAAATATAAACCTACTTACAAAATCGAGCCACAAAATTTCTT			T	G
1320	TM1320	A1	40514830	0.988	TTGTTGCTGATGCTCTAAGTTGAAAATCCCTGTTTGCTTTGCGTACAATGAATGCACATA[T/C]GGTTATGTCAGATGATGGTGCAATAATAGCCAAGTTAAAAGCAATACCATAATTTATTCA			T	C
1321	TM1321	A1	40522619	1	CGAGCACATAAAGCTGAATAACTTAGCAAAGCAAAATGAAAGGCAGATTCTGAAGCCCGA[G/A]GCACGGGTAAATGAATGGTGGGAAAATCTTTTTCTTCTCCGGCAAAGAAAGCTTAGGAAT			G	A
1322	TM1322	A1	40530576	0.988	GGCCTTGAGCATGGGAGCGGTTGAAGGCAACTTATAATATTTTGTTGAGCATGTAATTTC[G/A]TTAATGAAGGCTTGTTTTAGTGGTTAAGTGTGCTGAGAAGTGTTGGAGAAGTTCTGGGTT			G	A
1323	TM1323	A1	40533247	0.965	CAAAAATAATATTAAAAAATAATTTTCTGACCTTGGATTTATGGTTTCAAAACCACTATT[C/A]TAATTTAAGCTAAAACCGGGTAGTTACAACTCTCCCTCTTTAGGGATTTTCGTCCCCGAA			C	A
1324	TM1324	A1	40538255	1	ACATTCACATTGTTCCTTATAAGGCTGTATGAGGCCTTAAAACATGTTTAGAAGAGGCTC[G/A]GGACTAAACCGATAATATTTGAAAACTTTGGAAAACTTTGAAAATTTTCAAACATTTAAA			G	A
1325	TM1325	A1	40557419	1	CAATTATTCACCACCATTCTTAGTCTACAGTTCATGCTAATCAACCCAAATCTTACCTTA[C/T]GAAAATCGGTCAAAGAACCCCTAATGGCCATAGTTCACTTACCTTCACAAGGTCTAACGA			C	T
1326	TM1326	A1	40562869	1	TATGGATAGTTGGAGTGTTTGAGGGAGTGGGAGTGTGTAGCTGAATTCTAGGAGAAGATT[A/G]TGGAGAGATTTTAGGAGAGAATTAAGGGAGCTTGAGGGGTGAGTGAGTAGTGTGCCGAAT			A	G
1327	TM1327	A1	40565677	1	GATGTCTGAAAGCCCCGTACGAACCATAGGAATAGTTAGGATACATATGTCATGGCATAG[G/A]ATTTCGATATGTGATTTCGTGTAAGACCACGTCTAGGACATTGGCATCGATTTTAGATTT			G	A
1328	TM1328	A1	40576765	0.996	TGCCCCCGTAGCTCCTCAAGGAGCAAATATGGCTAGGAGAGAGAAACCTCCGGTAGATAA[G/T]ATTCGAAAGCAAGGGGCCGAGGATTTTAGGCTAATGCTGATGACGACCTGGAGAGAGAAG			G	T
1329	TM1329	A1	40582643	0.965	TTTGAGGCTTAATAAATATCTGATAGCTTTCCAAATGGTTTAACGGTGAGGGATACAGTT[C/T]AAGTTAAACGAGAAAAGTATAACCATGCTGTGAGTGGTATAGGTACCTATTTGAAATGTA			C	T
1331	TM1331	A1	40589082	1	AATGGAACTCAAGTAAAAGACTGTCAGGAGGAGTTTGAGTTGCTCAGGTGATTGAGTAAT[G/A]AGGGGATAAGGGAGAAGATTTAGGAGCTGATAAGGGGAGAAAATCAAGGAATCTGAGTAT			G	A
1332	TM1332	A1	40594557	1	ATGAATTTTAGGTAAGTACCTGTACCATTCACAACATGGTCATAACCTCTCTTATTCCGA[C/T]ATAAATCATAAATTTCCCGTTGAACCATTTGGAATACTACTGGATATTCAATAAGCCTCA			C	T
1333	TM1333	A1	40607979	1	TTTAAGCTCCATGTTAGTGGTTATTTATACTTTTATGTCAACAACTACATCTACCGTTAT[A/G]TTTGTTTCTATGTCAATTGCATTGAGGACACCTTCGGGTATGTCCAGTTTATCAACACAG			A	G
1334	TM1334	A1	40613378	0.935	ATAATCCCTTTTGCACATATACTTAAGCCCTCAAAAGGCACTAAAATCAAACATAATCTA[A/G]CTTTATACATATAGTATAACCACACTCAACCAATATGCACATAGGCATCTCAAATAACAA			A	G
1336	TM1336	A1	40649234	0.976	CATATTTCCAGCACGTAGCGTGCGGACCTTAAGTCCGAATATAATTCCAGCACATAGCCT[A/G]CGGACCCTAAGTCCGGATATATTTCCAGCAATAGCCTGCGAACCCTAAGTCCGGATATAA			A	G
1337	TM1337	A1	40653895	1	TGATTAAATTTATGAATTTTTATTATTATAAAGCAAGAATTGCAAAATCCAGGCCTAGAC[C/T]GGGGAAAAGCAAAGCAAGTGGACTAAACCGAATGAATAGCCTACATTTTGTATACCGAGG			C	T
1338	TM1338	A1	40661163	0.965	CTAAAAGGTAACTTTTACCTTTTATACGATTTAGTCCTTTTTCGCAATCGGGCTCACAAA[T/C]GTTAAAATTGACTAACCAAATTTTTCATGCACTAATATAACCATGTTATAACCTCGTATT			T	C
1339	TM1339	A1	40665301	0.976	TGATTTTCCCTTAGAATTGGTGAATTCGTTGCTCCTAATGCTTTAATTTCATGTTTTATA[G/C]TTAGGAGAGCATAGGAGAGCGAAAGGAACGAGAAACGGGCCAAAATGGAGATAATGGGCC			G	C
1340	TM1340	A1	40676153	0.935	TCTAGGGATTAGACGTTATTAGTCTTGAATAGGGATAATAACATAACTTAGGGATATCTA[A/C]AGAACAAGTTAAATGAATAAATCATCCGATTCGGAGCCAGAATAACAAGTACAATCTAGG			A	C
1341	TM1341	A1	40679839	0.996	CCAAAAACTTTAAACTCGTAAATATTAAATATAATATTTACAAACTTATTTGTCAGATTT[G/C]GTGGCCCCAAAACCTTTGTTTCTGACATCCCTGAAAAAGGGCTGTTACACCGTGCAAATG			G	C
1342	TM1342	A1	40687182	0.965	CACTCGCTATCACATTCCTGAGGTTCTCAATCTTGCAAGGAAAACATCACTTTATCTTTT[T/C]AATTTAGCTAGATTCAGACTTCCATCAAATAAGATTAATCATGTAACCAACACTCACAAA			T	C
1343	TM1343	A1	40690953	1	AGTGTGATAGGATTTTCGGCGATCTCCAACCCGAGTTAGCTTCATAACCCTATAAGACAT[G/A]GGAAAATAATGAGGGTAAGCTATATAGCTTAGTAAGCCCATACGAAAATAATAAGCAACT			G	A
1344	TM1344	A1	40709145	0.988	TGTGGTGGTGATTGGATTTGGGTTTTAAGTCTAGCAGACTTAATGCCGATGATTGGAGTA[A/G]GATTATGATTTTGAATGTTCGTAGTAAACTACCATTGAATATGTTCAATACATTAAGTTG			A	G
1345	TM1345	A1	40719235	0.996	CGAAAGTAATCCACTAGCCCATGGGGAGGTGAAAACCTCACGAAAGCATAGTTTCTTACA[C/T]CCACTTAACAGGTATAACCACAACGATCATGCGATGCAATGCAATATTATTCTACAAGAC			C	T
1346	TM1346	A1	40721760	0.988	ATGTATGATTATGCTAAACCTTCTTTTAACAGGAACTGAATCGAGCATAGTTAAACCTGC[T/A]ATAACAGCAAATACTTTTGAACTAAAACCTAACACTATTCAAATGATACAGCAATTTGTT			T	A
1347	TM1347	A1	40725937	0.915	AAAGAAAAAAGGAAAATCAAAATAAACAATACAATATTTCTCTTTTATTTCCATTTGCTG[C/T]TGTTCTGCCTCGTTTGTTTGCAGGTACGAGTACAGGACTGTGCGTTGGCCCTTGGCGCGA			C	T
1348	TM1348	A1	40737439	1	CCTTATCTGCTCGACCCACACCGGCTTTACTTGAAGCTCAACTAACAAGCTACCATCATC[T/C]AACAAACTTAAACAGGCAAGCATAGCTCTCAAGTCTGTCTAAGCCCTACGACTCAACGCG			T	C
1349	TM1349	A1	40743587	0.996	TTTTAGTGGCGTCCAACCAATATTTTGCCACAATAGGAGACACGCCAGCCACGCCCTTAA[C/A]GATCTCAGCCCCATTCGATCAAAGTCGTTCTAGAATGGACCCCCGATTTTCGTTCCCATT			C	A
1350	TM1350	A1	40745819	0.949	GCTACCCTCATCAATATTGTCTCGTCCAATCTACCGAGGAGGAGGCCCTCGAGGACATTA[C/G]TGATGATGTCCCCCCACAGCATGAGGACCCACCGTCTCAGCCACCACCAACCTCTCGTCC			C	G
1351	TM1351	A1	40757613	0.996	GTTTCATGAACAGAGGCTTGCGCATTACTTTCAACCTCATCGAAATCGGCTCTGTTGGAT[G/A]ACATCTTATCTATACAAAAACATAGTTTGATTTGAGTCAGAAGATATCACATTATCACAA			G	A
1353	TM1353	A1	40774266	1	ACTTTTGATTTCTCTCTTGAAATGGGGGAATTGGCTTGGGTTTTCTCTGTTCCATTGACC[A/G]AATAGTTGGTTCTTTCCCATCCTCCTTATTCTGTCGACTTCTCTTCTCTTAAGCAGTTGG			A	G
1354	TM1354	A1	40780920	0.976	ACCAAAAAGTATTGATAGTGTGGATAGATCTCCGACGATCTCCGAATCCCAAGCTGGCCT[G/A]GTGACACTATAAGACAAGAGAAAGAAAAGAGAGTAAGCGTAAAGCTTAGTAAGTAAGTAC			G	A
1355	TM1355	A1	40785054	0.965	TTCGAGCGATTTCCTTTCTGTTTAGATATGGTCCAATGCACTTATAACGGGTCTTTCAAA[C/T]GACATTTGTACAAGAGTTAGGGTTTGTTTTCTAATATTTATCACGATTCAACAATAGTTA			C	T
1356	TM1356	A1	40787783	1	AAGAAGAACACGAGCAATCTCCGGTGGATCATCCAACACCTGCGGATCTCCTTTTTCGCG[C/T]AAAGCTTGTTTAGCTAAACAGTCTGCTACCTAATTTTGCTCCCTCGGAATGTACTGCATA			C	T
1357	TM1357	A1	40791358	0.965	ATAACCACATATATGGCATGAGGGATCTTTCGCGATACCCCTTCTAACTCTTTCAACGTT[A/G]CTAAGGACTCTTCCTTGTAAAATTGTCCAAATGAAAGTACGAATCCATTGAGGTCCGGGA			A	G
1358	TM1358	A1	40795498	1	CCCCGCCGAGAATATCGCTTCTCTACTAATATCCATGGCCCAAAATCTGCCTATTTTCCT[C/G]CGGTTCCGTTAGCTGAAGAGACGCCGTCCGACTTGCCTTTATTTGTGTCACCTACCACCG			C	G
1359	TM1359	A1	40799437	0.965	AGACACCCATCTTTGGGGTCAATCTCATAAGGTTATAGAAACCTTGTTTTTGCTAAAAGG[A/C]TAGACATTTAAGAACTAATCGACATTTTGCCCAATTTCCTTTACAATCAACAACCTTCAA			A	C
1360	TM1360	A1	40803574	0.935	GTTGGGCTATGTTTTGCTGGAAAATTTTATTGCATAATCTAAAGATGTTGAACTTTATTA[C/T]TGCTGTTTAAAGTGTTGTTGATATTGTTCTGTATTGAGTGTGAACATGTGGTATAAATTG			C	T
1361	TM1361	A1	40818417	1	AGTTCACTTATGGATACGAACGCCCAAGCTCGTTGAGTTGAGTCCGAGTTCGCTTATGGG[T/C]GGGTTACATGGTAGCTTGGCTACATATGTGGCACTTATGTGCAAACTTTTCATGTATCCG			T	C
1362	TM1362	A1	40833298	1	AAAAGGTCTTCGGGGAGATCCTTTCAACAGTAATCGAAGAAATTTAGAGATGATTTGGGC[C/T]GATCTAGAGACACATTGGGTTTTTCTAGACGAAACTGTGATCGACCCCCTGTGAGTGCAC			C	T
1363	TM1363	A1	40847043	1	GAATAAATATGTCCAATGAGAATTGCAACTGCTCAGACATATCAGATAGCTAGATCACTT[C/T]TAATCAAACGGTGGGATCTGAAATTTCTAATATGCCCTCATTCTTAATGATTCATAAGTG			C	T
1364	TM1364	A1	40851699	0.988	AATTCCCTTGTCTTGGATTATAATTGCCTTGAGTAGATATATTCCCATATCGAAATGTCA[C/T]AGCATTTTGTCCAGCAGTCTGAGTTTTCCAAAATTGTTGATTGCGTGTAAAATTATTATA			C	T
1365	TM1365	A1	40875330	0.965	CGCGGGCCAATAGCATGACCGTGTTGAAATGTCACATGGGCGTGTTGCCCCTCCCACACT[G/A]GCGTGTGCCCCTATTTTAAGAGTTATTTTTAGAGTTCTTTAAAGGACTCAGATTGTTTCT			G	A
1366	TM1366	A1	40877611	0.996	ATCCAACCGAGCTAGAGCTGAATTCGAGGAAGCTGAGAACATTGCTTCAGCTTCAGTTCG[C/T]CAGCGTCTGGTAGTGAAAGGCCTATGTCTGAGCGTCGAAGTGAGGAGGCAAAACAAACCT			C	T
1367	TM1367	A1	40891622	1	CTAATGTACATTTTGGGCCTCATGAGCCCATATAAGGGACTTTAAGCACATGAATGAAAA[G/T]TTTCAAATTTGGATGGAAATTCATGACTTGATCTTGTATGATTGTACGAGTTTAAGTTCG			G	T
1368	TM1368	A1	40897012	0.988	TCATCTGCAATTTATTGGTGGCTTGTCCACAAATTGGTGTGTTATTGGATGGAACAAGTT[C/T]TGGGGAATTGTTATGGTGTGTAACAGAGTATAGGTAGGAATTTTTCCTTAAATGCACAAT			C	T
1369	TM1369	A1	40902422	1	GTTCACTCAGTTAGCCGATTTTGAGCCTGTTCAAAATGCCACTCCAATCAGTCGACATCA[C/T]GGGTTTGACTTTGATATCAATGTTATATGGGCAGATTAGTCAGGCTGCATAAGGACATCA			C	T
1370	TM1370	A1	40907148	0.988	GTTGCTACGACTAAGTATTTCGAGATTCTATGGAGATGCATCTACTGCATTCACCATATC[A/G]CCATTAACTTTCACCGAGAATACAAGAATAAAGACTAGTGCAAACAAGTCGTGAACATGG			A	G
1371	TM1371	A1	40911274	1	CTAGTTACGACTCCTATTATAACAAGCCCAAATTAGAGTGAACTTGTAACACCCCACACC[T/C]GTGCCCTACGCCGGGACGGAATATGAGGCATTACCCCAACTTGAACTCATGCATACGAAT			T	C
1372	TM1372	A1	40916891	1	TTTGGCTAGTGTCGATTTAAAATGGGAGCTTGTTTTTGATGCAGTTCCACTGAAAGCTTC[C/G]TCAAAGACTGTCCAAAATAATACAATGATCCTGGAAATCAAACTTTTAGGCCTGAGACTA			C	G
1373	TM1373	A1	40923334	0.965	AACTCATCAAATCCTATTTCAAACTCCATATCATATGACACTGCCTAATTTGGCCATAAT[A/G]TCTAGGCCAGGTTTGGGGTGTTACAGATGGAATATTCATATATAACATTTGTTACATGAC			A	G
1374	TM1374	A1	40926348	0.988	ATCCAAACACCAAAATTACTAGACCGAATTTCAATATGAAACTCTAATAACCTTGTAAAT[A/G]TTACTTAATATTTATGGGCTCACACATCGAAATTGTGGTTCCGAAACCACTAGAAAATGG			A	G
1375	TM1375	A1	40935049	1	CAGTCTAAGAAATCCAGACACGTCTGCTCTCGTTCCCACGCATCAGTGGGACACTCGCAA[C/T]GAGATCATAAGAAGCAAGATTCAGATTTTAAGTCCCGGGCGACATCAGTAACGAGTGTAG			C	T
1376	TM1376	A1	40944088	1	CATAATATCACTGTCTTAAGGGGAAAAAATGACATCAGGGGTAGTGTTTGTCCAACGAAA[G/A]CACCAATCAGAGGAGACCTATTTAAGGGCATTTTGGTCACAAAATAAGGGTACGAAATTG			G	A
1377	TM1377	A1	40950189	1	TAATTAAAAAATTTATTAATTTCTCTAGGTGTATGCCTCTATCATTTGGCGATAGACAAT[G/A]AGTGTCTCCCACTTGCCAATACCAAGACACATCTACCATCTGAAAATGTCACGTTCAAAG			G	A
1378	TM1378	A1	40963258	0.965	ATCTAAAGTTGGCTAAAAAATAGGATCTATAAAAATTGGTCAATTAATCATAATGTAAAT[G/T]ATTGTCTTTTTGCTCTCATAAGAGCATTTATATCAGAATGCACCACAACCAACGGATAAA			G	T
1379	TM1379	A1	40972322	0.988	TGAATGGCTATAAAAGTTGAACGAGCAAATATGAGCAAGAATCAACAAAGTTATGATATC[T/C]GAAACTCCCGTACGAACCTTAGGAATAGTATAGGATACAAATGTTATGACATTAGGATTA			T	C
1380	TM1380	A1	40975774	1	GTTCGACTAGGCTTGGATCTTGATGAAATTGAATAGATTCCATTGTATGAGCCTAGGGAC[T/G]AAAATGTAAATATGTCAAAGTTTAAGGGTAAAAATATAACTTTGCCATAATGTAAGTTTT			T	G
1381	TM1381	A1	40978709	0.949	GAACTTTCTTGTTTTGCCTCCCACTAACGGAGTGTCGGGTAGGGGTTGTGTCTTCGTCTC[A/G]AACAGCAGTAGATGAGTCTGCACCATCGCCTCAAAGCTGCGACCACCTTTAATACCAAAT			A	G
1382	TM1382	A1	40983901	0.965	CAAGTAACTATTCTAAACACTCGCCAATTATGCTTTTTCCGAAAAGTCGAAAGCTCAAAA[C/T]AGCTTTTCCTTACCTTTATCTCTACTCGTAGATGGTTCTATAGAATCCAAAACTTCAACA			C	T
1383	TM1383	A1	40998990	1	TACCAAGTCATGGCTTCGGGTACTACTCCACACCACAATCATCCAGAACTTACAGGTTTT[G/A]TAATCCTCAAGTATCACAAGTAAATGTCAGGAAAACAACAGTCCCAGCTAACAATTAGGA	Gh_A01G1088	intron	G	A					A01	40994773	40999830	-	AT3G57520	seed imbibition 2	Q94A08	RFS2_ARATH Probable galactinol--sucrose galactosyltransferase 2 OS=Arabidopsis thaliana GN=RFS2 PE=2 SV=2
1384	TM1384	A1	41003214	1	CAATAGTCGCACTTTATTACCAGAATCAGAGTGGCCACACTGAATTGGTTCAGTTGTTTG[C/T]TAAGTTAGCTGATGTAGAGCCAAGTGAAGATTTCACTTCATTAAGTGAAGAACATGAAGT			C	T
1385	TM1385	A1	41006098	0.988	TCAACATATTTTTTAAATGTTCTGAATACTTCCACAAATTAATTCGAAAAGGTAACGTGT[C/A]TTTTCGGAATACAAACACAACATACGAGCTAGAACACCATTTCAGGCAAAGGCTAACCAG			C	A
1386	TM1386	A1	41010954	1	TGCCCGTGTGCCTTGGCCGTGGTCGAAACTGACTTGGGTCACACGGCAAGCCACACGCCT[A/G]TGTGTCTTGGTTATGCTCAAGACTGACTTAAAATCGTAGGGTACCCCAAGGGACACATGG			A	G
1387	TM1387	A1	41017874	0.976	TGTTGAATAGCCAGATTAGTTCTATTGTACTGATTCATCATTTGAGAGAAGGCTTGTCTA[G/C]CCTCTCCATCATGGCTACTCGTAGTCGATCTAGAATCGGATGACACTGTCCCTTGCGCGG			G	C
1388	TM1388	A1	41022750	0.988	TATGTGGACAAGCCACCATATATTGCAAATAAACTACCAAAAATCGTGGTTCAAGCACCA[G/A]AATGTGCATGTCATTAAACTGTCATAATCATCCTCCTTTCAAAATCATCCCAATCCCATG			G	A
1389	TM1389	A1	41026179	0.996	TCGGCACCGTAGTTTAACATCCCTCCCCTATTAAAAAATTAATTTTTTAAAACATATCAT[G/A]GGCTAATGATAGAGGCATGATTGGGCAGAAAAAAATGGGTGGTGTCGCCACCCCTTGTCT			G	A
1390	TM1390	A1	41029946	0.996	TAAAGGCGCATTTAACAAAGTCAACCACAAAGGCTCCACTTTAACATATTTTCCAAGAAG[C/G]CACATGCACAGAGTCAGCAACTAAGGCTCCATATGACGGATATCATCGTAAGACTCACAT			C	G
1391	TM1391	A1	41034539	0.965	TATGTCAAGTATCATTAACACCATTTCATTTTTATTTCGTGATTTAAATTCCATTTCCAA[T/A]AAATTGAACATCACCTGATGAAACTATAGTAAAACAGGCTCGGATACTGGAACGACGGAA			T	A
1392	TM1392	A1	41049327	0.988	TAGACCTTTCATCTTGCAATCCGTGTGGCCTTAGGGGATTCACTCGTCCAAACTCCCTAA[T/G]TCAGTCTTTACTTAAGTAAGGATTCTTTAAGAACTCCTCCATGGCACCAATTGTAAAGCA			T	G
1393	TM1393	A1	41053422	1	GGGCGTGTGAGATCTCCACACAGCCGTGTCTCCTCTACTCTTAATTTTTAGCACTTTTGG[A/G]CGGTGAGTTACACGGCTGGTCACACGGGCGTGTGTCCCCTACACATGGATGTGTGTGGCC			A	G
1394	TM1394	A1	41061495	0.965	AATCCTCTTCTAGGGATATAGACTTTCGAATGGCTAAAATAGCCCAAAATTAGCCTTTTC[C/T]GAATAGAACTAGACTTGGGCTCGACAGGGACACGTCTGTGTGCCACGTTACTGTGCAAGT			C	T
1395	TM1395	A1	41067228	1	CATCCTTACCGTTACTTACCACAAGTCATTGCTTCAGTTCTGGTTCAGGTTCAACTAACC[C/T]TTCTTCATCTCGAATAGTAATCATATGAAGTTGTTCCCTTGGGTTAGTTTCAGTGTTACT			C	T
1396	TM1396	A1	41069866	0.996	CACGAGCATGTGGTCTACTCGTGTGTTACACACGGGCGTGTGGATCACCCGTGTGGAAGT[G/A]CCCAGGCCGTGTGAAACACTAATTTAGGCACAATTTGTCCGTTTTTGGCCCATTTCTTGC			G	A
1397	TM1397	A1	41084490	0.988	GCTGAGGCCCTGAGTATCTACGTTTGGGTCCTTCCATGTGCAACTACGCACGTGTGGGTC[C/T]CTAATCCCATCTTATGTGTATGCAATGTGTGAATTTTATCCCGTTCTTCCACATCTTGTA			C	T
1398	TM1398	A1	41593440	1	AAGATTAAAATCGGTTTTCTAAAATTAGGTTTTCTTTAGAAGGTGGCACACCGAATCTCC[A/G]GCCCAAGTCTATAAGTTTTCTGAACCTTTCTGATTGTTTCTGAAATATCTGTTATATGCT			A	G
1399	TM1399	A1	41741334	1	TAATTCAAGTTTAATGTGCTTATTTCAGTGGAGTAAAAGTCCCTGTTTAAGAGTAGATCT[G/A]GCATAATTGAGTGGAGTTGCATGCAATCCTAGAAATAGGACGACATGAATCTACTGGATT			G	A
1400	TM1400	A1	41748827	0.965	TGAAACAGTAACTAGAATTGTGTGAGAAACGAAAGTCTATAGTAGGTATATATGCCAAAA[A/C]AAAAAATTCTGATTCGGCCCATGAAAGCATCATGATGGTTAGTAAAACCAAGCTAAACCT			A	C
1401	TM1401	A1	41754975	1	TGACAATACTTGATTCAGCCTCAATCAGAGTGGGCTTAGCATGGTCATACATAGTCTGAG[G/A]AGAATGATGTGTAGTGTAACAGCCCGTTTTTAGTCAAATCAGAACAGTGGTTTCAGGACC			G	A
1402	TM1402	A1	41757506	0.988	GTATTATGTTACTCTATTTTATAGATTTTGGAGTCAAGTTACAAGCTGAGGGACTGTCAG[T/C]CAAGTTCTTCACACTATCTACTGTTTTGGTACCTTATTAGCTAAACTTAAATTATGGCAT			T	C
1403	TM1403	A1	41768555	0.965	CTTAGATCGGGGAAGGAACAAAGTTACGAAATCATTGACTTGTTTTGCTGTTTTAGCATC[C/T]GAGGTAAGTCTGTATGTAATAAGTTTCGCTATAAATGTACTTTCAATGCTCTGATATTGC			C	T
1404	TM1404	A1	41771462	0.965	GTCAATGTTGCACACGGGCTAAGGGCATAGGCGTGTCTCGAGTCACACGGGCGTGTGGAA[G/C]CCTAAGGCATGAACTTTTCCAAGTTTTTCTTAAGTTCTCAGCTTAAACTTAAATCATCTC			G	C
1405	TM1405	A1	41780534	1	TATAGTGACAGAACCTGCAATGCCCTTAAAGGTCGGAACTCAATAGTTCTAAGAAATTAC[C/A]AGAGGAGTACATCGTGCGCTTTTTAAAACACTTAACACTGACAGGTAACTCAATATGAAC			C	A
1406	TM1406	A1	41784751	0.965	AGCTAGGCTTGAAATACGAAGAAATTCAAAAAATCGATTTTCGAATATAGGGGTAAAATG[G/A]TCATTTTGCTAAGGCCTAGGGGCAAAATGGTTGTTTTACAAAAGATGTAAAATTATGAAT			G	A
1407	TM1407	A1	41789047	1	CGGGCATGTCCCTGCCGAGCCCAAGTTTAGTCCAATTCAGAAAAGGCCAATTTTGAGGGA[C/T]CTTAGGCATTCCAAAGCCTATTTAAACACCTGAGGAGACACTTAGACAGGGGAGGCACAA			C	T
1408	TM1408	A1	41800167	1	CAGGAGGGAGTAAGGAATTGCTCAAGGAAAGCCGATCGATCCATCTCAGAAGCCAGATTC[A/G]TTATCAAGACTGAAGATCTCCCTTCAAATTCCCCCATGAGTTTTGGGTTTTCTTATGTTT			A	G
1409	TM1409	A1	41805296	1	TTGATTACGAGACTACGAACATGTACGGCAATGATTCACCAATGATTTGGTATTTGAAAT[C/T]CCGGTTGAACCTTATGTATAATTTGGATACTAGCGACATGTCATTAGAGGATTATTGTGA			C	T
1410	TM1410	A1	41808621	0.996	ATTTCAAAAATATAAATTCACACAAAATAAACACAGAAAATAATTTTAAAATATTTTTTG[A/G]CTCAGATTCATGGTCCCGAAACCACCGTTCCGATTAGGGTCTAAATCAGAATGTTACATG			A	G
1411	TM1411	A1	41812826	0.988	TATGTGGTTCACATGGTCGTGTGGTCTGGCCGTGTGAAAAGGTGTAGCTCAAGTGGTTCC[T/C]TCAGCTTTCTCTGACGCTCTTATTTTTCCTCTTTTTTTGCTCCTTTTGCTCTCTTTGCTC			T	C
1412	TM1412	A1	41818042	0.988	TTAGTTGTTTCAGGCTTTTTATCCAATCCTAAAACTTGTTCCACCATTTTTGCTATCTCC[G/A]CCAAATCTACAAATTCTGTTATTCGAAGTGATACCGACTGTACCTTAATCTCATCTCTCA			G	A
1413	TM1413	A1	41824523	0.965	ATCACCAAGAAATAAGCCTTAGTCTTGATGGTTAAGTGCTTAGAATACTCCTTAGAGAAC[T/C]AAGGTTCAAACCCTACTTTTCCCATTTTCTTCTATTTTTTTTCAAGTAACTAAGGAACAA			T	C
1414	TM1414	A1	41827652	1	GGTGAGTAAGCGAACGCTCACTAGTTGGTTAGAATCGATAAGATGATGATCGAGAACAAT[G/A]GAAACGGTAAGAATGTGATTTTTGGCGTTCTCGGTAAGTTGGGCCTCGAGGGGCCGAAGT			G	A
1415	TM1415	A1	41832139	0.996	ATCGCACTTGGTCATCTTGGTGGCCGATGTAATCTCTCGAATTTGGGTCTACTGTCTTGG[T/C]TGGGCTAGGGAGGTTACATGATGAATGACTTAGTTACTATTTGTTAAGAATTGATTTTTC			T	C
1416	TM1416	A1	41860989	0.935	TTAAGAATTTTTGGTTTGGCCAATCAATACCATATTTTTCTTAAAGTTTCCCCTGTTTCA[C/T]TGTTTGACTAATCTGACCACTCCTCACTACGAATCAAATTTCTCATTTTACAGAATTCAA			C	T
1417	TM1417	A1	42051251	1	GTCAAGACCCAGCAAGACCGAGAAAATTTGGTCTCCCTTAAAAGTCTTTGCTCTATTCTC[G/A]TTACACAACAATGAGCAAAGAGGGGCAGCTGTATAGCCCAAAAATTTGCTCGGGTTTAAA			G	A
1419	TM1419	A1	43234016	0.935	GTGTGGATGACTTCGATAATGATCCCCAAGATCGTAACTTACACCCAAAATCTATAAAAA[C/T]AGAGTAACAAAACATACAGGGTAAACTAACTTAGCTTAGTAAGCCTTAAGCAAATTAAAC			C	T
1420	TM1420	A1	43483612	0.965	ACTGCCAATCTGCGTACTAGTCGCTTTAAAAATCATATCTTGAGTTCAGAAACACGGAAT[T/C]CAGTTCCATAAATTTTCCCTGAAACTAGACTTATATGCCCATCTACATATTTTTTTCTAG			T	C
1422	TM1422	A1	44627921	1	ATAGAAAGGAAGCGTGAAAGAAGGAAGAGATTTGGCCAAGGGAAAAACAATGTGGAAAAC[G/A]TTTACTTACTGCTCAACACAAGAGAATGAGAAACAAATAATTAGTTGGCACTGAAGGAGG			G	A
1423	TM1423	A1	44655284	0.988	AAATCTCTCAATGAAACTTGACTTGTTTCTGAAAAGATGTTACTGGAGGTGTGGCACACC[A/G]AGTCTCCGGCACCAAATTTGTGAGTTCTCTAACTCTGTTTACTATTATAGATTGAAATGC			A	G
1424	TM1424	A1	44697658	1	ATAAAAAGCCTACTAGTTCAGGGGATAGTGGTGTGTTGCTACTACAAAGGGGCTTGAGTT[T/C]GAGTCTCACTGTGTTCAATGAGTGTTTGTAACACCCCAAACCCCCCAAACCCGGCCCAAA			T	C
1425	TM1425	A1	44738997	0.965	TTCGAAAGGGATGTAAGGCTTATTTGGCATTTGTAAACCAATCGGAAACTAAGGATCTGA[C/T]AGTGGATAAAGTTAGAACCGTCAAGGATTTTCAAGATTTTTTCTAGAAGAGCTTCCAGGT			C	T
1426	TM1426	A1	44769612	1	ATTGTGAGTTCTCACCTATATGTATAGTGATTTTGGGCGTTGAGGATCTAGGACATGTTG[G/A]AGAGATAAGGAAATGTGAGCTAAGCTCCATTCAACGGGACATTTGAGGGGAAATAAGAAG			G	A
1427	TM1427	A1	44993552	0.996	TTCCCTTTACGAAAACAATTTTATGCTTGAAAGCTAAATTTCTTGCAAACGTAAAGAAGA[A/C]AGGGTATAGCCAGGGCATAATCACAGATTGGGACCTCTACCGAATAGTTGGAGATTCTAT			A	C
1428	TM1428	A1	45024572	1	TTCCTTTAAACCAAAAAAACATAATAATTATTCAATCCAAGAGATATTAAAGCAATTATA[G/T]TTCATACGAACTTACCTGGCTAAATTGCAGCAATGGCTAAGTACATGGGCTATTTGGTAA			G	T
1429	TM1429	A1	45334866	0.996	TTTCTTAAGCTCCCGGTTTAGCCCCAGACCATTCTTAATGCATGTTTTGGGTCTTGTAGG[C/T]CCATAATAGGGACTTTATGACGTTGCTTGTTTGGTTTTAGATTAAAATATAATTTTATAA			C	T
1430	TM1430	A1	45638164	0.935	CTACATTTAAATACTCAATTTGCATACACAACGCATATTATCATACCGAATCCATGTAAC[A/G]TATATAACATTTGTAACATTTCATTTACATTCATGTAAACAATAATATAATTATATAACC			A	G
1431	TM1431	A1	45649881	1	TTAGTGGCGCTTCTTCCACAAATGCCACTAAATAAAATGACCTTTAGCGGCACTTTTCCA[C/T]AAATACCACTAAAGAACACGACCTTTAGCGACACTTTGCCTACAAATGCCGCTAAAGAAC			C	T
1432	TM1432	A1	45764007	1	TTGTAGCTATTTTGACAACGAATGTGGCACACTGTAACTCGGACTTGGTGATTTGGTCGG[G/A]TATGGGGTGTTACAAATTGTTCTTTTTCAATGTTACTCGCGGAAACCTCGATAGTTTTGA			G	A
1433	TM1433	A1	45972819	1	GTTCGGCCAAAGCAAGAGTCTTCTCCAAGTTTGATCTCAAAGCGGGATTTACTTAAACAA[G/A]CAGGAATAGCACAAATTGTTCTGTCTGATGGTTCATCTTCCGTGGAGCAGACAGATTCTA			G	A
1434	TM1434	A1	46001772	1	CATTAGGGATTTCATGTTTCGGGTGCTATGAATGAGGTCTTACATTTGTTTCGGATTCTC[T/C]ACAGCTCGTGTGAGCAGCATCGTGTAGCTTATATTCTGACCTACAGCTCGTGTGAGCAAG			T	C
1435	TM1435	A1	46123681	0.949	ACTTTATTAACTTATACATGCCATTGATTTCCAAAATAAAATTTCTTGATATACCAAAAT[G/A]TTGAGGTCGATAGTGTGATGTGTCTCCGACCCAATCTGACTTCCGAGCTCTTAATACTCA			G	A
1436	TM1436	A1	46146818	1	GAGAGCATAGGATGGTGAAAAGAGCAAGAAACAGGCCAAAAATGGACAAATTGGGCCTAA[A/T]TCAGTGTTTCATACGGCCTGGGAACTTCCACACGGGTGATCCATACGCCCATGTGTCATG			A	T
1437	TM1437	A1	46258618	0.988	ACTACTAACAAAATCAATCACCCGATTAATCGTGTATCTGCCTGACTACGGATTCTATTA[A/G]AAGATTGAAAACATAAAAATATTTAGGAACCCAACACGAGAATAATCGGCTAACATCCTG			A	G
1438	TM1438	A1	46381483	1	GAAAATGGAGAAAATAGACCCACATGGGAAATCAACATGACTTGGACTTCCTCAAACAGG[T/C]GAATCACACGGCCTTGTCTCTTTGGCAGGATCGAATCACGACTTACACGGGTAGACTACA			T	C
1439	TM1439	A1	46400955	1	TTTGCTTCACATACAGTTGTTGCTCAGTATGCAGCTGTTGATCAGTCCCTAGAAATAAGA[C/T]AGCTTGGTTATCCATCACTCCCTATTGTAAACTAAGTATTAAATGCTTTTAATATTCAAA			C	T
1440	TM1440	A1	46450613	1	AGACAAGAACACATATCGATGCCAATGTCTCAGACGTAGTCTTACACGAGAACACATATC[A/G]AAAATCCTATGTCATGACATATATATCCTAGCTATTCCTACGATTTATACAAGGCTTTCG			A	G
1441	TM1441	A1	46496093	1	AGTAGCCAGAGAGTGTCCACGTGGGAGCTTTTTTCAGAAATTTTGCTAACAGTGCATCCT[G/A]CTTAAAGTGTTTTTGACACTATTTGTTTAGAAACGTCTACTCAGAATTATTTTTCTATGA			G	A
1442	TM1442	A1	46607591	0.996	CTACCTTGTGGTCATTCAGATATCAACTTGGCGAGTTGTCCAACCTGAGTTTCGAGCCCC[A/T]GGATTAATGCTTGTTGATTTTTGAGTGCTGTCTCGGTATTCTGAAAATGAGTTTCTGACA			A	T
1443	TM1443	A1	47082391	0.965	CTACTTCTCTCTGGTATTCTGTTATATTCAGTCTGATGGGAACTTATGAGAAAATGCACA[C/T]GATGCTATGATTTTGTTTCTCTAAATTGTCATATTTGATTCCAGTGGGATTAAATGATAC			C	T
1444	TM1444	A1	48371645	1	GAAAAGAGTAAACAAATGCTAAAAAGATGAGAATGGGTGTCGAAAATGGAGTTGGAGGCG[A/G]CGTACGGGTGTGGCTGGGAGGTCGTGTGGATTTGCAGCGGCTAGGGTTAGAGATTTTGGG			A	G
1445	TM1445	A1	48556752	1	TTATGTGGCGCTACTTTGCCACTAGACCACAAGGCTTTTTGTGGCACAATTTATGCAACA[C/A]TATTCTTAAGGCCTACCTACTACACCTAGGGTTTGATTCACCTTAAACCAAAATTTTTGC			C	A
1446	TM1446	A1	48917663	1	AAGGATAATAGAGGACTTGGACTGTTCACCTGAAAAAAACTTGAAAGGGGCAGTGTCACT[G/A]CTTAGGGAAGAAGCTTACCAGTGCTGGCTGATAGTGAAAGAGGGCACCTAACCTGAGCAG			G	A
1447	TM1447	A1	48925981	1	GTGTTGGCTGTGTGGCCTAAGCCAGAATGTTACATGGGGTCGAACACGAGTTGGGACACG[G/A]CAATGTGCTTCCATTTTGAACATCCACACAGTCTATGACACGGGCATGTATGGCCATTTT			G	A
1448	TM1448	A1	48960739	1	AGAAATTGGCCAAGAATAAGGGGAAATCGGTAGCACACTTGGAAACTTTTAGGGACTACT[T/C]GAAACCAAAAGAAGAGAAAACACAAAACGTGTATTATCCTGATTTTGGGCCTAGTCGGAA			T	C
1449	TM1449	A1	48989958	1	AGTATAACATGACAGAAAGGGCCTACTAGTCTAAGGAATAAGTGGCGTGTTACTGTTACT[A/G]AGGGTATTGGGTTTGTGTCTCGGCGATGCAAAGGAGTGTTTATTTTGCTGCTGATGCTGT			A	G
1450	TM1450	A1	49136938	0.988	TTTTCATTTTGTTCATTATTCTATAATTTAAGTTGTTAGGAAAGCCTCATTCTATTGTCA[T/A]ACCCATGCCATTACTATGCTCATTCTCATGTTATTACCATGCTAATGTCACGAAATTATG			T	A
1451	TM1451	A1	49140627	1	ACACAAAGAGAAGGAGGTAGGGAACTGCTCAAGGAAAATCGATTGATCCATCTCAAAAGC[C/T]GAATTCATCATCAAGATTGAAAATCTCCCTTCAATTTTCCTTTAGGAGTTTTGGGTTTTT			C	T
1452	TM1452	A1	49180537	0.988	AAACCCGCTATTAGGCCCAAGTGGGCCTACACGCTCGTGTGGCCCATTTAGTCTAGATCA[T/C]ATACAATAGCGCAAGCCTTATAAACCAGCCTATCAATGATCACTTATCGAGGATTTTACC			T	C
1453	TM1453	A1	49338225	0.915	AAACCCAACCCATATCCATCCGTATACACCCCCGTGCCAACCTTACACCATGTGGGGAGA[G/C]TACTCGACCCACCCATCCGCTACACGTGACAAATTTTGCAGCATGGCTGTGAGAACAAAT			G	C
1454	TM1454	A1	49409345	0.988	AGGCATTATCACCTGATGTTATCACTGGTACATTTTCTCTTTACGACCCTAATGTGATTG[C/T]ATTGATTGATCATGGATCAACTCATTCGTATATCTGTAAGAATTTAGTGTTTAGTAAGAA			C	T
1455	TM1455	A1	49427181	1	GGGGATACATATCGGAGAGACTCTGGGCCAACAGAGCAGAAGTTTTTACGGGCGTATCTG[G/T]AGTAGCCCCAAATGTGGTTGAATATTGGCTAGAGGCAACAGAGCGAATCATGGACGATCT			G	T
1456	TM1456	A1	49520222	0.965	AGAAAGAGTTGATCACAAAGGATGAAGAAAGAGGAAAAAGAAATCAATAGGTTTGCTAGG[T/A]GAATTCGACATAGACAATATGAACCTTCGGGTTTTCAGCTTTTGTGATATTCGGCTGTAA			T	A
1458	TM1458	A1	50253421	1	CCACGAATAAGCTATAAAAAGCTCAACCAACCATGCACACTACAGAGGACCTCGAAAGGC[T/C]CATCCAACCCTATACACCATGTATGTGGACTAGGCCACTTAGATGATAATATGCAGCAGA			T	C
1459	TM1459	A1	50455190	1	TATGAGCATTCCAACATGGCCGTGCTGATGGCCCGTGTGTCTCACATGGCCTAAGCAAGA[C/T]AGGGACGTACCCGTGTTCTCCACCCATGTGGAATTAATTCTAAATGCACACCTTCAGGGG			C	T
1460	TM1460	A1	50763814	0.996	CTTATAGGGTGGCATTATGGCCTTGCAAATGGCCTATTTTTTCCCACATGGGTAGGGACA[C/T]GGGCGTGTGTCTCAGCCGTGTTACTCGAAGGCCATTTTGAAATGAGCCTGGGCAGACCAT			C	T
1461	TM1461	A1	50797987	1	GTTCGCGTGACTGTCCACCATTTAACAGTTCGCGAGGTAGTCCACAGATGCTAAATGTAT[A/G]TATGAGTCCACCAAATCAAATTGCTATAAGTCTATCCATGAGATGTCTTTACGTAAGGCA			A	G
1462	TM1462	A1	50883169	1	TGGTTCTATCGTTAGATGAGCAGGTTGTTAAAAAAGGCTCGTTTTACTCTTGACTAAGGG[T/C]TGCGTAAAGGCTTTAATCAAGTTCTCTTTGGGTGGTGACTGTTAGTTACCGTGTTCGACT			T	C
1463	TM1463	A1	51039413	1	GGATGGGATTTAGCTCAAATAAGTAATTCCAATGACCTTGTTATAAAAAGGATTTAGCCC[T/G]GATGGGTAATCCTGACATAATACCTCTCGAGCACACATTATGATTAGGGTTTAGCCTAGA			T	G
1464	TM1464	A1	51219558	0.949	ATTATGTAATCTGGGTGCTGGTCCTGTACGTCCTACTGGTGGCTGAGTATACCGGTATAT[G/A]TTGCGGTTGTAACACCCCTAACCCGTATCCGTCACCGGAATTGGGTCATAAGGGCATTAC			G	A
1465	TM1465	A1	51490330	0.965	ACTATTAAGGTTACATGGGTCACCCGAGACGACTTTGGACCTTCTGTTGGGTCGGTAAGC[A/G]TACCTGGACCCTTAATCGATAGAATAAATGTTTTGCCCTTATGTGGTAAAATGACTGTTT			A	G
1466	TM1466	A1	51642294	0.988	ATACTTATATGCGTAAGCTCGAAAATCATAATATAACATCACATATATATATTACCTATA[C/T]GGCCGAATATACATGGTCACACATATGCGCATAGTTAAGAATCATTTCATTGATACTCAA			C	T
1467	TM1467	A1	51776953	1	TCCAATCATGACTACCTTCTTATCCTCCTCAGTCCTTAGTACGACCCTCTTAGTCGTACA[G/A]CCCAAGCTAATACGATACTTAACCAACTAGTCTATCCCCAGAATTAGGTCGAACTCCTCA			G	A
1468	TM1468	A1	51921148	1	TTCAGTAGCAGTGCAGTCTCAGCTAGGGCCTTAGCCTATTACAATATTAGTATTAGTGTG[T/G]GCCTTACCCCATTTTAATAACAGTAATAGAAATGCAATCAGAAATCCTACCCATCCATCC			T	G
1469	TM1469	A1	51993517	0.965	CTTCCTTGAATGATTTGGCAAATCATAAGTTGTTAGAAGAGAGATCACATAGGCAGAGAA[A/G]AAATAAGAAGAAAAAAGAGCACTTACCGATTCGTCAGAGAACCCTTACTAACTAAAATAA			A	G
1470	TM1470	A1	52013757	0.988	TACGACAGAGAGGAAAAGAGTGGGAAAACTAAATAGTGGCAATTACCATAGAGATCGACA[G/A]AAAATAAGAAGAATTCGGCACAGAGAGGGTAGATGAAAGAGTGATTTTCAGCCAAGCCCC			G	A
1472	TM1472	A1	52390975	0.988	GTAGCCAATTTGCCACCCTAATTGGGTCAAACCTACAAGTAATAAAACAAGCATATTTGC[A/G]CACCAATTTCAGCCAATCTCAATACGAAAACATACATTATTCATGACTTATCATTACCAA			A	G
1473	TM1473	A1	52415672	1	GTCCGTTAACACCTCATGTTCGAGCTACGGGGCGTTACAATTTTATTGGTATCAGAGCTA[C/T]GGTTTAGTTGATTCTAGGACTACCGTAATACGTTCGGGTCTAGCTATACATGCCATTAAG			C	T
1474	TM1474	A1	52430418	0.976	CGCATGAGAACGCTCATGGCTATCTCGTTGACCATGCAGTCATGTTTCGTAACACGGCTT[G/T]TCACACGGGTGCCCTCACGCCCGTGTGGTGTCAACAACCCATTTTCTGACTTTTCAGCCT			G	T
1476	TM1476	A1	52653782	0.915	GTCAGAGATTCATTGATCAATAACAGAAGGAATTTCTTAAACTTAAACAAGGTTCCATGT[C/T]GGTTACCGACTATGAACGAAAATTTGTAAGGCTTAGCCGGTGCGCGCGGGAATGCATTTC			C	T
1477	TM1477	A1	52702355	0.965	TTGAATTTTGTACAAGGAGAAAATTGATTTGTAGTGAAGAGTGGTCAGAATAGTTGAGCA[A/G]TGAAATAGGGGTAACTTCAATGAATAAACTGTGCTAATTGGCTAGACCAAAAATTCTGAA			A	G
1478	TM1478	A1	52961403	0.988	TGGAATAGGTTAAGAGGCATTACCGGACTTATAACTCAAATCAGAACCACCATACATCAA[T/A]TATCATCTCATTACTAATAAAATTCATTCATTCACATTCAATATTCACATAAAATCGAGT			T	A
1479	TM1479	A1	53288739	0.988	TTATAAAAAATGTTCCTGAAATGTTGGTAATGAACCAAAAAGAAGAGAATTGCCTGCCAT[G/A]CTGAAAATTCTTGATGAGAGTCAAGAGAACAAGAGGTGGTTGTTGTTCTTAAACGAAATT			G	A
1480	TM1480	A1	53325529	0.988	AGGAAATTAGATTTGGATCGGGGAAAGACAAAAATTATCGAATAGTCGTTCTGGTTCGTT[C/T]GTTTTAGTACGAGGTAAGTTCATAAGTAAATAAATGTTGTTAAATTAAAATGTTTGTGCA			C	T
1481	TM1481	A1	53495705	1	CGGCTTGCACATAGGCGTGTTGTTAAGTTGTGTGTCCCCTGCATTGTTAAATGTGAAGTC[A/G]GGATAGTACACGGGCAAAAGACATGGCCATGTTTCTTAGTCGTGTGAAGGACACGGGTTT			A	G
1482	TM1482	A1	53864613	0.976	GCTACTGACTTGGCAACATGGCTGACCACACGCCCGTGTGCTAACCCATGTGCCACACAC[G/A]AAAAATAGACACTCCCGTGTGTCTAGGCTGTGACACCCCTAAAGTGACCCTAGTCGGAAA			G	A
1483	TM1483	A1	54017284	1	GCGTGAGAGAAACGAACAAAACAAGACACAGCTATGTGCACCTACATACCCAAGGAACAC[A/G]GGCATGGGGTGAATGTCAGACGCGCCTAAATTTAAAAATCGCGAAACACACGGGAAAAAA			A	G
1484	TM1484	A1	54119723	0.996	CAGTCAGACCGGATAACCTGGGAGTTCTCCAAATCGGTGTTTCAAGGAAAGTACTTGGGC[G/A]CAAGCTATGTGGATGCCTGGAGGAAGGAATTCTTGAACTTGACTCAGGGAGACCAATCTG			G	A
1485	TM1485	A1	54121970	1	ACTTTCGAGGGATACAATTGTGGTGGATATCTACTTATCTTCTGATCAATTATCTAAGGT[G/A]AATAGACTTGTAGTTCTAGTGTTAGCCGATTATCAACTCCCTCTTGGGCATGTATCTTTT			G	A
1486	TM1486	A1	54145645	0.988	CATACTATAGAAAGGGTTCGGGACTAAACCGAGAACTTACGAAAATCATGGAAATTTCAT[G/A]CTTTAAGGCTCCACACGCCCGTGTCCCAAAGTTGTGTTCCATACACGGCTAAGACACATG			G	A
1487	TM1487	A1	54351640	1	AGGCTTGGGCCGGAGATTCAGAATGACACCTTCTAAGGATTTAAATTTTAAAAATTGAGT[T/A]TTTTTTGTAAACCCACTCTACAGCCGAGTTGTTGCAACTTGGCTCTGATACCACTAAATG			T	A
1488	TM1488	A1	54421650	0.915	CATAGGCTGGACACAAGGCTGTGTGAGCCACACAGGTTGGACACATGGCCATGTGCCAAA[C/T]TGTTTCGATTTCATGATTCACATCCCAAACAAGCAGAAAAATGCAACTTTTAGGCTTTTT			C	T
1489	TM1489	A1	54480603	0.996	AGTTTAGGATACAAATGACATGTCACTAAGAATTAAGAAGTCTGAACTCATTGAGTGGTT[T/C]GGGTTAGTGATATATGTGGCATTCGAGCGCGTTGAGTGGTTCGAGTTCATTATGGATGCG			T	C
1490	TM1490	A1	54570546	1	GATACTATTGACATGTTAGTAAGTGATATGTTGAGTTAGCTTCGGGCCATGATATTAGCA[T/C]TTTGGGTCATATTTTACCGATTTGGCTTCGGGCCATGCATATCGGATAATTTGGCTTCAG			T	C
1491	TM1491	A1	54621235	1	CCTGTGCCCACTATCGGTGCTCAAGACTGATAAAACAACACTGGCGTGTGCATTTGAACA[T/C]GGCGTGGGAGAAGCGAACGAAGTAGGACACGACCGTGTGACACGGTCGTGTACCTCAACA			T	C
1492	TM1492	A1	54676205	1	AAGGAAACTTTTCTTTCTTGGCTCTCTAAACCCACACTTGAGCCACATGTTGCCTCATCT[C/T]GTCACATAGGATCACTATCTCTCTCGATCTCGTCTGTTCATGGCTTACTCAATAGTCCAT	Gh_A01G1160	intron	C	T					A01	54674435	54684502	-	AT2G36630	Sulfite exporter TauE/SafE family protein	0	0
1493	TM1493	A1	54950524	0.949	CTTTCCAAAATCCTCATCATTACCTGCGACAATGCATCTTCTCCCGTGGCCCGATCATAC[G/A]GTCCATTCCCAGCCACAGGTGAGGCCGGAACCTCATTTACTCCAACATCGGGTATATGGC			G	A
1494	TM1494	A1	54975462	1	CGCTCCTGTTTCAAGTGTGGATCAGCTGATCATTTTATCCGAGACTGTCTGAAATTAGCT[A/G]AACAGAATACTGATCCAAGTGGGAGACCTAGTAACACTGCAACACGAGGTAGACCACCTA			A	G
1495	TM1495	A1	55044311	1	TCAGTGATGTGTAGCATAAACTAGAGCTGAATACCTCACCTCAATATGACCAGCACCTCT[A/G]CCCAGTGCTCCATGACCATGGCCCATACCATTCCCACCTCTGGCCTGACCACGGCCTCTT			A	G
1496	TM1496	A1	55062232	0.988	CCTTATTTTTTTCGTTTCTCCTCCCCAATTAATTATAATGTCTTTCTTCCAACCTCTAGG[T/C]TGTTTTTAAAAAAACCCACTACAAATTTTGCTCATGCCGCTACTTGAACCCAGCACCTCT			T	C
1497	TM1497	A1	55091161	1	CATCACTAGGATCAAAGAGATCGACTTGGTTGAGCCTGGATCAACCTCGCTCCCTTCTCA[A/G]ACTTTGGGAAGTTCTTTCTCGCTGGACCCGTTCTTCTAATTGATCTATTCATTCCTGCAC			A	G
1498	TM1498	A1	55193743	1	CCCTGTGAGTGCACGAGTCACTTCGGTCGCTAGTGTGGGAAATGATCGTCGAGATAGAAC[A/G]GAGTGTCAGTATTGTGGTAAATGGTATTCGGGGAGTTGTAGATTCCATGACCGTTCCTGT			A	G
1499	TM1499	A1	55302103	0.935	ATTAGCTCATTAAATCTAATTGTAAACCCTGCCTATTCGACTCGTATTTGTAAGCCTATA[A/G]ATACTAGGATTAAAACATGTTGTTGAGACTTTTGAACCTTTTATGAATATTATAACTTTT			A	G
1500	TM1500	A1	55516973	0.935	CTCAAAATTTTTCTAACATCAGTTTCTCCCCTTCTCTCTTTTCCTTAGTGTTTTATTTTT[G/T]CTTTTTTGTTCCTCTCTATTTAGAATCGATTGTTCAAATTGTTGGGGTTCGAAAATTCAA			G	T
1501	TM1501	A1	55591457	0.965	ATTTTGGTAATTTTACAAATCGGGGGTACTTCGATAATTTTACAAACTGGGGGTATTTCA[G/A]TAATTTCTCTTTGTTAAGGGTTTATTACTTACCTTGGCCTGTTAACAAGTCCTCGTTGGC			G	A
1502	TM1502	A1	55595027	1	CAATTCAAACATAGCATTGCAATATTATTGACACACGAACTTACCTTGAATGCGAGCACG[G/A]CTATATATTCTGATTTAGTCCATAATCTCATTCATTTCCAATCTATGCCCGAATCTCATT			G	A
1503	TM1503	A1	55628899	1	CTTAGATCGACTAGAGTCATCTCTGAACTTCTTCGATACTGAGTGAAAACTCTTACCCGA[T/C]GATCTTTTACGGGAATCTCTGGCTTCAAAATTAGCTTTTCTTTTCTCTTTCCCAAGCTCT			T	C
1504	TM1504	A1	55646269	0.988	AATCATCCTTTAGTAAAATTTCGTTAAAGTATTTACATGTTGTAACAACCCGATTTTGAC[G/C]CTAATCGGAAGGGTGGTTTAGATGTCAATTTGCTAAAAAGGGGTTTAATCGCGTAAAAAA			G	C
1505	TM1505	A1	56012168	0.988	TAGATCTGTGGGAGTATTTGGAAAAGATAGGGTCAAATGGGTGTTAATGGAAATCTTTTG[T/C]TTTTACAAGGCAATGGTCACTACGGTATCTAAGAGGACCTTAGATATAGAGCCCAAGCTA			T	C
1506	TM1506	A1	56099472	1	AAAAAAGAGGTTTGCATGGGACATTGGATTTATCAGTCGATGCTTATGTGCATTAGTGGC[C/T]AGAAGAGAGGAATGTATTTCCTGCATCTCGTGACAGCCATGTATAAACAAGTAAAGGTTC			C	T
1507	TM1507	A1	56212658	0.949	GAATTAAATTCTTGAAATTAAGTGCAGACTTCACACAACCTGGGCACACGCCCATAGGGC[A/G]GACCGTGTGTCACACACAGCCTAGACACACGCCCGTGTGTCTACCCGTGTGGACAACTTT			A	G
1508	TM1508	A1	56215226	1	GGAGTGAAGATTGTGTGTAGAGGCTGGATTGGGTAGGACTTTTTGATTGCATACTGTACT[A/G]TTACTGTAATGGGCTTAGGTCCCACTGATACTGTTACTGAAATGGGCTCAGGCCCAGACT			A	G
1509	TM1509	A1	56387375	1	TACTATCAAACCGTCATCAGGCAAATTTAACTATGTGTTCAAAGAACATACTGAAAATAA[T/G]AACTTTCGACTCAAAGCATCAGCAACTACGTTTGTTTTCCCCGGATAATAGTCAATCACT			T	G
1510	TM1510	A1	56611242	1	GTATAAGGGACAATATGCTTGTGTATGAATGGTTGTAAATTGGGCGAAATTTTATGGCTC[A/G]GTTTTGCATGAATGTTTTGTTTTAGTCCGGTAACGCCTCGAACCCTGTCCTGGCGTCGGA			A	G
1511	TM1511	A1	56652335	0.988	GTAGACACCATTGCTTTAATTTGATATCTTTTTGTTGTAGTATTTCTAGTCTAGACATTC[G/A]CACATTTGGCGGCAGTTAAGAGCATATCGAATGTTTAGAATGCACAAATTAAAATCAATT			G	A
1512	TM1512	A1	57386284	0.949	GCCAAGAGATGCGGCAGTGAGGTCTGAGGGCAGAGCGCTTGCAAGGAATTATGCTATTCG[T/C]GCCCGTGAAGAGGCAGAGTCTCCTGACGTGATCATGGGTACGTTTTCTATCCATAAAATA			T	C
1513	TM1513	A1	57455519	1	GTCGGTGGTGCGAGGGACTAGGAGATGGCCACACTACTGTTTACATTTTCGTTTTGATTA[G/T]TAGTAAAAGTAATTTTATTTGGGGTAAAATTTTATGTAATAAGGCCGGTTTAAGTTTTTA			G	T
1514	TM1514	A1	57459264	0.988	GGCCCAAGAGTAAATTTAATTCGAGGCAATTCCTGAATTTTAATTTTGGGAGAGAGAGTT[C/T]TGGCGATATGGGCTTTTAAAGTTGAGGTGGTTAAATAGGACACAAATAAGGCCTTGGTAA			C	T
1515	TM1515	A1	57569860	1	TACTGACTCGATACAGGGTTTATTCATATTAAAAACAAAACTTTTGCACAAGCCAAGGCT[T/A]GAACCCAAGACTTCTCAGACACTTCCTAGGACACTTAACCACTGAAGCAGACATGCAATT			T	A
1516	TM1516	A1	57616508	1	ACCCAAAATACTTAAGCTCAAAAGTACCAAGTGGTAGTTGGATAGTGTGATGAAGTCTCT[G/A]ACAATTCTCGAATCCGAGCTATCTTTGATTTCACTATAAAACACGAAAAATAAATAAAGT			G	A
1517	TM1517	A1	57746113	1	GAAACTCCTAATTTTGGTGTGTTTCTTGATGGAACCAGATAGGAGAACGTCTCTCTGGAA[G/T]CAATTTCAACCTAGAATGAAAATAAATAAAATCAGTAACCTAAAGTAGTAAGAACTAAAT			G	T
1518	TM1518	A1	57784901	0.988	GATCCGATCTTATTCTATTTTTCTTATAGATACAAGATCTCAGGTGAAACAAATCTTGTC[A/G]TAACAAATGAAGTTGAAAGTAAAGTTTCGGCTTCGAATCAGGAAGCGAGTCAAAGTATGT			A	G
1519	TM1519	A1	57838880	0.965	GGTGTTCGGCCCCTTAAGATTTGTATGGAAACAAAAGACTATTTGGTACCAAGGGAAGAA[T/G]AAAGAAGAAGTTGGCTAAACCACAAGTGAAACAAAGAAAACTGTGTAGAGGAAGGATAGA			T	G
1521	TM1521	A1	57947074	0.965	CGTGTGTCTTGGCTGTGTGAAGTCTGTGTAACGCCCCGTACCCGAGACTGTTGCCGGAGT[T/C]GAACACGAGGTGTTAACGGACTTAATTCATTTACTTGCACAGTTCATTTTAAAATTTCCA			T	C
1522	TM1522	A1	58020291	1	AAATCTCTGGCTGATATATATCTTACGAAGTTCAGTCTGAAAGAACTCCCAGGTCACCCG[T/C]TCTTTTGGAACCACCGATACTAGTGTATTCCACCAGTGATATGCAGTGTAACGCCCCAAC			T	C
1523	TM1523	A1	58076845	0.949	GTTAATTCGCGCTCCAAACACTCTTAGCTGACGCCCAACCCAAACAAGCACGTCACAAAG[C/T]GAGCGGGATCAGCCAAGAAGGGTATGCCTACTCTCCTCATGGTTTGCTCTATTTAAAGCT			C	T
1524	TM1524	A1	58081157	0.996	ATCCTTAACCCTATGCTCCATAGATCCGCATCAGAAGCAAGCACCAGAACGTTTCCGACA[G/C]TCGCCCATATGCATCTTCCCACAATTCCTACAACCTTGCAGTCTAACAGCATTCATCGGT			G	C
1525	TM1525	A1	58097115	1	GTTTATTTTTGTAGATCGTTGACTCTTAGTATTTGCTCGAGGATCGTCAGCACTTCGTCA[A/C]ACTATCTACTATTGTGGTAATCATGTGATTTGGACTTAGCTTATGGCATGTATAGGATAG			A	C
1526	TM1526	A1	58398847	0.996	GGGCGTGTGCCCTGACCATGTGAAGTCTACACTTAATTTTTGGAATTTAATTTGCCACAC[G/A]GCCTAAGCACACGGGCATGTGACTTGGTCGTGTGACCTTATTTTGTTGATGACTTCATAA			G	A
1527	TM1527	A1	58642929	0.935	CTTAATTTGGTTTCCAAACTAATGAAAGATTGAGTTGTCATGGAATGTTTTCCGAACACT[G/A]TTAAGCACGAGAAACATAAACAAAGTTGAATAGTGTAATTATCTTAGCATATTAATGTTA			G	A
1528	TM1528	A1	58928923	0.988	TTATCCCCACATGGAGTGTAGGGTTGGACAGAGTGGAGTGTAGAGGATGGATTGGTAGGA[T/A]TTCTGATTGCATTTCTGTTATTGTTACTGAAATGGGCTAAGGCCAACACTAATACTGATC			T	A
1529	TM1529	A1	58976999	0.976	CATAACCCGTGTCCCCTACACGGTCATGACAAGCCCATGTGCTAAAACCTTGACATTCTG[C/T]TTCTGGCATCAGCAACCCTTAAAGGGCACACAGCCATGGTACACGCCCGTGTACTACTCC			C	T
1530	TM1530	A1	59025005	0.965	AGTAAAATGGCTAAAGTAATAAAATTTGAGTGTCCCTAATATCCTAGTTCCTCAGCAACG[G/A]CGCCAAAAACTTGATACATGATATTCGTGACAGGTTTTAAACATTTATAATTAATCATTC			G	A
1532	TM1532	A1	59197330	1	CCTCCCCAATGGTAACTAGTGTGAGGAGTGTAGATGATCAAAAGTTGAAATGTAAGATTT[G/T]CAACAAATTTCATTTCGGAGAGTGCCGAATGAAGAGTGGCACATGTTTTAGGTGTGGTCT			G	T
1533	TM1533	A1	59236728	1	GTGTGTTTTCCCACGAGATTAGGGCTCTTTGTCATAGTTAACAACTAACATGCCCTACCA[A/G]TGATCCAACATATACGGATATCGAGTTTGCACACCAAGGAAGTCGTATTTATTTTTTATC			A	G
1534	TM1534	A1	59246743	1	CACATGCACATTCTCATATTCTAGGCCTCACAATAATTATAAAATAAATATTTTGATGTC[A/G]GATTTGTGGTCTCGAAACCACTATTTCGACTAGACCCAGTTTTGGATGTTACAATTCTTC			A	G
1536	TM1536	A1	59439073	1	TGGGTCTGAATCCCACTTTGCTCAAAAGAGGGATTTATTTTTGCTAAAAGATGGACAAAT[G/A]TGGTGTTGGCTTTCAACTCTGTAGGGAGTGATAAGAGGAGAAATTTGAGGAGAGGATCAA			G	A
1537	TM1537	A1	59547649	1	AAGAGGGGTGTACACACTTTCACAATCAAGTGCGTAATCACACTGCTATATACGTAGATC[A/G]GAAAAAGTCGAAAAAGTATGATTATTGATGCTACACAAGCCTGCGCTCGCTCGTGAGATA			A	G
1538	TM1538	A1	59736293	0.988	TTGATCCGGGGTCAACGGATTCATATATTTGCATGAGATTGGCGTCAAGTATAAACATAC[C/T]TGTTGAACATACGAAAGATATTATTAGAGTGTCGAACCCACTAGGCAAGTTGATCCTAGT			C	T
1539	TM1539	A1	60247971	1	TTGTGAACGATTAAGTCTAGTAATGCCTTGTACCTCGTTCTAGCATCAGACACGGGTAAA[C/G]GGTGTTACAATCCTAAAAGTGCAAGAGACTTAAGAAACAAATCAGTTAGATTTATGTACA			C	G
1540	TM1540	A1	60455966	0.988	ATAAAATGTCACTGTTCTGAGTGGACATTAAATTTTGATGGATTGCAATGCATCCCTGAA[A/G]TGAGACAAAGAATTATATTGTAATGAGCTTATCTATCTTAATCGATAATTCTATGATGTA			A	G
1541	TM1541	A1	60599235	1	TGGCATTTTGTGGGCTTGTGAGTGTGTGAGTGCTCACAAGACATTTAGAAATCATTAGAT[T/C]TGAAATCGCAAAGTGGTAAGTTAGTCGTGTGTAAAATTTCGTGCACTTTAGTAATTGGGC			T	C
1542	TM1542	A1	60649238	1	CAATTTCCCGGATGTCTTTTACCATATTGTTTACATTCAGGTCTCTTAGATCAGACATTC[C/A]CGACACTTCAACAGAAGTAGCAAGAGTTCTGAAATTAGAATGCGATCTAGCTCGATCTTC			C	A
1543	TM1543	A1	60781860	1	AAAGAAAGAAAATAGAGAACAGAAGGGGAGCAATCTCGACAATGTTTGAGGGATGTATTC[A/G]GCCAATATTGGAAGAGAAGGAAAATGCAGAGATTCGGCCAAACAGAGTAAAGAAGAGTGC			A	G
1544	TM1544	A1	60948513	0.935	TGGTAGATTTTCTATTTGCATCTAGAGGATGTTTTGACAAAGATGGTACATGAGTTCTAT[T/G]CTCATCTTACGTCTACAAACAACACTTTTATTTATATCTCCAATAGTGCTCTTTGATAAA			T	G
1545	TM1545	A1	61055430	0.965	GCCTTAGGGATGTTGGGTCGATTGCTTTAGTTGATATTAGGGTTAGGTTCTTTTCTTTTT[T/C]TGTCTTAGAGGATTAGGGTTAGCCACCTGAAAGTTTTCATTAATTCATTCTGAGTTCTCA			T	C
1546	TM1546	A1	61081311	0.965	TTCAATTTATACATTCAATTTAGACAAGAAATAGTTTCAGAGAACTTACAGGATCAGCGC[T/C]AGAGACTCGGTGTACCACACCTTCAATAAAACATTTTTAAGTATTTTAAAACAGTTCTTT			T	C
1547	TM1547	A1	61122838	1	ATATTCTAAATTGTGTTGTGGGTTAAGTAATTCCTCCTAACCTATTCCAATGACGGTTAC[A/G]GGTTAGGGGTGTTACATTTAATTCATATCATAGCTATGGTTTAGTCGGTTCTAGGACTGC			A	G
1548	TM1548	A1	61334379	0.996	CTTAGGAGCATTTTATTCAAGATTGCCCTGAAATGGCTGAGAAAGATAAATTTCAGAGTG[T/C]GAAGCCGAGTAATTCTACTAATAGGGGTAGGCCACCGAGGAATACCAGAAATGGAGATAG			T	C
1549	TM1549	A1	61438545	1	TTGTCCCTTATAAGACTCTACGATACCTTGAATGTAACACCCCATACCCGTATCCTACGC[C/T]GGGATAGAGTACAAGGAGTTACCTAACTTAAACTCGTGCTTATGACCAATTTCGAGTCTC			C	T
1550	TM1550	A1	61649401	1	ATCAGACGATATATCGGGACAGTGTACGACCTCCCGATACTTGAATAAAAACTCCATCTA[T/C]GAAAACAAATTTCAAGTAAATATAGTATCGTTAGAATAGTATCATTATAAAGAAATTGTC			T	C
1551	TM1551	A1	61661866	1	TGGACTAGGGAAAAACGAAAGTTGTCGACTAGCAGCTCCGTCCCGTTTTACGACGTCTAA[G/C]GTAAGTTTATAAGCAAATACACATGCCTAAATGTAGTTAAATGTTAAGTATATATGCTGG			G	C
1552	TM1552	A1	61719693	1	CTTCTCCACCGGAATAGAAAACTCGCACTTCCTCTACCAAGTAATCAAAACCCTCAAATT[A/T]TCTCTTAGCCTGTCCTCAAACTGAACACGCCTCTCATATTCTGATGCCACTATACCACAA			A	T
1553	TM1553	A1	62336162	0.965	TAAAATAATTATTTCTACTTTGGATTTGTGGACTCGAAACTACTATTTTGACTAGACCCT[A/G]ATTTGGGATGCTACAAATTCGGTTAGCTCAATACCTCACTTTATTATCCTTCTTGAAGTA			A	G
1554	TM1554	A1	62384409	1	GCTACCTCCTGCGATTACCGCTGATCCAGTAAATCAGAATCCTGCTCTACACACTATGTA[T/C]GATTATGCTAAACCTACTTTAACTGGAACTAAGTCAAGTATAGCTAGGCCTGCTGTTGTT			T	C
1555	TM1555	A1	62392977	0.965	AGATAATACTATAACTTAGGGATTTCTACGGATCAAATCAAATGAATAAATCGTCTGATT[T/C]AGAGTCAAATAACAAGTGAAGTCTAGGTGGATTTTTCCTTAGGTATTGACTTAATCAATC			T	C
1556	TM1556	A1	62500149	1	CCACTTCTTTGAGTTGCTCTTCTTTCGAGTCCAACTCCACAGTGCATCCTTCAATCATCT[C/T]GATAGTGTCCTTCACATCACCCATGGACTATTCGAGATTGACCATTCATTCCTTCAAAGC			C	T
1558	TM1558	A1	63031699	1	GTTTATATTCGACATTCACCGATTTGTTTTTATTGTGATCTACCTCACCTTGACCTTTGC[T/G]TACCACAGTTTCTTGCCTCGGTTCTGGCTCAAGCTCAACAAATCCTTCTTCATCTTGAAC			T	G
1559	TM1559	A1	63387811	1	AAAAATTATTTCGTACTCTTATGATAGTTGGCCGACCCTAGTATAGGTATTATCATGCGA[G/T]ATAACAAGAAGTTTTATTCATAGAGGATAAGTAGTCACAAGATGTCACTCGGTGAAATTG			G	T
1560	TM1560	A1	63469230	0.965	GTTTGGCACGACACAAGGCCAATGTGCTACCCAATTATTTCAATGTTATTTTCATCCATG[T/A]AATCCAACTTATACGAAAACTTAGGCATGTAAAAGACGTAATTTGGGCTTCTAAAACCTC			T	A
1561	TM1561	A1	63517307	1	TCCCTATTCTACTTAGGCAGTGTGAATCACATGAGCCTTCAGATCGGCAATGTCAAAATG[G/C]CCACACAAGCGTGTCACCTTTCCACACGGGTGTGTGCAGCTGTTTCAAGTGACATTTTTC			G	C
1562	TM1562	A1	63685926	1	CAAGTCGAAAGTACAGACAGAATGATAGAGGCACCCCTTAGCAGTGTTTGGCAAAGGAAA[C/G]CAGATGTCAGACAAAAGATCACACTGATAAAGAGAAACTAGAGGGAGTCATGGATACTTA			C	G
1563	TM1563	A1	63832714	1	TTGACAGTTTACTTTTTTTCTACGCAGGTACATCAGTAATGAGGTGTGACTCAAGTGGCA[G/A]AGGTGTGCATACAGAATACCAATCCACTCGACTCATCAGATTCAATCTAAAGAATTTCAC			G	A
1564	TM1564	A1	63851692	0.996	AGTGTGTGGGCCCATTTGGGCTGAGAAAAGGGCTTTAGGCCCATTCGTATTGTTATCCCT[A/G]TTTAGAATACTTTAGTTTACCAAAATACCCTTGGCTTACAAAATTACCAAAATACCCCTG			A	G
1565	TM1565	A1	63925707	1	ACTAAAATCCACCCATCCAGCCAACACACCTCTCTGTCTCCCGATCACACCCAAAAAGAG[C/T]TGTTAAACCTCAGCCAACCAATCACACTAAATAAGACCTCAAAAGGCTCATCCGACCCTA			C	T
1567	TM1567	A1	63982378	0.988	GGACTTAAACATTCACAAACATGCAAAATTCAGTCACAAAATTTCATTCCAAATTAAAAC[T/C]GATCAAACAAGATCATATTATCCTTATGATGGACCTACGAGGTCCAAAACCTACATTAAA			T	C
1568	TM1568	A1	64336810	0.935	TTTTCATTCATATTCTCTTTGTTCTTCATACACACACTTGGGTAACCATTTCTTGTATTC[C/T]TTTCAAGTGTTGTATTGTTACTGAACGAGCTTTATCATTGTACCTTTGAGAGGTGCCTTT			C	T
1569	TM1569	A1	64344919	0.915	ATTGGATTGGATGATTTATGTTGAATATTAGGATAACGGATAGCCTTTAGGTGGAGTTAT[A/G]GGGTGCGAGTTGGTCTTTGTCTCACAAAATCCTTGGGGATTCGTCGGCTCATAGTGGAGT			A	G
1570	TM1570	A1	64423810	0.996	AAAACCAATGGAACCAATAACCAAACCTAGCATGACAACCTCAATATTCAGAACTCAATC[A/G]CCTCACCTAGATCTTCGAGAGGAGCTGTCAAAGTTGATGGACGTAATGCAACATATGCAG			A	G
1571	TM1571	A1	64501397	1	TAGTTGAATGAAATTTGGTCATTCGAATTGGTTTTATTATGCATGTTTTAGGTATGTTTT[C/A]ATGTTTGATTGTGTGTGCAAATGGCTTGTAGGTGTGTACTTGACTTGGGTGAAAGAAATG			C	A
1573	TM1573	A1	64685236	0.915	CACATGGGCGTGTCCCAATGCACACGAGCGTGTGTATGATCTCAACACGAGCGTGTGAGG[A/T]ATTAAACTATAAGTTTTCCTTAGATCTTTATTTTGGTTCTGAACCTTTCTCAATGTTTGT			A	T
1574	TM1574	A1	64759757	0.935	CAGACTAGGGTTAAGAAGCATTACTAAATATATCGACACATTTAGCAGTCATTTCACAAT[T/C]ATCATAGCATCATAGGTCATACATCAATATAAAGTCCCTTACATAGGTCTACGAGACCTT			T	C
1575	TM1575	A1	64765822	0.935	TAGTGGGTTCAGCACCCTGTGGTGCCTCAGGAACTGGTTGAGGAGCAGGTGGGGGAGATC[G/A]TTGTACAGCGGGGTTTGTTCTCCGATACTATGTAAAATATTCATTCATTATTTGAAAGAA			G	A
1576	TM1576	A1	64966331	1	CCAGTGATATGATTTATGAAAAGGCTTCGGCCCAGTAATATGATTTATGAAAAGGCTTCG[G/A]CACAGTATATGTCGAGACTGAATTAGGGCTTAGGCCCATATTGCTACTGTTTAAGGGCTA			G	A
1577	TM1577	A1	65094164	1	ACACTGTCCCAAACTAGTGTAACTCTCTGTTTGTCAGCCAAGAACAAATTGAAGACACAC[A/G]GCCAAGTCACATGTCCGTGTGCTAGGTCATGTGGTCGATTTAAAATTTATGATTTTTTAT			A	G
1578	TM1578	A1	65202247	0.965	TTGATGAATTTGATATAATTTTGGGTATGGACTGGTTAACTTTGCATGACGTTGTTGTGA[G/A]GTGCAAATAGAAAACTATTGATTTGAGATGCAAGAATGATGAAATAGTCAAAATTGAATC			G	A
1579	TM1579	A1	65464081	0.976	GAACTGTTCTAAATACTTGGGGCCCGAACCTTAATTGAAGGCCGCTGCATCGATTGGGCT[G/A]CCATAGAACAAGTCCAGATGGCCAATGCTATTCGGGCTCTCTTAACCACCAACCCGTGGG			G	A
1580	TM1580	A1	65987352	1	ACTCTGACCTTCACACATTACGACTTGGATATCTCCCTGTACAGGGATTCAATACTGATG[C/T]CGTTTGTTTCTATAGAAACTAGGCTCGAAAAGGAATCTATACATATATGGCATGACTTCT			C	T
1581	TM1581	A1	66026205	0.988	TATGGCAGGATTACCAGTCCAAGCTAAATCCCCTATATCATAAACTCATAAGGTGATGTC[A/G]GGATTACTAGTCCAGGTTAAATCCCTTATAATGACAAACACCCTTAATGAGCTCGGATCT			A	G
1582	TM1582	A1	66157521	0.949	AGTTTCAAGAGCCGAACATCCTCTGTCCGCCACTACCCTTTCCACTCGATCAATTCTAGT[A/G]TAAGTGCTTTGTTCTCTCAATCAATTTTGCTAGTATCGATTACTCTATCCCTAACTTTTT			A	G
1583	TM1583	A1	66202939	1	GCACCATCTTTTATGCTAAAGCAACTACCACCTGCTTCTGATGATTTTATTTGATATTTG[G/A]GGATGGATATGAGGAGATATGTTTGTGTAGTCTCCGATAGGGTAGCTATATTGCAAATTG			G	A
1584	TM1584	A1	66253315	0.988	ACTAAAAACGTCTAACCCTAGATTGAATAATTGAAATCTCTTTATAATTAATGCCCTAGG[G/A]TTACATTAACTCTATCTATGGACCCTCTTATTAGGTTTCACCCTAATCCGGCAAAATCTT			G	A
1585	TM1585	A1	66299317	0.996	GTCATATATAGGCATGTGGATTTGTCCGGGCTTTGTAAGAGGTTGTAGGCCTAGTATATG[C/A]TGACTGCATAAAACTTATTTAATTTATTAAGGACTATGGACAAGTCATAGGGTTAAGGTG			C	A
1586	TM1586	A1	66358049	1	GTATTTATAGGCCTTAGAATGCCTGAAAGCCCTCAAAATAAGCCTTTTCCAAATTAGACT[C/T]AGCTTGGGCTTGGCAGGGACACACCAATGTGACACGCTCATGTGCGATTACTTTAGGCCA			C	T
1587	TM1587	A1	66561952	1	AAATTTTGGTTTTAAGTGACTAAAACCCTGGGTGCTTGGATGAAGGAATTTTAAATTATT[C/G]TGGTAAATAATGACACAAGGAAGCATGTGGTCTAGTGGTTGTGGCGTCATTAAGGTTGCA			C	G
1588	TM1588	A1	66631162	0.9	CCATTAAGGGTTTGGGCCCAAAAGCCCGAATTTGGTAAGCGGGTTAAAGATCATTGTTTA[A/T]ACAATCGGAAGTATTGACAATTGTAATGAACATGGAAAACCCTGACTTTTGGTAAAATTA			A	T
1589	TM1589	A1	66791593	0.935	CGATCTTTAGGACTAAATTGTAAAAGTGTGGATGGTTATAGGCAAATTGGTCATTTTTCC[C/T]GAGAGTGAGTCTTAAAGCCGACAATGAACAATGTAAGGTATTAATAATTTATTTTTACTG			C	T
1590	TM1590	A1	66975036	0.996	AATAACAAAAAACGTGGCGGAGCCACTAGAATCAGAATACGTGGCAAAACCACTAGTACA[G/A]AACTTCCTCTAAATCAGATCCTAACCTCATCCAATATGTCATGTCTTAAATATTACGCGT			G	A
1591	TM1591	A1	67004650	1	TAGTAGTGTATACTAAAACTGCAGTGAGACTGATGGACATCGATAGACACTACGTATTGC[G/A]AAAACAAACTCTTAAGTACTAATATTATTATTCTATAAGATACCTATTAATAAACAACTG			G	A
1593	TM1593	A1	67358346	1	TTGCCGTCGGGGAGTTTTAGAGTTTAGCGGATGAAGGGATCGGTCACAACAAATGAAGAG[A/T]AAAGAAGGATACTAGTCTAAATGAAATCGGCACAACCAACTTCAAAAGTTTCGGCTCTTG			A	T
1594	TM1594	A1	67384289	0.965	AATAGATACACATTTCAGTTCAATTATACGAACTTATCTCGTATACTGAAATAACGGAAC[G/A]GACCGACTATTCAATTACTTTGCTTTTTCCTTGATCTAAGTCTGAATTCCTCTTTTCTTG			G	A
1596	TM1596	A1	67719341	0.935	GGATCTTCCACTAGCATAACGAGTAAACAAGAATTACTAATCTTTGTCAATCAACTAGTC[G/A]CTACCCTAATAGGATCTTCGACTAACATAACAAGTAAGCAAGAATTACTTATCTTCTGAC			G	A
1597	TM1597	A1	67807269	0.965	CACTTCCTCCATTTATATAAACCCAACCCATGCAACATGTCATGTATGCAGAATGTCATG[G/C]CCATATTTGACTCAAGCAATCACAATCAAGTCATTCATATCACCAACATATATTCACAAT			G	C
1598	TM1598	A1	67820683	0.976	ACCCACGTGAGCATGTAACTCTCTAAAACTAGAAAATTTTCCAAGTGTTTTAAAATTTTC[G/A]TAAGTTCTCAGTTTAGTCCCGGACTTCCCCGATGTATGTTTTGGGCCTCGTAGGCCCGTA			G	A
1599	TM1599	A1	68014271	0.996	TGGGCACAACTATTGGTAGAGAGAGATTTGCTATTAATCATCTATTTTTTGCATATGATT[G/T]CATCCTTTAAGGCGATGCTTCGTGTGAGGGGGCTAGAGTGTACAAGATATCATTCGAGAA			G	T
1600	TM1600	A1	68121930	0.935	AGTATTGAATTCTAACTATGTATAAGATTGTATGACATATTGCATGTGCATTGCAGTGGA[T/C]TATTATTGTGGTTGATGGAGAAGCTCCGTGGAGTACCGGTAACATATTAAGTCCGCATTT			T	C
1601	TM1601	A1	68275541	0.988	TTAAAATGATTCTTTGGTATGGTGATGAATTTTTGTACAATCATGAGTATATAGATAGAC[A/G]GATAGTTGGAATAAAGAAACTATGTTCTCGGGAGTATGATACATGCGAGTTTATTAGAAT			A	G
1602	TM1602	A1	68297843	1	GACAGTCTAATGTCCTCGTTAAGTCCGTCTTCGAACCTTCTACACATTTTGGCCTCAGAG[T/G]ATACTCACTCCCGAGTGTACTTACTAAGTCGGATGAACTCTATTTCGTATTCAGTGACCG			T	G
1603	TM1603	A1	68337366	0.949	TGGTACTTAAGCAGCCTTCATGGCTCACCTCCTTTGTTTTGGATACCTACCTGGTGCACA[G/T]CTTCCATTCACTTTATTAACTTAGCAAAGACTATATTTTAAAACACTAAAAAGGACGTTG			G	T
1604	TM1604	A1	68351999	1	ACAGCCCAATTTTATGTAGTTGATTGAGTTTAAGTCCGGTAACACCTCGAGCCCTGTCCC[G/A]GCTTTGGATACGGGTGAGGGGTGTTTTATTTAGTGGTATCAGAGCATGTTTTAGTCGGTT			G	A
1605	TM1605	A1	68389936	0.988	TTCGTTAGATCGAAAATGGTTATACTGTTAATTTTGGGCTGAACAATGAAGGGGTACTCT[A/G]TTTCTGAGGTAGAATTTGTGTACCTAAAGATACTGATTTGAGGCAGGCTATACTGCGAGA			A	G
1606	TM1606	A1	68519136	1	GATTAATATTGATATGGGATAAGGCCCAGTTAACTTTGATTTCTGAATAGGGCTTAGGCC[C/T]AGTAAAGCTTGAACTGATTTGGGCTCTGGTTGGGGTACTTTACACACTGAGTTTTCCAAA			C	T
1607	TM1607	A1	68551368	1	TCTTCTACCGAGCTGAACAAGAAGGCATATGTTAGGGATGTTACCTTAGTAAACAACGAG[C/T]GATGACAACCCAAAAATTAAAAATGGATCATTCTCATGACATTTTGTATTTTGTACATTT			C	T
1608	TM1608	A1	68584118	0.976	AATCCTTTAATTTCATGTTTTATACTTAGGAGAGCATAGAAGAGTAAAAAGAGCAAGAAA[T/C]GGGCCGAAAACGAAGAAAATGGACCCATGTGGGAAATCAAAACGGCCTAGACTTCCTTAC			T	C
1610	TM1610	A1	68890419	0.988	ACATTACTTGTCACTTTATTACTTGTTGCAATTGTGTACACTTGCACATTGTCGTCGTTC[C/T]ACTTTCTAGCTTTATGTTTATACCAAAAATGCCTTAGGGCATCCCTAGGTATTTCAATAT			C	T
1611	TM1611	A1	69303515	0.965	GTGGTTGTATAAATCATTCTACTAGTACTGATCATGTGGTGAAACCTTCTATGCAGGAAA[C/T]ATTTACGAAGAACGCATATGAGTTGTGTTCAAACAAAAAAAAATGACCGATCTATGAAGA			C	T
1612	TM1612	A1	69324285	0.965	AAACTGTAAGTAAAGCTGCGCCAAACTTTTAATTCTTTTATATGACTGACTGTTCCTTTT[A/G]TAGTAGGGGATTTCACATTGAGTTTTCATAAACTCACCCCGTTTATTAACCTTTCAGGTA			A	G
1613	TM1613	A1	69400014	0.935	TTTGGATGAATATTTATGCAAGTTGGTGAAATGGATGCTCCTAATCCTTTCAATTCATGT[C/T]CCTCTACTTATATGATATTTGGGAGCTAAAAGAGCTAAAAACAAGTGAAAATCAGACAAA			C	T
1614	TM1614	A1	69691858	0.965	ATGGTATCAGAACTATTGTTTAGTCAATTCTAGGACAATAGTAGGCTGTATCGAGTTTAA[T/C]TAAACATGCCATTATACGAACATTGATAGTGTGACATCTCCTAGCTGTTTAATTGTCTTT			T	C
1615	TM1615	A1	70132694	0.949	CAAAGACTATCTTTTAAAACACTAAGAAGGACGTTGAAAGAGGCATGGGTTTTTCTTAAA[A/C]ACTTCAATGTGACACGTTAGATCCGGCCATAACGTCTGGGCTGGGTTTGGGGTGTTACAT			A	C
1616	TM1616	A1	70275495	1	GCTCAATCATCCAAAGGAACACCCGTCTGGGCTAGATCCTTTTCATAATTGAGATCAGCG[A/G]ATTACCCGTCTGGGCTAAATCCTTTCTGCAACACATGTAGGATCTCATTACACGTGTAAA			A	G
1617	TM1617	A1	70280707	1	CTGATCAGCTAATACGGCAAACTCCTGTATTTCAAGGATTCCGATGAACAACTTGATTTC[C/T]TCATTCAGACCTTCCTCGAAGCGTTTACACATTTTCGACTCAGTTTGGACCCATTCAGTT			C	T
1618	TM1618	A1	70427068	0.965	TTCAGTAATTATTACCTATTGCTAAGGTTTCATGCTCATTCTACCGTTTACCAAGTAATC[G/A]TAAGTACTTACCTCGTCTTTTTACCAAAGTGGGCCCGTTGGCTCATTGGCCCGTTTTCAG			G	A
1619	TM1619	A1	70476491	1	CCCAAACTCGGCCCAGAGTTTATGGCTGAATCTGGCGTGTCACATTGAAGTGTTTTAGCG[A/T]TAAATGTGTTCTCATTGAAAACCCTTCTTAAACAAAAGAAACCTTAATTAACTTAAAAAT			A	T
1620	TM1620	A1	70492855	1	ATGGAATTCTGATGGATAGGTCACTTCTCACGAGAAATAGGATTGCATGTGTTTCAGAAA[A/G]GATTTAGCCCAGACGGGTAATCCATTGATCTCATTATGGAAAGGATTTAGCCTGGACGAA			A	G
1621	TM1621	A1	70518138	1	TTTTCGTTAGAGTCGGGAGATATCACACTATCGCAGGTTAAATGTGGCATGTAAGGCTAA[G/A]CTCACATTACCTATGTTAGTCCTTGAACCGACTAAACCATAACTCTGATACCAACCAAAT			G	A
1622	TM1622	A1	70578235	1	ACAAGGGCATGTGAACAACCCATGTGAGGAAGTCCAGGCTATGTTGATTTCCTACGTTGA[A/C]CCATTTTCTTTGTTTTTGGCCCATTTCTCACTCTTTTTACTCTCCTATGCTCACCTAAGT			A	C
1623	TM1623	A1	70626030	1	TTCCGCTTGTCCAAGCCTTCGTTCAGTAGCCTTTTGATCCCACTATTATCAAATTTAAAA[T/C]AGTTATCACAACCCCCCTTAGTGCTATAAGTCCAATCGACAACCTTCCTAACCTTTAGGG			T	C
1624	TM1624	A1	70642198	1	GAATAAAATGGTCTAGTGTACCACATCAGAAACAACCTATCTCAGTTGCTCGATACTGAC[T/C]TGGGTGACGTCGTCCACATCGGGGACACTCTGGTCTATCAGGCTGAACACTGCCAACACT			T	C
1625	TM1625	A1	70649895	0.988	TTAGAAATACAAATCCTATCTCGGAACATCAAGCAACCGTCAGAACTGATTCAAAAATTT[G/A]ATTCTGTAACAGTCCAGTTTAGACCCTAGTCAAAATTGTGGTTTCAAGACCACAAATCTG			G	A
1626	TM1626	A1	70875956	0.988	TGGTTTGGTATGAGGTTGCTATTATGGTTAGTTTCAAATTGGGATATTAAGATTGGAATG[A/C]TGACATGTTGTGGCTTGATTATGTGAGGTTGAAATGGTAAGTTTTGTGGTATGAAATAGG			A	C
1627	TM1627	A1	70949688	0.976	TGGACACATTTATCGGCTTTTTCTATTTACGATTTGAGCAGTGTTTACACACCTATTTGC[G/A]ACAGTGCGCACCCCACTCTAGGGCACTCTAACCTAAAGTCAAACATAACGTACTGTTAGT			G	A
1628	TM1628	A1	71068892	1	ACCATGTGGGGATATAAATATCGACCCACCCAACCGACACATCAATGGTAGCCTGATTGC[G/A]GAACTACCTTCATTTACACATTGGGCTTTAGAAGTCGTCGATGGATCCACGATTGTCAAG			G	A
1629	TM1629	A1	71077434	0.965	TTCTAGCTCTGTCTTTACTTATCAACTCATTCTCAATCTCTAATCATACTTATAATTATT[T/C]TATCATTGAACTCTTTGGTTTTTCAACGGGGAACTTATTCAGTACAAGTCTCATGAAATT			T	C
1630	TM1630	A1	71089380	0.935	ATTCAAAATCGTCTGAATTAACTCCAAATTTATTCGAACACAAAGTCTATTTCTGAATCT[T/C]AGACAGTTGTCAACATCTATTCGGAATTCAGAATCAGAATCAGAATTACACTGAGTTCGT			T	C
1631	TM1631	A1	71100725	1	TGGCTGAAACCAAGAAAATTCGCTACCTCCTGCGATTGTTGTTAATCAAAATCCTACTCC[A/G]CGTACTATGTATAATTATGCTAAAACTTTTTTAACAGGAACTGAATCGAGCATAGTTAGG			A	G
1632	TM1632	A1	71103650	1	AAATATTTTGTTGTGCATGTAAATTTCATTAATGAAGGCTTATTTTAGTGGTTAAGTGTG[C/T]TGAGAAGTGTTGGAGAAGTCCTGGGTTCAAACCTGGACTCTAGCAAAAATTTTGGTTTAA			C	T
1633	TM1633	A1	71264334	0.965	GCTACATTTACCACCGAAGTGATCGTGAGAAAATCTTACAAAACTAGTCATTCTTAATTC[G/T]ATTTCTGAAATAATTAATATTGAGTATTTAAAAAAAACCAGAATAATAAAATGATTAAAC			G	T
1634	TM1634	A1	71269009	1	TATAGCTTACACCCTTTCTTTTCCATGTCTTATAGGGTTAATAAGCTAGCTTGGATTGGA[T/G]ATCGACGGAGATTCTCACACTATCCAGCTATCACTTTGGGTATTCTTGAATTCAAGTATT			T	G
1635	TM1635	A1	71273790	1	AAAGTCCCAAAATTAAAGTCCAAAGTAAGTAAACACACCCCAAAATATCAAATACCAATA[A/G]CAATAGAGTTAACTAAAAAATGACCAAGATTGCCTCCGTAGCTAAGCCCATCCTACCTCG			A	G
1636	TM1636	A1	71279946	1	GAATTGGCTTCAAATGAGGTGAAAAATGAAGAAAAAACTGAAAATTGGTGGAGAAAAGAT[A/T]GTGGACGGCAAGAGAGGGGAGGAGAGGAAAAATAGAAGTATCAAAATGAAAAATTGGGTT			A	T
1637	TM1637	A1	71290349	1	CATTAAATATAGGGTTACATGTGTAAGACCATAGTTCGGCTATGGAAGCATGTGAAGTCC[A/G]TAAATCAGTAAACTAGAAGGCCCGCCAAGGATTAAAGAAAAAGACACGTTGTGACTTGCA			A	G
1639	TM1639	A1	71491374	0.965	AGCTCAGAAATGCGATGATGTGTTGATAGCTAAATAGAAACGAATTGAAATGACTCCTGA[T/A]TCAGACTTTCAGATTGGATCGAATGATAGTTTACACTTCAAAGGTAGAATTTGCATACCA			T	A
1640	TM1640	A1	71537131	0.996	ATAATTTTTTGACCTCAGATTTGTGGTTCCAAAACCACTGTTCTGACTAGGGTCTAAATC[A/G]ACCTGGTAAAACTCTCCCCCTTAGGGATTTTCGTCCCCGAAAATCTTACCATTGATTAGA			A	G
1641	TM1641	A1	71753898	0.996	CAGCTCTCGCCCTATCCCTGTGATACCTACACGCCATCTTGGCCCACACTCTGACGGGAC[A/G]ACGAGAGAGCACCAGCATTGTCAACACTCACGACGTCTATTTCCTATGGAGCATGGCAAA			A	G
1643	TM1643	A1	71964236	1	ATCTCATCGACCACACGGCCATGTTCTATTACACAGCCTGCCACATGGGCGCCCACACGC[C/T]TGTGTGGTGTCGTCAATCCACCTTCCAGCTTTTCAGCCTTTCAGTTTTTCGGTTTTTCAG			C	T
1644	TM1644	A1	71987124	1	TGATGGCATATTAACAATCAGCACAAAACTGAGGTCCAGAAGTAGTAGTAGCAGGGGTCC[C/T]TACTCTGATTGGCCCATCAGCTCTGGGTCTTTTCTTAAACCTCTGAAAGGAATTTGAGGG			C	T
1646	TM1646	A1	72045764	0.976	CCGCTATCTCCATTCCATATTGGCTCACACATTGACCGGAAGGAGAGAGAGCACCAGCAT[T/C]GTCACCACCCACGATGCCTACTATTTATGGTGCATGGCGAATGCACACGTGATTGACTTG			T	C
1647	TM1647	A1	72050611	1	TTTCTTAAACCTTTGAAAAGAATTTGAGGGCTCAGCATCCCTCTTACCTCTGACGTTCTC[A/G]CTATTTTGACGCTCAGCGCGCGTCATACCCTCGGTGATTTTTGCCTTATCAAATAGGGCT			A	G
1649	TM1649	A1	72125982	1	CTTACTCCTTAGGAAAACCTGCAAACCAACCGAGTCTTATCCATCATCCCCCTATAGAAA[A/G]AACTAGAGAGAGAAAGAGAGAGAGAGAGTCATAAGTACTTACCAAAATCAAGAACACAAA			A	G
1650	TM1650	A1	72253888	0.915	TAACACATATAGGCTCACTCTCAAGCTATTCACAGGCCTGCTCACACAAGCTGTCGGTCA[T/A]GATATAGCTACACAATGCTGCTTACACAAGATGTCAGGTATCTGCAACATATATCGGAAT			T	A
1651	TM1651	A1	72351555	1	AACTGAAACAGATCTGAGCATGGGTGATTAGCTCGCTTCAATGATCATAACTAACTGTCA[C/T]TATGGGTTCCCTGTTCAACCAACTAGTCGTTACCCTAGCAGGATCTCTCGATCATCTACT			C	T
1652	TM1652	A1	72552764	1	AACTTGGAGGAATGGATGCCAAATTTTTGCAGTAGGACCGAACGACGATGCTGCTCCTTT[C/T]CTCTTCTTCGAGGTAGGGATGGCAGTTTTCTTGCCACGTGGATTTCACATGGTATCTGCA			C	T
1653	TM1653	A1	72575656	0.996	TGTTTAGTGAACGTGTGGTACACCGAGTCTCTGCGCCAATCCTGTAAGTTCTCTCTAAAA[A/G]CTATATTTTGATTTTGGCTGAAACTATCATAGGTAGGATTACCTAGACTACTGTAGGTAG			A	G
1654	TM1654	A1	72675905	1	TGTCACCCTATTTCTAAGCGCGCAATCAACTCCGCTTAATTATGGAAGATGTACTCTTAG[G/A]CAGCGTCTATTCCTCCTCTGAATAAGAGCGTGTCTTGAATTAGTATCCTGGGATATCAAA			G	A
1655	TM1655	A1	72952527	1	GGGTACAATAAAGGTCGCATACGAGTTCAAAAAATAATTTTAAGGGGTGGAGGATGAAAG[C/T]CAGGTGGCACCACTGTTGTAAAAAAGAAATGCTAACTCATAACTGAGAAGTAGAAAAAGA			C	T
1656	TM1656	A1	73017099	0.965	TCATACATATGCACTAATTAAGTGTCTGTTAAAAATTTACATGTTGAATTCACTGAAATT[G/A]TGGTTAAAGTTTCAAACCTCTTGGACCAGTATGTTATGGTGGATAAAGTTTGTAAAAACT			G	A
1657	TM1657	A1	73026624	1	CATTGGATACGATGACATGTTACTGGAATTACTGTAATGGTCGAGCACCTGCATTTGTTG[C/T]GGACTCACCATAGCTCGTAAGAGCTTACTGATTTAGCTCATTGGAGCTTACCGATTCAAT			C	T
1658	TM1658	A1	73114129	1	CACACGGCCACAAGACACGTGTAACATCCCGATTTTAGGCCTAGTCAGAACAGTGGTTTC[A/G]GGACCACAAATCCAATGAGGAAAATTTTGTTTTTATTATATTTTCATGGTCTACAATTTC			A	G
1659	TM1659	A1	73123134	1	ATAAGGCCAACCTGGGTGGAGCAGATAAAGGAAAAGCAGTTGGAAGATGAGTCTTTGGTC[A/G]CTCGTTTTCAACAAGTTAAGGAAGGGGAACTTCTGAGTTCGGTTTAAATGGTGATGGAGT			A	G
1660	TM1660	A1	73372017	1	CCACACGGGTACACATATGGGCATGTGTCTAGACTGTGTGTCATACATGGTCTACCCCAT[A/T]GGCATGTTGAATGGCTATGTGTCCCCTGCACCTAAAATTTCTAAGTCAGTATGCATGGTA			A	T
1662	TM1662	A1	73544435	0.949	AGTGGAGAGTTATGGCAGGGTGGGTCCAGTTAATCCCCACATGGTGTGTTGGTTGGTACA[T/G]GTGGAGAATAGCGGATGGTGGGTTGAGTAGTCTCCCCAAATGGGCTTGCATTCTCTCATT			T	G
1663	TM1663	A1	73667636	0.949	TGGGCGTGTTGCACGCCAGTGTTAAATTCTCAGTTTCAACCACGGTTTCAAGGCACGGGC[G/A]TGTCTCACGCCAGTGTTGTTTTGGCAGTTTTTCCCATGGCCATGTCGCACGGTCGTGGCA			G	A
1664	TM1664	A1	73691120	0.996	CATTGATTTGCTCCCTTGGGTTAGATTTAGTGTTACTAGGCAGGCTACCTTGTGGTCGTT[C/T]AGATATCAATTTAGCGAGCTGACCTATCTGAGTTTCGAGCCCTTGAATCGACGCTTGTTG			C	T
1665	TM1665	A1	74024522	1	GGGGGCAATTTGAAAGGCTTTGCAAGGGACACGTTCTAAATTTGAAAGGTTTCTTGACCG[C/T]GAGGAATATATTCTGATTCTATTTGGAAAACTTTAGCCTCAATAAATGGAAACCAGGTGA			C	T
1666	TM1666	A1	74028108	0.935	CTTTAACTCAACAAGTTCAAATCAACTTACCAATTTATATTTAGTCACAATCAACGATAA[T/C]ATTATTGTAAGTACTTACTTGTCAAATTCGCGTCGTATACATCCGTATGACAACTCATTC			T	C
1667	TM1667	A1	74051124	0.965	TCCAAAATTCCTACTTGGAAAAATGACAGTTTTTCCTTAAACTTTCTCATTTTTACAATT[C/T]AGTCTCCAGGCTCGTAAAGTAATTTTCATCAAATTTCCTTATGAACCAAGCCTAGCCAAA			C	T
1668	TM1668	A1	74070266	1	GCCATACTATCATATTACTTATATGGCATATATAGCTAGACTTGTACACACACTAGGTTA[G/T]TCCTAGAATCGACTAAACCATGACTCTGATACCACTAAATGTAACACCCCTTACCCATAT			G	T
1669	TM1669	A1	74166823	1	CAAAAGCCTATTTAAACACCTAAGAAGGCACTTAAGAGGAGAACGTAGAGTAGGAAGCAA[A/G]GAATTACTCAAGGAAAGCCGATTGATCCATCTCAGAAGCCGGATTCATCATCAAGACTGA			A	G
1670	TM1670	A1	74180336	1	ATAATTGCGAAACTTAAAAAAAAACAGAAATTAATCCTCGTGGCCACTCTGAATCCGCCC[A/G]GCTCCAAGTCCACCAACTAGGGCTCACCTGCAAGGATGGAAGGGAAAGGGGTGAGTTTGG			A	G
1671	TM1671	A1	74204695	1	CTACTACCTACAATAGTTTCAGTATTTCAATTTAAACAAATAGTAGTTTTAGAGAACTTA[T/C]AGAGTCGGCGTCGGAGACTAGGTGTACGACACATTCAATAAAACATTTCCAAGTATTTCA			T	C
1672	TM1672	A1	74293067	1	GGTCATTGGAATGGCTAGTGATGAATATTGTAACACCCCAAACCTGGTCTGGACGTTATG[C/G]CCAAATCTGGCGATGTCACATTGAAGTGTTTTTCGTAAAGTGAGATATCATTTAAAAACC			C	G
1673	TM1673	A1	74516006	0.996	TAAGCCATTGGATGGTTCAGCTTGGGTTGGTTTCTGAACTAGTTGGGGAAAACTAGGTGG[C/T]TGGGTTAGTCTAAGTTGGGCGTAAGTGTTACTAGTTCCAACCCATTGGTTACTCTAGGAA			C	T
1674	TM1674	A1	74528391	1	GCATAAAAAATTCGGCCATAGAGGCTATATAGAGGTGCCGAATGTGAGGTTGCCAGGCTA[G/A]TGCCGAGTTCTCCCTCACCTTGTTGCTAGAAAGCACATTTTTTTTCTCCAAAGATCTAAA			G	A
1675	TM1675	A1	74562526	1	TAGGAAATTCGACCATATAGGCTATATATAGGTGCCGAATGTGAGGTTGCCAGGCTAATG[T/C]CGAATTCTACCTCACCTTGTTGCCAGAAAGCACCTTTTTTTTTCTCCAAAGATCTAAAAG			T	C
1676	TM1676	A1	74591417	1	TACTAAGCATTCATTGCTTACATAGTTATTTATGCAATGCCCCAAACCCGAGACCGTCGC[T/C]AGAGTTGAGCACGAGGTGTTAACGGACTTAATTCATTAATTAAACAGCTCAAACAATTCA			T	C
1677	TM1677	A1	74610349	0.996	TCAAAATAATAAGAAAGTAAAATTTTCTACCTCTGATTTTTGGTTTCGTAACCACTGTTC[C/T]GTTTAGGCCCTATTTCGGGATATTTCTCCCCCCTTTAGGGATTTTCGTCCCCGAAAATCT			C	T
1678	TM1678	A1	74634338	0.965	ATAGAAGAAACAGAGTTGACAATCACTACATGATATACTTACCAATAGTAGAGAAGCACA[A/G]AATTCGGCCAACCAAACTAACCGGTTAACACAGAAATTAAATGATGAACAAAAGAAACAG			A	G
1679	TM1679	A1	74681896	0.976	CTCTGCTACATTCATATGATATTCTATTTAGGTTGCATAAGGGTTGGGAATTATGGAACG[G/A]ACGAAGTATATGAGGATCGCATGGTTGCTTGACGACTGTGGATCCACCGATGGCTATTAA			G	A
1680	TM1680	A1	74706153	0.988	TTCTATTCCCTTCTCAGTGTCACAAAAAGCTGAAAAACGCAAAGTTAGATCTTCTGAGTG[C/T]CGAATTCTTCCTTCTCTTCTCCTCACTTCTTCTATTTTCTTTTCTCCTTCTTTTCTTCTC			C	T
1681	TM1681	A1	74780475	1	TGCCTGTTTGACCAGATCATGAGACTGTTTAGGAGATAGAGATCAGGATAAGTTCGCCAA[C/A]TTTGGGTAGTGATAACCCAGACCTTGGTACTGATGCACTGACTCGGTTAGTAAGGGAGCT			C	A
1683	TM1683	A1	74872545	1	TATGACTCTTCATAAGTTTCCCAATATGGCTCGCTTGAACTTCCTGATATATAGCTATCC[G/A]GAGCTTTTTGATAATAGCTCTTCGGAGTTACCCGTGAAGCTCACATGAGCTTTTAGTTCT			G	A
1684	TM1684	A1	74923677	1	ACCATCTAGAATTACATGGGATACTCGGCAAAGCTCACACGAAGTGTGCCTTTACATATA[A/C]CTGTAACATTTCCTTTACATCAATGCTCACACGAGCTATGAAATGGGCTTGCTCACACGA			A	C
1685	TM1685	A1	74948498	0.988	CTAGACCAGGACAAAGCCAAGCAATCCGAATATGCCGACTAGTCAAGAACTTTTTGTAAA[C/T]CGAGGTAAGTTGTATGTAAATAATACAACTACACTATTAATACTTGTATTCATATTTTCA			C	T
1687	TM1687	A1	75004958	1	ATCGGGAAACTCTAACTCCTCCATTAATCACATCCCCATCCACTCGTTAATCTCCCCTAA[A/G]GAATTTAGCCACTCATGTTATTCATTATCTCTAACTCAATTGAATAAATCATATAAGGAA			A	G
1688	TM1688	A1	75045830	1	GGGGGATTTTCATTCGGGTGAGCCATTTGTTTCCAAAAATAAAGAAACTTAATCAAACTC[G/A]AAAATTCTAATGATCGGAAGTCTGTCCATGTTCACCGCACCAATTGTTGAGTACTATTTT	Gh_A01G1260	utr	G	A					A01	75046487	75050914	+	AT2G01350	quinolinate phoshoribosyltransferase	P77938	NADC_RHORU Probable nicotinate-nucleotide pyrophosphorylase [carboxylating] OS=Rhodospirillum rubrum GN=nadC PE=3 SV=1
1689	TM1689	A1	75101601	0.988	CAAGTATTCCCTCTCTTATACTGTTTGAGCTGAATATCCCTTTTTCCTCTTCTTTGACAC[T/C]GTTTCTCATCTCCTCTCTCTTTTATTTATGGCATTTTTTTTCGGGTTCTAGAACTTCTCG			T	C
1690	TM1690	A1	75116054	0.976	GGTGCTTCTGTCCTCTTGATTCTAACCTTCTTAGTTGCACGACCAACGCCACTATTCGAA[T/C]CCGTAATGCTCTTCCCGACCACCAAGTTCCTTGAAGATAGAGGATCACTCATGGCTATCA	Gh_A01G1262	utr	T	C					A01	75116471	75117582	-	AT2G01340	0	Q6NLC8	Y1648_ARATH Uncharacterized protein At1g66480 OS=Arabidopsis thaliana GN=At1g66480 PE=1 SV=1
1691	TM1691	A1	75267551	0.976	ATGGTCGTGTAACAACCCTCATCCATATCCCAGGCCAGGAAAGGGTACGAGGCATTACTA[A/G]ACTTATACATATGCATACAAACAATTTCGGGTCATAGAATTTCAATCAAATTTAAAACAT			A	G
1692	TM1692	A1	75338455	1	ATATGAATGTGTTTCAGGTTTGATTCAGGGTATGACCTGATGGGCAATCTGATAGTTATC[G/A]AACTCAGTATAGGAACCTGCCAAATGCAAGATCAGTTAGTAATTATCCGCCAAAGAATAG			G	A
1693	TM1693	A1	75498045	0.976	TCCACACGATCTAGGCCTTCCTACACAGTCCGGTCACATGGTCGTATGTCCCCTATTTTT[C/T]AGATTTTATAATTGTTCCCTTTTTTTTAGAATTTACATTTTGCCCTTATTTTTCATATTT			C	T
1694	TM1694	A1	75501642	1	AGTTTTAATTAGCTGAATTGAACTCAATTGAATGTGTGTGTCTATTCGGCTGGGGCTTGT[C/T]TCATGCCTATAAATACCTTGTTTCCAGCTTGATGTAAGGACTTTTTGCCAAATTTTATAA			C	T
1695	TM1695	A1	75504439	1	ACATTAAGTTTGGGTTATATCAACTGATTCCTCCAAGTGAGGCTCCAACATCTGCTTAGT[T/A]TATTGACAAGAATGGATGTCAATTTCTCCCATCTTGGCACAAGTTATTCTCGGATTGGCT			T	A
1696	TM1696	A1	75509085	0.915	ATTTTAGCTTCGAATTGACCACACGGATAGAGACACGGCCGTGTATGACACAAGGTCTGC[A/G]CCATGGGTATGTGATATGGCTGTGTGTCCCCTGCATATTAAATTTTTGTTTTGAATTGTC			A	G
1697	TM1697	A1	75511944	0.988	TTGAATACTTACCATTTCATTTCCTTTTATTACCTGTTGAACCATATAGAATTACATTAG[A/G]TACTCGAGAAAGTTCACACATAGTGTGCCTTTACATATAACCGTAACCTTTCCTTTACAT			A	G
1698	TM1698	A1	75515209	0.935	TCTTCACTTCATTTACGCATACTTGCTACATCTCGTCACATAATAAGGCCTTATTCATAA[G/A]TTTAGTACACATATCTGTAATCACACGTAAAAATAACTCAAGTTCATTCTCTCTAATGAT			G	A
1699	TM1699	A1	75527056	0.976	TTTTACAATTATTGATCTTTTTGCATGTGTTTGCTGTATATGTTTGTTATCTTGTTTCCG[C/T]ACACATTGCATTTGCATGACCGTTGTGGTCGCACCCTTAATGGGAGTGAGAAGCTACGCT			C	T
1700	TM1700	A1	75530218	0.996	CCGGGTTTTACCCCACCTTATGTGCAGACTCAACCTGAGGCATATCCCCGAAGGTCGTCT[G/A]TCATAGTAAGACCTCAACAGGGGCAAGTCGATGCTGGAATACCCATGAACTTTCAAACTG			G	A
1701	TM1701	A1	75600294	1	GGAGGAATAATTCACCCTGAGAGAGGGTTGCTCGAAAAAGGAAGTTATCACATCAATGCT[G/A]TACATAGTGAAGAGTCTGAACGAAGAAACCTTGAGTGCATTCGCCCTTACGAACCAGGGA			G	A
1702	TM1702	A1	75604772	1	CTTCAGTTCAAAGGATAATTGGACAATTCAAACGATTCAATCTTAAGGGAGGATCGTCTC[T/C]AGCAGGTTGTAACGTTCAGAGAATGGTACAATAGGACCAATCTGATTCAAAAACACATGA			T	C
1703	TM1703	A1	75612562	0.935	ATATAGTTGCGTTTTGATAACTAAGCATGACTTCTTCTTCCAATTGAACTCGGATTACTT[C/T]AGGGATATCTAAGTCATTTTACCCTTTTAAACTTAGCTTATTTAAAAGGGCCCTTGTATC			C	T
1704	TM1704	A1	75620175	1	GCAGAGACACGGCCATGTGTCTCAACCGTGTAGAGGACACGGCCTAGTACACGGGCGTAT[A/G]CCTTTGCCTTGTGACAATTTAGGAATACTGATGTCAGAAACAGACTACCCAGGTTTTTGC			A	G
1705	TM1705	A1	75629929	0.965	GAACCTAAGAGTATGTTTGGTTGGATGGAATTGTAACAGCCCATTTTTTTAGTGAAATCG[A/G]AACAGTGATTTCGAGACCACAAATTCGACCTAAAAATCAAGTTTATTTTTATTTCATTAT			A	G
1706	TM1706	A1	75633742	0.976	CAACACGCCCGTGTGGCCCTTTGACATGGCCGTGTTGATGGCCTGTGTAACACACACGGC[C/T]TAAGCACCTAGGGACACACCCATGTCCTGTGCCCGTGTGAATTAAATTCCAAATTCGAAC			C	T
1707	TM1707	A1	75640935	0.935	CAATTTGGAAAAACTGCCTAAACACATGCATTCAATCAAACATGTTAGTCACAAAATTTT[T/C]AGATACATCAAGTAAACACAGATGAGCTCATCATGCAATATTCTTTCAAGACATTGTCAT			T	C
1708	TM1708	A1	75643519	1	TAAAAAGGTAGAGCCAATTACAGCTAATTCTACACACCCAAGGTGGAAATAGTTCAAGGT[T/A]TTGGAGTGAGTTCTATATATAGCTCGTACATAATTTAGTTGATTTAGATTTAAATATAGT			T	A
1709	TM1709	A1	75649599	0.965	CCGAAGGCCACCAGTCTCCTTTAACTTACCTAATACATCTTGATCTGTCATATGCAATCT[T/C]ATTGAGTCTTCAGTAACCCCAAAAGAAGTTCCTATTGATTCGATGAATTTTAGCTAATGT			T	C
1710	TM1710	A1	75663166	1	CCATAATACAGTACTACAACACCCAAACCGTACATCGGGGGTGGTTCAGGATTAAACCGT[T/G]AACTTTAGAATTTTTTCTTAAAACAGGGTCACACGCCCGTGTGGACACAAGGACATGCCC			T	G
1711	TM1711	A1	75769804	1	TTCTGTTGGAAGGAAGCTGCAGGCAGCACTCTTATATCCCTGGAAAGGAAGTGCTAAATA[T/A]ATCAAGTGCTGTTAGTTTAAGTGTCTTGTATTAGAAGTATGCATAGGTGGGAGGTGTTTC			T	A
1713	TM1713	A1	75795236	1	AAAATGTGGTTTTATAAATGACATTGATGTTCAACCAGAAGGATTTCGAGGGGGCTTAGT[C/G]TTGCATGGAATAGCAATGATTTGATTAGCATTCGGATTTTTTCAAAAAATCATATTGATG			C	G
1714	TM1714	A1	75831854	1	AGGGTTGAATTCTACGAGTGCATCCTTGGTCGAAGTCTTGATTAGGCAAACAAGTCAAAG[A/G]AAAGTGGTAGTGTATTTCTATCTGCCCAAATGATACTTTGGCGGATAGATTGGGCGAACT			A	G
1715	TM1715	A1	75835573	0.988	CAATAGGCTTTTTATAAGCTTACTGAAATGGCTTTGTGTGAACTTCCCGTTATAAGGCTC[G/A]AGAGTGTGTTTCTCGATTATGTGCCGTAATTGGGTACCCTTGAAAATAAATTGATGAATT			G	A
1716	TM1716	A1	75838778	1	TCAGTCGTGTGTGCTATACGGCCCAGAACACGAACGTGTGCCTTGGCCATGTGAAACCTG[T/C]ACCTAATTGTGAAAATTAAATTAACCACATGGCCTAGCACACGAGCGTGTGACAGACCGT			T	C
1717	TM1717	A1	75846900	0.988	ACACGCTCATGTGCCAGGCTGTGTGAAATGTAATGCCCCGTACCCGAGACCGTTGCCGGA[C/G]TCGAACACGAGGTGTTAACGGACTTAATTCATTACTTAAACAGCTCATACAATTCATTTT			C	G
1718	TM1718	A1	75849507	1	CACTAGCCTATACATGCCATAAAACCAAGCCACAATGTGTAAAATACCGAAAATCAATAG[C/T]CGGATAGTGTGATGTGATCTTCGTTGACTCCCAATATAACATCCCGGTTTAGACCCTAGT			C	T
1719	TM1719	A1	75853290	0.965	TCACTTTTACAATTTAGTCCTCTCTTGAATCGATATGTCATAATATACTTCCCAGTGGCA[T/C]AACTCAACTTTCCTCTTCTTGTCACTTTATTTCCTTATTTTACTATATTAAGGATAATAT			T	C
1720	TM1720	A1	75856087	0.9	GCAAGTGTTGGAAATGTCCAATCCGATAGATCCGAGTGTAAACACTGTGGTAAAAGACAT[C/T]CCGATAATTGTAGATTGTATGATCGGGCTTGTTTCAAATGTGAATCTTTAGATCATTTTA			C	T
1721	TM1721	A1	75865779	0.988	TAAAGCATCAATTCATGAGCTAACATCAAATTATTCATGTCATCCTTCACAAGTTCTCAA[T/C]TTCATATAACTCGATACTTGAGCAGCTTTCCATACATACCTGTACTGGTACCTTTCTATT			T	C
1722	TM1722	A1	75876908	0.965	TCCATGACCCTTAGACACGGATCTAGATCTAGATGATGCTACCCCGCAACTGAGGCTGGC[A/G]CGTTACTTTCAACATCATCAGAGTCTACTCGATTTGGATCCATTTCTATATGAAAAATAT			A	G
1723	TM1723	A1	75895376	0.965	TATTTACATATTAACTTACCTTGTATATACGATGAACGGATCAGATCAACTACTCGACAA[C/T]TTTCAATTTCCCCCGATCTAAATCCAATTTCTTTCTTTCTTGATCTTATTTAAGAATTAA			C	T
1724	TM1724	A1	75897710	1	TGCTTATGCCTTCTTGATATTAATTGAATGAAGTATCAAATTTGTGGTGGGATGTTAATT[G/A]AAAGAGTTATTGGTGTTGTGGTGGGACGTTAAATTGGAAGAAGTATCGGTGTTGTTGCGG			G	A
1725	TM1725	A1	75900239	0.915	AGTCTTGCGAGTGTGCGAACACTCACAAGGGGGAAAACGATAGGTTTCCTGGGGCCCATG[G/T]GCGATTCCATGGACCTGGGTTGTGAATTGGCCAAATGGGCTAGAATGGGCTAAATGGGCT			G	T
1726	TM1726	A1	75903891	1	GAGAAAATTTAGGAAATAGATTGGGGAGTTATCAGGGAGAAAAACGAGGAGATGAGAAGA[A/G]GGAAGTGATGGAGCCGAAATGGGAATTTAGCCATAAGGATTTCGGCTATAGGGGCTATAA			A	G
1727	TM1727	A1	75909280	0.965	GCCAATTCATGTTTTTGCACATACCAATAAGTTGAACGTTTCAAAATCATTTAAGTATTC[A/G]GTAATAATATCATCTTGTTCGGGTCTGGTGACTAGATCGAGATTATACATATCGTCCCTT			A	G
1728	TM1728	A1	75915453	1	TACACAGAGAACGAGCAAGAGGATGATATTCAAACCACAACCAAGGAGATGGATGAAAAC[C/A]AAAAAAATCCGCTACCTCCTGCGATTGCTGTTAATCAGAATCCTACTCCGCGCACTATGT			C	A
1729	TM1729	A1	75922409	0.988	CAGAATGTTCATAGTATGGTAGACATCATTTTGTTGTGTGTCGAGGTAATGAAAGATGTT[A/G]TTTTAAATGTGGGTCTTTGGACCATTTTATTCATGACTGTCCCGAGATGATCGAGAAAGA			A	G
1730	TM1730	A1	75927303	0.949	TCTGGTGTAACACCCACTAACACCAAGCCATCACTAGAATAGGGCTACGAGGCATTACCG[G/A]ACTAATACACTAATAATTATACAAAACCGAGTCATAAACTTTACATTTCAGATCAATTCT			G	A
1731	TM1731	A1	75931797	0.935	CTATGAAATGTTATAAGAATAATATTGTACGATAATTAGTTGAGGTTTATTTACATGCAA[C/T]TTACTAAGCTTTATGCTTACCCCTATTTCCTTTCCATTTTCTTATAGTGCCGCCAAAGTA			C	T
1732	TM1732	A1	75941770	0.935	CTTAGCAAGCCGTCTTATTTGATTTTTGAGCCCTTGAATCGACACTTGTTGATTCTTAAG[T/C]GCTGTTACGGTATTCTAAAAATGAGTTTCTGACACTGAGATGAATTTTGTAAGCATCTCT			T	C
1733	TM1733	A1	75944191	1	TCAAAACCCTTAAAATTAGCCTTTTCTGAGTAGAATTAGACTTGGCCTCGACAGGGACAC[A/G]GCCATTGCCATGCCCGTGTAAAGGTGCTCAGGCCGTGTGTAATTCTGACTTGGTTTAGTG			A	G
1734	TM1734	A1	75950063	1	TGAAAATGGTTCGGCTAGGCTTGGGTGTTGAAGAAGTTGAATACATTTCATTTTACGAGC[C/T]TACGGACTAAATTGTAAAAATGAGAAACATTAGGGGTAAAAATGTAATTGTTGCCATAAT			C	T
1735	TM1735	A1	75960239	0.949	TGATATCGACACATCTAGACGTAAAGAAAAGGGTCGACGTCCTGGCTTTGAGTATTTACG[G/A]CATGGTGATTTTCCCAAAGGTGTTGGGGCACATAGATGAGGCAGTTGCGGATTTGTTCGA			G	A
1736	TM1736	A1	75968672	1	GAAGGACATGCAGAACCAATTGCAAGAGCAATTGGCAAAGATGCAAAACGACATGAGGGA[T/G]AAAATGTTGGAGGCATAAAGGAACATGATGGCTGAGATAACCCAACTTCTGAGGGCCACT			T	G
1737	TM1737	A1	75974669	1	GTACAAACCCACAGGCTGAGTAGGAATGATACTTCGAGAGAAATAAGGACAAACTTTGAC[G/A]AAAGAATGAGTGGTGACGTCTGGAATAGGGTCATATTCATAAACATTTTGCATTATAACA			G	A
1738	TM1738	A1	75982426	0.965	TCAAAAGGTTAGTAGGTAGCCAAGGATAAATGTAACACCCCCACCCAACGCCTAGCCGGA[C/T]GATCGACCAACGGAGAGGTTACACGAATTTAAATTATAACTTGAAGCATTAATTCTTGCA			C	T
1740	TM1740	A1	75988056	0.996	ATGATGTAAAATTTTCCGAGAGGCTCCACCAAGAGCTGATCCAAGTCCTATGTTTGAGTG[C/T]TACTTGAAAAGTTGAAACACTAATGGGGTGAGCTTTTTTTTAGCCAGTCTGAGATTAACT			C	T
1741	TM1741	A1	75997190	1	TGTGGACTAAAATACCCATAATTAAAATTTTTGATTGTCGCCCGGTGTCACGACATTATA[G/A]GACCAATGTCGTGAAACTGCCTTTCGAATGGGAATATTGTGGCTTCGAAGTCTGGTGTTT			G	A
1742	TM1742	A1	76001605	1	TGTAGGTGTCGGCCATCCATTCTGTTTTGCGATGCAAATCAGAATGTCGCCCATGTCTTG[C/A]ATCCACCATTTCTGCCACTCTGAGATAGGTATGGACGTTAGTCCTGTCATCTTTGACGTG			C	A
1744	TM1744	A1	76014113	1	CTTGCTTCCTACTCTGTGTCCCATTTCTAAATGCCTCCTCAGGTGTTTAAATAGGCTTTC[G/A]AATGCCTAAGGGCCCCCAAAATTGGCCTTTTTTGAATAGGGTTATACTTGGGCTCGACAG			G	A
1745	TM1745	A1	76022548	1	CATCTCAAAAGCATAAAGATGACAAAAACATAAGAAAGCCCAAAACTCCTCAAGGAACTT[A/G]AAGGGAGATCTTCAGTCTTGATGATGAATCTGACTTCTGAGATGGATCAATCAGCTTTCC			A	G
1746	TM1746	A1	76028531	0.965	GTTGTGATGTAATTTCGTAATATGCATACCATGGTGTTAGATGCTGACTTGGTCTTGATT[A/G]ATTAATGTCTACTCTGAATAATTGTTTATTTTCAGATTTCTCCCTATTTCTTCAATATCC			A	G
1748	TM1748	A1	76043769	1	CTAGACTCATATATATATATGGTAAAATTTTTTTAGAATTTTTGGTCGGGCCAATTGGTA[A/C]ATTTTATTAGTTAAAGTCGTCCCTGTTCCTGGATTCGACTACTCTGACCTTTGTGCATTA			A	C
1749	TM1749	A1	76051749	0.949	ATGCCCTGTGGGGACATCTGGCCAATGAGAGTGAGGGAGGATGATTATGCTGCTGTGTTG[A/C]GGAGCCCGAAGTGCCGAGCCAGTCGAGTCACATAGAGCCCGATAGAGATGACCTCTCTTC			A	C
1750	TM1750	A1	76060272	1	TGTATGTAACACCCCTAACCTGTATCCATCACCAGATTAGGGTTACGAGATGTTATCAAT[C/T]AAAAACACAATTTCAAACATTCACTTACACATATTTGCGGTAACTTTTTTTTTATAAGAT			C	T
1751	TM1751	A1	76065092	1	CTCAAACAGCCATCAGCTTCAACTCTGAACTCTGAATCAGCATCCATTTCACACTGAGCT[C/T]GTTTTGCAATTAATTCATTATCAACCTTCTAGGTATCACATATTTGTTGAATGAATAACA			C	T
1752	TM1752	A1	76070995	0.996	ACGTCGTAAAACGGGACAAAGCTGCTAGTCGACAACTTTCGTTTTTTCCCGGTCCAAATC[C/T]GATTTCTTTTGTTCTTGATCTAAACATGTTCAAATTAATCTCATTCAAATATATTTTCAT			C	T
1753	TM1753	A1	76074725	1	CTCCTAGAAATGCGGGAAATATGAGTAGCAGTCAGAGAGGAACTAAAGACACAGCAATTC[G/A]ATCTGAGGCTCGTGCACCTGTCAGACCTTATGCTATTCACGCTCGTGAGGAGGTTTCAAA			G	A
1754	TM1754	A1	76079360	1	GTGTATGTTTGCCTCTGTTTTATAGATATGGAGTCAAGTTACGAGCTCGGGGATTGTCAG[C/T]GAAGTTTTTTACACTATCGACTATTTTGGTACTTCTAGAAGTTTGAATTTAATCCTATGG			C	T
1755	TM1755	A1	76085262	0.935	AAATGAAAATGTTATTTGGATTGTGGTAAATCGTTTGTTAAAAGTCCGCATAATCATTTC[A/G]GCATGTACGGATTCCTTATTTTGACAGATCGGTTGAATATATGTGTTTTTGAGAAAGTAA			A	G
1756	TM1756	A1	76093552	0.935	CTTGTTAAACCGCTCACGGGCCTGTACACAAGGTCAGTACCTGGACCCACGTTACCTATA[G/T]CATTTATCTCATGAACTTAGACTCAACTCATGAGTTCAGACCACATAATTTTCATAACAT			G	T
1757	TM1757	A1	76098442	1	AATGATTTCGACCACAATGCTGGTATTTTGGTTTGGAAGATCTGACATTACCCACGCTAG[T/C]CATTGATGTAGCCCGAGACTTAAAATTTGAATCTTGTTTCCTACAATCTCGATATGAATG			T	C
1758	TM1758	A1	76110719	0.965	GTATTGACCATCATCCATGGGCTTAGACAAAATGAGTATCATATTCATCATATGAGCCAA[C/T]ACATTATGGCTAACTAACAAAACACTAAAAAAAGACTCGAGTCCCTATACATGCCAGAAA			C	T
1759	TM1759	A1	76114327	1	TTTATAGATTATCAGAAGCTTGATTTGGTTGGAAGCTCGTCGAAGATCTATAACACTATC[A/C]AGCAAATATTGGTAGTTTTTGAATGTTTTGGCCAAGGTTATAATGGCATGTATAGCGTAA			A	C
1760	TM1760	A1	76118887	0.996	CCCCCACGCCCGAGACCATCGTCGGAGTCGAGCTTGAGGGGTTACCGAACATAATTTATC[A/T]AATTAAGAACTTTAAATCATTTGTTTCTACATTCATAGCTTTCTAGCTACCCGCATCACG			A	T
1761	TM1761	A1	76125247	0.935	TTATGTTTGAAACCTTGAGCCAAAATTGAGTTTGAAACTCAATCCTTCATTATTCCTGAA[A/C]TTTGTATTGCACTATCAAATAGACATCAAGACACAGACATTGAAGGTTAGGTGGGAACAT			A	C
1762	TM1762	A1	76130426	0.965	TATGTGTTGATTGAATGCTTGGAGATTTGATGGCATGTGATATTCCATTGAAACGAGTAA[A/G]TTGTATGTAAATAATACAACTACATTGTTATTATATGTGTTTAAATTGATATAGCATGAA			A	G
1763	TM1763	A1	76133057	0.996	GGTTTTGAATTAAAAGAGATTTTATGGCCAGGTTTTTGCATGAATGTGTATGTTTAAGTC[C/T]GGTAATGCCTTATACCATGTTCTGGCGTCAGACATGGGTAAGGGGTGTTACACCGTAACA			C	T
1764	TM1764	A1	76135660	1	ATTTCATATTCAATTGAGTTTTTGTACATACCTGTACTCATTCGTAACATAACTCAAGTT[T/C]GTTCTCACCAATGACATACCTCATTGGGACCATCATCAAATCTTTCCTTAAATTACCTGT			T	C
1765	TM1765	A1	76141275	0.949	AATGTCAAGGTTTTTAGACATGGGTTAAGACACGGGCGTGTCATGGCCGTGTGAGGGACA[T/C]GGGCGTGTCATGGCCGTGTGAGGAACACGGGCGTGTCATGGTCGTGTGAGGGACACGGGC			T	C
1766	TM1766	A1	76153965	1	TTATCTTCCCATTAATTTTTATAAAAGGAGGAGACATTTGTTGGACATTCCTACTTTTTG[A/T]TCATACTGAAAACATACCCGACAGTAGCTTGAATCCTCTCAGTAGGAGTTGCAGTCAAGG	Gh_A01G1278	intron	A	T					A01	76149961	76155323	-	AT1G27320	histidine kinase 3	Q9C5U1	AHK3_ARATH Histidine kinase 3 OS=Arabidopsis thaliana GN=AHK3 PE=1 SV=1
1767	TM1767	A1	76177515	0.935	TTTTCTTGATGATTTTAGTACTTTTAGAACCCTTGTAACATGAGCTTTCAAATGAAGGGA[C/G]TATTTTGCAAAATGGTTGAAAGTATAAGGTTTTACCATGAGTGTGCTCATGTTGTTTTCT			C	G
1768	TM1768	A1	76179788	1	GTCTTGATGATTCGAAAAAGTTATAATGCATGTGCTAAGTGAGGTGACGCCTCGTAACCT[G/A]TCCCGGTGTAGGACTCAGGTGTAGGGTGTTATATTTAGTGGTATTAGAGCTATGGTTTAG			G	A
1769	TM1769	A1	76192181	1	TCCAAAATCTGAATTTTGAAATCTAGAATGCTTGTTGGTAGGGCCACTATCCAAGTAAAA[A/G]TAAGATGGAGGATCCTATCTTGCAAGTTGAGCTCACCTACATAGTTGTTAGGGTAATAAG			A	G
1770	TM1770	A1	76211083	0.935	TCACCATGTGTCTAAAAACAACAATCCCTGTTCTTAATTGTAACAACCTACTTTTGGGTC[A/T]AATCAGAACAGTGGTTTTAGAACCACAAATCTGAAGTAGAAATGTTAATTTTATTATTAC			A	T
1771	TM1771	A1	76216265	0.965	TGATTGAAAGTTTGTTTTCATTGTTTGTATTCCCGATCAACAAATTTATCTTCTTTTTAC[T/C]TTACTACCCTAACGCCACACTTCTACTGAATTTTATTTCTTTTCAGCCTACCCTACACCT			T	C
1772	TM1772	A1	76234128	1	GATTGGGATAAGGCACGGGGCATTACCGAAAAATATGGGTTATAAAATTTCATTTCAATT[G/T]AAAACCGATCAAACAGAATCGTATTTTCCCAATTATGGACCTACGAGGTCCATAACATGC			G	T
1773	TM1773	A1	76239315	0.988	TAGTATTAATCTTAGATGTGCTCATCAATTCAAGCATTTCTATTCTCATTTCTAATTTTA[T/A]ATCTGTTGAATTTCTCGGGATCTCGATGGGTATCTCATTTAACGTCAAATCATGCAAGTG			T	A
1774	TM1774	A1	76241646	1	AAGGACGCAACACCGTAACATGTTCTTGAGAGTCTGAATCGTCTGCTCAAACTGACCATG[T/C]AACACCACAAATTTAGGCCTAAAAGTATTGGGCCTTAAGTGTGGGTCCGTAAGGAGGTTG			T	C
1775	TM1775	A1	76310866	1	CTGAACGACAAAATCGTGAGAAGGATCGACCCAGATTTAGGAGGGATTCTGGACCCCCAG[T/G]TGTTGCAAATAGGAATGCTAAAAGAGCTAGAACGAGGAACCAGTTCGAGCAGTTCCAGTG			T	G
1776	TM1776	A1	76316051	1	TCGTTGGAACAGGTAAGGGTAAGATTTTGTGCACGAAGTTGAGATGGGCCTCGAGGGGCT[A/G]AAATCGGGCCCAATGAGCTTTCGGGCCCATTTGGGGTAAATTTTGATAGAAAATGGAACT			A	G
1777	TM1777	A1	76319891	0.988	TCGCAAGTCACTATCATTAATTTGAGTTGCTCAACTTTGTTGGAGAAATGTCGGTCTGGC[A/T]CTTAACTCCGCCAGAACTGAACCATCATCAGACAGCGCCAATCGTGTGTTCATAGCCTTC			A	T
1778	TM1778	A1	76324758	0.965	GAACACTTCCTCCATCAATATAACCCATATCCCATGCAACAAATATACATGTCATGGCAT[T/A]CAACATACAGAATCAGAATATCATGTCCATATTTGAATCAAACAATCACAGTCAAGTCAT			T	A
1779	TM1779	A1	76332764	0.935	TTTTGTTGCATTTTAGGACATTTTAGTTAGAATTTTTAATATTGCATTAGGACTTGGACT[G/A]TGCTAGAATTAGGTGCTTTTAATCGCTTACGATAGAGTTTTTAATAGGGTTAGAACGAGG			G	A
1780	TM1780	A1	76338233	1	TGACTCGGGGATCGTCAGCAATTTATCACACTATCGATCTTTTTGGGTACAGTTATATTT[C/T]GGACTCGATATGGCATGTATAGGTTAGGCTGATGATAACGATGTTTTGAAATTGTAAATA			C	T
1781	TM1781	A1	76346795	0.935	TTACAATTCATACGATATTAAAGCAATTAAAGCATAAATAACGATGCATTATTTACATAC[G/A]AACTTACCTCGGTACAAAAATAGTAGAAAAGGATCTAATCATCAAACACCTTATTCTTTC			G	A
1782	TM1782	A1	76351152	0.935	TAGGAAGTTTCCTTCCTTACATATGAATCTAACTCTTATGCATGTAAAACTAACAGTACG[C/T]ATATAACCATGAAAATAACCTACAGTTCATCAATATTTATCAGAGAGCTAAAACAACATG			C	T
1783	TM1783	A1	76356893	1	CCCTCCATCTTTTCTCCTTCCTTTTCCCAGTAAGGCCTAATCTCAGCATTCCAATCGTTG[C/T]GAGTCTGAAACGAATAGCGTAAGTGTGGTTTAAACAAATCTAGTTTTTCCTTTTTAGATT			C	T
1784	TM1784	A1	76360269	0.996	GGATAGTGTTCGTGATGCTACCTGACTTAAACTCAACCAACTGTATAAAACTGGGCCGCG[A/G]AATCTCAAACGATTTAAAGGCTTGTCTTTTCACAAGCAGTCTGTCTCATATACGGGCTTA			A	G
1785	TM1785	A1	76364067	1	GATAATCACTTGGGTGATACGCTCAAAGTGTAGCAATATACTTTCATGGGTGAATGTACT[T/C]GTCAAACCGTTCATATTCACACATAAACATCTCATATTTACATATTCTATTTCATGTAAC			T	C
1786	TM1786	A1	76369238	0.965	AAATGAAGGGTTTCCAACCCAAGCCAACACATTTGGCAAATTCTCAAAGTCACAAAATAA[A/T]AAAGTATAGGTCCTGTACATGCCATAATAAAAAATATAAATCCAACTATACTGAATACTT			A	T
1787	TM1787	A1	76377889	1	AAAGAAAACATCTCAAAAGCATAAAGATAACACACATAAGAAAACCCAAAACTCCTGAAG[G/A]AAATTGAAGGGAGATCTTTAGTCTTGATGATGAATCCGGCTTCTGAGATGGATCAATCAG			G	A
1788	TM1788	A1	76380315	0.965	TTAAGTCTTCTACTACGTTGAAACATATGCTTGATTTGGAAGCAAATGAGATTGTTGATG[C/T]ACCCACTACTAGGGTTTGAGAATCAGAATACTAAGGATGTTAGGTATAATGCAGTAACCC			C	T
1789	TM1789	A1	76389101	1	TCTATCTAACCCGATGAACTATAGTAACATAACTCAGATTCTTGGGTAACTACACCACAC[C/G]AGAGAGCATCGTAATGCTATTCAGAGACACCGAAGTGCAATCCCGTACAAGCGCACGTTT			C	G
1790	TM1790	A1	76398207	0.988	GAAATCGGCTCATTTTATTCTGATACATACTATAACATCCCAAATTAGGGCGGCCTACTC[G/A]GAATAGTGGTTTTGGGACCACAAACCTGACATAAAATATTTGTTTTATAATTGTTTTAAA			G	A
1791	TM1791	A1	76402395	0.988	GTGGCCAACTTTGAGTCGCTCGCAGCACCGATCCACCTAAGGATTACCTACGCAGATAAA[T/C]AGAAGGGTGAGTTTACGAAAACTCAGTGTGTATTCCCATATAAGCAAACAATCTGAGTAA			T	C
1792	TM1792	A1	76407268	1	CACTTGTATCCTAATCTATTCCCAAGGTTCAAGCAGGATTTTCCTCAATCACACATCTTT[G/A]CCGTCTTCCACGGAATGTTGGAACTGATACTTGGTAGCATTTCATATTTATCAAGTAGCT			G	A
1793	TM1793	A1	76414905	1	TCAAATACTTCCCAGAACACTTAACCACTGCAATAGGTACACAATTGTGTCACTTTCTTG[T/C]ATAACTAAATATTTATGTGCAGTCTCCCATCTACACCCACTCAAGACTTAAAACTTCTAG			T	C
1794	TM1794	A1	76424668	0.976	CCTAACCATTTCTACTCCTTGCGGAGCGAATGGGGTATACTGAGGAATCGGAGGAGGTAG[A/G]GGAGGTGGAGTGTTTGGATTCGCACGAACAAACTCTGTGTACCAAGCGTTCATCATGTGG			A	G
1795	TM1795	A1	76428633	0.996	GTATGAATGAATGAAGTTGTCTTAAAGAAAAAAATTTACAGCTTTAATTTTTGCATGAAT[A/G]ACTATGTATGTGTTCAATAATGCCTCGTATCCTATGCCGGCCTCGGGTAGGGTAAGGGGT			A	G
1796	TM1796	A1	76432238	1	CCTACACAAGCGTGTCCCATATCCACATGGGCATGTGACCCCTGTTTAGTGAAAAATTTT[C/T]TAAAGTTCTCGGTTTAGTCCCGAACCACTTCCAAAGCATGTTTTGGGCCTCATAGGCTCG			C	T
1797	TM1797	A1	76436888	0.949	TATAGACAATTATTGAAAAGTTTTAATTTGATCGAGTTTTTATGATTTGGTTATGCTCAC[G/A]TGCTTGTATTTAAGTCGAGTAATGCCTCGTACCCCGTCCTGACCTCGGACTCAGGTAAGG			G	A
1798	TM1798	A1	76441520	0.949	CAGGAAGTGGGGCTAGCAGTAGAGGTACACCCAGAGATCCTAATGTGATGTCCAAGGGCA[A/G]AACGCCTGCAAGGACTTATGCTATACGTGCCTGTGAAGAGGCAGAGTCTCCCGATGTGAT			A	G
1799	TM1799	A1	76463079	1	CTAAGATTTGGCGCCCTTGGGGTTTTCTATTTGATTGTATCGAAAGGCCCAATGAATTAG[G/A]ATTTCCCTATTGGGCGAGGTCATTTCGAGGCAAACGGATCATTATGATGAAAATGATGAG	Gh_A01G1279	utr	G	A					A01	76461188	76462152	+	AT1G27330	Ribosome associated membrane protein RAMP4	Q6TAW2	SERP2_MOUSE Stress-associated endoplasmic reticulum protein 2 OS=Mus musculus GN=Serp2 PE=3 SV=2
1800	TM1800	A1	76468237	1	TATTCGAAATACCGATATCATGTCTCGGAGCCAAATCAACCAACATTCATGGCCTGAAGC[T/C]AAATCAGCCAACATTCATGGCCCAAAGCCAAATCAGTATAACTTGCACCCGAAGTGCAAA			T	C
1801	TM1801	A1	76471315	0.988	ATCAAATGAAATATAATGGCTCGATAAAGACCCCATACCTAGAGCTAACATCATATAGCT[T/C]AGCTGAGACATTATAGAATAGGCTAATCCCCTCTTAATATCTTTTTGGGCTGGCTAAAGT			T	C
1802	TM1802	A1	76485086	0.988	TGATTCTTCTTTCGAGGTGACAACAGCTGCCATTATTAAACAACTCATTAATAACTACAA[G/C]TAATGTCACACTAACTTGAGTTTGACCTCTACTATGTTGGAATATCCACTTTCAGCTTAA			G	C
1803	TM1803	A1	76490016	1	CATCAAACTCTTAGCCACTGAGTCGAGCAAAAATAAACTTTTTCACCCACGCAAGGATTC[A/G]AACACAACACCCTAAGTAGATTGACACTCCACTCAACCACCAGACCAGCAGGCCCATTCT			A	G
1804	TM1804	A1	76497366	1	GTAAGACTTGTTTGGGACATGGCATCGACACCGATAAATGAGAGCCAATGTAAGAGCTGT[A/C]TAGGACACAACATTGGCCTCGATATATGAAAGTGAGTGTAAGACCTGTCTGGGACATGGC			A	C
1805	TM1805	A1	76500847	0.935	AACAATTCACCTGTAGTATTATCATCCATGTCGGTAGTGAGATATTTGAGAAAAGAGTAT[G/A]AAGCTTACCTCGCTTTTGTATTGAATACTTAAGCATCTTAATTGAAAATCGAATCAGTAC			G	A
1806	TM1806	A1	76506554	0.988	ACATGGGCGTGTCATGGCTGTGTGAGGGACACGAGTCATGGACACGGGCGTGTGTCTGGC[C/T]ATGTAAAAGCCCCTGTAGGTTCAAATTTGGAATTCAATCCACATGGGTTTGGGGCACAGG			C	T
1807	TM1807	A1	76508782	1	TTTTCTTAGGCCTCATCCCAGAATTCGAGGGCTCTAAATCCCTCTTATTCTTGCCTCTCT[C/T]CTTATCCCATTTTTGGCACTCAGTGCGCTTTACTTCTTCGGCGATCTTCACATTCTCAAC			C	T
1808	TM1808	A1	76523749	0.949	AGCTTCAATAAACGGTAAGTTAATATGTATTTTTTTTAAGAGTTTAAGGAATTTACCAAA[A/T]TTTTCATCTGAGCGGTCTTTCCTTGTCGCGTTGGGGTATGGCACACGAGGTTTATATTCG			A	T
1809	TM1809	A1	76529849	1	CAACATTTATTTTTAAACGATGGTGTGACGTTTTCTAAGGTTTAAGGAAAAATTGCACCA[C/T]ATAGAAATTAATGTGAGGGAAGGGATTCGAACACTAGTCATCAAGGACAGCTCCACCACT			C	T
1810	TM1810	A1	76534174	0.965	ATTAAGTCCTGACTTTATTCTAAATCTCATAGAAAACCTTGAGGGTCCATTTAAGGGATG[T/G]TCTGAATAATCTCAGAAAATGAAAAATAATTGACATGATCATCTGTAAATGTTCTAAAAA			T	G
1811	TM1811	A1	76542095	0.965	CTTACGTTTCAGAATTGTTTGATGACTCATCAATTTCTGGTTCTGTTGGTTCACTCAGTT[C/T]AGGTGGGTTTAGTTCATGGACATTCTCTATTAACCTTTTAAGATCATGTGCTCTGACGCA			C	T
1812	TM1812	A1	76549338	0.988	ATGAGTTGTCGTGTACACCATCAGAATGTGTTAAATGTGCTGTGTCTTTTCTAAAAGATG[T/C]TGCATATCAGTGTTGGAATACTTTAATATCTGAATTACCGAGAGACTGGGTCACACAGGA			T	C
1813	TM1813	A1	76555225	0.988	ACCCATCTATTTATCTGTATAGGTAATCCCCAGGCTTAGGAGGGTCGGTGCTGCGAGGGA[C/G]TCGAAGGCGGCGATACAACTGCACGTAATTCTATATTTACTTCTTTTAAATTATAAGTAA			C	G
1814	TM1814	A1	76561062	0.965	AAGTTTGATTCTAAGTTTTACGAACTTACTAAGCTTCAGTGCCTACTGCGTTTATTTTTT[C/T]GTGTTTGTAGTGTCTTGTAAGCTCATTTGGGTTGAAAGCCATATAGAATTGCATCATACT			C	T
1815	TM1815	A1	76567593	1	TCACCTCGGTAAGGCAAATGTGGTTACCAACGCTTTGAGCAAAAAGTCTTTATTTGTTTT[A/G]AGAGCTATGAATACACGGCCAGCCCTATCTCATGATGGTGTTATTCTCGTAGAGTTTCAA			A	G
1817	TM1817	A1	76579262	0.965	CCTCTAAGGTGTATTTATAGGCTTTGGAATGCCTAAGAACCCTTGAAATTAGCCTTTTTC[T/G]AATAGGACTCAACTTGGGCTCGGCAGGGACACGCCCGTGTGGGTCGTGCTTCGAATCTAC			T	G
1818	TM1818	A1	76581475	0.915	AAACACTGCTGCTCGAATCGAGTGAGGTGCTCAGAAATGTCAGCATGTGAAGCCGCCGCA[G/T]GAACTGGAATAGAGGATGGTGGTGGCTGAGACAGTGGGTTCTCGTGCTGTGGAGGGACAT			G	T
1819	TM1819	A1	76589079	1	ACCATTCACAAAAGCTTCTACCACCAATCTTGTGAGTAACACCCCTAACCTATATCTGTC[G/C]TCGAAATAGGGTTACGAGGCATTACTGATCAAATCATAACATAAAACATACATTTCATCA			G	C
1820	TM1820	A1	76591603	0.996	ACAGTGATGACATGTTTTGATGATCCGAGAATGGTCCAATTTCGCCTCGGCAGTCAAGTC[T/C]GCCAGTTGAGCGTGGAGGAGAATGAGCTCCACACTCTCAATCTCCACATCCATCATTCTC			T	C
1821	TM1821	A1	76596542	0.965	GGATTATTTTGAGATATTATTGATAGAAATTATAAGTTGAGAAAAATTTATTTTGATTAC[A/G]AGTTGAGGATTTTGCTTAAGGATAAGCAAATGCTTAAGTGTTGGGGTATTTGATAAATCG			A	G
1822	TM1822	A1	76603341	0.915	CTTGATCGGTCTTAAATTGAAATGAAATTTTATCGCCGTATTTTTTGAAGTGTCCCATTT[T/G]TGTATGGTAATGCCTCATACCTTGTCCCGGTCTTGGGTTCGGGTAAGGGGTGTTACAACT			T	G
1823	TM1823	A1	76623564	1	ATATTTAATTGTTCAGAACCGTGTTTTATTCTGTAATGCCTTATGACCTTATTCCGGCAA[T/C]GGATATGGGTTAGGGGTGTTACATTTAGTCACTCTCCCCCTTAGGGATTTTCGGCCCCGA			T	C
1824	TM1824	A1	76631722	1	TTTTCTAACTCAGATTCGTGGTCCCGAAACCACTATTCCGATTAGGGTCTAAATCAGACT[A/G]TTTCATGGTCTGAGACACGACCTACAATATAGCATTGTGTCTCAAAGTAGTTTGTCACAT			A	G
1825	TM1825	A1	76643879	0.965	TTTCATATTTTATTCAGCCTCTAACTCAATTTCCACAATTTTTGATGGATTTTTAAAGTC[G/A]GACTATGGCTGCTGTCCAAAACTGTTTTAGTGTAAATTAATGGTACTATGTTTATCACAC			G	A
1826	TM1826	A1	76712769	1	TGAGCTTAGGATATTGATAGCTCCATAGAGGGAACGTGGTTTTGCTGCGTTGGTAGAGAA[T/G]GCTAAGATAGTCGAGGAGGTAAAGCGGACTAAGAGGCTGAATCGTGAGAAGGATCGACCC			T	G
1827	TM1827	A1	76716954	1	GTAAATGGGCTTATGGAAGGCCCATGTGCTGGCCAAAACCCGGTTGAATTTTTGAATTTT[A/G]GACTTAAAAGGTTAGGGGCTTTGGATAGGTGGTCTTATTAAAATTTGTGGGTGAAATGTA			A	G
1828	TM1828	A1	76724535	0.935	ATTATGTGTTCTTAATTCTTGTTTTGATATCCCAGGATACCGATTCAAGATAAGCTCTTA[C/T]TTAGAGGAGGAATAGACCATGTTTAAGAGTACATTTTTCATAATTAAGCGGATTTGATTG			C	T
1829	TM1829	A1	76726940	1	AAATCCGAACCTTGAGGAGATGATGACAAAATTTATTTCAGTAGCGAAAATCTATTTTCA[G/A]AACACTAAAACTGCACTTAAAAATCAGCAAGCATCGATTCAAGGGCTCGAGAATCAAATT			G	A
1830	TM1830	A1	76733165	1	ACAGTCATGGCAAAGCATGACGACCCAAGAACAGTCCAATTCTGCCTTGGCGGTCTAGTA[C/T]GGCAACTGAGTGTCCCAGAATTTAGCGTTGCTTTGGGACTATATATGAACGAGTTCATAG			C	T
1831	TM1831	A1	76746950	0.935	TTTATATAATTGACGGTAGAGAGAAGTGATTGTAATAAATCATTGATAAACCGTAATTTA[T/C]ACGTATTTTTACCCCATGCTTAACGCATTTTATGGATGATTTTTCCTTAGAATTGGTGAA			T	C
1832	TM1832	A1	76752757	1	TACGGCACTGGGCTTATATACGGAGGAGTTAAAGGAGGAGAATGACTTAGATACTCTCAA[T/C]TGCCATATCCATCATTCTCCTTCACGGTGTTGGGACGCACTAGTACCAGGTGCAGCCGCC			T	C
1833	TM1833	A1	76756891	1	CATGGTTGAGAATCAATTCTAGTTCACTTGGATTGGAACTAATTGGTTCCTTAGTGGGAG[A/G]CTAAATTATTGTCAATGGATGGCTGTTATACGGTGGAAGATCATGCGTGAAGGGCTATAA			A	G
1834	TM1834	A1	76767990	0.965	GTACCCGAGTTGGTTCCGAGTGATTTACGATGTGTGTTTTTGGTTATGGATATGTTGAAA[A/G]GTTTGAGAGAGTTTTAAATTTGTCCAAGTCTTGGAGACTCGAAAATGGTTGTAAGCACGA			A	G
1835	TM1835	A1	76775395	1	TGTGAGCCACATAGGCCATCAACACGACCATGTTGAAATGGCCACACGGACGTGTGCCCC[T/C]TTCACATGGGCATGTGCCCCTATGTCAAGTGACATTTTTCTATAGTTGGAAAAAGTACCC			T	C
1836	TM1836	A1	76780210	0.935	TTCTCAAGAGATGCTTGGTTTTGGATGTTAAGTTTGATGAATGACCTAATTGATGCATGT[C/T]TAGTTATGTTTGATGCTATTAAAGATAGTGATCAAGAACTTGCATGAATTGTCAAGTTAA			C	T
1837	TM1837	A1	76785907	0.976	ATTTGATATTAAATTTGACATTGTGTTTTCTTGGACTATTATTTGTAGCTAAAGACGACA[A/T]AGGGTCGTCAAGAGGGAAAGGAAAGGCAAAGCCGACGATGAGTAACTCAAGTTTTCAGAT			A	T
1838	TM1838	A1	76795859	1	AACCTTAATGACTCCACAACCACTAGACCACATCCTTCTTTGTGTCATTTATTTACCACA[A/G]TAATTTAAAAGGCCTTCATCCAAGCACCTAGGGTTTTATTCACTTAAAAGCAAAATTTTT			A	G
1839	TM1839	A1	76816792	1	AATCTTACCCTCTACTTTCCATTTCCTTAGTGTTTCCAAGTTAGCTCGGGGTTGGAGATC[A/G]TTGGAGGCAGCATCACACTATCAAGCCATCACCTTTGGAGTATTGACATATGTGTATTAA			A	G
1840	TM1840	A1	76819544	0.976	GATCAAGTCACATGCCCGTGTGCTAGGCCGTGTGGCGAATTAAATTCCAAAAATTGGGTG[G/T]AGACTTCACATGGCCTGGGCACATGCCCATGTCCTGAGGTCGTGTCCTTCACACGACCAT			G	T
1841	TM1841	A1	76826761	0.965	TGGTTTGGATGTGAAGTACATTTTGAATTAGTTGTGCAGGATTTTACGTGTGCATTTAGG[T/C]ACCAAATTGAATAGGTTTGATTTGGACATGAAATGGGTACCAAAATGGTGGATTTTGACA			T	C
1842	TM1842	A1	76835863	1	CTTACCTGGTTTGGTATGAATGTTTATGTTTAAGTCCGGTAATACCTCGTACCTTGTCCC[G/A]GTGTCGGACTCGGGTAAGGGGTGTTACATATATCTCTTGTACCTTGAAGATAACGAAAAA			G	A
1843	TM1843	A1	76844000	1	TAACGTCACGACGTGAGGAACTGCCCAAAGATGTCTTGAGGTGACTAGCTATGAGGTCGC[G/A]TTGTGTAAGGATCTAAGTTCACGACCTAGCTGATTGCGTTAACATAAGGGAGTTGAGTAA			G	A
1844	TM1844	A1	76850390	0.988	AGGACAACATTAAAACTTTTGAAACAAAGAACGGCAAACATGAAAATAGAGGTCACACGG[T/C]CGTGTGTCTAGGTTGTGTAACTAACTGTGGTTCTGTGGATAAAAAATTACAAAATCTACA			T	C
1845	TM1845	A1	76854124	0.996	ATATCTCAAGGCCGATGCATGTCCCAGACATGTCTTACACTAGCACACATATCACCCAAT[G/A]TCTTGGCATGAATATCCAAATCTATTACTAATGTTCAACCGGAAGTTTTCATTATACAAA			G	A
1846	TM1846	A1	76858062	0.988	GGCAAAGTATTCGATCACACTATCAAAAGACTATTGGGTATAGTGAAATTATTATTTTGA[G/C]TATGGCATGTATAGGACAGTTGGTCATTTTGTGATATGTGTCATGCTATTTGGCCAATTT			G	C
1847	TM1847	A1	76868951	1	GAGTAGACACACGGGAGTGTGTCTTGGCCGTGTGTGACACACGGCTCGTCCCATAGGCAT[A/G]TGGTCCATCCATGTGTCCCTGCATCTTAAAAATGAGAAACAGAATGCTTAGAATTGAGCA			A	G
1848	TM1848	A1	76872833	0.965	TTTATTTTATTAGTTAAAAACATGGAATACTATTATATAATGAATTTAAAATGAATGTTC[G/A]GGTTAAATGAAATACGAGATTTGAGTACCATCGTTTGTGACAAAGGATGAATTGACGGAT			G	A
1849	TM1849	A1	76879838	0.935	ATGCTTTTATAAGATATTTTGATGATATAACTTGTGGTGCCAATGAGGGTACATTGGTTA[A/G]ACACCTAAGATGATTGTTTTGGCATGTTTTAAGTATGTTGGATCGTGTTTTGAACAGGTT			A	G
1850	TM1850	A1	76896831	1	TGGGTTGCTATGCCAGGTGTTCTGCCCGTAGCTTCGGGGGTATTCACGTTTGGCATATGC[T/C]TGCTTTGATCGAGATCTTTGGAGATGATTCTGTACTATAATTCGGTGGACGAACTTTAGG			T	C
1851	TM1851	A1	76901505	0.935	TATTCTTCTGTTGCTGCTGGAGGTAGTGGTGGTTCTGCCTCAGATTTGGGCCTTGCTTCT[A/T]TGTCTAAAAGTTCAAAATCGGCATCTATTAATTCTTCTTCTATGGGGGAGGTAAAAATGA	Gh_A01G1281	exon1	A	T	ATG	TTG	M	L	A01	76901283	76903938	+	AT5G43270	squamosa promoter binding protein-like 2	Q9S840	SPL2_ARATH Squamosa promoter-binding-like protein 2 OS=Arabidopsis thaliana GN=SPL2 PE=2 SV=1
1852	TM1852	A1	76910192	1	ATAGGAAAGGGGAAATCTGCTGGAAATGAATATTAGGGAGCAACTTGATAAGGGAGTGGC[A/G]AATACAAACTGGTTAGAGCGATTTTCACATGCTTCAGTTCGAAATTTACCATATTTTTTC			A	G
1853	TM1853	A1	76912846	1	TTGGATTGGTATTTTGATTGATATTTGAGTTTCTTAAGGTCTAAGCAATGAAGTGGTAAA[C/T]TTGTGTTTTAAGGTTCATTTTGAGACCACATGGCCTGAGACATGGGCGTGTGTCTCAGTT			C	T
1854	TM1854	A1	76916100	0.976	CTGTGTTTGGGTGCTGGTTCGTACGTTCTACTGGTGGTTGAGTTTTCTGGCATGTGTTGC[G/A]GATTCTCGTCAGCTTGTGTGAGCAGCACCGCATAGCTACGTCTTGACCGTGAGCTTGTGT			G	A
1855	TM1855	A1	76920023	0.976	ACATGGCCATGTTAAGAAGATACACAGACGTGTAGCCCTTCCACACGAGCGTGTACCTCT[G/A]TCAGCTTGAAATTTTACAAAGTTTTCTAGAGTACACAGATTAGTCCTGAATCAACTCCAA			G	A
1856	TM1856	A1	76923938	0.935	TGATAATGAATTGCAAGCTAAAAGAGTACAATGCGAGTTGACTACTAATTTGGAATATCA[A/G]ATCAGATCCGATGAATGTTTACTATCTTGAGGTAGAATTTGTGTAAAAGAAAATCTGAGC			A	G
1857	TM1857	A1	76926613	1	CCTATTCTGATGAGGAATAAGGGTTAGGAGTGTTACAAGAGCACCTACTTGCACCTTTAC[C/T]ATTCGAGCCAAGGAGGAAGCTACTGCTCTAGATGTGATTGCTAGTATATTCTATCTCTTT			C	T
1858	TM1858	A1	76932119	1	AGGTATGGAATTTACGAGATTTCATAGAACCACGTTTGAGAGAATTCGAAAGTAAGGAGC[C/T]GAGGAATATAAGGCCAATACTGATGATGACCCTGAGAAAACAGAATCCTGGCTCGAGAAT			C	T
1859	TM1859	A1	76935905	0.988	AAGAGGACGGTGAGCAAGTCACTTCCATTCTAGTCTAAGAAATCCAGAGATACGTATTCT[T/C]GTTCTTATGTTTCAGCTGGCCATTCTTATAGAATCCGTAAGAAGCAAAATTCAAGTTTTA			T	C
1860	TM1860	A1	76939160	1	TTTTGGATCACATTAAATAATGTGACTAATAATTAGAGTAAATGTGATATTATAGATCAA[T/G]GAAAACGAGGATTGGACATAGATCGAGTGAAAAATGGAAAATCGACGGTTGGGTTCCTTT			T	G
1862	TM1862	A1	76948661	1	GGGACACCATTCATGTGTTTGAAAAATTTTAATTTTTATGAAATTTTATGGCCCAGTTTT[T/A]TGAAATAATGTACGTTTAAGTCCGATAACGCCTCGAACCCTATCCCAGCATTGGATACGG			T	A
1863	TM1863	A1	76954034	1	GATTATAGCTTAAGATAGTTATTTACCCTCGAGGGGCATAATCGTAAACTTACCCCTTCA[G/A]GGGTATTACGGTAATTCTACCTTACAGAGGTGTTTCAGTAATTTTATCAGTCTTTTTAGG			G	A
1864	TM1864	A1	76956525	0.965	CTTGTAGGCCATATAAAGGACAATTTGCATATGTATGAATGAAATTGATTTGAAAAAAAA[A/T]TTTATGGTCTGATTTTGTATGTGTGCTTGTGTTAAAGTCTGGTAATGCCTCGAACCTTGT			A	T
1865	TM1865	A1	76965382	1	GGTCGATTAAGGTAAACACAAGGTTTCGGAGTAACCGAAACATAATCCCGAAAAGAATAC[C/T]AGGAAAGTTCGGATAACTTAAAGTAAACCCCTAATATGTATAATTGCATGATTTATGAAT			C	T
1866	TM1866	A1	76967725	1	AAAGAGCTGAGTTTTGGCTCGAGAACACTACGCGGGTGCTAGATGATTTGTCATGCACAC[C/T]CGAAGAGTGTTTGAAGTGTGATGTGTCCCTTTTGAAGGATACTGCATACAATTGGTGGAA			C	T
1867	TM1867	A1	76983497	1	TGGCTTATCTGAGTTTCGAGGCTTTGGATCTATGCTTGTTGATTTTTAAATGCTGTCTCG[A/G]TGTTCTGAAAACAGGTTTCTGACACTGATATAAACTTTGAGAGCATCTCTTCAAGGTTTG			A	G
1868	TM1868	A1	76988170	1	GCTACCTGATCAGTGAAAAGTGGTAGCTTCGGCTACCTAATCAGTGAAAAGTAGTAGCTT[A/C]AGCTACCAGATTAGTGAAAAGTGGTAGCTCCAGCTACCTAATTAGTGAATAGTGGTAGCT			A	C
1869	TM1869	A1	76992930	1	TGTCACCTTCGTTTTAGGTAATCACCTTATCCACTTAAGATTTACTCATTGAACACATCG[A/G]AATATGATTCGAATACACGGATTTCATGCATATAAGTGCCATACCCGCAGCTAGGCAAAC			A	G
1870	TM1870	A1	77007921	1	ATTTATATGCAACTTACTAAGCTTTATGCTTACTCCCTCTCCTTTCCTTTTCTTATAGTG[T/C]TGCCTATCTAGCTCAAGGATCAACGGAAGTCAGAGATATCAATCACACTATCAAAAGAAG			T	C
1871	TM1871	A1	77016410	1	AATAGGGTTAATCACTCTCTTCTTAACACTTAACCCAAAACAATATTTGATACTTGCCTT[G/A]ATTGAACAAGTGCAGTTTAGCCTGCTTAAACCACCGACGAAGGTTGATTACAAACTTCTT			G	A
1872	TM1872	A1	77023104	0.965	AAAGGGCTAGTTCCATATGGAACTATCATATGAGAGAAATAGTAAACTCAAATAGTCACT[T/C]GGATGACAATCTACTGAATACTATAGACTAAAATGGTCCACATCAAACAGATATGTGCCT			T	C
1873	TM1873	A1	77039309	0.996	GGAGTCTAATTCTCTAGGAGCCTGTCTGTCTTTGTGTGTGTGGATGGTGGGTACTAGGAT[A/G]GCATTATAGACTGGACTTGGGTGGGCTTCACCTCTAGTCCTTTGCTCTTTTTCTTTCTTC	Gh_A01G1282	utr	A	G					A01	77032638	77038863	+	AT3G13060	evolutionarily conserved C-terminal region 5	P59326	YTHD1_MOUSE YTH domain family protein 1 OS=Mus musculus GN=Ythdf1 PE=2 SV=1
1874	TM1874	A1	77041510	1	GTAACGTGAAACCAACCAAGTGAGCAGTTTCTAACTTTGTTCCACCGGAGTTATTATCAG[T/C]ATTCTCTGAAGCACTTGACGGTGTCCCGGTGGATGGCGTCGTCGGTGTTGAGGAAGAATT	Gh_A01G1283	exon2	T	C	ACT	GCT	T	A	A01	77041391	77042040	-	AT1G27950	glycosylphosphatidylinositol-anchored lipid protein transfer 1	Q9C7F7	UGPI5_ARATH Uncharacterized GPI-anchored protein At1g27950 OS=Arabidopsis thaliana GN=At1g27950 PE=1 SV=1
1875	TM1875	A1	77044722	1	GGGCACATGGCAGTGTGGCCAGGTCATGTGGAATGCTATAGACTGTGTAGATGGGTTATA[C/T]GGCTGTGTGACTAGGTCGCGTAACAGACTGTAGGCGTGTGAAAATTTCAAAATCAAGCTA			C	T
1876	TM1876	A1	77076151	1	CATACCTTATCGACTACCACATGTTTGCCTAATAGGTTCGACACTTTAATCATAAACTCC[A/G]TAGACTCAACAGGCATATTCATGTTAAACACCAACTTCATGCACACATAATGAGTAGAGC			A	G
1877	TM1877	A1	77080064	1	TATTGAATTTTGGTTTAGGATCATATAAAGGTTTATTAAGGAACATTAGAAGATTCACTA[G/A]GGTGTTGCGAGAAAGCGAAAAATAAGGTGTGGGTCCTAAACTTGTTAAATTTGTTTGATA			G	A
1878	TM1878	A1	77094910	0.935	ATCATGAGTAGATGATGAACTATGTATGTGTGGCTTGTATACTTTGATGTAAGTAAAAGC[C/T]TGAGTTCAGATAGATAACGAATCAAAAGTCAATGTGTTGGGTATATGACTTTTACAGTAT			C	T
1879	TM1879	A1	77100393	0.965	AAAAGTTAGTTTAGTCCCAACTTTAGGGACTAAATTGGAAAAAATGCAAAACATGCGTGA[C/T]TTTGTAATTGACTGTGATTTGAGCTAGAATTTAATATTATGTATTGTTGGATTATTATTT			C	T
1880	TM1880	A1	77105308	1	ATTCCTTCAAAAACAAAACTCTTTTTGCACATGCCCAGGCTTGAACCCAAGACTTCTCAG[G/A]CACTTCCCAGATCACATAACCACTGAGGTAGACACACAGTTATGTTACAACATACATAAA			G	A
1881	TM1881	A1	77108311	0.988	GTGTCACACACGGCGTAGACACACGCCCGTGTGTCTACCCGTGTGGACAAAATAAGGCTA[T/C]TTACCAAGCCTCTTTGCCAACCTTACTTACATAACCTACATAAGATCACTCTATACCAAT			T	C
1882	TM1882	A1	77119640	0.935	GCTCGTGTCCTAGCCTGTATGCAAAAACCTAGACATTTTTTTCTGACGTTAGCATTTCTT[A/G]AGGATCACATGGCCAAGGTACACGCCCGTATGCTATGCCGTGCCCTTCACACAACTGAGA			A	G
1883	TM1883	A1	77127666	1	GAGAAATTGGGGTGGTTCCTCCAACCTGCATTGTAAGTGTTACTATATGGATTGTTTCGA[A/G]GTCGAGGATTATTACCCATGTACTTTAATTGCTCGTTATCCATGTTGTGGCCATAAGGTT			A	G
1884	TM1884	A1	77129982	0.949	GTGCTATTACTTTAGGCCGTGCTCGAGCCTGTCAAATTGACATGGTCGTGTGGTTTGCCC[G/A]TGTGAGGAGGTCCAGGCCGTGTTGGTTTCGTACTTTGGCCAATTTTCTCCGGTTTTGGCC			G	A
1885	TM1885	A1	77135186	1	TTTACCTGTATGGGGCCCATGTACCCGTGGAGCACACACAACCCATTTCGGCCAAACACG[A/G]CCCAAAACAGCTTATGCCCATGAAATCGCTTATGGTACGATCAAACGCCTAAGTTTATTT			A	G
1886	TM1886	A1	77141918	1	GGCTTATCTCTTTTAAACATGTCTGCACTTTGCGGAGCTACCAAGGCATACTGAGAAATC[G/A]GAGGAGGTAGAGGAGGTAGAGTGTTCGGATTCACACGAACAAACTCCATGTACCGTACAT			G	A
1887	TM1887	A1	77147299	0.935	TTTGTGGACTGGATTGAATGTGTTGATGAATAAAAGAGTTAATTTTGAATGTATATAGAT[C/T]AAGAACGAAAGAAATCGGATTTAGATTAGGGGAAGTCGAAAGTTATTGAATAATCGATTC			C	T
1888	TM1888	A1	77155052	1	CCCTTCCTAAATCACTTAACAATTAGACTAAACATGCAATTGTAAAATATTTAAACACAT[T/C]TCATTTATTTAAGCCGCCTTCTAACCGAACCCAAACTCAAGGCCCATTACTTCTAGGCCC			T	C
1889	TM1889	A1	77197237	1	GGGGTAACCAATGATGTCATTGGTTTTCGATTATTCCCCTTTTCTTTATGTGATAATGCA[G/A]CTGATTGGTTGGATTCATTAGAGCCGAGTTCTATAACCATGTGGAACGACTTTGCAGAAA			G	A
1890	TM1890	A1	77373300	1	CCTCGTCCTCCCACTCTTTTCTCCATCCCTTCCAAACTCACTATTAATTTCGTCCTTCCT[T/C]AGGCTTCTGAGTTGACTGCCAAAGAGGTAACATTTGGGTTTTTTTTTTTTAAATTCTATT			T	C
1891	TM1891	A1	77376436	1	CTTAAAAACCTTTGGGAAAGACATCTAGGAAAAAAAAGAGAACATTCTTTTCATGGGTAT[T/G]ACAAGTCATGTGGCCTACTTGGTAGAAAATATGGCCCAAGAATTTCTAGACAACTGACAA	Gh_A01G1286	intron	T	G					A01	77375971	77387812	-	AT1G27880	DEAD/DEAH box RNA helicase family protein	Q0WVW7	RQL5_ARATH ATP-dependent DNA helicase Q-like 5 OS=Arabidopsis thaliana GN=RECQL5 PE=2 SV=2
1892	TM1892	A1	77379413	0.813	AAACTCTTACTTCTTTTCCTAGTTAAACTTTTGTAAACTAGTATATATGTATGAGATTCC[T/C]ATGAGTAAATACATAAGCTTTTCTTTCAAATTCTACCTCTGTTTCAATACTCATATTTCT	Gh_A01G1286	intron	T	C					A01	77375971	77387812	-	AT1G27880	DEAD/DEAH box RNA helicase family protein	Q0WVW7	RQL5_ARATH ATP-dependent DNA helicase Q-like 5 OS=Arabidopsis thaliana GN=RECQL5 PE=2 SV=2
1893	TM1893	A1	77381770	0.965	TAAAACATGGTGGTACAACATCTAATGCTAGCAAATCACAGCAAAAGGAAAAGTATGTCT[G/A]GAGATTCCCAAAGAACTAAACTGGTTCTCTTACTTAACAATTTTCTGCTAAGTGTCAGAT	Gh_A01G1286	intron	G	A					A01	77375971	77387812	-	AT1G27880	DEAD/DEAH box RNA helicase family protein	Q0WVW7	RQL5_ARATH ATP-dependent DNA helicase Q-like 5 OS=Arabidopsis thaliana GN=RECQL5 PE=2 SV=2
1894	TM1894	A1	77391546	1	TTAGAAACAGAATGTTTGGAAGTTTTGCATCATGTTAAGGGTACTCTGATGATACATGAG[T/A]CGGATTCGTATATCATTCATGCCATTCAAGACCTATTGCGTCGAGATCGGGATATTGATA			T	A
1895	TM1895	A1	77399545	1	CGAAGGTCCATCCGTGGTTCAATTGAGCTGATTTTTGGACAGCAGCTAGGCGATAATGTG[T/C]TCTTGACTTTGTACATTTGGATTTTTCATTCGAGCCTTGTAGCGTCGGAAATACCCGTTT			T	C
1896	TM1896	A1	77407855	0.965	CAAAATGTAAGTGTTATGACCTTAAAAAGTGAAACAGTTTTTGGAATCAGTACCTGGCAT[A/G]TGTCGTGATCACGACACCGAATGGGAAGAGTAGAAACAAGAACCAACAGCTCCCACAAAT			A	G
1897	TM1897	A1	77421561	0.988	ACTATGACACTATCCCGAAGGATAAATAAGACCATAGTTGAAAGATACTATGGCACCATA[G/C]CAGAAATGAGTAAGACCATGACGGAAAGACATTATGACATCATGATTCTATCGAGTAAGA			G	C
1898	TM1898	A1	77423691	1	CTACAGTTGGAGGAATATTAGTAGTAGTTGGAAGATTTATGGGACCTGTTGAAGTTACTT[A/G]TTCCTCGATAGAGCTAGGAGTAGATCTCTCTAATGCTTGATTTCAACAAGTCTCCTCCCT			A	G
1899	TM1899	A1	77426183	0.935	AAAATAAAGTTCAGATTTAGATCAGGGGAAAAATAAAGTATTGGACTAGTCGATCTATTC[C/T]GACGTTTTTGCGATCAAGGTAAGTTCGTATGTTAATAAGCATTATTATAATTGTGTTTTA			C	T
1900	TM1900	A1	77430143	0.988	TGTGGCCCCTTTTTCTTAAGATGCTAAATATACCTTATCTTATCTTTACTTGAACTGAAA[G/A]CTTAGCATTATATGCAGTTGTACCAATTTGCTTGCAGATCAATTCACGTGGCTAATAATA			G	A
1901	TM1901	A1	77433544	0.988	ATTTGCCAATGTTTTATGGTGAGATCATGTTGTTTGATATGGATGACTGTGTGCATACGA[A/C]TTAAGTACTCGATGATTGATTTTGGCATAATTGGCATATGGATAGATTATAGCATAAGTG			A	C
1902	TM1902	A1	77441004	0.988	AAGTCTTAAAAGATAGTGTAGTTTAATAGTTTACATGCAACACAAATAAATAAAAGTAAA[A/C]TTTGAAAACATGAAACTATGCATTAGAGGTGTCGTCCTCCAAGTTCGTTTCCTCAATTAT			A	C
1903	TM1903	A1	77451410	1	TTGTTGGTGCTAACCCTGCTCCTGCACCTGCCAATCCTGTATTAGTTAACCAAGGGTTGC[C/T]ACTGGAATGTCTTCGAGCGTTGGGTGGTAAATAGTTTTTTAGAGTGAAAGGTACTGATAC			C	T
1904	TM1904	A1	77454068	0.935	TTGCACTTAAGATTTGGCGTCATTATTTGTATAGGGAAAGGTGTGTTATCTATATAGATC[A/G]TAAGAGCCTTAAGTATCTCATTACCCAAAAGGAGTTGAATTTAAGACAATGACATTGGAT			A	G
1905	TM1905	A1	77463219	0.996	TGTCGCGTACTTAGCTATCCTCGTCAGGAGCTAGTCTGCATCTAGTTTTCACGTTGGCTC[T/A]CCCGTGAGAGGCTTAAGCTGCCATGGCCGCAAGCTTTAAGGTCGGATAATGAAGATGATG			T	A
1906	TM1906	A1	77467747	0.915	AAAACGGACCAAATCGAGAAGATGACACGGCCTAATCCTTGCCACACGGGCAGCTCACAC[G/A]CCCGTGTCTTTTGAGGGTGTCGACCAAGGATTTCACGATTCACACGGCCTGGCCATTGAC			G	A
1907	TM1907	A1	77471237	0.976	TGTAGGCACAGGAGAGCTAACACTTTGTGTAGGTGACGATGCAGTAACACTCCAAGCACG[C/T]GACTCAGTAAAAACCTCTAAGACTCAAGATAATGCTATAAAAACTGTCGATGATAAAACT			C	T
1908	TM1908	A1	77477388	0.965	TCTAGGCTTGAGTTCAAGATTATTAGCTTCAACCATGCTGTCATAATCGTCTAAGGATTC[G/T]AAATAAGATGTTATTGCAAACTTTTCAGAAAGTACTGTGCTTTGGTCATTGAATTCTTCC			G	T
1909	TM1909	A1	77480332	0.935	AATCTTCAGTAGAATACTAAGTGCTCACAAGGTATAAAAGTATAGGTGATTGTCGATGTA[C/A]TAAAATTCAATGTATATTTTACCCAATGTTACTCCTCTATTTAATATGAGACTTAAGCAT			C	A
1910	TM1910	A1	77488276	0.988	GCTGCTCCCTTAGGTTAGTTTTAGTATTGCTAGGCAAGCTACCTTGTGGTCTTTCTGAAA[C/T]TAATTTTACGATCTAACCTATTTGATATTCATGTCCTTGAATCGATGCTTGTTGGTTTTT			C	T
1911	TM1911	A1	77490846	1	CCATGATTGGTTGTTAACATCACAATGAGAATGTGCAAGCGTACATTATCGATGCAAGTA[C/T]AGTAGACAGATGTGAGTCTGTCGGATATTGATTCCACAGGGATGGTAGTTCTTTCTCAAT			C	T
1912	TM1912	A1	77494976	0.935	ATATCTTCTTCGAGAGTAAAAGCAACTGACCCTAGGTTGATTAATTGAAATTTCTTTCAA[A/G]TAAAACCCCTATTATCGCATTAACTCTATCTAGGGATTCCTCTATTAGATTTGACTCTAA			A	G
1913	TM1913	A1	77497632	0.965	TAGTAAATAGTCTGTCTGGCATAGTGTTATCCATCCAAATGATTATTTTGGTGTATACGT[A/G]TGGGCATTTAGTAACCGCCACTTGAGTTAGCAAAAATTTGATTTCATCATATTCTGCTAT			A	G
1914	TM1914	A1	77500559	1	GGTTCTAATTTGTGTTATGAGTCCGGTAATGCCTCTTAACCTATTCTGGCGACAGTTACG[G/A]GTTAGGGGTGTTACATTTTAAATGGTATCAGAGCTATGGTTTAGTCAGTTCTCGAACTAC			G	A
1915	TM1915	A1	77505398	1	GATTTTCGGGGACGAAAATCCCTAAGGGGGAGAATTGTAACAGTCTAGTTTAGACCCTAG[C/T]CAAAATAGTGGTTTCGGGACCACAAATCTGAGTCAAAAAAAGTTTAAATATTATTTTCCA			C	T
1916	TM1916	A1	77510253	1	ATGCATGCATATGTCATAAAAAAAATGCTCGAGTTTTTAGACACAGGCGACCACACGGGC[A/G]TGTCTAGGTCCTGTGAAGGACACAGGCTAGGGACACGGGCATGTGCTTGGCGTGTGAAAA			A	G
1917	TM1917	A1	77518064	0.935	AGACATTAATTTGTTAAAGATAGTTAAAATTGGGATGCCAACTGTGTGTGTTTTGTGTTA[G/C]AAGACATTAATTTTTGAAAGATAGTTATATGTGCCTTATGAAATTGCACATAAATGTAGA			G	C
1919	TM1919	A1	77527624	0.935	AACTGATGACAATGCCCCTACATCATTTCTAATTAGTAGAATGCCATCGACATATATAAC[G/A]AAAAAGATCATCTTTCCATCCCCAATGCATTTTTAAACACAAGGTTCATCTACGTTTTGC			G	A
1920	TM1920	A1	77538294	1	AGTAGAATGAAGGCATTGGAAAATGGATCAAACCGCATAAGAAACAGAGGAAACAGTAGG[T/C]CACATATAAGATTTAAACATACTATTTCCCTACTTCTTTCAAAACGGTATTCTAGATTTC	Gh_A01G1288	intron	T	C					A01	77535452	77539283	-	AT1G13450	Homeodomain-like superfamily protein	Q9FX53	TGT1_ARATH Trihelix transcription factor GT-1 OS=Arabidopsis thaliana GN=GT-1 PE=1 SV=1
1921	TM1921	A1	77546180	1	CAACTCTTTTGGGGAGACCCTGATTTATGACAGAGATAAACTCTCATTCGAAGATGTGAA[G/T]GGTCGTTTGTTGAATAGAAACAAACTCAACAATGAGTTTGGTTCGGATAGCAAGGTAGAT			G	T
1922	TM1922	A1	77553692	0.965	CTAATTTGGGCTGCCAACACCTCTATAAATAAGACATTAGGAGTTGAATGTAACAAAGTC[G/A]TCCTAGATGCCTTCAAAAACCCTCGTAGTTTAGATGTAGATGTAGTTTTTTTTTTTCAAT			G	A
1923	TM1923	A1	77557626	0.965	CACTATTGGGAATCTACTATACCTGCATACAAAGAAAACAAACTGTACGTTGAGCAAATA[C/T]GCTCGGTAGTATTTCCATGATTCAAGCCAAATAATGCAAGCTTATACATATGCACACATT			C	T
1924	TM1924	A1	77559805	1	TCTATATCTTTTCAGGAATAGAAATAAAAACACATAATTTAAAACTCCCTGAGTATCTTA[T/G]AGGGTTTCATCAACTTTCTGGTGTAGCCGATGTATTGTATTCTCTGAGCCAGTTGATGGC			T	G
1925	TM1925	A1	77565359	1	TTGGACCTCGAGTTGCAAAGTGATCCCGACTTCTCAAGTGATGGCTTCGTACTCAAATGG[C/A]AGGTGAAATTTGTAGGGTACCGAGCTCCATAACATCACCATAAACCCAAACACAACTTAA			C	A
1926	TM1926	A1	77573842	0.976	AGCCTCTTCGATAGCGGCTTTGATGAAGTGCAGGTGTTGAAGATGGGTCTCGTCCACAAC[G/T]TTACCAGTTGGACGTCCGACGGCTCGAACCTCTTCTCGTGCTTGCTTCATTAATTCAGGG	Gh_A01G1289	utr	G	T					A01	77569988	77572877	+	AT3G27320	alpha/beta-Hydrolases superfamily protein	Q9LK21	CXE11_ARATH Probable carboxylesterase 11 OS=Arabidopsis thaliana GN=CXE11 PE=2 SV=1
1928	TM1928	A1	77588337	0.935	TCAATCCAGAACATGTGGATCATCTAACCACTTTCATTACTGGACCTTATTGTTGTTAAA[C/T]CACTTGTAAGTTACATAAAGATGTATATATGAACTTCTATATATGATCAACTTTGCTGGG	Gh_A01G1290	utr	C	T					A01	77588688	77588930	+	AT1G29430	SAUR-like auxin-responsive protein family	0	0
1929	TM1929	A1	77598406	0.988	CGGTTTAGTCTCGAATCGATTTTAATGAATGTTTTGGGCTTCTAGACCCAAATAAGGGAC[A/G]ACATGCATGTGTTTGAAAGGTTTTGAATTAAAAGAGATTTTATTGCCTGGTTTTTGCATG			A	G
1930	TM1930	A1	77613445	1	GTCCCCCTTCTAAGTGCCTCATCAGGTGTTTAAATAGGCTTTAGAATGCCTAAGAGCCCC[C/A]AAAATTGACCTTTTTTTAATAGGGTTATACTTGGGCTCGGCAGGGACACGACAGTGTGAC			C	A
1931	TM1931	A1	77615695	0.949	TTGCACGGCCGTGTCAATCTTCGATCACTTCTCCTATGCCCGTGTATGCAGACACACGCC[C/T]GTGTTATTGTGACAGTGTCGACCACGGGGCTGGGCACAGACGTGTCGAACGCCTGTGCTA			C	T
1932	TM1932	A1	77620396	1	TTCCAGGGAATGCATATTCCAAGTGATTCGGCAATTGTTTAAGTTCCAGTTTGGGAGGTT[T/C]GTCAATAGAGGGTTTTTGCTTAAGTTCATCTTTTACCTTAATTCCCTCATATGCTGCTAG			T	C
1933	TM1933	A1	77632552	1	GATGTGATCTCTGACAATCTCCAGTCTGAGCTAGCTTGGTGACACTATAAAACATGGAAA[T/A]TAAAACGGAGTAAGCTATATAGCTTAGTAAGCACGTATGTAAGATAAGCAAACCATACTA			T	A
1934	TM1934	A1	77635624	0.935	ATCTTACCTCAGAACCTCAAACAATCATCAGGTCCAATATGATATTCTGAATCACTAATC[A/G]ATTCACATTGAACTTTTTTAGTTTACAATTCGTTATCACCTTTCTGAGCTTCACAAATTT			A	G
1935	TM1935	A1	77638945	0.935	TGTCAGGAGTCGTCACGCAATCACAAATTAAATATGACATTTATAGCTAGACTCTCATAC[A/G]TGCTACGTTAGCCCAAGAATCAACTAAACCATAGCTCTAATACCACTAAATGTAACACCA			A	G
1936	TM1936	A1	77642110	1	AAAGACATCTGTCCAGCAACTTGCCCATGCAATATGTAACACCCCGCACCCGAGACCGTT[T/G]CCGAAGTCGAACACGAGGTGCTAACAGACATAATTCATTTGTTTTCACAGTCTATTTTAA			T	G
1937	TM1937	A1	77651878	1	CCACTAATAGATAAGGTACTGCACTCTGAATACGTGATGTTAGAAGTCTCTCGTAGTTGA[C/T]GTTCCTCGAACACGAAAAAAGTCTACAAATTTGAACATGAAGACAATTCGAAGGCTAAGC			C	T
1938	TM1938	A1	77654177	1	CCGCTGCAAACTCTATCTCCTCATGCTTCAAATCTGCATATGACTTCTGACGATCGAAAG[C/T]GTAACAGCCCATTTTCAATGAAATCAGAACAGTGGTTTTGGGACCACAAATTTGAAGTCA			C	T
1939	TM1939	A1	77679350	1	TCTGGACTAGTAATGTTATTATTTAAATAGCCTCATTTTCTTGAACATATCCCTGGACAA[A/G]ACCCATCAATTCCTGAACCGTCCATTTAGTCCCCTCATGAACTAGTCAATTGCGCATATG			A	G
1940	TM1940	A1	77684946	1	CAAAATAATAATAAAATAATTTCTCCAACTTCAGATTTGTGGTCTTGAGACCACTATTCT[A/G]ACTAGGCCCTAAATCTGGCTGTTACATTTCTCCCCCTTAGGAATTTTCGTCCTCGAAAAT			A	G
1942	TM1942	A1	77698852	0.935	CTAATTACAATTAGGCAATTGAAAATTCATATTTTAGGTAAAATGACCATTTTACCCATA[G/A]ACTTTGGCAAAATGATCATTTTACCCCTATGCCCGAAAATCAAGTTTTATCAAATTTATT			G	A
1944	TM1944	A1	77712397	0.988	GGTAATCCAAATTAGACTCTGTAGGGAATTCTTTGTCATATAAAAGATTTAGCCTGGACC[G/A]GTAATCTGATAAAGCCCTTAGAGTACATGGTACAGCTAGAAATTTAGCCTGGACTAGTAA			G	A
1945	TM1945	A1	77716315	0.965	CACCTTCCTTATCTAGATTTTGAAAGATCAAATCGTTCGATTCACACAACCAACGACTCA[C/T]CGATCCATATCTCCTCTTCGCTACCGCATGAAGTGAGGTGTCCCACCCAAACACAATTTT			C	T
1946	TM1946	A1	77726971	1	TGGCAATGCCGTAAAGATGTCTAATTAGCACTCAAAGCATATCGGTCCTAGGCCCAGTTT[G/A]TAAAATTGAATGTTTGAAAACTCTAGACATAGAAGGATGTGCAACATGCTCATTAAATTA			G	A
1947	TM1947	A1	77729361	0.935	ATTTAAAATAAACTAAAAAGCATACTACACCCGAAAAAGGGGAAACAAAATAATGTTGCA[A/G]TGGAATCAGATCATGTTGCTAATAAAAATGCCACAGCAAAAGAATATTAGCAACCTGAAG			A	G
1948	TM1948	A1	77738079	1	AGCTTCAGAGCTCCAGCTACTTTTGTTGCTAGTGTTGGAAATGATTGATTTGAATGACCC[G/A]AGTGTAAACACTATGGTAAAAGACATCCTGAAAATTATAGACTGCATGATTGGGCATGTT			G	A
1949	TM1949	A1	77741848	1	GAGGAGGAATAGACCCTGTCTAAGAGTAAATTTTTCATAATTAAGCGGAGTTGGTTGCGC[T/A]CCTAGGGATAGGGTGACAATATTTTTTCGGATGAGGGTGAAACCTAATAAGAGGATCCAT			T	A
1950	TM1950	A1	77747370	0.996	CGACGGCTTCATACGCTGACATCTCTGAGCGCCTAACTCGATTCAAGCAGCAGTGTTTTC[T/A]GCGCTTCGATCACATTGATGCTACACTACACCAGATTTGTCAGCACTTCCACATCTCATC			T	A
1951	TM1951	A1	77749549	0.996	GGCTGTGTCCCTTTGACAAGGTCAAAGCACTATTTACACGAGTAGATCACACGCCCGTGC[C/T]CATTTAATAGCCTTGACCACGACCTTAAGCAATCGCACATGGGCGTGTCACACGGGCATG			C	T
1952	TM1952	A1	77753827	0.996	TGACCCAAGTCAGTAGTCTCCCTAATTTTCACATGGCCTGGCACACGGGCGTGTCTTGTG[T/G]CCATGTGGACAAGTTAGTATGTATGCCCTGTTTTGACACGGCCTAGACACACGAGCATGT			T	G
1953	TM1953	A1	77757196	0.996	CTTTGGGAAACTTAGAAAATTTTCTTGAATCCAGAGGTCACACACCCCGTGTACCCAGGC[T/C]GTGTGCCTTACATGGCCACCACACACGCCCGTGTGGAAACAGGACATACATACTGAATTG			T	C
1954	TM1954	A1	77764161	0.976	TCAACATCACAATTATTCATAGACATGTTCATACAACAACAATAAAATTAAAAGGAACAA[T/G]AATCAAACCTGGTGTTTCTCTGAGGCTTGACTAGTTTGCTCCGCTCCTCCTTCTCCGCTT			T	G
1955	TM1955	A1	77780566	1	ATGGATAGAAAATGGAGAGCTAGAGAGAGGGACGAAAAGGGGAAGAGTGTAATGAAAAAT[G/A]ATTCAATAGGTGAATTGTTTTTGTCTAGGTACAATGAATCAATTCATATGGCAAGTTTTG			G	A
1956	TM1956	A1	77788367	0.988	TTATTAATTTACTTTTTCCTTCTCTTGGCAGGTTTTTATAGTTTATGACTAGAAGAAACC[T/C]GTCAGGACCATTACTTTTTGACGAAGTAATCGATCGTACAGTTCACAAAACTCAAAGAGA			T	C
1957	TM1957	A1	77793014	0.976	TGTAGGTCTTTAAAGGTTACATTACACACGGCCATGCGGCACGGTTCCCTGTAGGTCTTT[A/C]AAGGTTACATTACGAGAGTTACACAGCCTAGCAAACGGGCGTGTGGCTTGGTCCTATGAC			A	C
1958	TM1958	A1	77797755	1	GTCTATTAACACCTCGTGTTCGACTCCGGTGACGGTCTCGGGTAAGGGACGTTACATCGA[T/G]AACGTCAAATAACCTAGGGTTATGGACGGCGGCCACTTAAAATCTATAAATAATTAATCT			T	G
1959	TM1959	A1	77801744	0.935	GAGATGAACAAGAAAGATTCGACCATAACAATTAAAGAGAAGAGTTGAGATTTGACTAGG[T/C]GATCATTACTTACACTATGCTGTTGAGATCGAGAAACTACGATTCAATAACAATTTAAGA			T	C
1960	TM1960	A1	77813386	1	TGAATAAGATAATATGATTTGGATGTCAAGCTGCTAACTTAAATCAAATTGAATTGAAAA[C/T]CGAGGCACAAATAGATTAACATACAAGGTAATGCCATCACAATTGCACTGCAAACAGATG			C	T
1961	TM1961	A1	77821951	1	ATACCAACTGCATGGAGATCAGCTTCAACAATTCAGTATATTGTTGGCCCTCGTCTATGC[A/G]CCGGAAAGATTAGAAGAAAAATCTGGCGACCTAATAATTGTGCCATCAACAAACCCCCCA			A	G
1962	TM1962	A1	77828442	0.976	TCAACATCATAAAATAACCATAAATAGTTGAACTAGTTGACGATCTTGAAGTTTTAGCAG[G/A]TCCAGCACCTGGGGAAGGGCTCGTAGGAATAAAAGTCGTAGAACCATTAGTCGCTGAAGC	Gh_A01G1291	intron	G	A					A01	77823062	77832788	-	AT3G48460	GDSL-like Lipase/Acylhydrolase superfamily protein	Q9STM6	GDL57_ARATH GDSL esterase/lipase At3g48460 OS=Arabidopsis thaliana GN=At3g48460 PE=2 SV=1
1963	TM1963	A1	77837925	0.976	ATTTATTTCTGTAACACCTCAAACGCTGCCTAGACGTTATGACCGAATCTGGCGAAGTCA[C/T]ATGAGAATGTATTTAAAACTGTGTTTACCCAAAAACCATTCCAGTTACCACCTTTTACTA			C	T
1964	TM1964	A1	77846792	1	ATACTTACCGAGCTGACGGAACCGCTAGCAGAATGCCAAAACTAATCGAAAGAAAGAAAA[C/T]GGAGGAAAGGGGTAAAAGGAATAAAAATTTCGACAGCAAAGGGTTTGGGAAAAAAAGAAG			C	T
1965	TM1965	A1	77856081	1	GGCTGATAAAGCAAGTGAGCTTGATAAATGTCTGGCTGAATTGCAAGAGAAGACTAGTGC[T/C]CTAGAGGCTGCTGAATCACACAACGATGAATTGGTGAAAAGTGAAAACTTGGTTGCATCA	Gh_A01G1292	exon3	T	C	GCT	GCC	A	A	A01	77854879	77859296	+	AT1G24460	0	0	0
1966	TM1966	A1	77862500	0.949	TCAAGTGCTTTCTTAATGCTGACTATGTATTTGAATAATTTGTAATGATCATACATATGT[T/C]TTTAATTGGTGGAGGGTATCCGGTGGTCAGGTTCTAAGCAGTCGTCCCAGAGCAAGGCTA			T	C
1968	TM1968	A1	77880809	0.988	TACATTTACTCTTCAAACTATTCCCTTATTTTCCTTGATTGGCTCTGGTTCAATACAGTC[A/G]TATGTTTTAAGTGAACTAGCTAGTAAGTTTGGAATAGCAGTAGAGACCATAGAAAAGGGT			A	G
1969	TM1969	A1	77889918	1	CTAGGCCGTGTAACTGCCTGACTTGTAACCCTTAGTAAGCTATAGTGGACACACGGTCGT[G/A]TCGCCTGGTTGTGTGTCACACACACCCGTGTCTCTGGCTGTGTGGACGAAAAATAGGTCA			G	A
1970	TM1970	A1	77899482	1	TTCTTTGCCTTGGTTCTGGTTTAGGTTCCACTAACCTTTCCTTGTCTTGGATGGTAATTG[C/T]GTTGAATTGTTCCCTTGGGTTAGATTCAGTGTTACTCGGCAGGCTACCTTGTGGTCATTC			C	T
1972	TM1972	A1	77913898	1	TGTCCCTGTGTCCACACGGGCGTGTGGCTCCGCTTCATGGAAAAAATTTCATAAATTTTC[T/C]CGAACCTTCCAAAGTTAGTCCTAATCACTTTCATAGCACGTTGAAGGCCTCGTAGGCCCA			T	C
1973	TM1973	A1	77916704	0.965	AAGGCCTAAGATGATCTTTCAGAAATATGCACATGTGTTAGGCACTTAGGGTGCTAATAT[G/A]TGTGTTTAGACCATAATGGTCTAAACAATTTCTGAATTCAGTAACTTTGTTTATGTTTTT			G	A
1974	TM1974	A1	77921802	0.935	AAGCCTAGGTTTAGGTTCTTCTTTTCCTAAACAGCTGATCTACTAAGAAACTCCTACAAA[A/G]CAGTTAATTAACCATACATCTACTCGCTAATCCCCCATAAAAATATTAGTTCCTCATGGA			A	G
1975	TM1975	A1	77927521	0.976	AATCCCTAATTCCCAAACTCGCACGTCTGTGTGGACCAAGGGAGACGGCCGTGTGATTTT[T/C]GAAAAAAATCCCCAAAACAGCCACATGACCGTGTGGCACCAACATTGGCCGAAACCCTAA			T	C
1976	TM1976	A1	77930085	0.965	CTCATTATAACATATAAAATTCCTAATCAAGCACGCATATAACCATGATCGCATGCCATA[T/C]TTATCCTAACATTTTACTAAGTTCACACAAGTATCATTTTCGTATACATATGTCATTACC			T	C
1977	TM1977	A1	77936821	0.935	TGTTTACCTCATCTTGAAAATGAACACACATTTCTTCTTTGGTCGGTACAATTTCATGAC[G/T]GTATTTAGTAAGGTGTACAAACTCTCGCTCGTATTTTGCTATAGATTTATTTTCTTACTT			G	T
1978	TM1978	A1	77940800	0.976	GTGTAACTCTCTGTTTATGACGTCAGCAACAAAATAGGGCCATACGGCCAAGTCACACGC[C/T]CGTGTGCTAGACCGTGTCCTCCACACGGATTAGACACATGGCTGTGTCTCTACCCGTATG			C	T
1979	TM1979	A1	77964124	0.996	CGAGCGGCTGATCAAATTAACACTGTCTGTCTGATTATATAGATATAATCATCCCCTTCA[A/G]AGCTGCTCGATATTCCTCCAAGTCAAGGGGAAACTGCACTGTGTAATCTGATGTTTGCCA	Gh_A01G1294	utr	A	G					A01	77964505	77965110	-	AT1G67740	photosystem II BY	P80470	PSBY_SPIOL Photosystem II core complex proteins psbY, chloroplastic OS=Spinacia oleracea GN=PSBY PE=1 SV=2
1980	TM1980	A1	77966584	1	TTGGCACATTCCTCGAGTCGTCCCTCCTAGCATACTCACTCTTACAGTATACCTAAAACA[C/T]AAACATAACACTTGTAAGTTACACGAACTTGTGAGCATAAATACATAATACATTTGTGGA			C	T
1981	TM1981	A1	77980428	0.965	TTTCTAGAACTCAAATAAGGGAACAAGACTGTAACAGAATACGAATGAGAGTTCATGTAG[C/T]TAAGTCAGTACGCAACTGAATGGGTCCAAACTGAGTAAAAAATGTGTAAACGCTTCAAGG			C	T
1982	TM1982	A1	77987885	1	TTACAATTTCCAGTAAGAGTTTACTGGCCAGTGGAACAAAGGGTTGTTCCGATATGAAAC[C/T]TTAAGGATTAAAATCCTAAAAACACGATTCTGCTGATAAAAGTTATCAAATCGCGAGGTT			C	T
1983	TM1983	A1	77994170	1	TTCGATAGTGCTTCAGGATTCCCATTGCCTAGGCGTCGCAGTCTACTCAGATTGAAGTTT[T/C]GGTAATTTCAAAACCTTTTATCACCCCGATACGTTCCTTACACATGGATCCATGGTTTGG			T	C
1984	TM1984	A1	77998893	0.976	GGGCCTGATCACATTCATATGGCCCATCAGGCCCAATCACTTTCATATGGACCGTCAGGC[T/C]CAATCACTTTCATAGTCATGCAATCATATGATTTTTCATCACATAGTATCAATTTGCCAA			T	C
1985	TM1985	A1	78008079	0.976	GGTGGTTCGAGGTGTTTATACTCCTCATTCCTGCTATCAAACTTAAAATAAGGTTTTAAA[T/C]GGGTGTTGTTTACCTTAAAAGTGCCGAACTTGGGATGACTCACCTCCACCGTACCGAATG			T	C
1986	TM1986	A1	78026408	0.996	TACCTTAGTGAGGAGGTCATCAGGGTGAAGATAGAAGATTTGCCACCTGTGTTTCTCCAC[A/G]ACAAATGAGATGGTTTAGAATAGCCTATAAAAAGGGCATCTTGGAAAAGGAAACACTTTT			A	G
1987	TM1987	A1	78029824	1	CACCCCAAACGGGTCTGGACTGTGAGGTCAAAAGATAATTAGTCCTTGTCAACTCGTTAT[T/C]TGAGTGGAAAAACAAAAATCCTACTAGATAGCAACTAGTTAATTAACGAGGAACCCAAAG			T	C
1988	TM1988	A1	78034393	0.996	CCGTGTGAATAGGCCGTGTGCTTCATACGATATTAAACACGCCTCTGTTTGTAAGCCGTG[A/G]CAAAACAGGGCATACATACTGACTTTTCCACATGGCCACAAGACACGCCTATATGCCAAG			A	G
1989	TM1989	A1	78039780	1	TAATGGCATGTATAGGTTATTTAGCCAATAATGGCATGTAAATGTGTAACACCCCTTACC[C/A]ATATCCGTCATAGGGACAGGGTCCGAGGCATTACCAAACTCAAACATAAACATTCATACA			C	A
1990	TM1990	A1	78048904	1	GACAAACATACAAACATTAAACTAAAATACGGGCCATAAAGTTTCATTCATATTTCAAAA[T/C]GTTCATTCACTTACACGTAGTCCCTTATTTGAGTCTACGAAGCCCAAAACATACTTTAGA			T	C
1991	TM1991	A1	78054218	0.935	GGGACTAAAATGTGAAATAAATTGAATATGTGGACTTGTTTGAGAGTGGGTAAAATTCGG[T/C]CCAACATAAGTATAGGGAAATTTTGTGTATTTTGTGTTTTGTGCAATAAGGACTAAATTG			T	C
1992	TM1992	A1	78063098	0.965	TGCATTGCCATTAATCATTGTGGTCATAAGAGTATACAAGTTTAATCACATACCTTTTTA[C/T]TTCCATGCATACATATATACTTTACCTAGCTCACATTCGAACTACATGTGTATTACCCGT			C	T
1993	TM1993	A1	78068510	0.988	GTCTGATTCATAAAACATCTGTAATAAACATTGGAATATTGAATCAATGCATAAAAATTC[A/G]TAATCAAGATAATACGATATGAGTACAAAATCTGTTCGTGGAAGAGGCCGTGGACGGAGC			A	G
1994	TM1994	A1	78072875	0.949	GAGGCAGAACCGTGAGAAAGATCGGAACCATTTCCGGAGGGATTCTGAACCTTCGGATGG[A/G]GCAAACAAGAATGCCAAAAGGGCGAGAGTGGAGGAGCCAGTTCGAGCCGTTCCGATGAAT			A	G
1996	TM1996	A1	78091338	1	GTGTAGTTTGATCAATCTAATATGGATGGTTGCAATATAGAGCTTTCTTAATTTGTAATA[T/C]CCATGCCTATCAACCAAACACAAGACCACACCAAGTATATTCTGTGATAAGCTCTAAAAC			T	C
1997	TM1997	A1	78098777	0.949	GAGTAGACAACGACGCCTAGGCAACGGGAGTCCTGAACCACTAACGAACCAAACCGCAAC[A/C]TTTCCGATGTCGGCCTCTACGTAGTCCACCCAGTTGACAATGAACGGTAGAAAAATCTCA			A	C
1998	TM1998	A1	78107178	1	TGATATCGACACGGGTTAGCACATGGGCATATGGCCAGCCCATGTGGGAATGCCAAGGTC[A/G]TGCGATTCCTGAAAATAGCTTGTTTTGTCTGATTTTGGCCCGTTTTCCGCTCCTTTTGTT			A	G
1999	TM1999	A1	78136801	0.976	GCTAGAGAAGCTTACCTCCACATGATGGATGCCTGGTACTCGGAGTTTGTTCGTGCGAAT[C/T]CGAACACTCAACCTCCCCCACCTCCTCTAATTCGTCAGTATGCCCCTATAGCTCCGCAAG			C	T
2000	TM2000	A1	78143103	0.996	TTGGCCGTGTGAAACACACAGCCTGACCCATTAATCTCCACACGTTTGTGTGGTTTACCC[T/C]TGTGGGGCCCACGAATTCGTAGGGCCTACACGGCTTATTTTGGCCCAACATGGCCCAAAA			T	C
2001	TM2001	A1	78151806	1	ATCCCTACACACCATGTGGGGTTTAAAACACCCACCTAGCCCTACACACCAAGTTATACC[A/G]AAAGCGGCACATATCAGTAATATTGCATCTGAGCTGCCAGATAATAGGCATGAAAGCCTT			A	G
2002	TM2002	A1	78162206	1	CACACACGGCCTACCACACGGGCTACCACACACCCGTGTAGCATCTACAGTTTACAATTT[C/T]GACTTTCGCCAAATCCCATTTTCTGCGTTTTTGGGTACACACTTGGTATCGTTTCTATGC			C	T
2003	TM2003	A1	78168858	0.935	AGTGATGAATGCACATAGAACAACTCATAGAGGTTAACTAATTAAATGGGCTTATTTGAC[T/C]CACTTGGACTAGCACAATTTGTGAAATATATGAAGAAACATATATAAGTCTTGGTTGCTC			T	C
2004	TM2004	A1	78189895	1	CCCACAGGTTTAGGCGAGTCGGCGAGGTAGAAGCTCAGTCATCTTTATTTTAGTTATCTA[T/C]TGTGTAATCTAAACTTATATTATCGTGTGTTTTTATTTTGGATGACTGGTTATAAGTTTG			T	C
2005	TM2005	A1	78200210	1	CAAGTACCTTAAAAGGCTAGAAGCGATTCTTCTAGTAAACTTAATGAGCAATTTCCTCTC[G/A]AGGTGTCTGCTTTATAACTTTGTAAGCCTAAAAAGGCGATGTTGAGCCTGAAAAGGCAAT			G	A
2006	TM2006	A1	78203821	1	CCTGAGACCGTGTGGACAAATGTAACACCCTGATTTTGGGCCTAGTCGGAACAATAATTT[T/C]GGGACCACAAATTTGATGACGAAAATTTTATTTTTATTATATTTTTATGGTCTACGATTT			T	C
2007	TM2007	A1	78208449	0.935	TATATCCGAATCTGTCCGAACAGTTAATAAGGTTTCCATTACTTATTTCATTCTCAATCC[A/G]TGTACCAATTCACAATAATTACATCATTAACTCATTTATACAATCATATAATAACATAAA			A	G
2008	TM2008	A1	78215194	0.988	GGTGCTGGTCCTATACATTCTACTAGTGGCTGAGTTTTAAGGCATATGTTGCAGTTACTC[G/A]TCAGCTTGTGTGAGCAGCACCGTGTAGCTACGTCTTGACCGTCAGATTGTGTGAGCAAAC			G	A
2009	TM2009	A1	78221732	0.935	CTCAAAAAATCCCTTGGACTACCCAATATCGAATCTCTATCATCAGCCATTAAATTGACT[C/T]GATTTTCTGATATGTACTCCTTTTCATGAATACCTCCTTCCTAACTGTTAGGATTGACAA			C	T
2010	TM2010	A1	78230700	1	TTCCGTTCTAAGTCCAAAATATCGATTTTTTAACATTTTAAAGGGAGTTTCTTTGCTGAA[A/T]TTTTCTAGCTTCTAAACCCTTTCTTTGCTGCCATCTTCGGTGGAGAGATGATGAAGAAAA			A	T
2011	TM2011	A1	78242479	0.976	CCTGCACTTAAAATTTTGGCTTAAAGTTGTACACGGGTAGGCCACACGGGCATGCGCCAT[G/A]ACCATGTTGAAATGACAGTTTCGTCCACGGGCAGGCAGCACAGGCGTGTTCCATGGCCTT			G	A
2012	TM2012	A1	78247883	0.988	TCAGGGGTTAAATTGAAAAAAGCCATAAGTTGATGACATCTATTAAAAAATTAGGAAAAT[T/C]TAGTGATGGAATTGAACATGGTTAAGACCTAGTTCTCATTCGGTTGGATTAAAACCAATT			T	C
2013	TM2013	A1	78250133	0.976	AACACAACGAAAGGGTTATTAGAGTGGTGGGCAGGATGGCTACCCTACAAGTCTTGGGTT[A/G]AAAAGAGAATTTATAATGGCAACTGACCACCCGATTATGTGACTAAGGATTTAAAATTAT			A	G
2014	TM2014	A1	78252774	0.996	GTGCTTCCAGCAGTGAGGGGTGTAGGTTATTCTGTAACACCCCGTACCCGAGACCGTTGC[T/C]GGAGTCGGACACGAGGGGTTCACAGATTACATTCACTTACTTGCACAGTTCATTTTAAAA			T	C
2016	TM2016	A1	78265144	0.915	CCACGGCCGTGTGACGTGGTTGCCAGGCCGTGTTCGATCCGTTAAATTGTACACGGCTGT[A/G]TGGGTTAATGGTCAGGCCGTGTGAATCGTGAAAGCCTTGGTCGACACCCTCGAAAGACAC			A	G
2017	TM2017	A1	78269777	1	TGAATTACATGTAAGACCATGTCTGGGACATCGACATCGTATTTGATTTTGTGTAAAACC[C/A]TGTCTAGGATCGTGGCATCAATATTTGATTACATGTAAGACCACGTCTGGGACGTTGGCA			C	A
2018	TM2018	A1	78277647	0.996	GCATCTAGAAAATACTCCCACAATGGTCTACCACCAGCGATAGGCCTCATAATGTAGCAG[A/T]GACATAGTTCTTTTAAGATTTTTCCCTTGAGTGCACTCTATATCATCTAAAATCCTCTTT			A	T
2019	TM2019	A1	78280128	1	TTACTTGTGTAGTTTACTCGATTAACACGACGAAGTCGGTGATTCGACTTGGTGAAGGAA[C/T]AGAGAAGTTTAATGATCTACAAGAATCATTTGATCGGTAAGACTAAAATACAAAGTAAGG			C	T
2020	TM2020	A1	78297459	0.965	TTAAGTCCAGTGTCTATGAGACTCTACAAGAAAAGCTATCTTCGTCAACAATCACATACA[C/T]GAATGATAAAGAACCGCTAGAAGAGTCAATATTTAAGTTCAGTGTCCATGAACCTTTACA	Gh_A01G1300	intron	C	T					A01	78291501	78299186	-	AT1G13180	Actin-like ATPase superfamily protein	Q9SAF1	ARP3_ARATH Actin-related protein 3 OS=Arabidopsis thaliana GN=ARP3 PE=1 SV=1
2021	TM2021	A1	78305648	1	ACGTCATAGTCAGAGAGTTACATGGCCTGAGGACACGGGCGTGTAATAGCCCAAATTTCA[A/G]CGATGTCAAAAATAGTGGTTCGAGACCACCAAATTCGAAAAATGAACTCGTAGATTATAT			A	G
2022	TM2022	A1	78308761	0.935	AATTTACTTGTAATGAGTTATCCTTATTGAACTGCTGGTTCAAATTACTCTCCCTTTAAC[A/T]ATTTACAAGGTATTATTTCTCTCCCCCCTAATGTCGAGAAAACTATTTGAATCAAAGTTG			A	T
2023	TM2023	A1	78314146	0.988	AGGATTAATCTCCTTAAAATCAACCTATAAATCTTCCAAGATAAGTGCAAATGATATGTG[G/A]TCACCGCCAAACGTGTGAACGTTTGACTGGAAAATATTACACCAAATATATATGAAATTA			G	A
2024	TM2024	A1	78319896	1	TATGAGCGCAGTGTTCGATTTGAGGATGGTCTCCATTATAAGCTTAGGATATTGATAGCT[C/T]TACAGAGGGAGCGTGATTTTATTGCATTGGTGGAGAAGGCTAAAATAGTCGAGGAGGTAA			C	T
2025	TM2025	A1	78330360	1	CAAAATACCTATACATGCCATTATATCCAAAATCAAAACATTCGAAAATACCAATAAAAC[T/C]GATGGATAGTGTGATATATCTCCGACAAGCTTCCAACCCAATCGAGCTTCAATAATCTGA			T	C
2026	TM2026	A1	78334074	1	CACCGACTTCCGTTTGCAAAGCTGCTTCTTCTAGATTGAGACCCGTATTTGAGGGTCGTA[A/G]TGGAGAGGCTAAGGAACCTTCTTCCATATGATGAATGAGTGGTCCACCGAGTTCGTACGG			A	G
2027	TM2027	A1	78337019	0.965	ATCTGGCACATAGTGTGCAAAAATCCTGAGTATCCAACATTATTATTTCGAGTGGTTCAC[A/G]GGTATGTTAAAAGATGAGAATATGTGTAAGTTCATTCCGAAATGGTTCAAGTATGTACGT			A	G
2028	TM2028	A1	78344568	1	GCTGATGCTTTAAGTAGGAAATCTTTGTTTTCCTTGAGAGCAATGGATACGCTTTATCCA[G/A]TGATGGCTCGATTATAGCTGAGATGAAAGCTAGGCCGGTATTTCTCTAGCAAATTTGTGA			G	A
2029	TM2029	A1	78348511	1	ATGACAAGTTGATAGCTATAACATTAATGTGGTAAAGATGAAGGTAAAATCTATGATATT[G/A]GTTGCATGTGAAATTGCCATGGTCATGACATGTTAGGAATGTTTAAGTGCCAAATTTTAC			G	A
2030	TM2030	A1	78352421	0.965	AGTACACAGGCAGAGACACGGGCGTGTGTCTCAGTCGTGTGGATGACAAGGCCTTAGGCA[T/C]GGGCGTGTGTCTTGGACATGTGAATTTTGCACCTATTTTATGAAAATTAAATTACCCACA			T	C
2031	TM2031	A1	78360974	1	TATATTATTAATGTAGTTGTACTATTTACATACAACTTACCTCGGATTACAAATTGTGAC[G/A]ATTAGTCAATTTAGTCGATTTGCTTGGCTTTCCCCCGGTCTAGGTTCGGATTCGGTATTT			G	A
2032	TM2032	A1	78365071	1	AGATCATTTTGGTACTCAGTTTAGTCACGAACCACTTTTAATGCCTATTTGAGGCACCAA[G/T]GACTCGTATTAGGGATTATATGATTGAATTTGAATGGCTTTTGTTTACAATGAGAAATGA			G	T
2033	TM2033	A1	78378719	1	ATATCAAAGCTGTAGATAGTGTGGTGAACTTTGCTAATGATCCCCAAGCTCGTAACTTTA[T/A]TCCAAAATCTATAAAACAGAGTAAACAAAAACACACATATACTTTCATAGAACAATTTCT			T	A
2034	TM2034	A1	78385114	0.935	ATCCCTCAACATCCACTTTAAATTCTGAATCAACGTTCGAATTACATTGAGCCTGCTTTA[T/C]TATAAAATAATTATTGACTTTCTGAGCTTCGCAAATCTGCTGAATAAATAACGGTCTTGC			T	C
2035	TM2035	A1	78387594	1	CGGGAATCTCTAGCTTTAAAATTAGCTTTTCTTTTCTCTTTTTCGAGCTCTTCGGCTTTG[T/C]AAGCTCGCTCAACAAGTACCACGAACTCTTTAATTTCAAGTATACCAACCAGCAATTTAA			T	C
2036	TM2036	A1	78393782	1	CCCGCATAACTACTGCCAATGGGGCTCTATTTATGCTCTATCCTTTGACAACATAACCTT[T/C]GTAAACTAAAAGCCGTAATTACACTTCAACCCCAAACTGTACAATCACCATCAACTAGGA			T	C
2037	TM2037	A1	78397744	0.935	AACATATATATGTCTAAAACATACTCAATCCGATCCAAGCTTCATTTTCACACATAGAAT[A/G]ATCAAAGTTACAATTAAATCTTAACAACATAAAGCCATATACCTACAAACAAACTCCTCT			A	G
2038	TM2038	A1	78402098	0.949	CCAGTCATCCGTCTCGGACCATGTAACATCAGGCAACGGCTGATCTTGGAGCTCCTTGTA[T/C]TCATGAACTCATGGTTTGTCATATCTGCAAATTTGTTTAGGTTCGAACTTGTAAGGCTTT			T	C
2039	TM2039	A1	78404933	0.996	TCGAGAACCTTCTCGTCTTGGTGGAGAGCGATCCAAACGTGGACTTTTTCCATAGATTGC[C/T]AGAAAACGATGGCGCCTAATAGGTGGCTACTCTCACCATTTCTGTCTTCTCAGCTTCACC			C	T
2040	TM2040	A1	78408385	1	GCCGTGTGGTGAATTTAATTCCACATTTAAGGTGCAGACTTCATACAGCCTAGGCACATG[C/A]CCATGCCCAGAAGCCGTGTCCTCCACACAGCTAAGACACACAGCTGTGTCTCTACCCGTG			C	A
2042	TM2042	A1	78438648	0.988	ACAACCTCTACCCCCAACTAATCCATCTCTGATACCTACTATACCTCAAGTAATTTATCT[G/A]TTGAGATTACATAAGCCCCCTATTGATAAAATAAAAAAACACGGGGCTGAAGAATTTAGA			G	A
2043	TM2043	A1	78442994	0.935	CATATTTAGGGCACTTAACATTTTAGCCGTACAATTTCAGACTTTGACAATTTAGTCCAT[C/T]TTTCACAAAATCACCAATATGTAAAATTTCTTTGCAACAAAGGCTAGCTGAATTTTCATG			C	T
2044	TM2044	A1	78445268	1	GCTAACAATTCCTTGTCAGACTTCTGAGCCTCGCAGATCTGTTGTATAAACAAGGGTTTT[C/G]CTTTCAGTTCGGCACAAACCAGAGTATTATCAGACAGTGTTAAATAAGCATTCATAGCAC			C	G
2045	TM2045	A1	78447929	0.949	TCTCCCATCTTGGTCTAACCCCCTCGGGTGCTCTTTCACGTTGGCCATTCGTTTCAACTT[G/T]GAACAAACGGTCTTCGATGGGATTCAGCCTTCGATCTAGGAGTCGCTCCATTTCTCGTAA			G	T
2046	TM2046	A1	78453284	1	GGGTATATGCATGTCTAGGATTGGATCTAGGGAGAGCTTGGTACTTAAGCGGTCTTAATG[G/A]CCCACCTCTTCTCCTCTGGAATTCTACCTGGTGCATAGTATTCGTTCATCTTAGCTCGCG			G	A
2048	TM2048	A1	78464356	1	TGTGACGTATAGGGAACTCTATCAAAATCCATATCATGCGCATGCTATAGCCCCTTTCCA[T/A]TTAAAACCATTACAACCTCCGTACCTAAATGGTATGTAACACCCCAATCCCGTATCCATC			T	A
2049	TM2049	A1	78467520	0.915	ACACATGCATATATACTTATAATAAGCATCAAATATGACGGTTAATTATTTTCATGACTC[G/A]GTTTTGTGGTCCCGAAACCACTTCCCGACTAGGGTCACATTAGGGGTGTCACAACTCTTC			G	A
2050	TM2050	A1	78483434	0.988	GCCATGATCAGTGCACGTGTCTACACCAGCATGGTCACTGCCAGATCCCTCATTCGATTG[C/T]CTGCAAGAAAAGGAAACAAACAGCAGATACGTGAAAAAGCAGAGTAGAAAATGGCAAGGA			C	T
2051	TM2051	A1	78488387	0.935	ACTTAAATATGGAGTCAATCCAAAAGATGTACCATGATTGAAAACTCCTTATTGTATACT[C/T]TTTACAAAAGCAATTCATCCAACTACTTTGTCTAATGAACTCATCATGTGTGTGTTACCC			C	T
2052	TM2052	A1	78493567	1	TAGAGTCGGATATAATTGGTGTAACACCCCCATACTTAACCCAAACATTGGGTCAAAGTA[A/C]AGGGATGTTACGTTTGTTTCTAGAGCAACTTTGGCGATTTCACGTCAATTAATCATTATA			A	C
2053	TM2053	A1	78495714	0.935	ATGATTAAATGAGTCAATTTCATCATGTTAGATCAAGAAAATCGAGATTTGAGATTAAAT[C/T]GAAAAGTACGATGTTATGGACTAAAATGGAGTAATTAGCCGAAATTGCATTCGAGGTAAG			C	T
2054	TM2054	A1	78502970	0.996	CCCCTTAAAGAAATTTCGTCCTCGAAATTTCCCACTCTCAGACTACACCACCACACCTCC[G/A]CTGTGCACTCTGATACTAATAATACTAACATACACCCAAAACATTTATCTATCGGAGTGG			G	A
2055	TM2055	A1	78505103	1	CACGGATACTTTGGTAATTTTACAAATTGAGGGCATTTTAGTAATTTGGTAAACTAAAGT[G/A]TTCTAAACTAGGATAATAATACGAATGGGCTTAAAGCCTATTCTCGGCCCAAATGGGCCC			G	A
2056	TM2056	A1	78508852	1	GAGCACGCCATAAAGCGAAAGGGATCAACCAAGAAAGGTACCACTACTCTCCTCATGGTT[C/T]TCTCTATTTAAAGCCAGCTTCGCATCCCTTCTTATGTTAGCTTCCCGATGTGGGATCCCT			C	T
2057	TM2057	A1	78520012	0.965	AGCTGATTAAATTAACCATTCCAAAAACATGAATACTCATAGATATGTTCATCATAACAA[T/C]AACAAAAATTAAAGAGATAGGGAACAAGAATCAAATCCGGTGGTTTTCCGAGGCTTGACT			T	C
2058	TM2058	A1	78522877	1	CTTCCTCTTCATCGGGATCCTCACTTTCTTCAACTCGCTGCTGTAGAACAAAATCTCCAA[T/C]TACTCGATAGAGGTCCCAATCTATGATTGTGCCCTGGCTATACCCTGTCTTCTTTACGTT			T	C
2059	TM2059	A1	78527835	1	TAATTTAGGTGACTCCTTGATTGACGCTTTTGGTTGGGCATAATCCCTTTCCTCTAACTC[C/T]AAAGATTCAAAGCGGGATTGTGGAATAAATCCCCTTTAATTAACTTCTAACAAAGCTAAG			C	T
2060	TM2060	A1	78535308	0.965	TCGAAGAAATCATTGCTGGTAAACCATACAAATCACTAGATTCGATCCGAATAACTTCAT[C/T]ATTCTGGCTCCGTAGATAATTGTCTTTCTTTTACAGTTCACAATAGCATCATGTAAAGTC			C	T
2061	TM2061	A1	78538001	1	ACTGAATAGGAACATGGCAATATCCATATTTCAACACACCTAATACCTAACACAAGTTCG[T/G]GCAGACATGTCACATAATTATAAGGTAGAGTGGGCAAAGATCGAGCTTAACACAGATAAT			T	G
2062	TM2062	A1	78540760	1	GGTGGTTTCGCCATGATGGCTTATAAAAATTGGATTGTAGTCCTTGCGTTCCTCGGTTTT[G/T]TTTCATGTTACCTATGTAGTACATGGATTCTAGGTTTGATGGACATTCTTCGAGCAAATG			G	T
2063	TM2063	A1	78545212	0.996	TCAGTTGCTAGTCAATAGGCTTAAGTTTAAATGTTGGTAAAATTCTAGCAGAATAGGCCT[G/A]CTGGTCTAGTGGTTATGTGGGGTGTTAATATGTTGGAGGTCCTGTGTTCGAATCAAGGTG			G	A
2064	TM2064	A1	78548109	0.965	TTTCTCTGTTACGTGACGAGGTATACTAGTGGTGGCTCACGGTTAAGGAGGGCACTCAGC[T/C]TGACCAATTGACTTGGGATTATTTTAAAACTACGTTCCAGGGTAAGTATGTGGGGGCCAA			T	C
2065	TM2065	A1	78560693	1	TCCTTGAAGACTCAATGCATTCTTTTGCAATCCGATCTCAGCTTCTCTCCAGCTCCCCAT[G/A]CGCCATTCAACTCAAATCAGCTCACTTGAGCTCGTTTTAGCTCGTTTGAGCTTAATTTTA			G	A
2066	TM2066	A1	78562857	1	CAAGGGTAAGGGCTAGCAACAGTGGTTGCAATAGGCCTCGAGTGGAGGAAGGGTCTCATA[G/A]TACCAAAGATAATAGCAATGGGAGGTTGATTGGCAGCTTGCGAACATTTTGAGTAAAAAT			G	A
2067	TM2067	A1	78567652	0.976	ACACGGGCATGTGTGCCCTGTAACTTAGAATTTTTTTTTGAAATTTCGTGAAAATTTCTT[A/G]GAGTCTCCGATTAAGTCTCGACTGGATTCTAATGCTCGTATTGGGCCTCGAGGGTCCATT			A	G
2068	TM2068	A1	78576925	0.965	TATTCACATGCTCGATTAAGTTACACGAACTTACCTCGACACTTGTTCGCATAAATAATC[T/A]ACTAATCCGAAACCATTTCTTTTCCTTGATCTAACCTTGAATTTGTGTTACCTGGATCTA			T	A
2069	TM2069	A1	78588527	1	GCCCTCAATGTACAAAGATAGATATTAGAATATAAAAATAAGATAGAGAGAAAAGTGAAA[C/A]TTCCTGTATGATGAATACCTCGAACTGGAGTTTTCGAGAGTAATCGGTACGAGAGTGGAG			C	A
2070	TM2070	A1	78595238	0.965	TCTTTTTATTATCTAGCCTAGGAATAAAAAGGTTTTGTTTTAGCTAACTAATTATCTAAA[C/A]TAAGAACTCACAGAGAATACAATTGGGGAATTGCTTTTGGGAAAATCGATTGAATTAAGA			C	A
2071	TM2071	A1	78598883	0.988	CTAAGTTTGTGGCAAATCATTTGACTTGTCAGTAAGCGAAAGTTGAGTATCAATTCCCTT[T/C]AGGATTGTTGTAACTGATTAAGATTCTGCAATGAAAGTGGGAGCATGTTACTGTAGACTT			T	C
2072	TM2072	A1	78606385	1	ACAGCACTTAAGATTCAACAAGCATCGATCCAAAGGCTCAAAACTCAGATAGGTCATCTC[G/A]CTAAATTGATATCTAAACGACCACAAGGTAGCCTGCTGAGTAACACTGAATTTAACCCAA			G	A
2073	TM2073	A1	78609578	0.9	TGGAACTCTGCTTAACCTTCCATCTTCAAGTCGTCATGAAAAACTTCGACGATCTTGGAA[C/T]GGTCCAGTTCCGCCTTGGTGGTCTAGTGCGCTAGTTGAGCGTATCGGAGTTAGGAGTTAC			C	T
2074	TM2074	A1	78615181	0.976	AAAATTTCAAAAAAATTTTCAATGTGCAGGGGACACACCCCATGGGGTCAAGCCATGTGG[C/T]TCACACAGCCAAGAGACACGCCCGTGTCTCAGGATGTGTGTGGCAGTCAAAATAGGGCAC			C	T
2075	TM2075	A1	78618728	1	TATTTATATGGGAAAACGCCGCTATAGAACATGATCTTTAGCGGTGCTTTTATTACAATC[A/G]CCGCTAAAGAACATGATTTTTAGTGGCATTTTTTTTACAAACGCTGTAAGAGAGTCAAGC			A	G
2076	TM2076	A1	78624930	1	TCATAATAATCATAAAATAAATATTTTGATATCAGAGTTGTGGTCCTGACACCACTATTC[T/C]GACTAGGCCCTATTTTAGGATGTTACATTTCTCCCCCTTAGGGACTTTCGTCCTTGAAAG			T	C
2077	TM2077	A1	78629314	1	TAGTACCCTCGTAGTATTTTCGAGCCAGAACTCGGCTCTTTCAGCGTCGTCATCAACTTT[T/C]TCTCTAATTTCCTCAGCCCCATACTTCCTAAGCTTATCTACAGGGGCTTTACCGATACTC			T	C
2078	TM2078	A1	78644223	0.988	CGAAGTAAACCTCGGATTCATGTCTGACACAATCGCCATGTAACGCCCCCACGCCCGAAA[T/C]CATTTCCGGAGTCGAGCTTGAGGAGTTACCGAACATAATTTATCAAATTAAGAACTTCAA			T	C
2079	TM2079	A1	78656044	1	TTTCTGTCCATCCAAACTTGACATCCTTTTGCAGTAGCCTAGTCATCGGGGTAGCTATCT[A/G]TGACAACCCTAATTTGACCCTAGTTGGAATGTGATTTTGGGACCACAAAACCGAGTCATA			A	G
2080	TM2080	A1	78660050	1	GTCTATTAACAGAGCCTGCTATAGATGCGGTTCGCGAGATCATTTCGTTCGAGATTGTAC[G/A]GAACCTGATGAGAAAAATAAGGTGCAAAGTGCGAGATCGAGTGGTACAACGACAAGAGGT			G	A
2081	TM2081	A1	78662256	0.935	TAAATTTGCTTCTAATGTGGAATCAGAGTTTCAAATAGACGACAACGATTATTTGAGGTT[T/C]AGAAGTCGATTGTGTATTCCAAAAAATTCAAAACTTATTTCGATGATTTTGAGCGAGGCT			T	C
2082	TM2082	A1	78665425	0.988	AAATGCAGGAACTGAATGGAGGGCAAAACTATTGTCTAAATAGGAAATTGGGGACATGAA[G/A]ATTTAAACATAGGTACATGAATACATCTATTTCATCGTTGTTAAATATTACAGGAAGGAA			G	A
2083	TM2083	A1	78667777	0.976	GTACCGGTGATCACATTGGGAGACTCTACCTCCTCCTGGGTACATATAGCATAGGTCCTC[A/G]CCGGCGCTCTCCTTCATGTGACAGCCCTAATGTGACCCTAGTCGGAAAGTGGTTTCGGGA			A	G
2084	TM2084	A1	78695187	0.988	TCTATTCTAGACCAACACATTTGGTCAATTCTCAAGGACACAAATTAATAAGGTCTAGCC[T/C]TATACATGCCATAATCAAAAATATAACTACAACTATACCTAGTATTAGGGCTGACAGAGT			T	C
2085	TM2085	A1	78698732	1	TTAGAGTAAACGTGAAAAATCGAAACCTAGTAAGTTAGGGCACGATATCTCGAACTGCCA[A/G]ATACCGAATATTGCCTTTGTTTGCAGAAATCTCATCTCGAGGTAAGAAGATGCCATATCC			A	G
2086	TM2086	A1	78701913	1	TCCCCACTGCTTAGGGAGACAAGATTTGTATTTCTCCAGCCTGTTACCCTACTACTTTGG[A/G]GGTTAAGGCTTACAAATTCACTGATCTAGGGACATGACCTGTAGAGTCGGTTTAATGTAT			A	G
2087	TM2087	A1	78711955	1	CCTTGACATCGAATAGATAAGGTAAATCGCCATAATGAAAATAGAATAGCTGTTTGATCT[T/C]GTCATCCCACTGATCCCAAATTTCTTTCATCTCTTGGAGATTATTCTGAGTTACGCTGAT			T	C
2088	TM2088	A1	78717943	0.996	AATTGGCAATGTGGTGTCAAAGGGAGTACTCACTCCCCTACCTACCAAATTTGTGGAAGA[C/T]AATTTCCATATTTAAGATGTTGCCAAATTTATTGAATCAATGATTTGTGCTATACTAATT			C	T
2091	TM2091	A1	78729555	0.965	AAAATCAAATTAAGCGAATAAGCCTACTCATTTACTTTAATTTTCCAAATTTCCAAGGGA[C/T]ATTACATTCATTACACCAGCAATAAGTCTAAATAACACCAGCACTAAGCCTGCTAAGTAC			C	T
2092	TM2092	A1	78734559	1	GGAAACTGTCGAGCACATTTTCGTGAATGTTTTTTTTTCATAGCAGGTTCTACAATGGTT[G/C]AGGTAGCTTACTCAACCACCAATGGAGAACAGAATTGGAAAATCTGGTTAGCAACGGAAT			G	C
2093	TM2093	A1	78737586	0.988	TCGACGAGGATTTTCCTAGTACAAGAAACTCCCAAATAAATCAACTGTTAGAGGCCCTTT[C/G]TATGTTGGAATTTTTGAAACCAACAATCCTTTTACAACAAACAAAGCAAGGGTTAACTAG			C	G
2094	TM2094	A1	78741641	1	GAAAGATGGATACGAAACTTATTGTGGTGAAAGAGGAGTAAAGCTATCGGGAGGGCAGAA[G/A]CAAAGGATAGCATTGGCTCGAGCCATACTAAAGACCCCAATGATCCTGCTCTTAGACGAG	Gh_A01G1302	exon4	G	A	AAG	AAA	K	K	A01	78739180	78741743	+	AT3G28345	ABC transporter family protein	Q9LHD1	AB15B_ARATH ABC transporter B family member 15 OS=Arabidopsis thaliana GN=ABCB15 PE=1 SV=1
2095	TM2095	A1	78747068	0.988	GTACTTCTTCTCTTCTGATGGGAAATGGTGTTCCCACTAAAATTTCGTCTATTGGGAATA[T/C]TGTTTATTACATCTCTCTAATGTTTTGTGCATGCCAAACATCCAGAAAAATCTTATGTTT			T	C
2096	TM2096	A1	78750167	0.935	CTGGGTGAATATTAGAGTATAGAGTCTGTTAAGAGTTGCTAATTTATGTTGCTTAAGTCT[G/A]GTATGCAGTAGTTAGGAGCAGTTACTTTTATTCATGTATAAATACCAGCAATGCATTGAT			G	A
2098	TM2098	A1	78766557	0.935	GAAATCCCTAAATTCATGTGAAGAATAATGACACTTCTGTGCATATTATTGACACTTCCG[T/C]ATATCTTATTGTGTTCTATTAAGTCTACAATTGGGCAATTGAATTACAAGGTAAGTGACC			T	C
2099	TM2099	A1	78770172	1	CTCTTGGCAAATTTAACCCATTTTGGGACAATAGTGGTTGGATTACTTCCTCGTAATCCA[C/T]ATTTTCGAAGGTACTATGCTCGAAGGTATAACACATTTGTCCGTTGTAGGTCACTCTTAC			C	T
2100	TM2100	A1	78788760	1	CGGAGGCAGCAGCGAGGGAGGCAGCGGCAGCAGTGAGGGAGGCAGAGGTAGCAGCGATGG[T/C]AGCAGAGTAGAGAAAAAAGTACGATGACCTCCAGCTACAGCTTCAGCAGATGATGAAGAT			T	C
2101	TM2101	A1	78794361	0.996	GCAAGCACCAGCCTTACTTAGCTAATAACGCAATATTAACCTTCAAGAGATCTTGGAACC[C/T]GAGCCCACCAACCTTTTTCAAAGCACACATGCCCTCCTAAGAACACCAATGAATTCCCCT			C	T
2102	TM2102	A1	78803165	0.915	CTTTTAAAAATTTTTCCAATGTGCAAGGCTCACACACCCGTGTGACCCTGGGACACGCCT[A/G]TGTTGGAGGCTGTGTTCGACCCCATGTAACTCACTGACTTGCACACACGGCCATGCCACA			A	G
2103	TM2103	A1	78805811	1	AGGTTCGAGTTGTCATTCTCACTACCTGCAGGAACACAATTCAGATGCCCCCTAAATGCA[G/A]CCCTAAAATAATGTCCGTAGGGTTTGCCAATGTATTATTGCAGAAGAAACCATGTATAAT			G	A
2104	TM2104	A1	78814382	1	ACTTATCGTGTCCTAGTCCTCTATTATTCTCACAGATTCCTCCCAATTTCCCCTCCCCTT[C/T]CTCACGTAACCAAATACTATTCATAGCTAAAGCTCTTCGAGGTTGTGTTCGTAACGACAA			C	T
2105	TM2105	A1	78822064	0.965	ATTATTCGGCTAGGCTTGGGTAACCAAGAAAATTACATGCATTTCATTATACAAGCCTAG[G/A]GACTAATTTGTAAAAGTTGTAAAAGGTTAGGGGCAAAATGGTCATTTCATCAAAGGTTGG			G	A
2106	TM2106	A1	78826221	0.935	GACTATGTATCTCAGCCGTATGGAGGACACGGCCTCTGGCCACGGTCGTGTGCCTTGGCC[T/G]TGTGCACCTAAATGAATGATGACATCATAAATAGAATGTCCAGGTTTTTGCACCGGGCTG			T	G
2108	TM2108	A1	78836966	1	GAAAAGCGAACGTAGTCGAAAATGCCTTGAGTAGAAAGTCCTTGTTCGCATTGAGGGCTA[T/C]GAACACATGATTGGCATTGTCTAATGATGGTTCAGTTTTGGCAGAGTTAAGAGCCAGATC			T	C
2109	TM2109	A1	78839477	0.935	TGCTTATATAGACCCCGAGAGACCAATCCCGGAGGTCGACCGAGGAAAATAAAAGTTTTC[G/A]GAGTAACTGAAATTCAAATCTGAAATGATTACCAGGTAAGTTCGTGTAACTCAAATGTAG			G	A
2110	TM2110	A1	78843000	1	CGCGATTTTTATATTTTATTTTAAATTATCGAGTGTTGATTTATCTCTGTCTCATTGATC[G/T]AGAGAGAGGTGGTCAAGTTATTGGTGTTGTTGTTGGGGAATCAACTTTTGGTTGAATTAT			G	T
2111	TM2111	A1	78845556	0.965	AGCTTGTGTTGTTTAATGTCATTATAGATTTTTGGAAGGTTGGATGATCGAATTGGCACT[C/A]AAGTCACACTATCCAGCTTATCTCGACAGTTTTTGAAACATTTAATTCGGATTATATGGT			C	A
2112	TM2112	A1	78848457	1	GCTTACCTCTTTTCCTTTCCATTTTTTATAGTGCCACCAAAGTAGCTCGTGGATCATCGC[C/T]TTACGTCGGAGAAGCTAGTCACACTATCCATGAAACATTTGGTATAACTAGTTTTATCAT			C	T
2113	TM2113	A1	78853512	1	TGTGTCCCGAGCTCGTGTGAATTAAATTCCAAATTCAAAACTACAGGGGTTTCACACGGC[C/T]TGACACACGCCCGTGTCCTTTACACGGCCATGGCATGCCCTTGTCCTAGCCCATGTCTAA			C	T
2114	TM2114	A1	78870760	0.988	TCTAGAATTGACTAAATTATAGCTCTGATACCACTAAATGTAACACCCCTTACCAGAGTC[T/C]GAGGCCGGAACTGGGCACGAGGCATTACTTGACTTAACCGCATGCATACAATCATTTTTG			T	C
2115	TM2115	A1	78875628	0.996	TGCAAGTTTTAGGATCGTGTTTTACACAGCCTCAAAGGGCAATTCAGCAGCCACTTAAGG[G/T]CCGTGGACCAGCTATGGGTGGTAATGGTATGGGTCGTGGACAGAGAGCACCAGGAAAAGG			G	T
2116	TM2116	A1	78886422	0.965	GACCCCGGTAGTTTGTAACAGCCTGAAAAATAGTGGTGTCAAAAATGGTAGTTTCAGAAC[T/C]CCATTCTTCTATGATCAAGTCCATAAATGTTATTGATTAATATTTACGAATCAATGATAA			T	C
2117	TM2117	A1	78897307	0.976	ACAGTCAGGTATACGGTATGCAGAAACAGACTGGGCCGAGCCCATCGCAGAAATAGTATC[G/A]GGTGGGCCTTAGCCTAATAACAGAATTAGGTGGGCCTAAGCCCAATACAGAATCAGTATC			G	A
2118	TM2118	A1	78903579	0.988	TTCCAATTTATTTGCACTTGTATACACCCTGAGGTAAATGTGGCTAAGATCAATGTTTTC[A/G]TAGCCACTATGTTTATGCCATTGTGCAGAAAGAAACACTTTGCATTGGAACCTAGATATA			A	G
2119	TM2119	A1	78908083	1	CATCTCACTTAAAGCACTTACCCCAAAAGTGAATAGACCACTTGTAATGAGAAGAATAAT[C/T]GGCTTGAACTTCCACAATGGAATCCACACTCCTAGCAAGATTAGTGTAATAGCCCAAAAT			C	T
2120	TM2120	A1	78912408	1	AGTGCCAGAGTTCAAAGCCGGCAAGATTGTTCTCCAAATTCGAACTTGCTTGATTTTCTC[A/T]TTAATTTCCTCCCATCCATCTCCTTAAATTCAGCTAACAATAACCCCATTCAAATCTGTT			A	T
2121	TM2121	A1	78915657	1	GCATAATCTGCCATTGTACAGGCTTCTGGCAAACTAAAGTTGGCACATAAAGTATCAACC[C/A]GTAATAGTATCTAAGGATTTTATCTATGGGTATTATTCAATTGAAGAAAGGGTACGACAA			C	A
2122	TM2122	A1	78922781	0.988	GCTGTAAATATTAAAATAGTAATAAAATAAAATTTTTGATGTCTTATTTGTGGTCCTAAA[G/A]CCACTATTCCTATTAACCCTAAAAACGGGTTGTTACAGGATACTTTGATGTGCAAAGAGA			G	A
2127	TM2127	A1	78966510	0.935	GTGGCAAGAGTCGTGCCCACGACTCCAAATGTACCTTTAACAAAAATAAACAAGTAATTT[A/G]GGGAGTTTGAGAATGTTTAAGAAAGTAAAATAATCTAATCAGCTAAAATAAACAATTGAA			A	G
[truncated: 75,776 more rows]
